# Supplementary material for: Regulation of pulmonary surfactant by the adhesion GPCR GPR116/ADGRF5 requires a tethered agonist-mediated activation mechanism
Source: eLife journal article supplement (doi:10.7554/elife.69061), 2022-09-08
Supplement: fig5-data1 [file elife-69061-fig5-data1-v2.pdf]

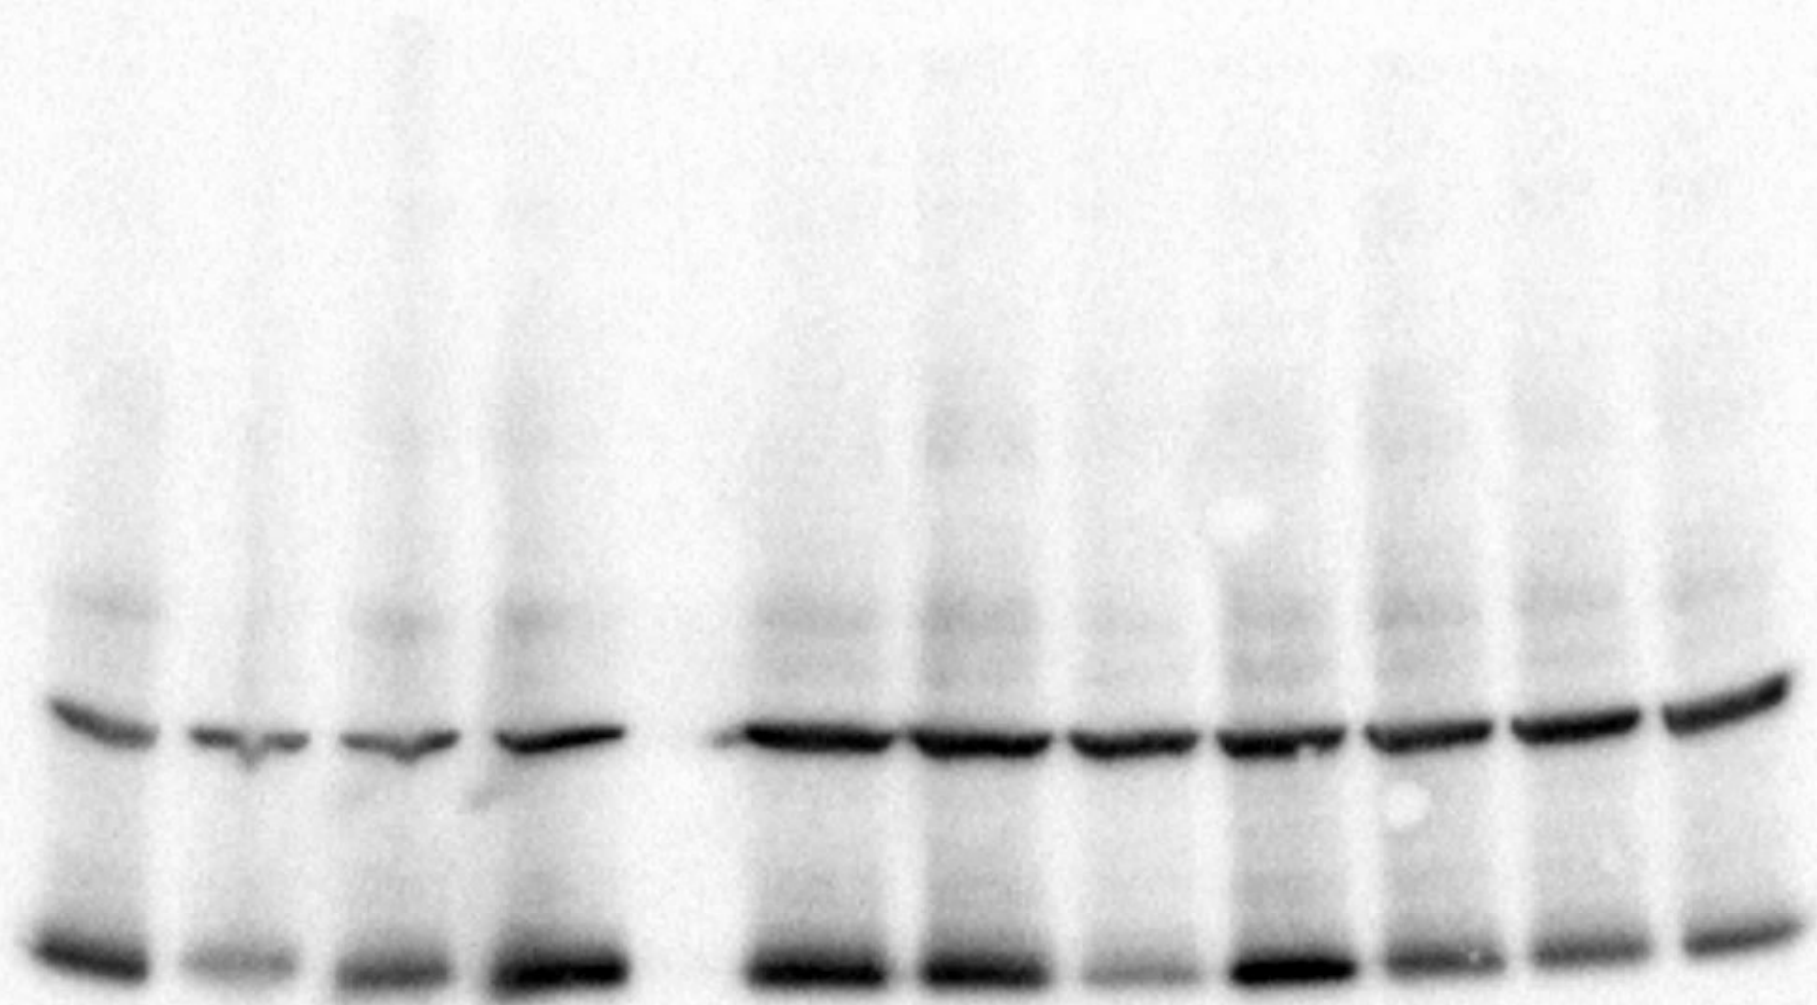

100kDa 100kDa 100kDa 100kDa 100kDa 100kDa 100kDa 100kDa 100kDa 100kDa
