# Supplementary material for: Regulation of pulmonary surfactant by the adhesion GPCR GPR116/ADGRF5 requires a tethered agonist-mediated activation mechanism
Source: eLife journal article supplement (doi:10.7554/elife.69061), 2022-09-08
Supplement: supp [file elife-69061-supp-v1.zip]

Archive with 31 entries (31 files):
- elife_poa_e69061_Figure_2_figure_supplement_1.pdf
- elife_poa_e69061_Figure_3_figure_supplement_1.pdf
- elife_poa_e69061_Figure_3_figure_supplement_2.pdf
- elife_poa_e69061_Figure_4_figure_supplement_1.pdf
- elife_poa_e69061_Figure_4_figure_supplement_2.pdf
- elife_poa_e69061_Figure_4_figure_supplement_3.pdf
- elife_poa_e69061_Figure_4_figure_supplement_4.pdf
- elife_poa_e69061_Figure_5_figure_supplement_1.pdf
- elife_poa_e69061_Figure_6_figure_supplement_1.pdf
- elife_poa_e69061_Supplementary_file_1.docx
- elife_poa_e69061_Supplementary_file_2.docx
- elife_poa_e69061_Figure_1_source_data_1.pptx
- elife_poa_e69061_Figure_1_source_data_2.pdf
- elife_poa_e69061_Figure_3_source_data_1.pdf
- elife_poa_e69061_Figure_3_source_data_2.pdf
- elife_poa_e69061_Figure_3_source_data_3.docx
- elife_poa_e69061_Figure_4_source_data_1.pdf
- elife_poa_e69061_Figure_4_source_data_2.pdf
- elife_poa_e69061_Figure_4_source_data_3.pptx
- elife_poa_e69061_Figure_4_source_data_4.docx
- elife_poa_e69061_Figure_4_source_data_5.pdf
- elife_poa_e69061_Figure_4_source_data_6.pptx
- elife_poa_e69061_Figure_4_source_data_7.pdf
- elife_poa_e69061_Figure_4_source_data_8.pdf
- elife_poa_e69061_Figure_4_source_data_9.pptx
- elife_poa_e69061_Figure_5_source_data_1.pdf
- elife_poa_e69061_Figure_5_source_data_2.pptx
- elife_poa_e69061_Figure_6_source_data_1.pdf
- elife_poa_e69061_Figure_6_source_data_2.pptx
- elife_poa_e69061_Figure_8_source_data_1.txt
- elife_poa_e69061_Transparent_Reporting_File.docx
