# Supplementary material for: Regulation of pulmonary surfactant by the adhesion GPCR GPR116/ADGRF5 requires a tethered agonist-mediated activation mechanism
Source: eLife journal article supplement (doi:10.7554/elife.69061), 2022-09-08
Supplement: supp [file elife-69061-supp-v1.zip › elife_poa_e69061_Figure_4_figure_supplement_2.pdf]

Figure 4 - supplement figure 2

|             |                                |                                                                              |                                |                        |
|-------------|--------------------------------|------------------------------------------------------------------------------|--------------------------------|------------------------|
|             | tethered peptide (993 - 1008)  |                                                                              |                                |                        |
| hGPR116 CTF | TSFSILMSPDSPDPSS               |                                                                              |                                |                        |
| mGPR116 CTF | TSFSILMSPDSPDPGS               |                                                                              |                                |                        |
|             |                                |                                                                              |                                |                        |
|             |                                |                                                                              |                                |                        |
|             | TM1 (1009 - 1038)              | ICL1 (1039 - 1054)                                                           | TM2 (1055 - 1080)              | ECL1 (1081 - 1087)     |
| hGPR116 CTF | LLGILLDIISYVGVGFSILSLAACLVVEAV | VWKSVTKNRTSYMRHT                                                             | CIVNIAASLLVANTWFIVVAIQDNR      | YILCKTA                |
| mGPR116 CTF | LLKILLDIISYIGLGFSIVSLAACLVVEAM | VWKSVTKNRTSYMRHI                                                             | CIVNIAFCLLIADIWFIVAGAIHDGR     | YPLNETA                |
|             |                                |                                                                              |                                |                        |
|             |                                |                                                                              |                                |                        |
|             | TM3 (1088 - 1113)              | ICL2 (1114 - 1130)                                                           | TM4 (1131 - 1152)              | ECL2 (1153 - 1174)     |
| hGPR116 CTF | CVAATFFFIHFFYLSVFFWMLTLGLML    | FYRLVFILHETSRSTQK                                                            | AIAFCLGYGCPLAISVITLGAT         | QPREVYTRKNVCWLNWEDTKAL |
| mGPR116 CTF | CVAATFFFIHFFYLSVFFWMLTLGLML    | FYRLIFILHDASKSTQK                                                            | AIAFSLGYGCPLIISITVGVV          | QPEVYMRKNACWLNWEDTRAL  |
|             |                                |                                                                              |                                |                        |
|             |                                |                                                                              |                                |                        |
|             | TM5 (1175 - 1200)              | ILC3 (1201 - 1209)                                                           | TM6 (1210 - 1239)              | ECL3 (1240 - 1245)     |
| hGPR116 CTF | LAFaipaliivvvnITITIVVITKIL     | RPSIGDKPC                                                                    | KQEKSSLFQISKSIGVLTPLLGLTWGFGLT | TVFPGT                 |
| mGPR116 CTF | LAFaipaliivvvnVSITVVVITKIL     | RPSIGDKPG                                                                    | KQEKSSLFQISKSIGVLTPLLGLTWGFGLA | TVIQGS                 |
|             |                                |                                                                              |                                |                        |
|             |                                |                                                                              |                                |                        |
|             | TM7 (1246 - 1271)              | Ct tail (1272 - 1348)                                                        |                                |                        |
| hGPR116 CTF | NLVFHIIIFAILNVFQGLFILLFGCLW    | DLKVQEALLNKFSLRWSSQHSKSTSLSGSSTPVFSMSSPISRRFNNLFGKTGTYNVSTPEATSSSLENSSSASLLN |                                |                        |
| mGPR116 CTF | NAVFHIIIFTLNAAFQGLFILLFGCLW    | DQKVQEALLHKFSLRWSSQHSKSTSIGSSTPVFSMSSPISRRFNNLFGKTGTYNVSTPETTSSSLENSSSAYSLN  |                                |                        |
