# Supplementary material for: Regulation of pulmonary surfactant by the adhesion GPCR GPR116/ADGRF5 requires a tethered agonist-mediated activation mechanism
Source: eLife journal article supplement (doi:10.7554/elife.69061), 2022-09-08

Figure 6 - supplement figure 1

A

| Region | human GPR116 | mouse GPR116 |
|--------|--------------|--------------|
| TM1    | V1022        | L1022        |
| TM2    | T1068        | I1068        |
| TM2    | A1074        | G1074        |
| TM2    | N1079        | G1079        |
| ECL1   | I1082        | P1082        |
| ECL2   | K1172        | R1172        |
| TM5    | I1189        | V1189        |
| TM5    | I1193        | V1193        |
| TM7    | A1254        | T1254        |
| TM7    | V1258        | A1258        |

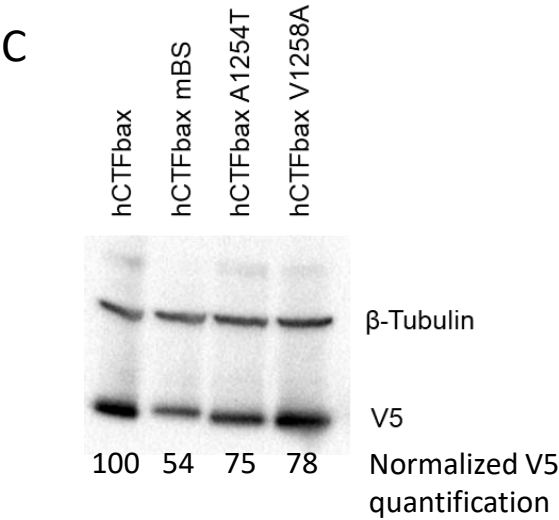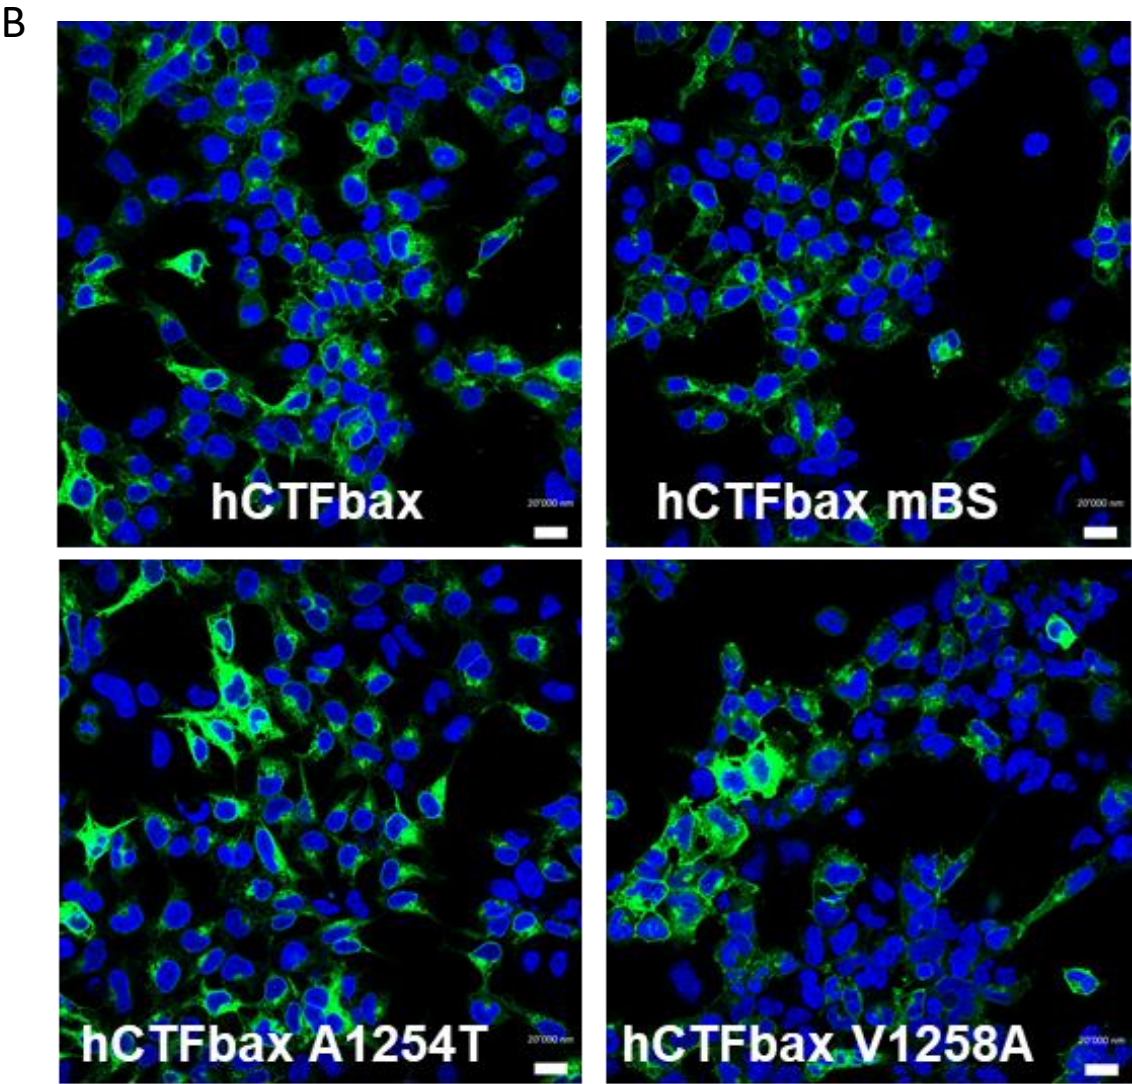

Supplement: supp [file elife-69061-supp-v1.zip › elife_poa_e69061_Figure_6_figure_supplement_1.pdf]
