# Supplementary material for: Regulation of pulmonary surfactant by the adhesion GPCR GPR116/ADGRF5 requires a tethered agonist-mediated activation mechanism
Source: eLife journal article supplement (doi:10.7554/elife.69061), 2022-09-08
Supplement: supp [file elife-69061-supp-v1.zip › elife_poa_e69061_Figure_8_source_data_1.txt]

TITLE     GPR116Final
REMARK   4      COMPLIES WITH FORMAT V. 3.0, 1-DEC-2006
REMARK 888
REMARK 888 WRITTEN BY MAESTRO (A PRODUCT OF SCHRODINGER, LLC)
SEQRES   1 A  280  THR SER PHE SER ILE LEU MET SER PRO ASP SER PRO ASP
SEQRES   2 A  280  PRO SER SER LEU LEU GLY ILE LEU LEU ASP ILE ILE SER
SEQRES   3 A  280  TYR VAL GLY VAL GLY PHE SER ILE LEU SER LEU ALA ALA
SEQRES   4 A  280  CYS LEU VAL VAL GLU ALA VAL VAL TRP LYS SER VAL THR
SEQRES   5 A  280  LYS ASN ARG THR SER TYR MET ARG HIS THR CYS ILE VAL
SEQRES   6 A  280  ASN ILE ALA ALA SER LEU LEU VAL ALA ASN THR TRP PHE
SEQRES   7 A  280  ILE VAL VAL ALA ALA ILE GLN ASP ASN ARG TYR ILE LEU
SEQRES   8 A  280  CYS LYS THR ALA CYS VAL ALA ALA THR PHE PHE ILE HIS
SEQRES   9 A  280  PHE PHE TYR LEU SER VAL PHE PHE TRP MET LEU THR LEU
SEQRES  10 A  280  GLY LEU MET LEU PHE TYR ARG LEU VAL PHE ILE LEU HIS
SEQRES  11 A  280  GLU THR SER ARG SER THR GLN LYS ALA ILE ALA PHE CYS
SEQRES  12 A  280  LEU GLY TYR GLY CYS PRO LEU ALA ILE SER VAL ILE THR
SEQRES  13 A  280  LEU GLY ALA THR GLN PRO ARG GLU VAL TYR THR ARG LYS
SEQRES  14 A  280  ASN VAL CYS TRP LEU ASN TRP GLU ASP THR LYS ALA LEU
SEQRES  15 A  280  LEU ALA PHE ALA ILE PRO ALA LEU ILE ILE VAL VAL VAL
SEQRES  16 A  280  ASN ILE THR ILE THR ILE VAL VAL ILE THR LYS ILE LEU
SEQRES  17 A  280  ARG PRO SER ILE GLY ASP LYS PRO CYS LYS GLN GLU LYS
SEQRES  18 A  280  SER SER LEU PHE GLN ILE SER LYS SER ILE GLY VAL LEU
SEQRES  19 A  280  THR PRO LEU LEU GLY LEU THR TRP GLY PHE GLY LEU THR
SEQRES  20 A  280  THR VAL PHE PRO GLY THR ASN LEU VAL PHE HIS ILE ILE
SEQRES  21 A  280  PHE ALA ILE LEU ASN VAL PHE GLN GLY LEU PHE ILE LEU
SEQRES  22 A  280  LEU PHE GLY CYS LEU TRP ASP
HELIX    1   1 GLY A   19  VAL A   46  1
HELIX    2   2 ARG A   55  ALA A   82  1
HELIX    3   3 CYS A   96  VAL A  126  1
HELIX    4   4 ARG A  134  GLY A  145  1
HELIX    5   5 GLY A  147  ALA A  159  1
HELIX    6   6 LEU A  183  ILE A  207  1
HELIX    7   7 SER A  222  LEU A  238  1
HELIX    8   8 GLY A  245  VAL A  249  1
HELIX    9   9 LEU A  255  LEU A  264  1
HELIX   10  10 GLN A  268  LEU A  274  1
HELIX   11  11 LEU A  273  GLN A  268  1
HELIX   12  12 LEU A  264  THR A  248  1
HELIX   13  13 LEU A  238  SER A  223  1
HELIX   14  14 THR A  205  LEU A  183  1
HELIX   15  15 THR A  156  CYS A  148  1
HELIX   16  16 LEU A  144  PHE A  142  1
HELIX   17  17 TYR A  123  THR A   56  1
HELIX   18  18 GLU A   44  ILE A   25  1
HELIX   19  19 GLY A   19  VAL A   46  1
HELIX   20  20 ARG A   55  ALA A   82  1
HELIX   21  21 CYS A   96  VAL A  126  1
HELIX   22  22 ARG A  134  GLY A  145  1
HELIX   23  23 GLY A  147  ALA A  159  1
HELIX   24  24 LEU A  183  ILE A  207  1
HELIX   25  25 SER A  222  LEU A  238  1
HELIX   26  26 GLY A  245  VAL A  249  1
HELIX   27  27 LEU A  255  LEU A  264  1
HELIX   28  28 GLN A  268  LEU A  274  1
HELIX   29  29 ILE A   20  VAL A   46  1
HELIX   30  30 ARG A   55  VAL A   81  1
HELIX   31  31 VAL A   97  VAL A  126  1
HELIX   32  32 ARG A  134  LEU A  157  1
HELIX   33  33 ILE A  187  ILE A  207  1
HELIX   34  34 SER A  222  THR A  247  1
HELIX   35  35 VAL A  256  ILE A  263  1
HELIX   36  36 LEU A  270  LEU A  274  1
TURN     1   1 THR A   1  LEU A  18
TURN     2   2 VAL A  47  ASN A  54
TURN     3   3 ALA A  83  ALA A  95
TURN     4   4 PHE A 127  SER A 133
TURN     5   5 TYR A 146  TYR A 146
TURN     6   6 THR A 160  LEU A 182
TURN     7   7 LEU A 208  LYS A 221
TURN     8   8 GLY A 239  PHE A 244
TURN     9   9 PHE A 250  ASN A 254
TURN    10  10 ASN A 265  PHE A 267
TURN    11  11 PHE A 275  PHE A 275
TURN    12  12 PHE A 267  ASN A 265
TURN    13  13 PHE A 244  LEU A 240
TURN    14  14 LYS A 221  ARG A 209
TURN    15  15 LEU A 182  GLN A 161
TURN    16  16 TYR A 146  TYR A 146
TURN    17  17 HIS A 130  HIS A 130
TURN    18  18 VAL A  51  TRP A  48
TURN    19  19 SER A  16  LEU A  18
TURN    20  20 VAL A  47  ASN A  54
TURN    21  21 ALA A  83  ALA A  95
TURN    22  22 PHE A 127  SER A 133
TURN    23  23 TYR A 146  TYR A 146
TURN    24  24 THR A 160  LEU A 182
TURN    25  25 LEU A 208  LYS A 221
TURN    26  26 GLY A 239  PHE A 244
TURN    27  27 PHE A 250  ASN A 254
TURN    28  28 ASN A 265  PHE A 267
TURN    29  29 PHE A 275  LEU A  18
TURN    30  30 VAL A  47  ASN A  54
TURN    31  31 ILE A  84  THR A  94
TURN    32  32 PHE A 127  SER A 133
TURN    33  33 THR A 160  LYS A 180
TURN    34  34 LEU A 208  GLU A 220
TURN    35  35 PHE A 250  ASN A 254
TURN    36  36 VAL A 266  VAL A 266
TURN    37  37 CYS A 277  ASP A 280
SSBOND   1 CYS A  172    CYS A   96                          1555   1555  2.39
ATOM      1  N   THR A   1     148.572 120.243 151.848  1.00  0.00         0 N1+
ATOM      2  CA  THR A   1     149.535 120.007 152.938  1.00  0.00         0 C  
ATOM      3  C   THR A   1     149.930 121.333 153.559  1.00  0.00         0 C  
ATOM      4  O   THR A   1     149.090 122.047 154.109  1.00  0.00         0 O  
ATOM      5  CB  THR A   1     150.713 119.069 152.493  1.00  0.00         0 C  
ATOM      6  OG1 THR A   1     151.616 119.662 151.566  1.00  0.00           O  
ATOM      7  CG2 THR A   1     150.263 117.731 151.891  1.00  0.00           C  
ATOM      8  H1  THR A   1     148.206 119.361 151.521  1.00  0.00           H  
ATOM      9  H2  THR A   1     147.821 120.822 152.196  1.00  0.00           H  
ATOM     10  H3  THR A   1     149.043 120.717 151.091  1.00  0.00           H  
ATOM     11  HA  THR A   1     148.979 119.479 153.713  1.00  0.00           H  
ATOM     12  HB3 THR A   1     151.294 118.838 153.389  1.00  0.00           H  
ATOM     13  HG1 THR A   1     152.201 118.993 151.231  1.00  0.00           H  
ATOM     14 HG21 THR A   1     151.108 117.057 151.747  1.00  0.00           H  
ATOM     15 HG22 THR A   1     149.556 117.220 152.547  1.00  0.00           H  
ATOM     16 HG23 THR A   1     149.787 117.864 150.919  1.00  0.00           H  
ATOM     17  N   SER A   2     151.205 121.681 153.417  1.00  0.00         0 N  
ATOM     18  CA  SER A   2     151.762 122.928 153.864  1.00  0.00         0 C  
ATOM     19  C   SER A   2     151.258 124.116 153.085  1.00  0.00         0 C  
ATOM     20  O   SER A   2     151.147 125.211 153.631  1.00  0.00         0 O  
ATOM     21  CB  SER A   2     153.305 122.860 153.777  1.00  0.00           C  
ATOM     22  OG  SER A   2     153.854 122.737 152.467  1.00  0.00           O  
ATOM     23  H   SER A   2     151.794 121.081 152.845  1.00  0.00         0 H  
ATOM     24  HB2 SER A   2     153.724 123.776 154.188  1.00  0.00           H  
ATOM     25  HB3 SER A   2     153.651 122.041 154.400  1.00  0.00           H  
ATOM     26  HG  SER A   2     154.795 122.635 152.564  1.00  0.00           H  
ATOM     27  HA  SER A   2     151.483 123.072 154.911  1.00  0.00           H  
ATOM     28  N   PHE A   3     151.052 123.877 151.786  1.00  0.00         0 N  
ATOM     29  CA  PHE A   3     150.768 124.864 150.764  1.00  0.00         0 C  
ATOM     30  C   PHE A   3     152.020 125.596 150.302  1.00  0.00         0 C  
ATOM     31  O   PHE A   3     152.004 126.355 149.342  1.00  0.00         0 O  
ATOM     32  CB  PHE A   3     149.600 125.800 151.208  1.00  0.00           C  
ATOM     33  CG  PHE A   3     148.877 126.638 150.168  1.00  0.00           C  
ATOM     34  CD1 PHE A   3     147.686 126.168 149.573  1.00  0.00           C  
ATOM     35  CD2 PHE A   3     149.334 127.939 149.871  1.00  0.00           C  
ATOM     36  CE1 PHE A   3     146.955 126.992 148.695  1.00  0.00           C  
ATOM     37  CE2 PHE A   3     148.600 128.764 149.000  1.00  0.00           C  
ATOM     38  CZ  PHE A   3     147.407 128.295 148.417  1.00  0.00           C  
ATOM     39  H   PHE A   3     151.256 122.938 151.478  1.00  0.00         0 H  
ATOM     40  HB2 PHE A   3     148.839 125.208 151.718  1.00  0.00           H  
ATOM     41  HB3 PHE A   3     149.953 126.510 151.956  1.00  0.00           H  
ATOM     42  HD1 PHE A   3     147.306 125.186 149.806  1.00  0.00           H  
ATOM     43  HD2 PHE A   3     150.242 128.314 150.322  1.00  0.00           H  
ATOM     44  HE1 PHE A   3     146.041 126.632 148.242  1.00  0.00           H  
ATOM     45  HE2 PHE A   3     148.957 129.756 148.779  1.00  0.00           H  
ATOM     46  HZ  PHE A   3     146.837 128.930 147.754  1.00  0.00           H  
ATOM     47  HA  PHE A   3     150.412 124.299 149.904  1.00  0.00           H  
ATOM     48  N   SER A   4     153.133 125.341 150.980  1.00  0.00         0 N  
ATOM     49  CA  SER A   4     154.369 126.037 150.737  1.00  0.00         0 C  
ATOM     50  C   SER A   4     155.187 125.392 149.638  1.00  0.00         0 C  
ATOM     51  O   SER A   4     155.837 126.073 148.843  1.00  0.00         0 O  
ATOM     52  CB  SER A   4     155.210 126.056 152.035  1.00  0.00         0 C  
ATOM     53  OG  SER A   4     154.690 127.000 152.959  1.00  0.00           O  
ATOM     54  H   SER A   4     153.096 124.663 151.730  1.00  0.00         0 H  
ATOM     55  HA  SER A   4     154.179 127.070 150.436  1.00  0.00           H  
ATOM     56  HB2 SER A   4     155.267 125.071 152.499  1.00  0.00           H  
ATOM     57  HB3 SER A   4     156.239 126.353 151.820  1.00  0.00           H  
ATOM     58  HG  SER A   4     153.792 126.777 153.164  1.00  0.00           H  
ATOM     59  N   ILE A   5     155.007 124.078 149.524  1.00  0.00         0 N  
ATOM     60  CA  ILE A   5     155.440 123.218 148.445  1.00  0.00         0 C  
ATOM     61  C   ILE A   5     155.101 123.691 147.039  1.00  0.00         0 C  
ATOM     62  O   ILE A   5     155.723 123.272 146.068  1.00  0.00         0 O  
ATOM     63  CB  ILE A   5     154.844 121.802 148.692  1.00  0.00           C  
ATOM     64  CG1 ILE A   5     153.317 121.824 148.981  1.00  0.00           C  
ATOM     65  CG2 ILE A   5     155.620 121.052 149.793  1.00  0.00           C  
ATOM     66  CD1 ILE A   5     152.592 120.558 148.521  1.00  0.00           C  
ATOM     67  H   ILE A   5     154.433 123.639 150.226  1.00  0.00         0 H  
ATOM     68  HB  ILE A   5     154.996 121.231 147.772  1.00  0.00           H  
ATOM     69 HG12 ILE A   5     153.132 121.982 150.043  1.00  0.00           H  
ATOM     70 HG13 ILE A   5     152.843 122.662 148.469  1.00  0.00           H  
ATOM     71 HG21 ILE A   5     155.241 120.040 149.933  1.00  0.00           H  
ATOM     72 HG22 ILE A   5     156.675 120.969 149.529  1.00  0.00           H  
ATOM     73 HG23 ILE A   5     155.568 121.566 150.750  1.00  0.00           H  
ATOM     74 HD11 ILE A   5     151.526 120.608 148.739  1.00  0.00           H  
ATOM     75 HD12 ILE A   5     152.699 120.414 147.445  1.00  0.00           H  
ATOM     76 HD13 ILE A   5     152.985 119.678 149.025  1.00  0.00           H  
ATOM     77  HA  ILE A   5     156.522 123.131 148.452  1.00  0.00           H  
ATOM     78  N   LEU A   6     154.122 124.589 146.951  1.00  0.00         0 N  
ATOM     79  CA  LEU A   6     153.745 125.268 145.748  1.00  0.00         0 C  
ATOM     80  C   LEU A   6     154.879 125.938 144.995  1.00  0.00         0 C  
ATOM     81  O   LEU A   6     154.907 125.914 143.769  1.00  0.00         0 O  
ATOM     82  CB  LEU A   6     152.620 126.291 146.022  1.00  0.00           C  
ATOM     83  CG  LEU A   6     151.186 125.743 145.884  1.00  0.00           C  
ATOM     84  CD1 LEU A   6     150.863 124.581 146.832  1.00  0.00           C  
ATOM     85  CD2 LEU A   6     150.185 126.888 146.077  1.00  0.00           C  
ATOM     86  H   LEU A   6     153.682 124.890 147.807  1.00  0.00         0 H  
ATOM     87  HB2 LEU A   6     152.769 126.767 146.989  1.00  0.00           H  
ATOM     88  HB3 LEU A   6     152.695 127.116 145.310  1.00  0.00           H  
ATOM     89  HG  LEU A   6     151.068 125.371 144.864  1.00  0.00           H  
ATOM     90 HD11 LEU A   6     149.838 124.244 146.684  1.00  0.00           H  
ATOM     91 HD12 LEU A   6     151.514 123.723 146.666  1.00  0.00           H  
ATOM     92 HD13 LEU A   6     150.954 124.883 147.871  1.00  0.00           H  
ATOM     93 HD21 LEU A   6     149.154 126.541 146.065  1.00  0.00           H  
ATOM     94 HD22 LEU A   6     150.340 127.391 147.032  1.00  0.00           H  
ATOM     95 HD23 LEU A   6     150.288 127.626 145.282  1.00  0.00           H  
ATOM     96  HA  LEU A   6     153.353 124.511 145.067  1.00  0.00           H  
ATOM     97  N   MET A   7     155.795 126.538 145.747  1.00  0.00         0 N  
ATOM     98  CA  MET A   7     156.982 127.159 145.201  1.00  0.00         0 C  
ATOM     99  C   MET A   7     158.233 126.687 145.902  1.00  0.00         0 C  
ATOM    100  O   MET A   7     159.325 126.946 145.405  1.00  0.00         0 O  
ATOM    101  CB  MET A   7     156.820 128.697 145.163  1.00  0.00         0 C  
ATOM    102  CG  MET A   7     155.630 129.155 144.298  1.00  0.00           C  
ATOM    103  SD  MET A   7     155.380 130.946 144.207  1.00  0.00           S  
ATOM    104  CE  MET A   7     153.928 130.965 143.123  1.00  0.00           C  
ATOM    105  H   MET A   7     155.696 126.483 146.753  1.00  0.00         0 H  
ATOM    106  HA  MET A   7     157.134 126.830 144.170  1.00  0.00           H  
ATOM    107  HB2 MET A   7     156.707 129.084 146.176  1.00  0.00           H  
ATOM    108  HB3 MET A   7     157.733 129.148 144.770  1.00  0.00           H  
ATOM    109  HG2 MET A   7     155.732 128.766 143.284  1.00  0.00           H  
ATOM    110  HG3 MET A   7     154.707 128.735 144.696  1.00  0.00           H  
ATOM    111  HE1 MET A   7     153.629 131.993 142.920  1.00  0.00           H  
ATOM    112  HE2 MET A   7     154.144 130.467 142.178  1.00  0.00           H  
ATOM    113  HE3 MET A   7     153.091 130.448 143.592  1.00  0.00           H  
ATOM    114  N   SER A   8     158.101 125.986 147.032  1.00  0.00         0 N  
ATOM    115  CA  SER A   8     159.256 125.488 147.727  1.00  0.00         0 C  
ATOM    116  C   SER A   8     159.782 124.209 147.099  1.00  0.00         0 C  
ATOM    117  O   SER A   8     159.014 123.394 146.581  1.00  0.00         0 O  
ATOM    118  CB  SER A   8     158.961 125.328 149.247  1.00  0.00           C  
ATOM    119  OG  SER A   8     158.353 124.110 149.631  1.00  0.00           O  
ATOM    120  H   SER A   8     157.198 125.736 147.409  1.00  0.00         0 H  
ATOM    121  HB2 SER A   8     159.900 125.397 149.798  1.00  0.00           H  
ATOM    122  HB3 SER A   8     158.362 126.163 149.611  1.00  0.00           H  
ATOM    123  HG  SER A   8     158.286 124.066 150.586  1.00  0.00           H  
ATOM    124  HA  SER A   8     159.993 126.289 147.675  1.00  0.00           H  
ATOM    125  N   PRO A   9     161.107 124.029 147.156  1.00  0.00         0 N  
ATOM    126  CA  PRO A   9     161.709 122.795 146.689  1.00  0.00         0 C  
ATOM    127  C   PRO A   9     161.659 121.692 147.741  1.00  0.00         0 C  
ATOM    128  O   PRO A   9     161.541 120.509 147.431  1.00  0.00         0 O  
ATOM    129  CB  PRO A   9     163.173 123.235 146.467  1.00  0.00         0 C  
ATOM    130  CG  PRO A   9     163.443 124.342 147.472  1.00  0.00           C  
ATOM    131  CD  PRO A   9     162.139 125.130 147.434  1.00  0.00           C  
ATOM    132  HA  PRO A   9     161.268 122.438 145.756  1.00  0.00           H  
ATOM    133  HB1 PRO A   9     163.896 122.418 146.513  1.00  0.00           H  
ATOM    134  HB2 PRO A   9     163.254 123.712 145.494  1.00  0.00           H  
ATOM    135  HG2 PRO A   9     163.621 123.929 148.466  1.00  0.00           H  
ATOM    136  HG3 PRO A   9     164.310 124.953 147.211  1.00  0.00           H  
ATOM    137  HD2 PRO A   9     161.903 125.534 148.420  1.00  0.00           H  
ATOM    138  HD3 PRO A   9     162.235 125.965 146.737  1.00  0.00           H  
ATOM    139  N   ASP A  10     161.761 122.117 148.997  1.00  0.00         0 N  
ATOM    140  CA  ASP A  10     161.589 121.340 150.184  1.00  0.00         0 C  
ATOM    141  C   ASP A  10     160.988 122.227 151.263  1.00  0.00         0 C  
ATOM    142  O   ASP A  10     161.071 123.454 151.185  1.00  0.00         0 O  
ATOM    143  CB  ASP A  10     162.880 120.585 150.583  1.00  0.00         0 C  
ATOM    144  CG  ASP A  10     162.626 119.488 151.619  1.00  0.00           C  
ATOM    145  OD1 ASP A  10     162.123 118.424 151.203  1.00  0.00           O1-
ATOM    146  OD2 ASP A  10     162.872 119.740 152.817  1.00  0.00           O  
ATOM    147  H   ASP A  10     161.787 123.115 149.161  1.00  0.00         0 H  
ATOM    148  HA  ASP A  10     160.823 120.595 149.951  1.00  0.00           H  
ATOM    149  HB2 ASP A  10     163.325 120.113 149.706  1.00  0.00           H  
ATOM    150  HB3 ASP A  10     163.625 121.285 150.965  1.00  0.00           H  
ATOM    151  N   SER A  11     160.376 121.586 152.254  1.00  0.00         0 N  
ATOM    152  CA  SER A  11     159.538 122.202 153.250  1.00  0.00         0 C  
ATOM    153  C   SER A  11     159.889 121.617 154.569  1.00  0.00         0 C  
ATOM    154  O   SER A  11     159.410 120.521 154.863  1.00  0.00         0 O  
ATOM    155  CB  SER A  11     158.097 122.219 152.662  1.00  0.00         0 C  
ATOM    156  OG  SER A  11     157.682 123.538 152.346  1.00  0.00           O  
ATOM    157  H   SER A  11     160.474 120.581 152.287  1.00  0.00         0 H  
ATOM    158  HA  SER A  11     159.799 123.254 153.272  1.00  0.00           H  
ATOM    159  HB2 SER A  11     158.023 121.613 151.756  1.00  0.00           H  
ATOM    160  HB3 SER A  11     157.346 121.818 153.314  1.00  0.00           H  
ATOM    161  HG  SER A  11     157.589 124.010 153.171  1.00  0.00           H  
ATOM    162  N   PRO A  12     160.712 122.323 155.372  1.00  0.00         0 N  
ATOM    163  CA  PRO A  12     161.090 121.873 156.690  1.00  0.00         0 C  
ATOM    164  C   PRO A  12     159.988 121.820 157.747  1.00  0.00         0 C  
ATOM    165  O   PRO A  12     160.165 122.212 158.888  1.00  0.00         0 O  
ATOM    166  CB  PRO A  12     162.280 122.756 157.101  1.00  0.00         0 C  
ATOM    167  CG  PRO A  12     161.983 124.067 156.418  1.00  0.00           C  
ATOM    168  CD  PRO A  12     161.342 123.629 155.105  1.00  0.00           C  
ATOM    169  HA  PRO A  12     161.460 120.849 156.613  1.00  0.00           H  
ATOM    170  HB1 PRO A  12     162.426 122.869 158.176  1.00  0.00           H  
ATOM    171  HB2 PRO A  12     163.204 122.338 156.698  1.00  0.00           H  
ATOM    172  HG2 PRO A  12     161.259 124.630 157.011  1.00  0.00           H  
ATOM    173  HG3 PRO A  12     162.856 124.696 156.289  1.00  0.00           H  
ATOM    174  HD2 PRO A  12     160.659 124.405 154.764  1.00  0.00           H  
ATOM    175  HD3 PRO A  12     162.103 123.495 154.334  1.00  0.00           H  
ATOM    176  N   ASP A  13     158.836 121.324 157.330  1.00  0.00         0 N  
ATOM    177  CA  ASP A  13     157.523 121.444 157.891  1.00  0.00         0 C  
ATOM    178  C   ASP A  13     157.006 120.067 157.627  1.00  0.00         0 C  
ATOM    179  O   ASP A  13     157.133 119.255 158.539  1.00  0.00         0 O  
ATOM    180  CB  ASP A  13     156.895 122.763 157.205  1.00  0.00         0 C  
ATOM    181  CG  ASP A  13     157.384 123.495 155.948  1.00  0.00           C  
ATOM    182  OD1 ASP A  13     156.580 123.621 154.997  1.00  0.00           O1-
ATOM    183  OD2 ASP A  13     158.519 123.995 155.958  1.00  0.00           O  
ATOM    184  H   ASP A  13     158.878 120.980 156.373  1.00  0.00         0 H  
ATOM    185  HA  ASP A  13     157.807 121.561 158.927  1.00  0.00           H  
ATOM    186  HB2 ASP A  13     155.907 122.550 156.853  1.00  0.00           H  
ATOM    187  HB3 ASP A  13     156.781 123.546 157.941  1.00  0.00           H  
ATOM    188  N   PRO A  14     156.333 119.759 156.498  1.00  0.00         0 N  
ATOM    189  CA  PRO A  14     155.865 118.421 156.321  1.00  0.00         0 C  
ATOM    190  C   PRO A  14     157.050 117.441 156.202  1.00  0.00         0 C  
ATOM    191  O   PRO A  14     156.881 116.236 156.326  1.00  0.00         0 O  
ATOM    192  CB  PRO A  14     154.980 118.439 155.066  1.00  0.00         0 C  
ATOM    193  CG  PRO A  14     155.584 119.538 154.222  1.00  0.00           C  
ATOM    194  CD  PRO A  14     156.154 120.486 155.268  1.00  0.00           C  
ATOM    195  HA  PRO A  14     155.258 118.106 157.174  1.00  0.00           H  
ATOM    196  HB1 PRO A  14     154.935 117.481 154.552  1.00  0.00           H  
ATOM    197  HB2 PRO A  14     153.962 118.712 155.344  1.00  0.00           H  
ATOM    198  HG2 PRO A  14     156.381 119.129 153.602  1.00  0.00           H  
ATOM    199  HG3 PRO A  14     154.868 120.017 153.559  1.00  0.00           H  
ATOM    200  HD2 PRO A  14     157.099 120.905 154.998  1.00  0.00           H  
ATOM    201  HD3 PRO A  14     155.419 121.260 155.455  1.00  0.00           H  
ATOM    202  N   SER A  15     158.253 118.013 156.058  1.00  0.00         0 N  
ATOM    203  CA  SER A  15     159.508 117.386 156.241  1.00  0.00         0 C  
ATOM    204  C   SER A  15     160.199 117.442 157.586  1.00  0.00         0 C  
ATOM    205  O   SER A  15     161.153 116.694 157.795  1.00  0.00         0 O  
ATOM    206  CB  SER A  15     160.437 117.856 155.094  1.00  0.00         0 C  
ATOM    207  OG  SER A  15     161.256 116.815 154.621  1.00  0.00           O  
ATOM    208  H   SER A  15     158.288 118.996 155.814  1.00  0.00         0 H  
ATOM    209  HA  SER A  15     159.345 116.319 156.072  1.00  0.00           H  
ATOM    210  HB2 SER A  15     159.860 118.174 154.225  1.00  0.00           H  
ATOM    211  HB3 SER A  15     161.073 118.688 155.398  1.00  0.00           H  
ATOM    212  HG  SER A  15     161.759 117.149 153.886  1.00  0.00           H  
ATOM    213  N   SER A  16     159.759 118.291 158.506  1.00  0.00         0 N  
ATOM    214  CA  SER A  16     160.421 118.432 159.766  1.00  0.00         0 C  
ATOM    215  C   SER A  16     159.526 119.176 160.750  1.00  0.00         0 C  
ATOM    216  O   SER A  16     158.367 118.818 160.958  1.00  0.00         0 O  
ATOM    217  CB  SER A  16     161.842 119.051 159.548  1.00  0.00           C  
ATOM    218  OG  SER A  16     162.602 119.080 160.734  1.00  0.00           O  
ATOM    219  H   SER A  16     158.839 118.717 158.423  1.00  0.00         0 H  
ATOM    220  HB2 SER A  16     162.437 118.487 158.831  1.00  0.00           H  
ATOM    221  HB3 SER A  16     161.775 120.063 159.151  1.00  0.00           H  
ATOM    222  HG  SER A  16     163.502 119.288 160.508  1.00  0.00           H  
ATOM    223  HA  SER A  16     160.547 117.436 160.197  1.00  0.00           H  
ATOM    224  N   LEU A  17     160.082 120.204 161.379  1.00  0.00         0 N  
ATOM    225  CA  LEU A  17     159.417 121.016 162.347  1.00  0.00         0 C  
ATOM    226  C   LEU A  17     159.127 122.393 161.813  1.00  0.00         0 C  
ATOM    227  O   LEU A  17     160.036 123.192 161.601  1.00  0.00         0 O  
ATOM    228  CB  LEU A  17     160.299 121.153 163.616  1.00  0.00         0 C  
ATOM    229  CG  LEU A  17     159.726 122.069 164.739  1.00  0.00           C  
ATOM    230  CD1 LEU A  17     158.402 121.548 165.322  1.00  0.00           C  
ATOM    231  CD2 LEU A  17     160.760 122.290 165.851  1.00  0.00           C  
ATOM    232  H   LEU A  17     161.058 120.399 161.182  1.00  0.00         0 H  
ATOM    233  HA  LEU A  17     158.488 120.539 162.665  1.00  0.00           H  
ATOM    234  HB2 LEU A  17     160.486 120.161 164.029  1.00  0.00           H  
ATOM    235  HB3 LEU A  17     161.279 121.536 163.324  1.00  0.00           H  
ATOM    236  HG  LEU A  17     159.531 123.064 164.336  1.00  0.00           H  
ATOM    237 HD11 LEU A  17     158.045 122.196 166.123  1.00  0.00           H  
ATOM    238 HD12 LEU A  17     157.613 121.514 164.572  1.00  0.00           H  
ATOM    239 HD13 LEU A  17     158.520 120.547 165.737  1.00  0.00           H  
ATOM    240 HD21 LEU A  17     160.377 122.969 166.614  1.00  0.00           H  
ATOM    241 HD22 LEU A  17     161.033 121.355 166.340  1.00  0.00           H  
ATOM    242 HD23 LEU A  17     161.672 122.738 165.453  1.00  0.00           H  
ATOM    243  N   LEU A  18     157.823 122.637 161.710  1.00  0.00         0 N  
ATOM    244  CA  LEU A  18     157.113 123.798 161.206  1.00  0.00         0 C  
ATOM    245  C   LEU A  18     155.859 123.299 160.510  1.00  0.00         0 C  
ATOM    246  O   LEU A  18     154.881 124.020 160.387  1.00  0.00         0 O  
ATOM    247  CB  LEU A  18     157.952 124.598 160.201  1.00  0.00         0 C  
ATOM    248  CG  LEU A  18     157.248 125.760 159.510  1.00  0.00           C  
ATOM    249  CD1 LEU A  18     156.802 126.822 160.512  1.00  0.00           C  
ATOM    250  CD2 LEU A  18     158.212 126.286 158.475  1.00  0.00           C  
ATOM    251  H   LEU A  18     157.229 121.897 162.048  1.00  0.00         0 H  
ATOM    252  HA  LEU A  18     156.832 124.430 162.043  1.00  0.00           H  
ATOM    253  HB2 LEU A  18     158.805 125.034 160.720  1.00  0.00           H  
ATOM    254  HB3 LEU A  18     158.375 123.929 159.453  1.00  0.00           H  
ATOM    255  HG  LEU A  18     156.368 125.451 158.950  1.00  0.00           H  
ATOM    256 HD11 LEU A  18     156.872 127.805 160.062  1.00  0.00           H  
ATOM    257 HD12 LEU A  18     155.771 126.661 160.827  1.00  0.00           H  
ATOM    258 HD13 LEU A  18     157.422 126.837 161.408  1.00  0.00           H  
ATOM    259 HD21 LEU A  18     157.828 127.200 158.055  1.00  0.00           H  
ATOM    260 HD22 LEU A  18     159.207 126.428 158.887  1.00  0.00           H  
ATOM    261 HD23 LEU A  18     158.328 125.578 157.672  1.00  0.00           H  
ATOM    262  N   GLY A  19     155.892 122.062 160.018  1.00  0.00         0 N  
ATOM    263  CA  GLY A  19     155.059 121.602 158.902  1.00  0.00         0 C  
ATOM    264  C   GLY A  19     153.779 121.263 159.644  1.00  0.00         0 C  
ATOM    265  O   GLY A  19     152.736 121.864 159.428  1.00  0.00         0 O  
ATOM    266  H   GLY A  19     156.734 121.535 160.201  1.00  0.00         0 H  
ATOM    267  HA3 GLY A  19     154.961 120.600 158.524  1.00  0.00           H  
ATOM    268  HA2 GLY A  19     154.634 122.363 158.277  1.00  0.00           H  
ATOM    269  N   ILE A  20     153.940 120.440 160.679  1.00  0.00         0 N  
ATOM    270  CA  ILE A  20     153.034 120.185 161.772  1.00  0.00         0 C  
ATOM    271  C   ILE A  20     152.475 121.381 162.531  1.00  0.00         0 C  
ATOM    272  O   ILE A  20     151.680 121.205 163.450  1.00  0.00         0 O  
ATOM    273  CB  ILE A  20     153.754 119.198 162.735  1.00  0.00         0 C  
ATOM    274  CG1 ILE A  20     155.045 119.788 163.368  1.00  0.00           C  
ATOM    275  CG2 ILE A  20     154.046 117.852 162.041  1.00  0.00           C  
ATOM    276  CD1 ILE A  20     155.527 119.007 164.596  1.00  0.00           C  
ATOM    277  H   ILE A  20     154.843 120.004 160.771  1.00  0.00         0 H  
ATOM    278  HA  ILE A  20     152.163 119.684 161.346  1.00  0.00           H  
ATOM    279  HB3 ILE A  20     153.056 118.983 163.547  1.00  0.00           H  
ATOM    280 HG12 ILE A  20     155.847 119.832 162.630  1.00  0.00           H  
ATOM    281 HG13 ILE A  20     154.874 120.814 163.689  1.00  0.00           H  
ATOM    282 HG21 ILE A  20     154.372 117.097 162.756  1.00  0.00           H  
ATOM    283 HG22 ILE A  20     153.154 117.459 161.552  1.00  0.00           H  
ATOM    284 HG23 ILE A  20     154.827 117.938 161.284  1.00  0.00           H  
ATOM    285 HD11 ILE A  20     156.391 119.486 165.053  1.00  0.00           H  
ATOM    286 HD12 ILE A  20     154.747 118.950 165.357  1.00  0.00           H  
ATOM    287 HD13 ILE A  20     155.819 117.989 164.340  1.00  0.00           H  
ATOM    288  N   LEU A  21     152.920 122.577 162.166  1.00  0.00         0 N  
ATOM    289  CA  LEU A  21     152.415 123.811 162.674  1.00  0.00         0 C  
ATOM    290  C   LEU A  21     151.635 124.511 161.582  1.00  0.00         0 C  
ATOM    291  O   LEU A  21     150.429 124.732 161.711  1.00  0.00         0 O  
ATOM    292  CB  LEU A  21     153.562 124.701 163.236  1.00  0.00         0 C  
ATOM    293  CG  LEU A  21     154.627 123.985 164.106  1.00  0.00           C  
ATOM    294  CD1 LEU A  21     155.711 124.971 164.571  1.00  0.00           C  
ATOM    295  CD2 LEU A  21     154.032 123.272 165.332  1.00  0.00           C  
ATOM    296  H   LEU A  21     153.468 122.625 161.318  1.00  0.00         0 H  
ATOM    297  HA  LEU A  21     151.717 123.637 163.496  1.00  0.00           H  
ATOM    298  HB2 LEU A  21     154.079 125.219 162.429  1.00  0.00           H  
ATOM    299  HB3 LEU A  21     153.107 125.501 163.823  1.00  0.00           H  
ATOM    300  HG  LEU A  21     155.121 123.233 163.491  1.00  0.00           H  
ATOM    301 HD11 LEU A  21     156.553 124.446 165.024  1.00  0.00           H  
ATOM    302 HD12 LEU A  21     156.100 125.576 163.753  1.00  0.00           H  
ATOM    303 HD13 LEU A  21     155.318 125.665 165.315  1.00  0.00           H  
ATOM    304 HD21 LEU A  21     154.810 122.777 165.914  1.00  0.00           H  
ATOM    305 HD22 LEU A  21     153.524 123.976 165.993  1.00  0.00           H  
ATOM    306 HD23 LEU A  21     153.309 122.507 165.057  1.00  0.00           H  
ATOM    307  N   LEU A  22     152.334 124.831 160.490  1.00  0.00         0 N  
ATOM    308  CA  LEU A  22     151.778 125.535 159.362  1.00  0.00         0 C  
ATOM    309  C   LEU A  22     150.667 124.812 158.616  1.00  0.00         0 C  
ATOM    310  O   LEU A  22     149.790 125.451 158.037  1.00  0.00         0 O  
ATOM    311  CB  LEU A  22     152.855 126.290 158.539  1.00  0.00         0 C  
ATOM    312  CG  LEU A  22     153.199 125.835 157.113  1.00  0.00           C  
ATOM    313  CD1 LEU A  22     154.204 126.812 156.492  1.00  0.00           C  
ATOM    314  CD2 LEU A  22     153.805 124.445 157.128  1.00  0.00           C  
ATOM    315  H   LEU A  22     153.317 124.566 160.440  1.00  0.00         0 H  
ATOM    316  HA  LEU A  22     151.228 126.352 159.835  1.00  0.00           H  
ATOM    317  HB2 LEU A  22     152.508 127.322 158.452  1.00  0.00           H  
ATOM    318  HB3 LEU A  22     153.772 126.367 159.124  1.00  0.00           H  
ATOM    319  HG  LEU A  22     152.301 125.832 156.492  1.00  0.00           H  
ATOM    320 HD11 LEU A  22     155.104 126.899 157.102  1.00  0.00           H  
ATOM    321 HD12 LEU A  22     154.513 126.488 155.500  1.00  0.00           H  
ATOM    322 HD13 LEU A  22     153.771 127.806 156.392  1.00  0.00           H  
ATOM    323 HD21 LEU A  22     154.233 124.178 156.170  1.00  0.00           H  
ATOM    324 HD22 LEU A  22     154.618 124.435 157.847  1.00  0.00           H  
ATOM    325 HD23 LEU A  22     153.071 123.686 157.395  1.00  0.00           H  
ATOM    326  N   ASP A  23     150.630 123.490 158.771  1.00  0.00         0 N  
ATOM    327  CA  ASP A  23     149.516 122.639 158.443  1.00  0.00         0 C  
ATOM    328  C   ASP A  23     148.134 123.103 158.871  1.00  0.00         0 C  
ATOM    329  O   ASP A  23     147.229 123.240 158.048  1.00  0.00         0 O  
ATOM    330  CB  ASP A  23     149.755 121.142 158.764  1.00  0.00         0 C  
ATOM    331  CG  ASP A  23     150.601 120.367 157.739  1.00  0.00           C  
ATOM    332  OD1 ASP A  23     151.254 120.995 156.878  1.00  0.00           O1-
ATOM    333  OD2 ASP A  23     150.568 119.120 157.831  1.00  0.00           O  
ATOM    334  H   ASP A  23     151.439 123.033 159.187  1.00  0.00         0 H  
ATOM    335  HA  ASP A  23     149.451 122.709 157.354  1.00  0.00           H  
ATOM    336  HB2 ASP A  23     150.205 121.031 159.750  1.00  0.00           H  
ATOM    337  HB3 ASP A  23     148.798 120.623 158.817  1.00  0.00           H  
ATOM    338  N   ILE A  24     147.970 123.350 160.165  1.00  0.00         0 N  
ATOM    339  CA  ILE A  24     146.663 123.589 160.746  1.00  0.00         0 C  
ATOM    340  C   ILE A  24     146.092 124.928 160.307  1.00  0.00         0 C  
ATOM    341  O   ILE A  24     144.915 125.036 159.962  1.00  0.00         0 O  
ATOM    342  CB  ILE A  24     146.774 123.503 162.298  1.00  0.00         0 C  
ATOM    343  CG1 ILE A  24     147.263 122.109 162.768  1.00  0.00           C  
ATOM    344  CG2 ILE A  24     145.440 123.828 163.009  1.00  0.00           C  
ATOM    345  CD1 ILE A  24     148.786 121.953 162.866  1.00  0.00           C  
ATOM    346  H   ILE A  24     148.776 123.310 160.775  1.00  0.00         0 H  
ATOM    347  HA  ILE A  24     145.978 122.812 160.399  1.00  0.00           H  
ATOM    348  HB3 ILE A  24     147.492 124.251 162.641  1.00  0.00           H  
ATOM    349 HG12 ILE A  24     146.873 121.906 163.766  1.00  0.00           H  
ATOM    350 HG13 ILE A  24     146.847 121.325 162.134  1.00  0.00           H  
ATOM    351 HG21 ILE A  24     145.533 123.730 164.091  1.00  0.00           H  
ATOM    352 HG22 ILE A  24     145.107 124.851 162.827  1.00  0.00           H  
ATOM    353 HG23 ILE A  24     144.644 123.158 162.683  1.00  0.00           H  
ATOM    354 HD11 ILE A  24     149.034 120.998 163.331  1.00  0.00           H  
ATOM    355 HD12 ILE A  24     149.283 121.965 161.899  1.00  0.00           H  
ATOM    356 HD13 ILE A  24     149.230 122.735 163.482  1.00  0.00           H  
ATOM    357  N   ILE A  25     146.982 125.913 160.266  1.00  0.00         0 N  
ATOM    358  CA  ILE A  25     146.745 127.254 159.793  1.00  0.00         0 C  
ATOM    359  C   ILE A  25     146.334 127.252 158.321  1.00  0.00         0 C  
ATOM    360  O   ILE A  25     145.419 127.971 157.917  1.00  0.00         0 O  
ATOM    361  CB  ILE A  25     148.062 128.068 160.015  1.00  0.00           C  
ATOM    362  CG1 ILE A  25     148.459 128.109 161.515  1.00  0.00           C  
ATOM    363  CG2 ILE A  25     148.002 129.496 159.430  1.00  0.00           C  
ATOM    364  CD1 ILE A  25     149.844 128.710 161.802  1.00  0.00           C  
ATOM    365  H   ILE A  25     147.933 125.671 160.507  1.00  0.00         0 H  
ATOM    366  HB  ILE A  25     148.864 127.554 159.480  1.00  0.00           H  
ATOM    367 HG12 ILE A  25     147.702 128.658 162.078  1.00  0.00           H  
ATOM    368 HG13 ILE A  25     148.463 127.104 161.937  1.00  0.00           H  
ATOM    369 HG21 ILE A  25     148.944 130.026 159.562  1.00  0.00           H  
ATOM    370 HG22 ILE A  25     147.823 129.498 158.354  1.00  0.00           H  
ATOM    371 HG23 ILE A  25     147.215 130.085 159.901  1.00  0.00           H  
ATOM    372 HD11 ILE A  25     150.092 128.601 162.858  1.00  0.00           H  
ATOM    373 HD12 ILE A  25     150.624 128.211 161.228  1.00  0.00           H  
ATOM    374 HD13 ILE A  25     149.883 129.776 161.577  1.00  0.00           H  
ATOM    375  HA  ILE A  25     145.964 127.713 160.396  1.00  0.00           H  
ATOM    376  N   SER A  26     146.980 126.393 157.538  1.00  0.00         0 N  
ATOM    377  CA  SER A  26     146.636 126.197 156.157  1.00  0.00         0 C  
ATOM    378  C   SER A  26     145.274 125.572 155.931  1.00  0.00         0 C  
ATOM    379  O   SER A  26     144.499 126.046 155.100  1.00  0.00         0 O  
ATOM    380  CB  SER A  26     147.741 125.373 155.440  1.00  0.00           C  
ATOM    381  OG  SER A  26     148.736 126.242 154.926  1.00  0.00           O  
ATOM    382  H   SER A  26     147.799 125.905 157.884  1.00  0.00         0 H  
ATOM    383  HB2 SER A  26     148.194 124.632 156.097  1.00  0.00           H  
ATOM    384  HB3 SER A  26     147.336 124.818 154.592  1.00  0.00           H  
ATOM    385  HG  SER A  26     149.515 125.746 154.690  1.00  0.00           H  
ATOM    386  HA  SER A  26     146.589 127.175 155.678  1.00  0.00           H  
ATOM    387  N   TYR A  27     144.956 124.543 156.710  1.00  0.00         0 N  
ATOM    388  CA  TYR A  27     143.695 123.848 156.583  1.00  0.00         0 C  
ATOM    389  C   TYR A  27     142.514 124.684 157.034  1.00  0.00         0 C  
ATOM    390  O   TYR A  27     141.462 124.639 156.397  1.00  0.00         0 O  
ATOM    391  CB  TYR A  27     143.747 122.546 157.415  1.00  0.00           C  
ATOM    392  CG  TYR A  27     144.798 121.513 157.014  1.00  0.00           C  
ATOM    393  CD1 TYR A  27     145.228 121.372 155.674  1.00  0.00           C  
ATOM    394  CD2 TYR A  27     145.354 120.673 158.003  1.00  0.00           C  
ATOM    395  CE1 TYR A  27     146.218 120.430 155.338  1.00  0.00           C  
ATOM    396  CE2 TYR A  27     146.345 119.729 157.666  1.00  0.00           C  
ATOM    397  CZ  TYR A  27     146.786 119.615 156.333  1.00  0.00           C  
ATOM    398  OH  TYR A  27     147.759 118.720 155.994  1.00  0.00           O  
ATOM    399  H   TYR A  27     145.663 124.167 157.339  1.00  0.00         0 H  
ATOM    400  HB2 TYR A  27     143.897 122.798 158.466  1.00  0.00           H  
ATOM    401  HB3 TYR A  27     142.778 122.048 157.365  1.00  0.00           H  
ATOM    402  HD1 TYR A  27     144.820 121.985 154.885  1.00  0.00           H  
ATOM    403  HD2 TYR A  27     145.033 120.756 159.031  1.00  0.00           H  
ATOM    404  HE1 TYR A  27     146.547 120.343 154.315  1.00  0.00           H  
ATOM    405  HE2 TYR A  27     146.762 119.101 158.440  1.00  0.00           H  
ATOM    406  HH  TYR A  27     148.199 118.351 156.751  1.00  0.00           H  
ATOM    407  HA  TYR A  27     143.521 123.604 155.534  1.00  0.00           H  
ATOM    408  N   VAL A  28     142.700 125.497 158.078  1.00  0.00         0 N  
ATOM    409  CA  VAL A  28     141.687 126.461 158.449  1.00  0.00         0 C  
ATOM    410  C   VAL A  28     141.565 127.606 157.449  1.00  0.00         0 C  
ATOM    411  O   VAL A  28     140.467 128.090 157.170  1.00  0.00         0 O  
ATOM    412  CB  VAL A  28     141.875 126.947 159.915  1.00  0.00           C  
ATOM    413  CG1 VAL A  28     143.096 127.837 160.154  1.00  0.00           C  
ATOM    414  CG2 VAL A  28     140.624 127.652 160.459  1.00  0.00           C  
ATOM    415  H   VAL A  28     143.577 125.472 158.592  1.00  0.00         0 H  
ATOM    416  HB  VAL A  28     142.011 126.053 160.526  1.00  0.00           H  
ATOM    417 HG11 VAL A  28     143.240 128.048 161.214  1.00  0.00           H  
ATOM    418 HG12 VAL A  28     143.972 127.317 159.806  1.00  0.00           H  
ATOM    419 HG13 VAL A  28     143.035 128.789 159.626  1.00  0.00           H  
ATOM    420 HG21 VAL A  28     140.726 127.877 161.521  1.00  0.00           H  
ATOM    421 HG22 VAL A  28     140.459 128.593 159.937  1.00  0.00           H  
ATOM    422 HG23 VAL A  28     139.730 127.040 160.336  1.00  0.00           H  
ATOM    423  HA  VAL A  28     140.726 125.941 158.428  1.00  0.00           H  
ATOM    424  N   GLY A  29     142.698 127.974 156.859  1.00  0.00         0 N  
ATOM    425  CA  GLY A  29     142.789 129.009 155.872  1.00  0.00         0 C  
ATOM    426  C   GLY A  29     142.044 128.708 154.595  1.00  0.00         0 C  
ATOM    427  O   GLY A  29     141.106 129.419 154.232  1.00  0.00         0 O  
ATOM    428  H   GLY A  29     143.569 127.558 157.170  1.00  0.00         0 H  
ATOM    429  HA3 GLY A  29     143.839 129.190 155.642  1.00  0.00           H  
ATOM    430  HA2 GLY A  29     142.396 129.937 156.288  1.00  0.00           H  
ATOM    431  N   VAL A  30     142.394 127.579 153.981  1.00  0.00         0 N  
ATOM    432  CA  VAL A  30     141.701 127.041 152.824  1.00  0.00         0 C  
ATOM    433  C   VAL A  30     140.262 126.632 153.141  1.00  0.00         0 C  
ATOM    434  O   VAL A  30     139.395 126.620 152.271  1.00  0.00         0 O  
ATOM    435  CB  VAL A  30     142.557 125.897 152.207  1.00  0.00         0 C  
ATOM    436  CG1 VAL A  30     141.905 125.293 150.954  1.00  0.00           C  
ATOM    437  CG2 VAL A  30     143.973 126.385 151.820  1.00  0.00           C  
ATOM    438  H   VAL A  30     143.158 127.030 154.373  1.00  0.00         0 H  
ATOM    439  HA  VAL A  30     141.658 127.845 152.096  1.00  0.00           H  
ATOM    440  HB3 VAL A  30     142.666 125.103 152.947  1.00  0.00           H  
ATOM    441 HG11 VAL A  30     142.584 124.628 150.419  1.00  0.00           H  
ATOM    442 HG12 VAL A  30     141.008 124.720 151.191  1.00  0.00           H  
ATOM    443 HG13 VAL A  30     141.618 126.095 150.278  1.00  0.00           H  
ATOM    444 HG21 VAL A  30     144.571 125.575 151.403  1.00  0.00           H  
ATOM    445 HG22 VAL A  30     143.929 127.176 151.070  1.00  0.00           H  
ATOM    446 HG23 VAL A  30     144.530 126.778 152.668  1.00  0.00           H  
ATOM    447  N   GLY A  31     139.993 126.398 154.419  1.00  0.00         0 N  
ATOM    448  CA  GLY A  31     138.674 126.208 154.942  1.00  0.00         0 C  
ATOM    449  C   GLY A  31     137.736 127.380 154.734  1.00  0.00         0 C  
ATOM    450  O   GLY A  31     136.729 127.275 154.031  1.00  0.00         0 O  
ATOM    451  H   GLY A  31     140.760 126.405 155.077  1.00  0.00         0 H  
ATOM    452  HA3 GLY A  31     138.750 126.004 156.010  1.00  0.00           H  
ATOM    453  HA2 GLY A  31     138.236 125.317 154.490  1.00  0.00           H  
ATOM    454  N   PHE A  32     138.109 128.525 155.301  1.00  0.00         0 N  
ATOM    455  CA  PHE A  32     137.346 129.750 155.141  1.00  0.00         0 C  
ATOM    456  C   PHE A  32     137.492 130.348 153.767  1.00  0.00         0 C  
ATOM    457  O   PHE A  32     136.611 131.107 153.371  1.00  0.00         0 O  
ATOM    458  CB  PHE A  32     137.794 130.774 156.204  1.00  0.00         0 C  
ATOM    459  CG  PHE A  32     137.452 130.375 157.633  1.00  0.00           C  
ATOM    460  CD1 PHE A  32     136.137 129.983 157.971  1.00  0.00           C  
ATOM    461  CD2 PHE A  32     138.446 130.399 158.634  1.00  0.00           C  
ATOM    462  CE1 PHE A  32     135.826 129.589 159.286  1.00  0.00           C  
ATOM    463  CE2 PHE A  32     138.126 130.032 159.956  1.00  0.00           C  
ATOM    464  CZ  PHE A  32     136.822 129.613 160.280  1.00  0.00           C  
ATOM    465  H   PHE A  32     138.956 128.542 155.864  1.00  0.00         0 H  
ATOM    466  HA  PHE A  32     136.286 129.529 155.269  1.00  0.00           H  
ATOM    467  HB2 PHE A  32     138.868 130.954 156.118  1.00  0.00           H  
ATOM    468  HB3 PHE A  32     137.314 131.737 156.020  1.00  0.00           H  
ATOM    469  HD1 PHE A  32     135.353 129.974 157.229  1.00  0.00           H  
ATOM    470  HD2 PHE A  32     139.458 130.696 158.395  1.00  0.00           H  
ATOM    471  HE1 PHE A  32     134.822 129.274 159.533  1.00  0.00           H  
ATOM    472  HE2 PHE A  32     138.883 130.061 160.726  1.00  0.00           H  
ATOM    473  HZ  PHE A  32     136.583 129.315 161.292  1.00  0.00           H  
ATOM    474  N   SER A  33     138.539 129.985 153.019  1.00  0.00         0 N  
ATOM    475  CA  SER A  33     138.662 130.400 151.649  1.00  0.00         0 C  
ATOM    476  C   SER A  33     137.525 129.906 150.775  1.00  0.00         0 C  
ATOM    477  O   SER A  33     136.881 130.700 150.095  1.00  0.00         0 O  
ATOM    478  CB  SER A  33     140.073 130.121 151.072  1.00  0.00           C  
ATOM    479  OG  SER A  33     140.213 128.888 150.399  1.00  0.00           O  
ATOM    480  H   SER A  33     139.268 129.403 153.420  1.00  0.00         0 H  
ATOM    481  HB2 SER A  33     140.311 130.895 150.342  1.00  0.00           H  
ATOM    482  HB3 SER A  33     140.835 130.210 151.845  1.00  0.00           H  
ATOM    483  HG  SER A  33     141.139 128.721 150.275  1.00  0.00           H  
ATOM    484  HA  SER A  33     138.579 131.489 151.673  1.00  0.00           H  
ATOM    485  N   ILE A  34     137.215 128.619 150.874  1.00  0.00         0 N  
ATOM    486  CA  ILE A  34     136.178 128.010 150.079  1.00  0.00         0 C  
ATOM    487  C   ILE A  34     134.789 128.560 150.361  1.00  0.00         0 C  
ATOM    488  O   ILE A  34     134.043 128.908 149.444  1.00  0.00         0 O  
ATOM    489  CB  ILE A  34     136.250 126.463 150.253  1.00  0.00           C  
ATOM    490  CG1 ILE A  34     137.556 125.856 149.675  1.00  0.00           C  
ATOM    491  CG2 ILE A  34     135.022 125.691 149.716  1.00  0.00           C  
ATOM    492  CD1 ILE A  34     137.659 125.826 148.144  1.00  0.00           C  
ATOM    493  H   ILE A  34     137.828 128.020 151.420  1.00  0.00         0 H  
ATOM    494  HB  ILE A  34     136.276 126.266 151.327  1.00  0.00           H  
ATOM    495 HG12 ILE A  34     138.427 126.388 150.051  1.00  0.00           H  
ATOM    496 HG13 ILE A  34     137.657 124.836 150.048  1.00  0.00           H  
ATOM    497 HG21 ILE A  34     135.189 124.614 149.747  1.00  0.00           H  
ATOM    498 HG22 ILE A  34     134.128 125.885 150.308  1.00  0.00           H  
ATOM    499 HG23 ILE A  34     134.796 125.961 148.684  1.00  0.00           H  
ATOM    500 HD11 ILE A  34     138.506 125.213 147.843  1.00  0.00           H  
ATOM    501 HD12 ILE A  34     136.781 125.382 147.676  1.00  0.00           H  
ATOM    502 HD13 ILE A  34     137.806 126.824 147.732  1.00  0.00           H  
ATOM    503  HA  ILE A  34     136.384 128.239 149.032  1.00  0.00           H  
ATOM    504  N   LEU A  35     134.493 128.706 151.648  1.00  0.00         0 N  
ATOM    505  CA  LEU A  35     133.268 129.313 152.125  1.00  0.00         0 C  
ATOM    506  C   LEU A  35     133.183 130.787 151.740  1.00  0.00         0 C  
ATOM    507  O   LEU A  35     132.099 131.306 151.474  1.00  0.00         0 O  
ATOM    508  CB  LEU A  35     133.210 129.142 153.658  1.00  0.00         0 C  
ATOM    509  CG  LEU A  35     133.283 127.672 154.142  1.00  0.00           C  
ATOM    510  CD1 LEU A  35     133.430 127.603 155.668  1.00  0.00           C  
ATOM    511  CD2 LEU A  35     132.079 126.839 153.672  1.00  0.00           C  
ATOM    512  H   LEU A  35     135.179 128.395 152.326  1.00  0.00         0 H  
ATOM    513  HA  LEU A  35     132.418 128.808 151.663  1.00  0.00           H  
ATOM    514  HB2 LEU A  35     134.029 129.706 154.108  1.00  0.00           H  
ATOM    515  HB3 LEU A  35     132.295 129.600 154.037  1.00  0.00           H  
ATOM    516  HG  LEU A  35     134.175 127.201 153.730  1.00  0.00           H  
ATOM    517 HD11 LEU A  35     133.506 126.569 156.007  1.00  0.00           H  
ATOM    518 HD12 LEU A  35     134.333 128.115 156.001  1.00  0.00           H  
ATOM    519 HD13 LEU A  35     132.578 128.056 156.174  1.00  0.00           H  
ATOM    520 HD21 LEU A  35     132.132 125.820 154.058  1.00  0.00           H  
ATOM    521 HD22 LEU A  35     131.136 127.271 154.008  1.00  0.00           H  
ATOM    522 HD23 LEU A  35     132.042 126.758 152.585  1.00  0.00           H  
ATOM    523  N   SER A  36     134.346 131.431 151.639  1.00  0.00         0 N  
ATOM    524  CA  SER A  36     134.434 132.797 151.199  1.00  0.00         0 C  
ATOM    525  C   SER A  36     134.192 132.978 149.714  1.00  0.00         0 C  
ATOM    526  O   SER A  36     133.406 133.837 149.309  1.00  0.00         0 O  
ATOM    527  CB  SER A  36     135.778 133.475 151.557  1.00  0.00           C  
ATOM    528  OG  SER A  36     135.918 133.669 152.954  1.00  0.00           O  
ATOM    529  H   SER A  36     135.206 130.956 151.882  1.00  0.00         0 H  
ATOM    530  HB2 SER A  36     136.638 132.935 151.168  1.00  0.00           H  
ATOM    531  HB3 SER A  36     135.808 134.468 151.105  1.00  0.00           H  
ATOM    532  HG  SER A  36     136.073 132.801 153.327  1.00  0.00           H  
ATOM    533  HA  SER A  36     133.653 133.368 151.707  1.00  0.00           H  
ATOM    534  N   LEU A  37     134.826 132.133 148.904  1.00  0.00         0 N  
ATOM    535  CA  LEU A  37     134.626 132.132 147.475  1.00  0.00         0 C  
ATOM    536  C   LEU A  37     133.194 131.811 147.087  1.00  0.00         0 C  
ATOM    537  O   LEU A  37     132.642 132.436 146.186  1.00  0.00         0 O  
ATOM    538  CB  LEU A  37     135.596 131.140 146.770  1.00  0.00           C  
ATOM    539  CG  LEU A  37     136.996 131.667 146.363  1.00  0.00           C  
ATOM    540  CD1 LEU A  37     136.947 132.996 145.605  1.00  0.00           C  
ATOM    541  CD2 LEU A  37     137.996 131.744 147.515  1.00  0.00           C  
ATOM    542  H   LEU A  37     135.485 131.467 149.305  1.00  0.00         0 H  
ATOM    543  HB2 LEU A  37     135.701 130.231 147.365  1.00  0.00           H  
ATOM    544  HB3 LEU A  37     135.133 130.810 145.837  1.00  0.00           H  
ATOM    545  HG  LEU A  37     137.401 130.932 145.664  1.00  0.00           H  
ATOM    546 HD11 LEU A  37     137.907 133.210 145.140  1.00  0.00           H  
ATOM    547 HD12 LEU A  37     136.196 132.949 144.820  1.00  0.00           H  
ATOM    548 HD13 LEU A  37     136.714 133.840 146.254  1.00  0.00           H  
ATOM    549 HD21 LEU A  37     138.958 132.124 147.176  1.00  0.00           H  
ATOM    550 HD22 LEU A  37     137.635 132.407 148.302  1.00  0.00           H  
ATOM    551 HD23 LEU A  37     138.179 130.757 147.938  1.00  0.00           H  
ATOM    552  HA  LEU A  37     134.805 133.144 147.115  1.00  0.00           H  
ATOM    553  N   ALA A  38     132.573 130.902 147.834  1.00  0.00         0 N  
ATOM    554  CA  ALA A  38     131.183 130.563 147.672  1.00  0.00         0 C  
ATOM    555  C   ALA A  38     130.225 131.727 147.836  1.00  0.00         0 C  
ATOM    556  O   ALA A  38     129.374 131.965 146.982  1.00  0.00         0 O  
ATOM    557  CB  ALA A  38     130.827 129.431 148.646  1.00  0.00         0 C  
ATOM    558  H   ALA A  38     133.116 130.399 148.530  1.00  0.00         0 H  
ATOM    559  HA  ALA A  38     131.057 130.182 146.656  1.00  0.00           H  
ATOM    560  HB1 ALA A  38     129.788 129.122 148.524  1.00  0.00           H  
ATOM    561  HB2 ALA A  38     131.449 128.552 148.473  1.00  0.00           H  
ATOM    562  HB3 ALA A  38     130.960 129.730 149.686  1.00  0.00           H  
ATOM    563  N   ALA A  39     130.433 132.501 148.896  1.00  0.00         0 N  
ATOM    564  CA  ALA A  39     129.657 133.690 149.170  1.00  0.00         0 C  
ATOM    565  C   ALA A  39     129.882 134.801 148.153  1.00  0.00         0 C  
ATOM    566  O   ALA A  39     128.969 135.555 147.821  1.00  0.00         0 O  
ATOM    567  CB  ALA A  39     130.101 134.214 150.545  1.00  0.00         0 C  
ATOM    568  H   ALA A  39     131.168 132.243 149.544  1.00  0.00         0 H  
ATOM    569  HA  ALA A  39     128.619 133.415 149.304  1.00  0.00           H  
ATOM    570  HB1 ALA A  39     129.537 135.105 150.827  1.00  0.00           H  
ATOM    571  HB2 ALA A  39     129.935 133.468 151.323  1.00  0.00           H  
ATOM    572  HB3 ALA A  39     131.159 134.476 150.565  1.00  0.00           H  
ATOM    573  N   CYS A  40     131.108 134.859 147.641  1.00  0.00         0 N  
ATOM    574  CA  CYS A  40     131.502 135.777 146.603  1.00  0.00         0 C  
ATOM    575  C   CYS A  40     130.808 135.480 145.283  1.00  0.00         0 C  
ATOM    576  O   CYS A  40     130.249 136.369 144.642  1.00  0.00         0 O  
ATOM    577  CB  CYS A  40     133.043 135.736 146.456  1.00  0.00           C  
ATOM    578  SG  CYS A  40     133.675 137.242 145.661  1.00  0.00           S  
ATOM    579  H   CYS A  40     131.805 134.220 148.009  1.00  0.00         0 H  
ATOM    580  HB2 CYS A  40     133.518 135.676 147.436  1.00  0.00           H  
ATOM    581  HB3 CYS A  40     133.379 134.869 145.887  1.00  0.00           H  
ATOM    582  HG  CYS A  40     134.973 136.963 145.825  1.00  0.00           H  
ATOM    583  HA  CYS A  40     131.229 136.778 146.935  1.00  0.00           H  
ATOM    584  N   LEU A  41     130.780 134.201 144.923  1.00  0.00         0 N  
ATOM    585  CA  LEU A  41     130.109 133.732 143.735  1.00  0.00         0 C  
ATOM    586  C   LEU A  41     128.604 133.843 143.844  1.00  0.00         0 C  
ATOM    587  O   LEU A  41     127.971 134.210 142.854  1.00  0.00         0 O  
ATOM    588  CB  LEU A  41     130.599 132.305 143.420  1.00  0.00           C  
ATOM    589  CG  LEU A  41     132.104 132.254 143.028  1.00  0.00           C  
ATOM    590  CD1 LEU A  41     132.658 130.834 143.131  1.00  0.00           C  
ATOM    591  CD2 LEU A  41     132.384 132.843 141.639  1.00  0.00           C  
ATOM    592  H   LEU A  41     131.275 133.518 145.491  1.00  0.00         0 H  
ATOM    593  HB2 LEU A  41     130.421 131.672 144.291  1.00  0.00           H  
ATOM    594  HB3 LEU A  41     130.002 131.875 142.615  1.00  0.00           H  
ATOM    595  HG  LEU A  41     132.681 132.853 143.732  1.00  0.00           H  
ATOM    596 HD11 LEU A  41     133.726 130.804 142.910  1.00  0.00           H  
ATOM    597 HD12 LEU A  41     132.523 130.456 144.145  1.00  0.00           H  
ATOM    598 HD13 LEU A  41     132.152 130.155 142.444  1.00  0.00           H  
ATOM    599 HD21 LEU A  41     133.429 132.713 141.353  1.00  0.00           H  
ATOM    600 HD22 LEU A  41     131.770 132.377 140.869  1.00  0.00           H  
ATOM    601 HD23 LEU A  41     132.187 133.913 141.633  1.00  0.00           H  
ATOM    602  HA  LEU A  41     130.396 134.382 142.907  1.00  0.00           H  
ATOM    603  N   VAL A  42     128.036 133.635 145.040  1.00  0.00         0 N  
ATOM    604  CA  VAL A  42     126.629 133.919 145.220  1.00  0.00         0 C  
ATOM    605  C   VAL A  42     126.242 135.379 145.111  1.00  0.00         0 C  
ATOM    606  O   VAL A  42     125.287 135.690 144.400  1.00  0.00         0 O  
ATOM    607  CB  VAL A  42     125.922 133.197 146.392  1.00  0.00           C  
ATOM    608  CG1 VAL A  42     126.039 131.665 146.281  1.00  0.00           C  
ATOM    609  CG2 VAL A  42     126.345 133.689 147.762  1.00  0.00           C  
ATOM    610  H   VAL A  42     128.585 133.272 145.814  1.00  0.00         0 H  
ATOM    611  HB  VAL A  42     124.856 133.421 146.310  1.00  0.00           H  
ATOM    612 HG11 VAL A  42     125.507 131.169 147.092  1.00  0.00           H  
ATOM    613 HG12 VAL A  42     125.610 131.307 145.345  1.00  0.00           H  
ATOM    614 HG13 VAL A  42     127.072 131.325 146.313  1.00  0.00           H  
ATOM    615 HG21 VAL A  42     125.930 133.090 148.572  1.00  0.00           H  
ATOM    616 HG22 VAL A  42     127.412 133.595 147.764  1.00  0.00           H  
ATOM    617 HG23 VAL A  42     126.086 134.733 147.938  1.00  0.00           H  
ATOM    618  HA  VAL A  42     126.142 133.467 144.351  1.00  0.00           H  
ATOM    619  N   VAL A  43     126.983 136.277 145.760  1.00  0.00         0 N  
ATOM    620  CA  VAL A  43     126.620 137.677 145.699  1.00  0.00         0 C  
ATOM    621  C   VAL A  43     126.813 138.275 144.309  1.00  0.00         0 C  
ATOM    622  O   VAL A  43     125.999 139.074 143.849  1.00  0.00         0 O  
ATOM    623  CB  VAL A  43     127.336 138.489 146.816  1.00  0.00         0 C  
ATOM    624  CG1 VAL A  43     128.853 138.664 146.641  1.00  0.00           C  
ATOM    625  CG2 VAL A  43     126.675 139.862 147.037  1.00  0.00           C  
ATOM    626  H   VAL A  43     127.764 135.985 146.341  1.00  0.00         0 H  
ATOM    627  HA  VAL A  43     125.550 137.737 145.913  1.00  0.00           H  
ATOM    628  HB3 VAL A  43     127.193 137.935 147.746  1.00  0.00           H  
ATOM    629 HG11 VAL A  43     129.299 139.144 147.513  1.00  0.00           H  
ATOM    630 HG12 VAL A  43     129.331 137.701 146.528  1.00  0.00           H  
ATOM    631 HG13 VAL A  43     129.105 139.269 145.769  1.00  0.00           H  
ATOM    632 HG21 VAL A  43     127.120 140.380 147.888  1.00  0.00           H  
ATOM    633 HG22 VAL A  43     126.783 140.510 146.166  1.00  0.00           H  
ATOM    634 HG23 VAL A  43     125.609 139.760 147.243  1.00  0.00           H  
ATOM    635  N   GLU A  44     127.835 137.798 143.604  1.00  0.00         0 N  
ATOM    636  CA  GLU A  44     128.069 138.171 142.235  1.00  0.00         0 C  
ATOM    637  C   GLU A  44     126.996 137.682 141.277  1.00  0.00         0 C  
ATOM    638  O   GLU A  44     126.581 138.405 140.373  1.00  0.00         0 O  
ATOM    639  CB  GLU A  44     129.472 137.643 141.822  1.00  0.00           C  
ATOM    640  CG  GLU A  44     129.929 137.870 140.357  1.00  0.00           C  
ATOM    641  CD  GLU A  44     130.055 139.340 139.938  1.00  0.00           C  
ATOM    642  OE1 GLU A  44     130.147 140.209 140.828  1.00  0.00           O1-
ATOM    643  OE2 GLU A  44     130.078 139.582 138.711  1.00  0.00           O  
ATOM    644  H   GLU A  44     128.492 137.165 144.050  1.00  0.00         0 H  
ATOM    645  HB2 GLU A  44     130.220 138.077 142.488  1.00  0.00           H  
ATOM    646  HB3 GLU A  44     129.511 136.569 142.010  1.00  0.00           H  
ATOM    647  HG2 GLU A  44     130.908 137.412 140.220  1.00  0.00           H  
ATOM    648  HG3 GLU A  44     129.263 137.360 139.661  1.00  0.00           H  
ATOM    649  HA  GLU A  44     128.079 139.262 142.181  1.00  0.00           H  
ATOM    650  N   ALA A  45     126.513 136.465 141.516  1.00  0.00         0 N  
ATOM    651  CA  ALA A  45     125.473 135.870 140.714  1.00  0.00         0 C  
ATOM    652  C   ALA A  45     124.129 136.566 140.832  1.00  0.00         0 C  
ATOM    653  O   ALA A  45     123.376 136.644 139.863  1.00  0.00         0 O  
ATOM    654  CB  ALA A  45     125.309 134.396 141.111  1.00  0.00         0 C  
ATOM    655  H   ALA A  45     126.923 135.911 142.259  1.00  0.00         0 H  
ATOM    656  HA  ALA A  45     125.778 135.913 139.666  1.00  0.00           H  
ATOM    657  HB1 ALA A  45     124.522 133.917 140.527  1.00  0.00           H  
ATOM    658  HB2 ALA A  45     126.226 133.836 140.927  1.00  0.00           H  
ATOM    659  HB3 ALA A  45     125.051 134.281 142.164  1.00  0.00           H  
ATOM    660  N   VAL A  46     123.856 137.099 142.019  1.00  0.00         0 N  
ATOM    661  CA  VAL A  46     122.666 137.870 142.284  1.00  0.00         0 C  
ATOM    662  C   VAL A  46     122.668 139.213 141.570  1.00  0.00         0 C  
ATOM    663  O   VAL A  46     121.632 139.649 141.073  1.00  0.00         0 O  
ATOM    664  CB  VAL A  46     122.513 138.021 143.830  1.00  0.00         0 C  
ATOM    665  CG1 VAL A  46     121.426 139.020 144.283  1.00  0.00           C  
ATOM    666  CG2 VAL A  46     122.210 136.663 144.493  1.00  0.00           C  
ATOM    667  H   VAL A  46     124.517 136.948 142.773  1.00  0.00         0 H  
ATOM    668  HA  VAL A  46     121.802 137.316 141.909  1.00  0.00           H  
ATOM    669  HB3 VAL A  46     123.462 138.378 144.231  1.00  0.00           H  
ATOM    670 HG11 VAL A  46     121.349 139.049 145.370  1.00  0.00           H  
ATOM    671 HG12 VAL A  46     121.632 140.039 143.959  1.00  0.00           H  
ATOM    672 HG13 VAL A  46     120.447 138.744 143.890  1.00  0.00           H  
ATOM    673 HG21 VAL A  46     122.310 136.724 145.577  1.00  0.00           H  
ATOM    674 HG22 VAL A  46     121.192 136.338 144.273  1.00  0.00           H  
ATOM    675 HG23 VAL A  46     122.867 135.868 144.150  1.00  0.00           H  
ATOM    676  N   VAL A  47     123.831 139.854 141.516  1.00  0.00         0 N  
ATOM    677  CA  VAL A  47     123.942 141.242 141.121  1.00  0.00         0 C  
ATOM    678  C   VAL A  47     124.265 141.314 139.620  1.00  0.00         0 C  
ATOM    679  O   VAL A  47     125.054 140.527 139.098  1.00  0.00         0 O  
ATOM    680  CB  VAL A  47     124.951 141.994 142.027  1.00  0.00         0 C  
ATOM    681  CG1 VAL A  47     124.468 141.925 143.477  1.00  0.00           C  
ATOM    682  CG2 VAL A  47     126.362 141.396 141.945  1.00  0.00           C  
ATOM    683  H   VAL A  47     124.649 139.414 141.922  1.00  0.00         0 H  
ATOM    684  HA  VAL A  47     123.044 141.780 141.425  1.00  0.00           H  
ATOM    685  HB3 VAL A  47     125.027 143.032 141.703  1.00  0.00           H  
ATOM    686 HG11 VAL A  47     125.172 142.451 144.121  1.00  0.00           H  
ATOM    687 HG12 VAL A  47     123.486 142.391 143.555  1.00  0.00           H  
ATOM    688 HG13 VAL A  47     124.400 140.882 143.788  1.00  0.00           H  
ATOM    689 HG21 VAL A  47     127.033 141.956 142.597  1.00  0.00           H  
ATOM    690 HG22 VAL A  47     126.335 140.353 142.263  1.00  0.00           H  
ATOM    691 HG23 VAL A  47     126.723 141.452 140.918  1.00  0.00           H  
ATOM    692  N   TRP A  48     123.645 142.270 138.933  1.00  0.00         0 N  
ATOM    693  CA  TRP A  48     123.839 142.475 137.504  1.00  0.00         0 C  
ATOM    694  C   TRP A  48     124.022 143.973 137.214  1.00  0.00         0 C  
ATOM    695  O   TRP A  48     123.056 144.696 136.968  1.00  0.00         0 O  
ATOM    696  CB  TRP A  48     122.658 141.847 136.747  1.00  0.00           C  
ATOM    697  CG  TRP A  48     122.670 141.951 135.253  1.00  0.00           C  
ATOM    698  CD1 TRP A  48     121.832 142.717 134.517  1.00  0.00           C  
ATOM    699  CD2 TRP A  48     123.550 141.279 134.302  1.00  0.00           C  
ATOM    700  NE1 TRP A  48     122.132 142.558 133.177  1.00  0.00           N  
ATOM    701  CE2 TRP A  48     123.180 141.682 132.988  1.00  0.00           C  
ATOM    702  CE3 TRP A  48     124.625 140.375 134.414  1.00  0.00           C  
ATOM    703  CZ2 TRP A  48     123.836 141.206 131.843  1.00  0.00           C  
ATOM    704  CZ3 TRP A  48     125.291 139.887 133.275  1.00  0.00           C  
ATOM    705  CH2 TRP A  48     124.899 140.299 131.990  1.00  0.00           C  
ATOM    706  H   TRP A  48     123.005 142.895 139.403  1.00  0.00         0 H  
ATOM    707  HB2 TRP A  48     122.613 140.779 136.963  1.00  0.00           H  
ATOM    708  HB3 TRP A  48     121.729 142.320 137.064  1.00  0.00           H  
ATOM    709  HD1 TRP A  48     121.082 143.321 135.006  1.00  0.00           H  
ATOM    710  HE1 TRP A  48     121.601 143.058 132.478  1.00  0.00           H  
ATOM    711  HE3 TRP A  48     124.953 140.044 135.389  1.00  0.00           H  
ATOM    712  HZ2 TRP A  48     123.522 141.536 130.864  1.00  0.00           H  
ATOM    713  HZ3 TRP A  48     126.110 139.191 133.385  1.00  0.00           H  
ATOM    714  HH2 TRP A  48     125.411 139.921 131.118  1.00  0.00           H  
ATOM    715  HA  TRP A  48     124.677 141.868 137.160  1.00  0.00           H  
ATOM    716  N   LYS A  49     125.271 144.430 137.247  1.00  0.00         0 N  
ATOM    717  CA  LYS A  49     125.610 145.822 136.995  1.00  0.00         0 C  
ATOM    718  C   LYS A  49     125.116 146.687 138.163  1.00  0.00         0 C  
ATOM    719  O   LYS A  49     124.693 147.828 137.975  1.00  0.00         0 O  
ATOM    720  CB  LYS A  49     125.018 146.236 135.645  1.00  0.00           C  
ATOM    721  CG  LYS A  49     125.349 145.260 134.512  1.00  0.00           C  
ATOM    722  CD  LYS A  49     124.981 145.764 133.111  1.00  0.00           C  
ATOM    723  CE  LYS A  49     125.305 144.799 131.963  1.00  0.00           C  
ATOM    724  NZ  LYS A  49     124.726 145.220 130.675  1.00  0.00           N1+
ATOM    725  H   LYS A  49     126.033 143.801 137.453  1.00  0.00         0 H  
ATOM    726  HB2 LYS A  49     123.932 146.290 135.725  1.00  0.00           H  
ATOM    727  HB3 LYS A  49     125.410 147.213 135.361  1.00  0.00           H  
ATOM    728  HG2 LYS A  49     126.421 145.060 134.506  1.00  0.00           H  
ATOM    729  HG3 LYS A  49     124.807 144.327 134.666  1.00  0.00           H  
ATOM    730  HD2 LYS A  49     125.522 146.686 132.902  1.00  0.00           H  
ATOM    731  HD3 LYS A  49     123.909 145.953 133.063  1.00  0.00           H  
ATOM    732  HE2 LYS A  49     126.386 144.736 131.834  1.00  0.00           H  
ATOM    733  HE3 LYS A  49     124.910 143.810 132.196  1.00  0.00           H  
ATOM    734  HZ1 LYS A  49     123.721 145.271 130.758  1.00  0.00           H  
ATOM    735  HZ2 LYS A  49     125.089 146.128 130.423  1.00  0.00           H  
ATOM    736  HZ3 LYS A  49     124.971 144.550 129.960  1.00  0.00           H  
ATOM    737  HA  LYS A  49     126.684 145.911 136.830  1.00  0.00           H  
ATOM    738  N   SER A  50     125.178 146.120 139.365  1.00  0.00         0 N  
ATOM    739  CA  SER A  50     124.755 146.897 140.534  1.00  0.00         0 C  
ATOM    740  C   SER A  50     125.784 148.026 141.016  1.00  0.00         0 C  
ATOM    741  O   SER A  50     125.447 148.960 141.740  1.00  0.00         0 O  
ATOM    742  CB  SER A  50     124.542 145.922 141.698  1.00  0.00         0 C  
ATOM    743  OG  SER A  50     123.533 144.964 141.354  1.00  0.00           O  
ATOM    744  H   SER A  50     125.533 145.180 139.462  1.00  0.00         0 H  
ATOM    745  HA  SER A  50     123.811 147.384 140.290  1.00  0.00           H  
ATOM    746  HB2 SER A  50     125.474 145.399 141.911  1.00  0.00           H  
ATOM    747  HB3 SER A  50     124.225 146.474 142.583  1.00  0.00           H  
ATOM    748  HG  SER A  50     122.708 145.420 141.168  1.00  0.00           H  
ATOM    749  N   VAL A  51     127.042 147.794 140.650  1.00  0.00         0 N  
ATOM    750  CA  VAL A  51     128.159 148.638 141.078  1.00  0.00         0 C  
ATOM    751  C   VAL A  51     128.201 149.900 140.201  1.00  0.00         0 C  
ATOM    752  O   VAL A  51     127.999 151.016 140.679  1.00  0.00         0 O  
ATOM    753  CB  VAL A  51     129.483 147.831 141.096  1.00  0.00           C  
ATOM    754  CG1 VAL A  51     130.567 148.667 141.779  1.00  0.00           C  
ATOM    755  CG2 VAL A  51     129.341 146.498 141.842  1.00  0.00           C  
ATOM    756  H   VAL A  51     127.258 147.009 140.053  1.00  0.00         0 H  
ATOM    757  HB  VAL A  51     129.778 147.593 140.074  1.00  0.00           H  
ATOM    758 HG11 VAL A  51     131.502 148.107 141.796  1.00  0.00           H  
ATOM    759 HG12 VAL A  51     130.711 149.597 141.228  1.00  0.00           H  
ATOM    760 HG13 VAL A  51     130.262 148.895 142.800  1.00  0.00           H  
ATOM    761 HG21 VAL A  51     130.294 145.969 141.827  1.00  0.00           H  
ATOM    762 HG22 VAL A  51     129.047 146.688 142.874  1.00  0.00           H  
ATOM    763 HG23 VAL A  51     128.581 145.887 141.355  1.00  0.00           H  
ATOM    764  HA  VAL A  51     128.086 148.823 142.149  1.00  0.00           H  
ATOM    765  N   THR A  52     128.465 149.693 138.915  1.00  0.00         0 N  
ATOM    766  CA  THR A  52     128.549 150.749 137.920  1.00  0.00         0 C  
ATOM    767  C   THR A  52     128.363 150.100 136.544  1.00  0.00         0 C  
ATOM    768  O   THR A  52     129.094 149.167 136.203  1.00  0.00         0 O  
ATOM    769  CB  THR A  52     129.866 151.547 138.052  1.00  0.00         0 C  
ATOM    770  OG1 THR A  52     130.005 152.409 136.918  1.00  0.00           O  
ATOM    771  CG2 THR A  52     131.111 150.656 138.150  1.00  0.00           C  
ATOM    772  H   THR A  52     128.623 148.755 138.576  1.00  0.00         0 H  
ATOM    773  HA  THR A  52     127.824 151.528 138.154  1.00  0.00           H  
ATOM    774  HB3 THR A  52     129.851 152.123 138.977  1.00  0.00           H  
ATOM    775  HG1 THR A  52     129.353 153.112 136.968  1.00  0.00           H  
ATOM    776 HG21 THR A  52     131.999 151.281 138.241  1.00  0.00           H  
ATOM    777 HG22 THR A  52     131.029 150.013 139.026  1.00  0.00           H  
ATOM    778 HG23 THR A  52     131.189 150.041 137.254  1.00  0.00           H  
ATOM    779  N   LYS A  53     127.394 150.602 135.784  1.00  0.00         0 N  
ATOM    780  CA  LYS A  53     127.091 150.097 134.453  1.00  0.00         0 C  
ATOM    781  C   LYS A  53     128.011 150.774 133.429  1.00  0.00         0 C  
ATOM    782  O   LYS A  53     127.881 151.966 133.147  1.00  0.00         0 O  
ATOM    783  CB  LYS A  53     125.603 150.321 134.169  1.00  0.00         0 C  
ATOM    784  CG  LYS A  53     124.706 150.047 135.380  1.00  0.00           C  
ATOM    785  CD  LYS A  53     123.205 150.026 135.067  1.00  0.00           C  
ATOM    786  CE  LYS A  53     122.306 149.521 136.204  1.00  0.00           C  
ATOM    787  NZ  LYS A  53     120.875 149.522 135.852  1.00  0.00           N1+
ATOM    788  H   LYS A  53     126.831 151.368 136.124  1.00  0.00         0 H  
ATOM    789  HA  LYS A  53     127.181 149.011 134.447  1.00  0.00           H  
ATOM    790  HB2 LYS A  53     125.442 151.356 133.870  1.00  0.00           H  
ATOM    791  HB3 LYS A  53     125.282 149.657 133.367  1.00  0.00           H  
ATOM    792  HG2 LYS A  53     124.863 150.821 136.132  1.00  0.00           H  
ATOM    793  HG3 LYS A  53     124.955 149.074 135.804  1.00  0.00           H  
ATOM    794  HD2 LYS A  53     123.020 149.375 134.213  1.00  0.00           H  
ATOM    795  HD3 LYS A  53     122.868 151.036 134.833  1.00  0.00           H  
ATOM    796  HE2 LYS A  53     122.583 148.498 136.459  1.00  0.00           H  
ATOM    797  HE3 LYS A  53     122.432 150.159 137.079  1.00  0.00           H  
ATOM    798  HZ1 LYS A  53     120.725 148.923 135.053  1.00  0.00           H  
ATOM    799  HZ2 LYS A  53     120.335 149.181 136.634  1.00  0.00           H  
ATOM    800  HZ3 LYS A  53     120.584 150.462 135.627  1.00  0.00           H  
ATOM    801  N   ASN A  54     128.935 149.987 132.886  1.00  0.00         0 N  
ATOM    802  CA  ASN A  54     129.894 150.464 131.894  1.00  0.00         0 C  
ATOM    803  C   ASN A  54     130.718 149.292 131.396  1.00  0.00         0 C  
ATOM    804  O   ASN A  54     130.947 148.319 132.121  1.00  0.00         0 O  
ATOM    805  CB  ASN A  54     130.737 151.623 132.460  1.00  0.00         0 C  
ATOM    806  CG  ASN A  54     131.787 152.226 131.528  1.00  0.00           C  
ATOM    807  OD1 ASN A  54     132.875 151.691 131.350  1.00  0.00           O  
ATOM    808  ND2 ASN A  54     131.450 153.339 130.879  1.00  0.00           N  
ATOM    809  H   ASN A  54     128.994 149.016 133.159  1.00  0.00         0 H  
ATOM    810  HA  ASN A  54     129.367 151.013 131.113  1.00  0.00           H  
ATOM    811  HB2 ASN A  54     130.081 152.448 132.739  1.00  0.00           H  
ATOM    812  HB3 ASN A  54     131.283 151.281 133.339  1.00  0.00           H  
ATOM    813 HD21 ASN A  54     132.108 153.776 130.251  1.00  0.00           H  
ATOM    814 HD22 ASN A  54     130.535 153.745 131.016  1.00  0.00           H  
ATOM    815  N   ARG A  55     131.236 149.448 130.178  1.00  0.00         0 N  
ATOM    816  CA  ARG A  55     132.158 148.517 129.564  1.00  0.00         0 C  
ATOM    817  C   ARG A  55     133.414 148.216 130.372  1.00  0.00         0 C  
ATOM    818  O   ARG A  55     133.955 147.112 130.296  1.00  0.00         0 O  
ATOM    819  CB  ARG A  55     132.457 148.902 128.109  1.00  0.00         0 C  
ATOM    820  CG  ARG A  55     131.262 148.950 127.150  1.00  0.00           C  
ATOM    821  CD  ARG A  55     131.733 148.851 125.691  1.00  0.00           C  
ATOM    822  NE  ARG A  55     130.644 148.427 124.812  1.00  0.00           N  
ATOM    823  CZ  ARG A  55     130.738 148.061 123.528  1.00  0.00           C  
ATOM    824  NH1 ARG A  55     131.912 148.047 122.886  1.00  0.00           N  
ATOM    825  NH2 ARG A  55     129.621 147.714 122.889  1.00  0.00           N1+
ATOM    826  H   ARG A  55     131.030 150.303 129.684  1.00  0.00         0 H  
ATOM    827  HA  ARG A  55     131.615 147.571 129.516  1.00  0.00           H  
ATOM    828  HB2 ARG A  55     132.938 149.881 128.115  1.00  0.00           H  
ATOM    829  HB3 ARG A  55     133.199 148.212 127.712  1.00  0.00           H  
ATOM    830  HG2 ARG A  55     130.575 148.131 127.369  1.00  0.00           H  
ATOM    831  HG3 ARG A  55     130.693 149.869 127.304  1.00  0.00           H  
ATOM    832  HD2 ARG A  55     132.121 149.800 125.318  1.00  0.00           H  
ATOM    833  HD3 ARG A  55     132.553 148.136 125.609  1.00  0.00           H  
ATOM    834  HE  ARG A  55     129.746 148.298 125.276  1.00  0.00           H  
ATOM    835 HH11 ARG A  55     131.990 147.671 121.955  1.00  0.00           H  
ATOM    836 HH12 ARG A  55     132.750 148.311 123.380  1.00  0.00           H  
ATOM    837 HH21 ARG A  55     129.603 147.487 121.907  1.00  0.00           H  
ATOM    838 HH22 ARG A  55     128.762 147.697 123.433  1.00  0.00           H  
ATOM    839  N   THR A  56     133.835 149.183 131.181  1.00  0.00         0 N  
ATOM    840  CA  THR A  56     134.963 149.017 132.060  1.00  0.00         0 C  
ATOM    841  C   THR A  56     134.671 148.135 133.271  1.00  0.00         0 C  
ATOM    842  O   THR A  56     135.510 147.340 133.697  1.00  0.00         0 O  
ATOM    843  CB  THR A  56     135.549 150.404 132.479  1.00  0.00           C  
ATOM    844  OG1 THR A  56     136.181 151.018 131.362  1.00  0.00           O  
ATOM    845  CG2 THR A  56     136.649 150.354 133.556  1.00  0.00           C  
ATOM    846  H   THR A  56     133.363 150.086 131.176  1.00  0.00         0 H  
ATOM    847  HB  THR A  56     134.759 151.063 132.843  1.00  0.00           H  
ATOM    848  HG1 THR A  56     135.501 151.411 130.826  1.00  0.00           H  
ATOM    849 HG21 THR A  56     137.115 151.331 133.689  1.00  0.00           H  
ATOM    850 HG22 THR A  56     136.247 150.066 134.528  1.00  0.00           H  
ATOM    851 HG23 THR A  56     137.432 149.640 133.301  1.00  0.00           H  
ATOM    852  HA  THR A  56     135.751 148.495 131.513  1.00  0.00           H  
ATOM    853  N   SER A  57     133.459 148.245 133.798  1.00  0.00         0 N  
ATOM    854  CA  SER A  57     133.035 147.480 134.936  1.00  0.00         0 C  
ATOM    855  C   SER A  57     132.768 146.039 134.547  1.00  0.00         0 C  
ATOM    856  O   SER A  57     133.192 145.113 135.235  1.00  0.00         0 O  
ATOM    857  CB  SER A  57     131.751 148.183 135.430  1.00  0.00           C  
ATOM    858  OG  SER A  57     131.288 147.726 136.676  1.00  0.00           O  
ATOM    859  H   SER A  57     132.768 148.784 133.295  1.00  0.00         0 H  
ATOM    860  HB2 SER A  57     131.917 149.259 135.508  1.00  0.00           H  
ATOM    861  HB3 SER A  57     130.937 148.050 134.717  1.00  0.00           H  
ATOM    862  HG  SER A  57     130.423 148.088 136.836  1.00  0.00           H  
ATOM    863  HA  SER A  57     133.797 147.509 135.718  1.00  0.00           H  
ATOM    864  N   TYR A  58     132.163 145.879 133.375  1.00  0.00         0 N  
ATOM    865  CA  TYR A  58     131.894 144.625 132.724  1.00  0.00         0 C  
ATOM    866  C   TYR A  58     133.112 143.713 132.608  1.00  0.00         0 C  
ATOM    867  O   TYR A  58     133.089 142.543 133.001  1.00  0.00         0 O  
ATOM    868  CB  TYR A  58     131.261 144.959 131.356  1.00  0.00         0 C  
ATOM    869  CG  TYR A  58     131.099 143.812 130.379  1.00  0.00           C  
ATOM    870  CD1 TYR A  58     129.914 143.048 130.384  1.00  0.00           C  
ATOM    871  CD2 TYR A  58     132.128 143.509 129.462  1.00  0.00           C  
ATOM    872  CE1 TYR A  58     129.756 141.988 129.472  1.00  0.00           C  
ATOM    873  CE2 TYR A  58     131.969 142.448 128.550  1.00  0.00           C  
ATOM    874  CZ  TYR A  58     130.782 141.691 128.554  1.00  0.00           C  
ATOM    875  OH  TYR A  58     130.633 140.669 127.665  1.00  0.00           O  
ATOM    876  H   TYR A  58     131.815 146.713 132.914  1.00  0.00         0 H  
ATOM    877  HA  TYR A  58     131.152 144.098 133.327  1.00  0.00           H  
ATOM    878  HB2 TYR A  58     130.273 145.397 131.515  1.00  0.00           H  
ATOM    879  HB3 TYR A  58     131.845 145.734 130.864  1.00  0.00           H  
ATOM    880  HD1 TYR A  58     129.123 143.270 131.087  1.00  0.00           H  
ATOM    881  HD2 TYR A  58     133.045 144.082 129.457  1.00  0.00           H  
ATOM    882  HE1 TYR A  58     128.842 141.411 129.488  1.00  0.00           H  
ATOM    883  HE2 TYR A  58     132.756 142.217 127.847  1.00  0.00           H  
ATOM    884  HH  TYR A  58     129.724 140.426 127.537  1.00  0.00           H  
ATOM    885  N   MET A  59     134.207 144.304 132.135  1.00  0.00         0 N  
ATOM    886  CA  MET A  59     135.457 143.608 131.936  1.00  0.00         0 C  
ATOM    887  C   MET A  59     136.176 143.284 133.241  1.00  0.00         0 C  
ATOM    888  O   MET A  59     136.900 142.296 133.334  1.00  0.00         0 O  
ATOM    889  CB  MET A  59     136.360 144.519 131.068  1.00  0.00         0 C  
ATOM    890  CG  MET A  59     137.588 143.809 130.468  1.00  0.00           C  
ATOM    891  SD  MET A  59     137.182 142.479 129.295  1.00  0.00           S  
ATOM    892  CE  MET A  59     138.216 141.152 129.973  1.00  0.00           C  
ATOM    893  H   MET A  59     134.152 145.274 131.852  1.00  0.00         0 H  
ATOM    894  HA  MET A  59     135.248 142.692 131.385  1.00  0.00           H  
ATOM    895  HB2 MET A  59     135.780 144.929 130.240  1.00  0.00           H  
ATOM    896  HB3 MET A  59     136.694 145.380 131.650  1.00  0.00           H  
ATOM    897  HG2 MET A  59     138.200 144.538 129.936  1.00  0.00           H  
ATOM    898  HG3 MET A  59     138.228 143.420 131.261  1.00  0.00           H  
ATOM    899  HE1 MET A  59     138.052 140.225 129.425  1.00  0.00           H  
ATOM    900  HE2 MET A  59     139.272 141.413 129.904  1.00  0.00           H  
ATOM    901  HE3 MET A  59     137.971 140.974 131.020  1.00  0.00           H  
ATOM    902  N   ARG A  60     135.936 144.085 134.274  1.00  0.00         0 N  
ATOM    903  CA  ARG A  60     136.463 143.795 135.583  1.00  0.00         0 C  
ATOM    904  C   ARG A  60     135.681 142.704 136.272  1.00  0.00         0 C  
ATOM    905  O   ARG A  60     136.275 141.808 136.860  1.00  0.00         0 O  
ATOM    906  CB  ARG A  60     136.431 145.092 136.430  1.00  0.00         0 C  
ATOM    907  CG  ARG A  60     137.179 145.034 137.785  1.00  0.00           C  
ATOM    908  CD  ARG A  60     136.258 145.051 139.024  1.00  0.00           C  
ATOM    909  NE  ARG A  60     137.044 144.993 140.269  1.00  0.00           N  
ATOM    910  CZ  ARG A  60     136.569 144.991 141.528  1.00  0.00           C  
ATOM    911  NH1 ARG A  60     135.262 145.044 141.804  1.00  0.00           N  
ATOM    912  NH2 ARG A  60     137.415 144.940 142.560  1.00  0.00           N1+
ATOM    913  H   ARG A  60     135.322 144.878 134.149  1.00  0.00         0 H  
ATOM    914  HA  ARG A  60     137.505 143.476 135.496  1.00  0.00           H  
ATOM    915  HB2 ARG A  60     136.890 145.881 135.831  1.00  0.00           H  
ATOM    916  HB3 ARG A  60     135.407 145.427 136.593  1.00  0.00           H  
ATOM    917  HG2 ARG A  60     137.845 144.169 137.816  1.00  0.00           H  
ATOM    918  HG3 ARG A  60     137.835 145.903 137.846  1.00  0.00           H  
ATOM    919  HD2 ARG A  60     135.669 145.969 139.021  1.00  0.00           H  
ATOM    920  HD3 ARG A  60     135.552 144.222 139.008  1.00  0.00           H  
ATOM    921  HE  ARG A  60     138.042 144.905 140.140  1.00  0.00           H  
ATOM    922 HH11 ARG A  60     134.977 145.102 142.779  1.00  0.00           H  
ATOM    923 HH12 ARG A  60     134.561 145.032 141.079  1.00  0.00           H  
ATOM    924 HH21 ARG A  60     137.023 144.934 143.499  1.00  0.00           H  
ATOM    925 HH22 ARG A  60     138.415 144.893 142.442  1.00  0.00           H  
ATOM    926  N   HIS A  61     134.359 142.770 136.179  1.00  0.00         0 N  
ATOM    927  CA  HIS A  61     133.473 141.790 136.761  1.00  0.00         0 C  
ATOM    928  C   HIS A  61     133.671 140.394 136.198  1.00  0.00         0 C  
ATOM    929  O   HIS A  61     133.676 139.434 136.970  1.00  0.00         0 O  
ATOM    930  CB  HIS A  61     132.006 142.239 136.592  1.00  0.00         0 C  
ATOM    931  CG  HIS A  61     131.506 143.069 137.749  1.00  0.00           C  
ATOM    932  ND1 HIS A  61     130.738 142.539 138.772  1.00  0.00           N  
ATOM    933  CD2 HIS A  61     131.717 144.385 138.096  1.00  0.00           C  
ATOM    934  CE1 HIS A  61     130.513 143.512 139.655  1.00  0.00           C  
ATOM    935  NE2 HIS A  61     131.085 144.661 139.310  1.00  0.00           N  
ATOM    936  H   HIS A  61     133.940 143.561 135.693  1.00  0.00         0 H  
ATOM    937  HA  HIS A  61     133.689 141.726 137.830  1.00  0.00           H  
ATOM    938  HB2 HIS A  61     131.869 142.795 135.664  1.00  0.00           H  
ATOM    939  HB3 HIS A  61     131.340 141.376 136.510  1.00  0.00           H  
ATOM    940  HD1 HIS A  61     130.412 141.576 138.874  1.00  0.00           H  
ATOM    941  HD2 HIS A  61     132.286 145.145 137.582  1.00  0.00           H  
ATOM    942  HE1 HIS A  61     129.933 143.375 140.559  1.00  0.00           H  
ATOM    943  N   THR A  62     133.925 140.288 134.883  1.00  0.00         0 N  
ATOM    944  CA  THR A  62     134.347 139.033 134.315  1.00  0.00         0 C  
ATOM    945  C   THR A  62     135.663 138.543 134.896  1.00  0.00         0 C  
ATOM    946  O   THR A  62     135.739 137.427 135.401  1.00  0.00         0 O  
ATOM    947  CB  THR A  62     134.273 139.024 132.763  1.00  0.00         0 C  
ATOM    948  OG1 THR A  62     134.221 137.695 132.290  1.00  0.00           O  
ATOM    949  CG2 THR A  62     135.401 139.716 131.999  1.00  0.00           C  
ATOM    950  H   THR A  62     133.861 141.108 134.289  1.00  0.00         0 H  
ATOM    951  HA  THR A  62     133.579 138.322 134.616  1.00  0.00           H  
ATOM    952  HB3 THR A  62     133.332 139.489 132.466  1.00  0.00           H  
ATOM    953  HG1 THR A  62     134.958 137.197 132.642  1.00  0.00           H  
ATOM    954 HG21 THR A  62     135.239 139.690 130.922  1.00  0.00           H  
ATOM    955 HG22 THR A  62     135.425 140.754 132.285  1.00  0.00           H  
ATOM    956 HG23 THR A  62     136.381 139.279 132.194  1.00  0.00           H  
ATOM    957  N   CYS A  63     136.662 139.423 134.923  1.00  0.00         0 N  
ATOM    958  CA  CYS A  63     137.950 139.097 135.482  1.00  0.00         0 C  
ATOM    959  C   CYS A  63     137.932 138.627 136.930  1.00  0.00         0 C  
ATOM    960  O   CYS A  63     138.586 137.650 137.288  1.00  0.00         0 O  
ATOM    961  CB  CYS A  63     138.942 140.261 135.277  1.00  0.00           C  
ATOM    962  SG  CYS A  63     139.554 140.269 133.564  1.00  0.00           S  
ATOM    963  H   CYS A  63     136.546 140.337 134.505  1.00  0.00         0 H  
ATOM    964  HB2 CYS A  63     138.493 141.223 135.519  1.00  0.00           H  
ATOM    965  HB3 CYS A  63     139.814 140.142 135.920  1.00  0.00           H  
ATOM    966  HG  CYS A  63     140.057 141.507 133.603  1.00  0.00           H  
ATOM    967  HA  CYS A  63     138.330 138.241 134.918  1.00  0.00           H  
ATOM    968  N   ILE A  64     137.107 139.289 137.732  1.00  0.00         0 N  
ATOM    969  CA  ILE A  64     136.845 138.935 139.102  1.00  0.00         0 C  
ATOM    970  C   ILE A  64     136.244 137.552 139.273  1.00  0.00         0 C  
ATOM    971  O   ILE A  64     136.770 136.747 140.047  1.00  0.00         0 O  
ATOM    972  CB  ILE A  64     136.008 140.071 139.766  1.00  0.00         0 C  
ATOM    973  CG1 ILE A  64     136.835 141.371 139.945  1.00  0.00           C  
ATOM    974  CG2 ILE A  64     135.304 139.698 141.088  1.00  0.00           C  
ATOM    975  CD1 ILE A  64     137.882 141.341 141.066  1.00  0.00           C  
ATOM    976  H   ILE A  64     136.617 140.093 137.349  1.00  0.00         0 H  
ATOM    977  HA  ILE A  64     137.811 138.888 139.607  1.00  0.00           H  
ATOM    978  HB3 ILE A  64     135.201 140.312 139.073  1.00  0.00           H  
ATOM    979 HG12 ILE A  64     137.353 141.628 139.025  1.00  0.00           H  
ATOM    980 HG13 ILE A  64     136.143 142.188 140.142  1.00  0.00           H  
ATOM    981 HG21 ILE A  64     134.824 140.568 141.537  1.00  0.00           H  
ATOM    982 HG22 ILE A  64     134.518 138.956 140.935  1.00  0.00           H  
ATOM    983 HG23 ILE A  64     136.004 139.291 141.819  1.00  0.00           H  
ATOM    984 HD11 ILE A  64     138.443 142.274 141.091  1.00  0.00           H  
ATOM    985 HD12 ILE A  64     137.423 141.216 142.047  1.00  0.00           H  
ATOM    986 HD13 ILE A  64     138.602 140.535 140.923  1.00  0.00           H  
ATOM    987  N   VAL A  65     135.162 137.268 138.544  1.00  0.00         0 N  
ATOM    988  CA  VAL A  65     134.520 135.978 138.662  1.00  0.00         0 C  
ATOM    989  C   VAL A  65     135.379 134.850 138.115  1.00  0.00         0 C  
ATOM    990  O   VAL A  65     135.377 133.754 138.673  1.00  0.00         0 O  
ATOM    991  CB  VAL A  65     133.076 136.009 138.081  1.00  0.00           C  
ATOM    992  CG1 VAL A  65     132.980 136.040 136.553  1.00  0.00           C  
ATOM    993  CG2 VAL A  65     132.211 134.868 138.640  1.00  0.00           C  
ATOM    994  H   VAL A  65     134.779 137.957 137.903  1.00  0.00         0 H  
ATOM    995  HB  VAL A  65     132.612 136.932 138.434  1.00  0.00           H  
ATOM    996 HG11 VAL A  65     131.946 136.121 136.224  1.00  0.00           H  
ATOM    997 HG12 VAL A  65     133.495 136.911 136.177  1.00  0.00           H  
ATOM    998 HG13 VAL A  65     133.413 135.157 136.082  1.00  0.00           H  
ATOM    999 HG21 VAL A  65     131.204 134.887 138.229  1.00  0.00           H  
ATOM   1000 HG22 VAL A  65     132.633 133.886 138.420  1.00  0.00           H  
ATOM   1001 HG23 VAL A  65     132.114 134.962 139.718  1.00  0.00           H  
ATOM   1002  HA  VAL A  65     134.407 135.788 139.732  1.00  0.00           H  
ATOM   1003  N   ASN A  66     136.179 135.148 137.090  1.00  0.00         0 N  
ATOM   1004  CA  ASN A  66     137.166 134.223 136.596  1.00  0.00         0 C  
ATOM   1005  C   ASN A  66     138.253 133.835 137.575  1.00  0.00         0 C  
ATOM   1006  O   ASN A  66     138.581 132.651 137.693  1.00  0.00         0 O  
ATOM   1007  CB  ASN A  66     137.773 134.711 135.264  1.00  0.00           C  
ATOM   1008  CG  ASN A  66     136.802 134.608 134.083  1.00  0.00           C  
ATOM   1009  OD1 ASN A  66     136.509 135.591 133.414  1.00  0.00           O  
ATOM   1010  ND2 ASN A  66     136.294 133.414 133.794  1.00  0.00           N  
ATOM   1011  H   ASN A  66     136.100 136.063 136.651  1.00  0.00         0 H  
ATOM   1012  HB2 ASN A  66     138.139 135.734 135.351  1.00  0.00           H  
ATOM   1013  HB3 ASN A  66     138.644 134.101 135.018  1.00  0.00           H  
ATOM   1014 HD22 ASN A  66     135.642 133.348 133.029  1.00  0.00           H  
ATOM   1015 HD21 ASN A  66     136.518 132.613 134.360  1.00  0.00           H  
ATOM   1016  HA  ASN A  66     136.638 133.288 136.398  1.00  0.00           H  
ATOM   1017  N   ILE A  67     138.755 134.816 138.323  1.00  0.00         0 N  
ATOM   1018  CA  ILE A  67     139.708 134.571 139.383  1.00  0.00         0 C  
ATOM   1019  C   ILE A  67     139.111 133.761 140.516  1.00  0.00         0 C  
ATOM   1020  O   ILE A  67     139.700 132.774 140.951  1.00  0.00         0 O  
ATOM   1021  CB  ILE A  67     140.341 135.918 139.875  1.00  0.00           C  
ATOM   1022  CG1 ILE A  67     141.212 136.557 138.767  1.00  0.00           C  
ATOM   1023  CG2 ILE A  67     141.194 135.775 141.161  1.00  0.00           C  
ATOM   1024  CD1 ILE A  67     141.508 138.054 138.959  1.00  0.00           C  
ATOM   1025  H   ILE A  67     138.461 135.771 138.146  1.00  0.00         0 H  
ATOM   1026  HB  ILE A  67     139.522 136.604 140.101  1.00  0.00           H  
ATOM   1027 HG12 ILE A  67     142.151 136.009 138.679  1.00  0.00           H  
ATOM   1028 HG13 ILE A  67     140.716 136.447 137.805  1.00  0.00           H  
ATOM   1029 HG21 ILE A  67     141.661 136.717 141.445  1.00  0.00           H  
ATOM   1030 HG22 ILE A  67     140.600 135.464 142.020  1.00  0.00           H  
ATOM   1031 HG23 ILE A  67     141.992 135.043 141.028  1.00  0.00           H  
ATOM   1032 HD11 ILE A  67     142.052 138.449 138.099  1.00  0.00           H  
ATOM   1033 HD12 ILE A  67     140.586 138.629 139.054  1.00  0.00           H  
ATOM   1034 HD13 ILE A  67     142.117 138.246 139.841  1.00  0.00           H  
ATOM   1035  HA  ILE A  67     140.518 133.967 138.967  1.00  0.00           H  
ATOM   1036  N   ALA A  68     137.920 134.158 140.951  1.00  0.00         0 N  
ATOM   1037  CA  ALA A  68     137.222 133.517 142.039  1.00  0.00         0 C  
ATOM   1038  C   ALA A  68     136.822 132.083 141.742  1.00  0.00         0 C  
ATOM   1039  O   ALA A  68     136.948 131.209 142.598  1.00  0.00         0 O  
ATOM   1040  CB  ALA A  68     135.957 134.347 142.328  1.00  0.00         0 C  
ATOM   1041  H   ALA A  68     137.508 134.987 140.530  1.00  0.00         0 H  
ATOM   1042  HA  ALA A  68     137.873 133.521 142.913  1.00  0.00           H  
ATOM   1043  HB1 ALA A  68     135.312 133.877 143.069  1.00  0.00           H  
ATOM   1044  HB2 ALA A  68     136.215 135.340 142.697  1.00  0.00           H  
ATOM   1045  HB3 ALA A  68     135.354 134.476 141.430  1.00  0.00           H  
ATOM   1046  N   ALA A  69     136.402 131.845 140.500  1.00  0.00         0 N  
ATOM   1047  CA  ALA A  69     136.119 130.527 139.992  1.00  0.00         0 C  
ATOM   1048  C   ALA A  69     137.353 129.650 139.943  1.00  0.00         0 C  
ATOM   1049  O   ALA A  69     137.319 128.508 140.404  1.00  0.00         0 O  
ATOM   1050  CB  ALA A  69     135.501 130.638 138.590  1.00  0.00         0 C  
ATOM   1051  H   ALA A  69     136.276 132.633 139.870  1.00  0.00         0 H  
ATOM   1052  HA  ALA A  69     135.392 130.052 140.655  1.00  0.00           H  
ATOM   1053  HB1 ALA A  69     135.288 129.651 138.177  1.00  0.00           H  
ATOM   1054  HB2 ALA A  69     134.560 131.186 138.620  1.00  0.00           H  
ATOM   1055  HB3 ALA A  69     136.165 131.151 137.892  1.00  0.00           H  
ATOM   1056  N   SER A  70     138.447 130.212 139.429  1.00  0.00         0 N  
ATOM   1057  CA  SER A  70     139.700 129.498 139.307  1.00  0.00         0 C  
ATOM   1058  C   SER A  70     140.332 129.175 140.641  1.00  0.00         0 C  
ATOM   1059  O   SER A  70     140.770 128.049 140.853  1.00  0.00         0 O  
ATOM   1060  CB  SER A  70     140.656 130.227 138.331  1.00  0.00           C  
ATOM   1061  OG  SER A  70     140.222 130.212 136.977  1.00  0.00           O  
ATOM   1062  H   SER A  70     138.400 131.159 139.069  1.00  0.00         0 H  
ATOM   1063  HB2 SER A  70     140.845 131.255 138.635  1.00  0.00           H  
ATOM   1064  HB3 SER A  70     141.596 129.682 138.299  1.00  0.00           H  
ATOM   1065  HG  SER A  70     139.477 130.798 136.889  1.00  0.00           H  
ATOM   1066  HA  SER A  70     139.482 128.537 138.838  1.00  0.00           H  
ATOM   1067  N   LEU A  71     140.248 130.122 141.573  1.00  0.00         0 N  
ATOM   1068  CA  LEU A  71     140.656 129.946 142.945  1.00  0.00         0 C  
ATOM   1069  C   LEU A  71     139.854 128.880 143.686  1.00  0.00         0 C  
ATOM   1070  O   LEU A  71     140.385 128.170 144.543  1.00  0.00         0 O  
ATOM   1071  CB  LEU A  71     140.604 131.327 143.647  1.00  0.00           C  
ATOM   1072  CG  LEU A  71     141.223 131.426 145.062  1.00  0.00           C  
ATOM   1073  CD1 LEU A  71     142.661 130.880 145.129  1.00  0.00           C  
ATOM   1074  CD2 LEU A  71     141.204 132.887 145.549  1.00  0.00           C  
ATOM   1075  H   LEU A  71     139.877 131.033 141.308  1.00  0.00         0 H  
ATOM   1076  HB2 LEU A  71     141.129 132.045 143.015  1.00  0.00           H  
ATOM   1077  HB3 LEU A  71     139.568 131.670 143.686  1.00  0.00           H  
ATOM   1078  HG  LEU A  71     140.611 130.837 145.747  1.00  0.00           H  
ATOM   1079 HD11 LEU A  71     143.108 131.060 146.107  1.00  0.00           H  
ATOM   1080 HD12 LEU A  71     142.694 129.802 144.966  1.00  0.00           H  
ATOM   1081 HD13 LEU A  71     143.302 131.352 144.384  1.00  0.00           H  
ATOM   1082 HD21 LEU A  71     141.565 132.969 146.575  1.00  0.00           H  
ATOM   1083 HD22 LEU A  71     141.841 133.518 144.928  1.00  0.00           H  
ATOM   1084 HD23 LEU A  71     140.201 133.309 145.519  1.00  0.00           H  
ATOM   1085  HA  LEU A  71     141.694 129.612 142.914  1.00  0.00           H  
ATOM   1086  N   LEU A  72     138.583 128.738 143.316  1.00  0.00         0 N  
ATOM   1087  CA  LEU A  72     137.701 127.801 143.954  1.00  0.00         0 C  
ATOM   1088  C   LEU A  72     137.962 126.358 143.592  1.00  0.00         0 C  
ATOM   1089  O   LEU A  72     138.183 125.522 144.478  1.00  0.00         0 O  
ATOM   1090  CB  LEU A  72     136.220 128.166 143.659  1.00  0.00           C  
ATOM   1091  CG  LEU A  72     135.156 127.257 144.333  1.00  0.00           C  
ATOM   1092  CD1 LEU A  72     135.069 127.472 145.852  1.00  0.00           C  
ATOM   1093  CD2 LEU A  72     133.776 127.447 143.696  1.00  0.00           C  
ATOM   1094  H   LEU A  72     138.204 129.366 142.618  1.00  0.00         0 H  
ATOM   1095  HB2 LEU A  72     136.036 129.197 143.964  1.00  0.00           H  
ATOM   1096  HB3 LEU A  72     136.059 128.152 142.582  1.00  0.00           H  
ATOM   1097  HG  LEU A  72     135.405 126.210 144.163  1.00  0.00           H  
ATOM   1098 HD11 LEU A  72     134.369 126.770 146.306  1.00  0.00           H  
ATOM   1099 HD12 LEU A  72     136.031 127.322 146.335  1.00  0.00           H  
ATOM   1100 HD13 LEU A  72     134.724 128.475 146.096  1.00  0.00           H  
ATOM   1101 HD21 LEU A  72     133.062 126.717 144.079  1.00  0.00           H  
ATOM   1102 HD22 LEU A  72     133.381 128.432 143.918  1.00  0.00           H  
ATOM   1103 HD23 LEU A  72     133.812 127.332 142.612  1.00  0.00           H  
ATOM   1104  HA  LEU A  72     137.848 127.895 145.032  1.00  0.00           H  
ATOM   1105  N   VAL A  73     137.922 126.070 142.289  1.00  0.00         0 N  
ATOM   1106  CA  VAL A  73     138.212 124.741 141.781  1.00  0.00         0 C  
ATOM   1107  C   VAL A  73     139.631 124.333 142.149  1.00  0.00         0 C  
ATOM   1108  O   VAL A  73     139.857 123.197 142.559  1.00  0.00         0 O  
ATOM   1109  CB  VAL A  73     137.909 124.650 140.264  1.00  0.00           C  
ATOM   1110  CG1 VAL A  73     136.420 124.930 139.988  1.00  0.00           C  
ATOM   1111  CG2 VAL A  73     138.792 125.539 139.372  1.00  0.00           C  
ATOM   1112  H   VAL A  73     137.750 126.819 141.625  1.00  0.00         0 H  
ATOM   1113  HB  VAL A  73     138.098 123.617 139.965  1.00  0.00           H  
ATOM   1114 HG11 VAL A  73     136.169 124.737 138.945  1.00  0.00           H  
ATOM   1115 HG12 VAL A  73     135.778 124.293 140.599  1.00  0.00           H  
ATOM   1116 HG13 VAL A  73     136.154 125.965 140.202  1.00  0.00           H  
ATOM   1117 HG21 VAL A  73     138.524 125.429 138.321  1.00  0.00           H  
ATOM   1118 HG22 VAL A  73     138.691 126.588 139.627  1.00  0.00           H  
ATOM   1119 HG23 VAL A  73     139.846 125.282 139.457  1.00  0.00           H  
ATOM   1120  HA  VAL A  73     137.546 124.043 142.293  1.00  0.00           H  
ATOM   1121  N   ALA A  74     140.535 125.316 142.128  1.00  0.00         0 N  
ATOM   1122  CA  ALA A  74     141.887 125.192 142.582  1.00  0.00         0 C  
ATOM   1123  C   ALA A  74     142.119 124.599 143.959  1.00  0.00         0 C  
ATOM   1124  O   ALA A  74     142.760 123.557 144.101  1.00  0.00         0 O  
ATOM   1125  CB  ALA A  74     142.701 126.476 142.399  1.00  0.00         0 C  
ATOM   1126  H   ALA A  74     140.253 126.224 141.775  1.00  0.00         0 H  
ATOM   1127  HA  ALA A  74     142.337 124.471 141.896  1.00  0.00           H  
ATOM   1128  HB1 ALA A  74     143.710 126.336 142.776  1.00  0.00           H  
ATOM   1129  HB2 ALA A  74     142.808 126.739 141.348  1.00  0.00           H  
ATOM   1130  HB3 ALA A  74     142.272 127.319 142.935  1.00  0.00           H  
ATOM   1131  N   ASN A  75     141.576 125.265 144.970  1.00  0.00         0 N  
ATOM   1132  CA  ASN A  75     141.771 124.871 146.355  1.00  0.00         0 C  
ATOM   1133  C   ASN A  75     141.072 123.580 146.703  1.00  0.00         0 C  
ATOM   1134  O   ASN A  75     141.592 122.783 147.477  1.00  0.00         0 O  
ATOM   1135  CB  ASN A  75     141.225 125.995 147.266  1.00  0.00           C  
ATOM   1136  CG  ASN A  75     142.112 127.241 147.329  1.00  0.00           C  
ATOM   1137  OD1 ASN A  75     143.281 127.210 146.965  1.00  0.00           O  
ATOM   1138  ND2 ASN A  75     141.567 128.370 147.767  1.00  0.00           N  
ATOM   1139  H   ASN A  75     141.108 126.143 144.771  1.00  0.00         0 H  
ATOM   1140  HB2 ASN A  75     140.240 126.303 146.914  1.00  0.00           H  
ATOM   1141  HB3 ASN A  75     141.084 125.621 148.276  1.00  0.00           H  
ATOM   1142 HD22 ASN A  75     142.126 129.207 147.724  1.00  0.00           H  
ATOM   1143 HD21 ASN A  75     140.605 128.405 148.077  1.00  0.00           H  
ATOM   1144  HA  ASN A  75     142.837 124.727 146.546  1.00  0.00           H  
ATOM   1145  N   THR A  76     139.933 123.338 146.059  1.00  0.00         0 N  
ATOM   1146  CA  THR A  76     139.211 122.085 146.171  1.00  0.00         0 C  
ATOM   1147  C   THR A  76     140.061 120.957 145.606  1.00  0.00         0 C  
ATOM   1148  O   THR A  76     140.279 119.948 146.276  1.00  0.00         0 O  
ATOM   1149  CB  THR A  76     137.846 122.198 145.423  1.00  0.00         0 C  
ATOM   1150  OG1 THR A  76     137.080 123.319 145.850  1.00  0.00           O  
ATOM   1151  CG2 THR A  76     136.938 120.982 145.664  1.00  0.00           C  
ATOM   1152  H   THR A  76     139.594 124.035 145.408  1.00  0.00         0 H  
ATOM   1153  HA  THR A  76     139.026 121.886 147.229  1.00  0.00           H  
ATOM   1154  HB3 THR A  76     138.011 122.303 144.349  1.00  0.00           H  
ATOM   1155  HG1 THR A  76     137.463 124.114 145.482  1.00  0.00           H  
ATOM   1156 HG21 THR A  76     135.980 121.100 145.157  1.00  0.00           H  
ATOM   1157 HG22 THR A  76     137.387 120.059 145.297  1.00  0.00           H  
ATOM   1158 HG23 THR A  76     136.732 120.850 146.727  1.00  0.00           H  
ATOM   1159  N   TRP A  77     140.612 121.196 144.412  1.00  0.00         0 N  
ATOM   1160  CA  TRP A  77     141.561 120.321 143.779  1.00  0.00         0 C  
ATOM   1161  C   TRP A  77     142.796 120.003 144.601  1.00  0.00         0 C  
ATOM   1162  O   TRP A  77     143.191 118.843 144.707  1.00  0.00         0 O  
ATOM   1163  CB  TRP A  77     141.903 120.758 142.341  1.00  0.00           C  
ATOM   1164  CG  TRP A  77     141.022 120.172 141.280  1.00  0.00           C  
ATOM   1165  CD1 TRP A  77     140.245 120.859 140.415  1.00  0.00           C  
ATOM   1166  CD2 TRP A  77     140.821 118.760 140.965  1.00  0.00           C  
ATOM   1167  NE1 TRP A  77     139.567 119.972 139.602  1.00  0.00           N  
ATOM   1168  CE2 TRP A  77     139.878 118.663 139.899  1.00  0.00           C  
ATOM   1169  CE3 TRP A  77     141.328 117.544 141.485  1.00  0.00           C  
ATOM   1170  CZ2 TRP A  77     139.450 117.427 139.384  1.00  0.00           C  
ATOM   1171  CZ3 TRP A  77     140.900 116.297 140.984  1.00  0.00           C  
ATOM   1172  CH2 TRP A  77     139.961 116.238 139.936  1.00  0.00           C  
ATOM   1173  H   TRP A  77     140.392 122.057 143.917  1.00  0.00         0 H  
ATOM   1174  HB2 TRP A  77     141.978 121.839 142.241  1.00  0.00           H  
ATOM   1175  HB3 TRP A  77     142.877 120.370 142.082  1.00  0.00           H  
ATOM   1176  HD1 TRP A  77     140.167 121.936 140.386  1.00  0.00           H  
ATOM   1177  HE1 TRP A  77     138.900 120.266 138.899  1.00  0.00           H  
ATOM   1178  HE3 TRP A  77     142.043 117.573 142.293  1.00  0.00           H  
ATOM   1179  HZ2 TRP A  77     138.726 117.389 138.583  1.00  0.00           H  
ATOM   1180  HZ3 TRP A  77     141.285 115.383 141.413  1.00  0.00           H  
ATOM   1181  HH2 TRP A  77     139.626 115.282 139.561  1.00  0.00           H  
ATOM   1182  HA  TRP A  77     141.037 119.375 143.677  1.00  0.00           H  
ATOM   1183  N   PHE A  78     143.376 121.027 145.215  1.00  0.00         0 N  
ATOM   1184  CA  PHE A  78     144.564 120.873 146.021  1.00  0.00         0 C  
ATOM   1185  C   PHE A  78     144.324 120.132 147.328  1.00  0.00         0 C  
ATOM   1186  O   PHE A  78     145.142 119.320 147.759  1.00  0.00         0 O  
ATOM   1187  CB  PHE A  78     145.167 122.267 146.313  1.00  0.00           C  
ATOM   1188  CG  PHE A  78     146.435 122.251 147.161  1.00  0.00           C  
ATOM   1189  CD1 PHE A  78     147.641 121.752 146.626  1.00  0.00           C  
ATOM   1190  CD2 PHE A  78     146.404 122.702 148.498  1.00  0.00           C  
ATOM   1191  CE1 PHE A  78     148.802 121.688 147.421  1.00  0.00           C  
ATOM   1192  CE2 PHE A  78     147.566 122.641 149.294  1.00  0.00           C  
ATOM   1193  CZ  PHE A  78     148.765 122.136 148.756  1.00  0.00           C  
ATOM   1194  H   PHE A  78     143.031 121.964 145.016  1.00  0.00         0 H  
ATOM   1195  HB2 PHE A  78     145.409 122.762 145.370  1.00  0.00           H  
ATOM   1196  HB3 PHE A  78     144.424 122.905 146.793  1.00  0.00           H  
ATOM   1197  HD1 PHE A  78     147.681 121.402 145.607  1.00  0.00           H  
ATOM   1198  HD2 PHE A  78     145.488 123.088 148.922  1.00  0.00           H  
ATOM   1199  HE1 PHE A  78     149.722 121.303 147.005  1.00  0.00           H  
ATOM   1200  HE2 PHE A  78     147.536 122.988 150.316  1.00  0.00           H  
ATOM   1201  HZ  PHE A  78     149.657 122.097 149.361  1.00  0.00           H  
ATOM   1202  HA  PHE A  78     145.294 120.307 145.458  1.00  0.00           H  
ATOM   1203  N   ILE A  79     143.174 120.353 147.951  1.00  0.00         0 N  
ATOM   1204  CA  ILE A  79     142.828 119.623 149.148  1.00  0.00         0 C  
ATOM   1205  C   ILE A  79     142.621 118.139 148.878  1.00  0.00         0 C  
ATOM   1206  O   ILE A  79     143.124 117.300 149.631  1.00  0.00         0 O  
ATOM   1207  CB  ILE A  79     141.613 120.319 149.830  1.00  0.00           C  
ATOM   1208  CG1 ILE A  79     142.011 121.691 150.441  1.00  0.00           C  
ATOM   1209  CG2 ILE A  79     140.871 119.462 150.878  1.00  0.00           C  
ATOM   1210  CD1 ILE A  79     142.923 121.641 151.680  1.00  0.00           C  
ATOM   1211  H   ILE A  79     142.528 121.051 147.594  1.00  0.00         0 H  
ATOM   1212  HB  ILE A  79     140.881 120.525 149.046  1.00  0.00           H  
ATOM   1213 HG12 ILE A  79     142.515 122.303 149.696  1.00  0.00           H  
ATOM   1214 HG13 ILE A  79     141.102 122.237 150.698  1.00  0.00           H  
ATOM   1215 HG21 ILE A  79     140.100 120.043 151.384  1.00  0.00           H  
ATOM   1216 HG22 ILE A  79     140.371 118.607 150.422  1.00  0.00           H  
ATOM   1217 HG23 ILE A  79     141.553 119.078 151.638  1.00  0.00           H  
ATOM   1218 HD11 ILE A  79     143.153 122.650 152.024  1.00  0.00           H  
ATOM   1219 HD12 ILE A  79     142.451 121.120 152.512  1.00  0.00           H  
ATOM   1220 HD13 ILE A  79     143.873 121.152 151.468  1.00  0.00           H  
ATOM   1221  HA  ILE A  79     143.672 119.678 149.838  1.00  0.00           H  
ATOM   1222  N   VAL A  80     141.972 117.814 147.758  1.00  0.00         0 N  
ATOM   1223  CA  VAL A  80     141.821 116.428 147.380  1.00  0.00         0 C  
ATOM   1224  C   VAL A  80     143.069 115.801 146.805  1.00  0.00         0 C  
ATOM   1225  O   VAL A  80     143.112 114.577 146.758  1.00  0.00         0 O  
ATOM   1226  CB  VAL A  80     140.596 116.210 146.449  1.00  0.00           C  
ATOM   1227  CG1 VAL A  80     139.282 116.638 147.130  1.00  0.00           C  
ATOM   1228  CG2 VAL A  80     140.713 116.832 145.054  1.00  0.00           C  
ATOM   1229  H   VAL A  80     141.583 118.538 147.161  1.00  0.00         0 H  
ATOM   1230  HB  VAL A  80     140.516 115.133 146.289  1.00  0.00           H  
ATOM   1231 HG11 VAL A  80     138.420 116.399 146.508  1.00  0.00           H  
ATOM   1232 HG12 VAL A  80     139.149 116.125 148.083  1.00  0.00           H  
ATOM   1233 HG13 VAL A  80     139.252 117.709 147.330  1.00  0.00           H  
ATOM   1234 HG21 VAL A  80     139.840 116.608 144.441  1.00  0.00           H  
ATOM   1235 HG22 VAL A  80     140.780 117.905 145.146  1.00  0.00           H  
ATOM   1236 HG23 VAL A  80     141.591 116.479 144.511  1.00  0.00           H  
ATOM   1237  HA  VAL A  80     141.601 115.855 148.284  1.00  0.00           H  
ATOM   1238  N   VAL A  81     144.081 116.593 146.428  1.00  0.00         0 N  
ATOM   1239  CA  VAL A  81     145.347 116.007 146.061  1.00  0.00         0 C  
ATOM   1240  C   VAL A  81     146.189 115.627 147.274  1.00  0.00         0 C  
ATOM   1241  O   VAL A  81     146.946 114.664 147.239  1.00  0.00         0 O  
ATOM   1242  CB  VAL A  81     146.201 116.879 145.087  1.00  0.00         0 C  
ATOM   1243  CG1 VAL A  81     147.203 117.908 145.670  1.00  0.00           C  
ATOM   1244  CG2 VAL A  81     147.036 116.028 144.115  1.00  0.00           C  
ATOM   1245  H   VAL A  81     143.967 117.598 146.420  1.00  0.00         0 H  
ATOM   1246  HA  VAL A  81     145.135 115.083 145.524  1.00  0.00           H  
ATOM   1247  HB3 VAL A  81     145.460 117.378 144.486  1.00  0.00           H  
ATOM   1248 HG11 VAL A  81     147.834 118.325 144.886  1.00  0.00           H  
ATOM   1249 HG12 VAL A  81     146.732 118.749 146.149  1.00  0.00           H  
ATOM   1250 HG13 VAL A  81     147.900 117.468 146.384  1.00  0.00           H  
ATOM   1251 HG21 VAL A  81     147.221 116.558 143.181  1.00  0.00           H  
ATOM   1252 HG22 VAL A  81     148.013 115.826 144.545  1.00  0.00           H  
ATOM   1253 HG23 VAL A  81     146.582 115.067 143.880  1.00  0.00           H  
ATOM   1254  N   ALA A  82     146.074 116.398 148.347  1.00  0.00         0 N  
ATOM   1255  CA  ALA A  82     146.935 116.224 149.493  1.00  0.00         0 C  
ATOM   1256  C   ALA A  82     146.438 115.171 150.467  1.00  0.00         0 C  
ATOM   1257  O   ALA A  82     147.210 114.633 151.257  1.00  0.00         0 O  
ATOM   1258  CB  ALA A  82     146.914 117.570 150.242  1.00  0.00         0 C  
ATOM   1259  H   ALA A  82     145.479 117.217 148.290  1.00  0.00         0 H  
ATOM   1260  HA  ALA A  82     147.958 115.985 149.193  1.00  0.00           H  
ATOM   1261  HB1 ALA A  82     147.471 117.513 151.176  1.00  0.00           H  
ATOM   1262  HB2 ALA A  82     147.357 118.361 149.634  1.00  0.00           H  
ATOM   1263  HB3 ALA A  82     145.896 117.879 150.491  1.00  0.00           H  
ATOM   1264  N   ALA A  83     145.137 114.908 150.417  1.00  0.00         0 N  
ATOM   1265  CA  ALA A  83     144.491 113.932 151.259  1.00  0.00         0 C  
ATOM   1266  C   ALA A  83     145.085 114.017 152.674  1.00  0.00         0 C  
ATOM   1267  O   ALA A  83     145.226 113.011 153.369  1.00  0.00         0 O  
ATOM   1268  CB  ALA A  83     144.563 112.521 150.621  1.00  0.00         0 C  
ATOM   1269  H   ALA A  83     144.571 115.457 149.782  1.00  0.00         0 H  
ATOM   1270  HA  ALA A  83     143.410 114.063 151.205  1.00  0.00           H  
ATOM   1271  HB1 ALA A  83     144.069 111.801 151.274  1.00  0.00           H  
ATOM   1272  HB2 ALA A  83     144.063 112.533 149.652  1.00  0.00           H  
ATOM   1273  HB3 ALA A  83     145.606 112.234 150.488  1.00  0.00           H  
ATOM   1274  N   ILE A  84     145.425 115.238 153.076  1.00  0.00         0 N  
ATOM   1275  CA  ILE A  84     146.004 115.507 154.392  1.00  0.00         0 C  
ATOM   1276  C   ILE A  84     147.002 114.387 154.726  1.00  0.00         0 C  
ATOM   1277  O   ILE A  84     147.146 113.981 155.880  1.00  0.00         0 O  
ATOM   1278  CB  ILE A  84     144.906 115.720 155.472  1.00  0.00         0 C  
ATOM   1279  CG1 ILE A  84     143.727 116.545 154.916  1.00  0.00           C  
ATOM   1280  CG2 ILE A  84     145.494 116.366 156.739  1.00  0.00           C  
ATOM   1281  CD1 ILE A  84     144.014 117.964 154.398  1.00  0.00           C  
ATOM   1282  H   ILE A  84     145.285 116.029 152.463  1.00  0.00         0 H  
ATOM   1283  HA  ILE A  84     146.415 116.516 154.410  1.00  0.00           H  
ATOM   1284  HB3 ILE A  84     144.586 114.754 155.862  1.00  0.00           H  
ATOM   1285 HG12 ILE A  84     142.976 116.677 155.695  1.00  0.00           H  
ATOM   1286 HG13 ILE A  84     143.283 116.021 154.069  1.00  0.00           H  
ATOM   1287 HG21 ILE A  84     144.704 116.504 157.478  1.00  0.00           H  
ATOM   1288 HG22 ILE A  84     146.268 115.718 157.152  1.00  0.00           H  
ATOM   1289 HG23 ILE A  84     145.928 117.334 156.487  1.00  0.00           H  
ATOM   1290 HD11 ILE A  84     143.089 118.415 154.041  1.00  0.00           H  
ATOM   1291 HD12 ILE A  84     144.425 118.570 155.205  1.00  0.00           H  
ATOM   1292 HD13 ILE A  84     144.733 117.914 153.580  1.00  0.00           H  
ATOM   1293  N   GLN A  85     147.682 113.902 153.690  1.00  0.00         0 N  
ATOM   1294  CA  GLN A  85     148.668 112.839 153.824  1.00  0.00         0 C  
ATOM   1295  C   GLN A  85     149.919 113.210 153.013  1.00  0.00         0 C  
ATOM   1296  O   GLN A  85     149.829 113.660 151.871  1.00  0.00         0 O  
ATOM   1297  CB  GLN A  85     148.071 111.467 153.444  1.00  0.00         0 C  
ATOM   1298  CG  GLN A  85     148.987 110.234 153.532  1.00  0.00           C  
ATOM   1299  CD  GLN A  85     148.523 109.034 152.720  1.00  0.00           C  
ATOM   1300  OE1 GLN A  85     147.493 109.077 152.055  1.00  0.00           O  
ATOM   1301  NE2 GLN A  85     149.278 107.941 152.769  1.00  0.00           N  
ATOM   1302  H   GLN A  85     147.523 114.273 152.764  1.00  0.00         0 H  
ATOM   1303  HA  GLN A  85     148.853 112.645 154.881  1.00  0.00           H  
ATOM   1304  HB2 GLN A  85     147.229 111.242 154.099  1.00  0.00           H  
ATOM   1305  HB3 GLN A  85     147.729 111.493 152.410  1.00  0.00           H  
ATOM   1306  HG2 GLN A  85     149.054 109.904 154.569  1.00  0.00           H  
ATOM   1307  HG3 GLN A  85     149.982 110.494 153.169  1.00  0.00           H  
ATOM   1308 HE21 GLN A  85     149.011 107.119 152.247  1.00  0.00           H  
ATOM   1309 HE22 GLN A  85     150.118 107.933 153.329  1.00  0.00           H  
ATOM   1310  N   ASP A  86     151.078 113.008 153.633  1.00  0.00         0 N  
ATOM   1311  CA  ASP A  86     152.385 113.287 153.059  1.00  0.00         0 C  
ATOM   1312  C   ASP A  86     153.364 112.169 153.447  1.00  0.00         0 C  
ATOM   1313  O   ASP A  86     154.584 112.330 153.406  1.00  0.00         0 O  
ATOM   1314  CB  ASP A  86     152.831 114.695 153.501  1.00  0.00         0 C  
ATOM   1315  CG  ASP A  86     152.736 114.991 155.000  1.00  0.00           C  
ATOM   1316  OD1 ASP A  86     152.881 114.025 155.784  1.00  0.00           O1-
ATOM   1317  OD2 ASP A  86     152.480 116.168 155.329  1.00  0.00           O  
ATOM   1318  H   ASP A  86     151.091 112.635 154.572  1.00  0.00         0 H  
ATOM   1319  HA  ASP A  86     152.287 113.431 151.983  1.00  0.00           H  
ATOM   1320  HB2 ASP A  86     153.875 114.848 153.229  1.00  0.00           H  
ATOM   1321  HB3 ASP A  86     152.213 115.444 153.006  1.00  0.00           H  
ATOM   1322  N   ASN A  87     152.799 111.025 153.825  1.00  0.00         0 N  
ATOM   1323  CA  ASN A  87     153.578 109.857 154.226  1.00  0.00         0 C  
ATOM   1324  C   ASN A  87     153.246 108.687 153.291  1.00  0.00         0 C  
ATOM   1325  O   ASN A  87     152.279 107.958 153.496  1.00  0.00         0 O  
ATOM   1326  CB  ASN A  87     153.363 109.543 155.720  1.00  0.00         0 C  
ATOM   1327  CG  ASN A  87     151.916 109.465 156.202  1.00  0.00           C  
ATOM   1328  OD1 ASN A  87     151.153 110.420 156.112  1.00  0.00           O  
ATOM   1329  ND2 ASN A  87     151.504 108.296 156.687  1.00  0.00           N  
ATOM   1330  H   ASN A  87     151.793 110.941 153.842  1.00  0.00         0 H  
ATOM   1331  HA  ASN A  87     154.635 110.120 154.266  1.00  0.00           H  
ATOM   1332  HB2 ASN A  87     153.837 110.316 156.326  1.00  0.00           H  
ATOM   1333  HB3 ASN A  87     153.806 108.575 155.955  1.00  0.00           H  
ATOM   1334 HD21 ASN A  87     150.556 108.192 157.019  1.00  0.00           H  
ATOM   1335 HD22 ASN A  87     152.140 107.512 156.722  1.00  0.00           H  
ATOM   1336  N   ARG A  88     154.072 108.527 152.261  1.00  0.00         0 N  
ATOM   1337  CA  ARG A  88     153.907 107.467 151.274  1.00  0.00         0 C  
ATOM   1338  C   ARG A  88     155.096 107.491 150.299  1.00  0.00         0 C  
ATOM   1339  O   ARG A  88     156.003 108.316 150.411  1.00  0.00         0 O  
ATOM   1340  CB  ARG A  88     152.523 107.574 150.590  1.00  0.00         0 C  
ATOM   1341  CG  ARG A  88     152.154 108.856 149.810  1.00  0.00           C  
ATOM   1342  CD  ARG A  88     150.783 108.946 149.140  1.00  0.00           C  
ATOM   1343  NE  ARG A  88     150.672 110.108 148.253  1.00  0.00           N  
ATOM   1344  CZ  ARG A  88     150.241 111.324 148.635  1.00  0.00           C  
ATOM   1345  NH1 ARG A  88     149.872 111.545 149.916  1.00  0.00           N  
ATOM   1346  NH2 ARG A  88     150.179 112.303 147.710  1.00  0.00           N1+
ATOM   1347  H   ARG A  88     154.854 109.155 152.139  1.00  0.00         0 H  
ATOM   1348  HA  ARG A  88     153.753 106.516 151.783  1.00  0.00           H  
ATOM   1349  HB2 ARG A  88     151.739 107.483 151.341  1.00  0.00           H  
ATOM   1350  HB3 ARG A  88     152.418 106.775 149.856  1.00  0.00           H  
ATOM   1351  HG2 ARG A  88     152.866 109.005 148.998  1.00  0.00           H  
ATOM   1352  HG3 ARG A  88     152.187 109.713 150.483  1.00  0.00           H  
ATOM   1353  HD2 ARG A  88     150.610 108.049 148.545  1.00  0.00           H  
ATOM   1354  HD3 ARG A  88     150.010 109.029 149.904  1.00  0.00           H  
ATOM   1355  HE  ARG A  88     150.947 109.948 147.295  1.00  0.00           H  
ATOM   1356 HH11 ARG A  88     149.549 112.460 150.197  1.00  0.00           H  
ATOM   1357 HH12 ARG A  88     149.918 110.796 150.591  1.00  0.00           H  
ATOM   1358 HH21 ARG A  88     149.859 113.224 147.970  1.00  0.00           H  
ATOM   1359 HH22 ARG A  88     150.453 112.114 146.756  1.00  0.00           H  
ATOM   1360  N   TYR A  89     155.068 106.568 149.341  1.00  0.00         0 N  
ATOM   1361  CA  TYR A  89     156.028 106.405 148.368  1.00  0.00         0 C  
ATOM   1362  C   TYR A  89     155.075 106.590 147.158  1.00  0.00         0 C  
ATOM   1363  O   TYR A  89     153.917 106.178 147.102  1.00  0.00         0 O  
ATOM   1364  CB  TYR A  89     156.677 105.009 148.403  1.00  0.00         0 C  
ATOM   1365  CG  TYR A  89     157.576 104.632 147.241  1.00  0.00           C  
ATOM   1366  CD1 TYR A  89     158.720 105.400 146.960  1.00  0.00           C  
ATOM   1367  CD2 TYR A  89     157.259 103.529 146.429  1.00  0.00           C  
ATOM   1368  CE1 TYR A  89     159.554 105.057 145.882  1.00  0.00           C  
ATOM   1369  CE2 TYR A  89     158.093 103.183 145.352  1.00  0.00           C  
ATOM   1370  CZ  TYR A  89     159.243 103.946 145.079  1.00  0.00           C  
ATOM   1371  OH  TYR A  89     160.057 103.612 144.035  1.00  0.00           O  
ATOM   1372  H   TYR A  89     154.300 105.914 149.293  1.00  0.00         0 H  
ATOM   1373  HA  TYR A  89     156.804 107.169 148.412  1.00  0.00           H  
ATOM   1374  HB2 TYR A  89     155.899 104.246 148.427  1.00  0.00           H  
ATOM   1375  HB3 TYR A  89     157.300 104.920 149.293  1.00  0.00           H  
ATOM   1376  HD1 TYR A  89     158.960 106.256 147.573  1.00  0.00           H  
ATOM   1377  HD2 TYR A  89     156.374 102.945 146.632  1.00  0.00           H  
ATOM   1378  HE1 TYR A  89     160.434 105.646 145.670  1.00  0.00           H  
ATOM   1379  HE2 TYR A  89     157.851 102.332 144.733  1.00  0.00           H  
ATOM   1380  HH  TYR A  89     160.789 104.231 143.988  1.00  0.00           H  
ATOM   1381  N   ILE A  90     155.664 107.251 146.165  1.00  0.00         0 N  
ATOM   1382  CA  ILE A  90     154.988 107.552 144.904  1.00  0.00         0 C  
ATOM   1383  C   ILE A  90     153.749 108.411 145.205  1.00  0.00         0 C  
ATOM   1384  O   ILE A  90     153.850 109.508 145.755  1.00  0.00         0 O  
ATOM   1385  CB  ILE A  90     154.683 106.262 144.091  1.00  0.00         0 C  
ATOM   1386  CG1 ILE A  90     153.771 105.304 144.884  1.00  0.00           C  
ATOM   1387  CG2 ILE A  90     155.982 105.565 143.652  1.00  0.00           C  
ATOM   1388  CD1 ILE A  90     152.993 104.231 144.105  1.00  0.00           C  
ATOM   1389  H   ILE A  90     156.618 107.566 146.265  1.00  0.00         0 H  
ATOM   1390  HA  ILE A  90     155.700 107.992 144.206  1.00  0.00           H  
ATOM   1391  HB3 ILE A  90     154.256 106.533 143.125  1.00  0.00           H  
ATOM   1392 HG12 ILE A  90     154.368 104.748 145.607  1.00  0.00           H  
ATOM   1393 HG13 ILE A  90     153.008 105.878 145.409  1.00  0.00           H  
ATOM   1394 HG21 ILE A  90     155.739 104.666 143.085  1.00  0.00           H  
ATOM   1395 HG22 ILE A  90     156.565 106.241 143.026  1.00  0.00           H  
ATOM   1396 HG23 ILE A  90     156.565 105.293 144.532  1.00  0.00           H  
ATOM   1397 HD11 ILE A  90     152.398 103.637 144.799  1.00  0.00           H  
ATOM   1398 HD12 ILE A  90     152.334 104.712 143.383  1.00  0.00           H  
ATOM   1399 HD13 ILE A  90     153.694 103.582 143.581  1.00  0.00           H  
ATOM   1400  N   LEU A  91     152.586 107.885 144.831  1.00  0.00         0 N  
ATOM   1401  CA  LEU A  91     151.303 108.533 145.024  1.00  0.00         0 C  
ATOM   1402  C   LEU A  91     150.374 107.515 145.680  1.00  0.00         0 C  
ATOM   1403  O   LEU A  91     150.816 106.417 146.021  1.00  0.00         0 O  
ATOM   1404  CB  LEU A  91     150.747 109.143 143.708  1.00  0.00         0 C  
ATOM   1405  CG  LEU A  91     150.672 108.317 142.400  1.00  0.00           C  
ATOM   1406  CD1 LEU A  91     149.612 107.220 142.468  1.00  0.00           C  
ATOM   1407  CD2 LEU A  91     150.421 109.229 141.198  1.00  0.00           C  
ATOM   1408  H   LEU A  91     152.562 106.980 144.383  1.00  0.00         0 H  
ATOM   1409  HA  LEU A  91     151.444 109.464 145.573  1.00  0.00           H  
ATOM   1410  HB2 LEU A  91     149.714 109.457 143.860  1.00  0.00           H  
ATOM   1411  HB3 LEU A  91     151.350 110.004 143.422  1.00  0.00           H  
ATOM   1412  HG  LEU A  91     151.654 107.902 142.175  1.00  0.00           H  
ATOM   1413 HD11 LEU A  91     149.597 106.669 141.528  1.00  0.00           H  
ATOM   1414 HD12 LEU A  91     149.847 106.538 143.285  1.00  0.00           H  
ATOM   1415 HD13 LEU A  91     148.634 107.670 142.640  1.00  0.00           H  
ATOM   1416 HD21 LEU A  91     150.372 108.628 140.290  1.00  0.00           H  
ATOM   1417 HD22 LEU A  91     149.479 109.759 141.334  1.00  0.00           H  
ATOM   1418 HD23 LEU A  91     151.234 109.950 141.113  1.00  0.00           H  
ATOM   1419  N   CYS A  92     149.115 107.915 145.835  1.00  0.00         0 N  
ATOM   1420  CA  CYS A  92     148.086 107.072 146.444  1.00  0.00         0 C  
ATOM   1421  C   CYS A  92     147.145 106.522 145.361  1.00  0.00         0 C  
ATOM   1422  O   CYS A  92     146.202 105.787 145.648  1.00  0.00         0 O  
ATOM   1423  CB  CYS A  92     147.342 107.850 147.544  1.00  0.00         0 C  
ATOM   1424  SG  CYS A  92     147.015 109.580 147.097  1.00  0.00           S  
ATOM   1425  H   CYS A  92     148.836 108.835 145.526  1.00  0.00         0 H  
ATOM   1426  HA  CYS A  92     148.561 106.292 147.039  1.00  0.00           H  
ATOM   1427  HB2 CYS A  92     146.381 107.373 147.740  1.00  0.00           H  
ATOM   1428  HB3 CYS A  92     147.938 107.852 148.456  1.00  0.00           H  
ATOM   1429  HG  CYS A  92     146.391 109.904 148.238  1.00  0.00           H  
ATOM   1430  N   LYS A  93     147.412 106.888 144.110  1.00  0.00         0 N  
ATOM   1431  CA  LYS A  93     146.616 106.453 142.973  1.00  0.00         0 C  
ATOM   1432  C   LYS A  93     145.240 107.130 143.025  1.00  0.00         0 C  
ATOM   1433  O   LYS A  93     144.359 106.843 142.213  1.00  0.00         0 O  
ATOM   1434  CB  LYS A  93     146.537 104.923 142.984  1.00  0.00         0 C  
ATOM   1435  CG  LYS A  93     146.405 104.313 141.585  1.00  0.00           C  
ATOM   1436  CD  LYS A  93     146.323 102.782 141.565  1.00  0.00           C  
ATOM   1437  CE  LYS A  93     145.952 102.163 140.211  1.00  0.00           C  
ATOM   1438  NZ  LYS A  93     145.888 100.692 140.247  1.00  0.00           N1+
ATOM   1439  H   LYS A  93     148.197 107.494 143.918  1.00  0.00         0 H  
ATOM   1440  HA  LYS A  93     147.155 106.664 142.049  1.00  0.00           H  
ATOM   1441  HB2 LYS A  93     145.669 104.608 143.562  1.00  0.00           H  
ATOM   1442  HB3 LYS A  93     147.441 104.516 143.435  1.00  0.00           H  
ATOM   1443  HG2 LYS A  93     145.497 104.685 141.110  1.00  0.00           H  
ATOM   1444  HG3 LYS A  93     147.269 104.592 140.983  1.00  0.00           H  
ATOM   1445  HD2 LYS A  93     147.291 102.362 141.842  1.00  0.00           H  
ATOM   1446  HD3 LYS A  93     145.567 102.448 142.276  1.00  0.00           H  
ATOM   1447  HE2 LYS A  93     144.973 102.529 139.900  1.00  0.00           H  
ATOM   1448  HE3 LYS A  93     146.697 102.444 139.466  1.00  0.00           H  
ATOM   1449  HZ1 LYS A  93     145.640 100.342 139.332  1.00  0.00           H  
ATOM   1450  HZ2 LYS A  93     146.788 100.321 140.516  1.00  0.00           H  
ATOM   1451  HZ3 LYS A  93     145.191 100.401 140.918  1.00  0.00           H  
ATOM   1452  N   THR A  94     145.081 108.027 143.994  1.00  0.00         0 N  
ATOM   1453  CA  THR A  94     143.857 108.778 144.216  1.00  0.00         0 C  
ATOM   1454  C   THR A  94     143.898 110.004 143.296  1.00  0.00         0 C  
ATOM   1455  O   THR A  94     144.136 111.118 143.770  1.00  0.00         0 O  
ATOM   1456  CB  THR A  94     143.675 109.133 145.708  1.00  0.00         0 C  
ATOM   1457  OG1 THR A  94     143.849 107.950 146.494  1.00  0.00           O  
ATOM   1458  CG2 THR A  94     142.303 109.740 146.027  1.00  0.00           C  
ATOM   1459  H   THR A  94     145.840 108.220 144.632  1.00  0.00         0 H  
ATOM   1460  HA  THR A  94     142.997 108.126 144.063  1.00  0.00           H  
ATOM   1461  HB3 THR A  94     144.400 109.896 145.992  1.00  0.00           H  
ATOM   1462  HG1 THR A  94     144.461 107.358 146.051  1.00  0.00           H  
ATOM   1463 HG21 THR A  94     142.243 109.966 147.091  1.00  0.00           H  
ATOM   1464 HG22 THR A  94     142.169 110.658 145.454  1.00  0.00           H  
ATOM   1465 HG23 THR A  94     141.520 109.030 145.762  1.00  0.00           H  
ATOM   1466  N   ALA A  95     143.663 109.758 142.010  1.00  0.00         0 N  
ATOM   1467  CA  ALA A  95     143.662 110.808 140.990  1.00  0.00         0 C  
ATOM   1468  C   ALA A  95     144.786 111.774 141.274  1.00  0.00         0 C  
ATOM   1469  O   ALA A  95     144.648 112.966 141.013  1.00  0.00         0 O  
ATOM   1470  CB  ALA A  95     142.264 111.470 140.883  1.00  0.00         0 C  
ATOM   1471  H   ALA A  95     143.476 108.814 141.703  1.00  0.00         0 H  
ATOM   1472  HA  ALA A  95     143.685 110.353 140.000  1.00  0.00           H  
ATOM   1473  HB1 ALA A  95     142.287 112.247 140.119  1.00  0.00           H  
ATOM   1474  HB2 ALA A  95     141.524 110.717 140.612  1.00  0.00           H  
ATOM   1475  HB3 ALA A  95     141.997 111.913 141.842  1.00  0.00           H  
ATOM   1476  N   CYS A  96     145.908 111.260 141.784  1.00  0.00         0 N  
ATOM   1477  CA  CYS A  96     147.012 112.073 142.225  1.00  0.00         0 C  
ATOM   1478  C   CYS A  96     147.631 112.908 141.115  1.00  0.00         0 C  
ATOM   1479  O   CYS A  96     147.735 114.130 141.219  1.00  0.00         0 O  
ATOM   1480  CB  CYS A  96     148.101 111.217 142.916  1.00  0.00           C  
ATOM   1481  SG  CYS A  96     148.693 111.780 144.536  1.00  0.00           S  
ATOM   1482  H   CYS A  96     145.948 110.285 142.024  1.00  0.00         0 H  
ATOM   1483  HB2 CYS A  96     147.741 110.206 143.064  1.00  0.00           H  
ATOM   1484  HB3 CYS A  96     148.987 111.100 142.289  1.00  0.00           H  
ATOM   1485  HA  CYS A  96     146.642 112.792 142.951  1.00  0.00           H  
ATOM   1486  N   VAL A  97     147.973 112.238 140.011  1.00  0.00         0 N  
ATOM   1487  CA  VAL A  97     148.566 112.906 138.872  1.00  0.00         0 C  
ATOM   1488  C   VAL A  97     147.555 113.742 138.090  1.00  0.00         0 C  
ATOM   1489  O   VAL A  97     147.913 114.717 137.429  1.00  0.00         0 O  
ATOM   1490  CB  VAL A  97     149.287 111.862 137.973  1.00  0.00         0 C  
ATOM   1491  CG1 VAL A  97     150.346 112.445 137.018  1.00  0.00           C  
ATOM   1492  CG2 VAL A  97     149.897 110.724 138.807  1.00  0.00           C  
ATOM   1493  H   VAL A  97     147.856 111.238 139.978  1.00  0.00         0 H  
ATOM   1494  HA  VAL A  97     149.324 113.590 139.260  1.00  0.00           H  
ATOM   1495  HB3 VAL A  97     148.523 111.386 137.355  1.00  0.00           H  
ATOM   1496 HG11 VAL A  97     150.687 111.696 136.305  1.00  0.00           H  
ATOM   1497 HG12 VAL A  97     149.956 113.291 136.458  1.00  0.00           H  
ATOM   1498 HG13 VAL A  97     151.231 112.793 137.554  1.00  0.00           H  
ATOM   1499 HG21 VAL A  97     150.302 109.940 138.168  1.00  0.00           H  
ATOM   1500 HG22 VAL A  97     150.697 111.081 139.457  1.00  0.00           H  
ATOM   1501 HG23 VAL A  97     149.135 110.264 139.436  1.00  0.00           H  
ATOM   1502  N   ALA A  98     146.283 113.365 138.210  1.00  0.00         0 N  
ATOM   1503  CA  ALA A  98     145.199 114.072 137.588  1.00  0.00         0 C  
ATOM   1504  C   ALA A  98     144.962 115.413 138.261  1.00  0.00         0 C  
ATOM   1505  O   ALA A  98     144.906 116.451 137.604  1.00  0.00         0 O  
ATOM   1506  CB  ALA A  98     143.918 113.224 137.655  1.00  0.00         0 C  
ATOM   1507  H   ALA A  98     146.071 112.604 138.835  1.00  0.00         0 H  
ATOM   1508  HA  ALA A  98     145.444 114.250 136.538  1.00  0.00           H  
ATOM   1509  HB1 ALA A  98     143.110 113.710 137.107  1.00  0.00           H  
ATOM   1510  HB2 ALA A  98     144.070 112.243 137.205  1.00  0.00           H  
ATOM   1511  HB3 ALA A  98     143.567 113.075 138.674  1.00  0.00           H  
ATOM   1512  N   ALA A  99     144.903 115.382 139.591  1.00  0.00         0 N  
ATOM   1513  CA  ALA A  99     144.792 116.556 140.418  1.00  0.00         0 C  
ATOM   1514  C   ALA A  99     145.944 117.500 140.236  1.00  0.00         0 C  
ATOM   1515  O   ALA A  99     145.709 118.661 139.939  1.00  0.00         0 O  
ATOM   1516  CB  ALA A  99     144.586 116.129 141.869  1.00  0.00         0 C  
ATOM   1517  H   ALA A  99     144.941 114.481 140.060  1.00  0.00         0 H  
ATOM   1518  HA  ALA A  99     143.890 117.088 140.106  1.00  0.00           H  
ATOM   1519  HB1 ALA A  99     144.553 116.995 142.528  1.00  0.00           H  
ATOM   1520  HB2 ALA A  99     143.643 115.597 141.989  1.00  0.00           H  
ATOM   1521  HB3 ALA A  99     145.374 115.454 142.190  1.00  0.00           H  
ATOM   1522  N   THR A 100     147.174 117.000 140.316  1.00  0.00         0 N  
ATOM   1523  CA  THR A 100     148.356 117.814 140.164  1.00  0.00         0 C  
ATOM   1524  C   THR A 100     148.444 118.605 138.859  1.00  0.00         0 C  
ATOM   1525  O   THR A 100     148.895 119.751 138.839  1.00  0.00         0 O  
ATOM   1526  CB  THR A 100     149.577 116.926 140.509  1.00  0.00         0 C  
ATOM   1527  OG1 THR A 100     149.329 116.306 141.727  1.00  0.00           O  
ATOM   1528  CG2 THR A 100     150.945 117.598 140.620  1.00  0.00           C  
ATOM   1529  H   THR A 100     147.289 116.020 140.555  1.00  0.00         0 H  
ATOM   1530  HA  THR A 100     148.277 118.572 140.945  1.00  0.00           H  
ATOM   1531  HB3 THR A 100     149.660 116.106 139.796  1.00  0.00           H  
ATOM   1532  HG1 THR A 100     148.754 115.557 141.555  1.00  0.00           H  
ATOM   1533 HG21 THR A 100     151.736 116.861 140.764  1.00  0.00           H  
ATOM   1534 HG22 THR A 100     151.177 118.163 139.724  1.00  0.00           H  
ATOM   1535 HG23 THR A 100     150.980 118.279 141.471  1.00  0.00           H  
ATOM   1536  N   PHE A 101     147.898 118.013 137.797  1.00  0.00         0 N  
ATOM   1537  CA  PHE A 101     147.714 118.668 136.530  1.00  0.00         0 C  
ATOM   1538  C   PHE A 101     146.721 119.814 136.578  1.00  0.00         0 C  
ATOM   1539  O   PHE A 101     147.061 120.955 136.260  1.00  0.00         0 O  
ATOM   1540  CB  PHE A 101     147.322 117.616 135.470  1.00  0.00           C  
ATOM   1541  CG  PHE A 101     147.232 118.136 134.047  1.00  0.00           C  
ATOM   1542  CD1 PHE A 101     148.410 118.410 133.322  1.00  0.00           C  
ATOM   1543  CD2 PHE A 101     145.973 118.341 133.441  1.00  0.00           C  
ATOM   1544  CE1 PHE A 101     148.328 118.848 131.987  1.00  0.00           C  
ATOM   1545  CE2 PHE A 101     145.895 118.804 132.114  1.00  0.00           C  
ATOM   1546  CZ  PHE A 101     147.073 119.052 131.383  1.00  0.00           C  
ATOM   1547  H   PHE A 101     147.505 117.088 137.910  1.00  0.00         0 H  
ATOM   1548  HB2 PHE A 101     148.059 116.810 135.473  1.00  0.00           H  
ATOM   1549  HB3 PHE A 101     146.376 117.142 135.724  1.00  0.00           H  
ATOM   1550  HD1 PHE A 101     149.379 118.262 133.778  1.00  0.00           H  
ATOM   1551  HD2 PHE A 101     145.062 118.142 133.990  1.00  0.00           H  
ATOM   1552  HE1 PHE A 101     149.233 119.016 131.426  1.00  0.00           H  
ATOM   1553  HE2 PHE A 101     144.930 118.957 131.653  1.00  0.00           H  
ATOM   1554  HZ  PHE A 101     147.012 119.392 130.359  1.00  0.00           H  
ATOM   1555  HA  PHE A 101     148.673 119.095 136.231  1.00  0.00           H  
ATOM   1556  N   PHE A 102     145.505 119.515 137.028  1.00  0.00         0 N  
ATOM   1557  CA  PHE A 102     144.456 120.507 137.123  1.00  0.00         0 C  
ATOM   1558  C   PHE A 102     144.753 121.592 138.132  1.00  0.00         0 C  
ATOM   1559  O   PHE A 102     144.464 122.754 137.873  1.00  0.00         0 O  
ATOM   1560  CB  PHE A 102     143.120 119.821 137.468  1.00  0.00           C  
ATOM   1561  CG  PHE A 102     142.541 119.013 136.320  1.00  0.00           C  
ATOM   1562  CD1 PHE A 102     142.298 119.628 135.072  1.00  0.00           C  
ATOM   1563  CD2 PHE A 102     142.249 117.644 136.490  1.00  0.00           C  
ATOM   1564  CE1 PHE A 102     141.807 118.871 133.992  1.00  0.00           C  
ATOM   1565  CE2 PHE A 102     141.755 116.887 135.410  1.00  0.00           C  
ATOM   1566  CZ  PHE A 102     141.541 117.499 134.159  1.00  0.00           C  
ATOM   1567  H   PHE A 102     145.294 118.560 137.297  1.00  0.00         0 H  
ATOM   1568  HB2 PHE A 102     143.233 119.191 138.352  1.00  0.00           H  
ATOM   1569  HB3 PHE A 102     142.374 120.568 137.738  1.00  0.00           H  
ATOM   1570  HD1 PHE A 102     142.493 120.681 134.928  1.00  0.00           H  
ATOM   1571  HD2 PHE A 102     142.411 117.165 137.445  1.00  0.00           H  
ATOM   1572  HE1 PHE A 102     141.637 119.344 133.035  1.00  0.00           H  
ATOM   1573  HE2 PHE A 102     141.543 115.836 135.540  1.00  0.00           H  
ATOM   1574  HZ  PHE A 102     141.166 116.917 133.329  1.00  0.00           H  
ATOM   1575  HA  PHE A 102     144.367 121.002 136.156  1.00  0.00           H  
ATOM   1576  N   ILE A 103     145.409 121.225 139.230  1.00  0.00         0 N  
ATOM   1577  CA  ILE A 103     145.908 122.152 140.211  1.00  0.00         0 C  
ATOM   1578  C   ILE A 103     146.835 123.187 139.600  1.00  0.00         0 C  
ATOM   1579  O   ILE A 103     146.583 124.384 139.695  1.00  0.00         0 O  
ATOM   1580  CB  ILE A 103     146.590 121.455 141.412  1.00  0.00         0 C  
ATOM   1581  CG1 ILE A 103     145.536 120.746 142.244  1.00  0.00           C  
ATOM   1582  CG2 ILE A 103     147.367 122.408 142.349  1.00  0.00           C  
ATOM   1583  CD1 ILE A 103     146.140 119.675 143.118  1.00  0.00           C  
ATOM   1584  H   ILE A 103     145.599 120.233 139.376  1.00  0.00         0 H  
ATOM   1585  HA  ILE A 103     145.047 122.706 140.593  1.00  0.00           H  
ATOM   1586  HB3 ILE A 103     147.294 120.723 141.016  1.00  0.00           H  
ATOM   1587 HG12 ILE A 103     144.980 121.465 142.847  1.00  0.00           H  
ATOM   1588 HG13 ILE A 103     144.807 120.273 141.599  1.00  0.00           H  
ATOM   1589 HG21 ILE A 103     147.871 121.877 143.153  1.00  0.00           H  
ATOM   1590 HG22 ILE A 103     148.154 122.957 141.837  1.00  0.00           H  
ATOM   1591 HG23 ILE A 103     146.698 123.142 142.801  1.00  0.00           H  
ATOM   1592 HD11 ILE A 103     145.315 119.200 143.620  1.00  0.00           H  
ATOM   1593 HD12 ILE A 103     146.677 118.917 142.557  1.00  0.00           H  
ATOM   1594 HD13 ILE A 103     146.815 120.083 143.862  1.00  0.00           H  
ATOM   1595  N   HIS A 104     147.895 122.698 138.965  1.00  0.00         0 N  
ATOM   1596  CA  HIS A 104     148.908 123.516 138.343  1.00  0.00         0 C  
ATOM   1597  C   HIS A 104     148.344 124.437 137.272  1.00  0.00         0 C  
ATOM   1598  O   HIS A 104     148.654 125.627 137.239  1.00  0.00         0 O  
ATOM   1599  CB  HIS A 104     149.980 122.563 137.750  1.00  0.00           C  
ATOM   1600  CG  HIS A 104     151.088 123.145 136.895  1.00  0.00           C  
ATOM   1601  ND1 HIS A 104     151.608 122.445 135.799  1.00  0.00           N  
ATOM   1602  CD2 HIS A 104     151.783 124.332 137.023  1.00  0.00           C  
ATOM   1603  CE1 HIS A 104     152.562 123.218 135.302  1.00  0.00           C  
ATOM   1604  NE2 HIS A 104     152.715 124.343 135.995  1.00  0.00           N  
ATOM   1605  H   HIS A 104     148.000 121.691 138.893  1.00  0.00         0 H  
ATOM   1606  HB2 HIS A 104     150.459 122.002 138.552  1.00  0.00           H  
ATOM   1607  HB3 HIS A 104     149.482 121.818 137.128  1.00  0.00           H  
ATOM   1608  HD2 HIS A 104     151.692 125.129 137.745  1.00  0.00           H  
ATOM   1609  HE1 HIS A 104     153.156 122.962 134.434  1.00  0.00           H  
ATOM   1610  HE2 HIS A 104     153.410 125.061 135.769  1.00  0.00           H  
ATOM   1611  HA  HIS A 104     149.371 124.142 139.106  1.00  0.00           H  
ATOM   1612  N   PHE A 105     147.444 123.885 136.464  1.00  0.00         0 N  
ATOM   1613  CA  PHE A 105     146.734 124.599 135.436  1.00  0.00         0 C  
ATOM   1614  C   PHE A 105     145.817 125.672 135.967  1.00  0.00         0 C  
ATOM   1615  O   PHE A 105     145.941 126.823 135.552  1.00  0.00         0 O  
ATOM   1616  CB  PHE A 105     145.941 123.571 134.588  1.00  0.00           C  
ATOM   1617  CG  PHE A 105     144.935 124.141 133.595  1.00  0.00           C  
ATOM   1618  CD1 PHE A 105     145.360 125.000 132.560  1.00  0.00           C  
ATOM   1619  CD2 PHE A 105     143.561 123.853 133.740  1.00  0.00           C  
ATOM   1620  CE1 PHE A 105     144.414 125.577 131.690  1.00  0.00           C  
ATOM   1621  CE2 PHE A 105     142.620 124.422 132.861  1.00  0.00           C  
ATOM   1622  CZ  PHE A 105     143.046 125.288 131.837  1.00  0.00           C  
ATOM   1623  H   PHE A 105     147.277 122.886 136.545  1.00  0.00         0 H  
ATOM   1624  HB2 PHE A 105     146.641 122.943 134.035  1.00  0.00           H  
ATOM   1625  HB3 PHE A 105     145.406 122.894 135.252  1.00  0.00           H  
ATOM   1626  HD1 PHE A 105     146.410 125.232 132.451  1.00  0.00           H  
ATOM   1627  HD2 PHE A 105     143.214 123.214 134.541  1.00  0.00           H  
ATOM   1628  HE1 PHE A 105     144.730 126.244 130.905  1.00  0.00           H  
ATOM   1629  HE2 PHE A 105     141.569 124.203 132.983  1.00  0.00           H  
ATOM   1630  HZ  PHE A 105     142.323 125.731 131.167  1.00  0.00           H  
ATOM   1631  HA  PHE A 105     147.470 125.079 134.787  1.00  0.00           H  
ATOM   1632  N   PHE A 106     144.939 125.311 136.904  1.00  0.00         0 N  
ATOM   1633  CA  PHE A 106     144.026 126.263 137.497  1.00  0.00         0 C  
ATOM   1634  C   PHE A 106     144.760 127.319 138.316  1.00  0.00         0 C  
ATOM   1635  O   PHE A 106     144.330 128.469 138.391  1.00  0.00         0 O  
ATOM   1636  CB  PHE A 106     142.963 125.567 138.375  1.00  0.00           C  
ATOM   1637  CG  PHE A 106     141.910 124.762 137.623  1.00  0.00           C  
ATOM   1638  CD1 PHE A 106     141.249 125.309 136.500  1.00  0.00           C  
ATOM   1639  CD2 PHE A 106     141.560 123.468 138.064  1.00  0.00           C  
ATOM   1640  CE1 PHE A 106     140.282 124.558 135.807  1.00  0.00           C  
ATOM   1641  CE2 PHE A 106     140.596 122.716 137.366  1.00  0.00           C  
ATOM   1642  CZ  PHE A 106     139.959 123.257 136.235  1.00  0.00           C  
ATOM   1643  H   PHE A 106     144.880 124.342 137.212  1.00  0.00         0 H  
ATOM   1644  HB2 PHE A 106     143.452 124.940 139.123  1.00  0.00           H  
ATOM   1645  HB3 PHE A 106     142.413 126.322 138.940  1.00  0.00           H  
ATOM   1646  HD1 PHE A 106     141.473 126.309 136.156  1.00  0.00           H  
ATOM   1647  HD2 PHE A 106     142.043 123.040 138.931  1.00  0.00           H  
ATOM   1648  HE1 PHE A 106     139.788 124.982 134.945  1.00  0.00           H  
ATOM   1649  HE2 PHE A 106     140.346 121.719 137.692  1.00  0.00           H  
ATOM   1650  HZ  PHE A 106     139.221 122.677 135.701  1.00  0.00           H  
ATOM   1651  HA  PHE A 106     143.524 126.782 136.688  1.00  0.00           H  
ATOM   1652  N   TYR A 107     145.917 126.953 138.867  1.00  0.00         0 N  
ATOM   1653  CA  TYR A 107     146.789 127.896 139.509  1.00  0.00         0 C  
ATOM   1654  C   TYR A 107     147.478 128.862 138.571  1.00  0.00         0 C  
ATOM   1655  O   TYR A 107     147.457 130.070 138.807  1.00  0.00         0 O  
ATOM   1656  CB  TYR A 107     147.875 127.203 140.375  1.00  0.00           C  
ATOM   1657  CG  TYR A 107     147.498 126.488 141.671  1.00  0.00           C  
ATOM   1658  CD1 TYR A 107     146.293 126.743 142.367  1.00  0.00           C  
ATOM   1659  CD2 TYR A 107     148.436 125.600 142.242  1.00  0.00           C  
ATOM   1660  CE1 TYR A 107     146.030 126.102 143.596  1.00  0.00           C  
ATOM   1661  CE2 TYR A 107     148.170 124.956 143.467  1.00  0.00           C  
ATOM   1662  CZ  TYR A 107     146.958 125.198 144.139  1.00  0.00           C  
ATOM   1663  OH  TYR A 107     146.672 124.573 145.317  1.00  0.00           O  
ATOM   1664  H   TYR A 107     146.189 125.973 138.857  1.00  0.00         0 H  
ATOM   1665  HB2 TYR A 107     148.477 126.536 139.757  1.00  0.00           H  
ATOM   1666  HB3 TYR A 107     148.556 127.975 140.729  1.00  0.00           H  
ATOM   1667  HD1 TYR A 107     145.557 127.434 141.987  1.00  0.00           H  
ATOM   1668  HD2 TYR A 107     149.374 125.411 141.742  1.00  0.00           H  
ATOM   1669  HE1 TYR A 107     145.113 126.306 144.130  1.00  0.00           H  
ATOM   1670  HE2 TYR A 107     148.900 124.272 143.875  1.00  0.00           H  
ATOM   1671  HH  TYR A 107     147.421 124.222 145.776  1.00  0.00           H  
ATOM   1672  HA  TYR A 107     146.187 128.529 140.161  1.00  0.00           H  
ATOM   1673  N   LEU A 108     148.054 128.352 137.485  1.00  0.00         0 N  
ATOM   1674  CA  LEU A 108     148.603 129.195 136.448  1.00  0.00         0 C  
ATOM   1675  C   LEU A 108     147.536 130.082 135.831  1.00  0.00         0 C  
ATOM   1676  O   LEU A 108     147.793 131.255 135.569  1.00  0.00         0 O  
ATOM   1677  CB  LEU A 108     149.187 128.339 135.291  1.00  0.00           C  
ATOM   1678  CG  LEU A 108     150.608 127.784 135.480  1.00  0.00           C  
ATOM   1679  CD1 LEU A 108     150.946 126.819 134.331  1.00  0.00           C  
ATOM   1680  CD2 LEU A 108     151.661 128.903 135.551  1.00  0.00           C  
ATOM   1681  H   LEU A 108     148.061 127.342 137.345  1.00  0.00         0 H  
ATOM   1682  HB2 LEU A 108     148.506 127.512 135.086  1.00  0.00           H  
ATOM   1683  HB3 LEU A 108     149.199 128.922 134.367  1.00  0.00           H  
ATOM   1684  HG  LEU A 108     150.634 127.211 136.406  1.00  0.00           H  
ATOM   1685 HD11 LEU A 108     151.964 126.438 134.417  1.00  0.00           H  
ATOM   1686 HD12 LEU A 108     150.279 125.954 134.332  1.00  0.00           H  
ATOM   1687 HD13 LEU A 108     150.862 127.303 133.357  1.00  0.00           H  
ATOM   1688 HD21 LEU A 108     152.665 128.482 135.544  1.00  0.00           H  
ATOM   1689 HD22 LEU A 108     151.589 129.578 134.698  1.00  0.00           H  
ATOM   1690 HD23 LEU A 108     151.568 129.500 136.458  1.00  0.00           H  
ATOM   1691  HA  LEU A 108     149.372 129.841 136.871  1.00  0.00           H  
ATOM   1692  N   SER A 109     146.341 129.528 135.616  1.00  0.00         0 N  
ATOM   1693  CA  SER A 109     145.247 130.272 135.060  1.00  0.00         0 C  
ATOM   1694  C   SER A 109     144.798 131.429 135.920  1.00  0.00         0 C  
ATOM   1695  O   SER A 109     144.656 132.528 135.397  1.00  0.00         0 O  
ATOM   1696  CB  SER A 109     144.080 129.371 134.593  1.00  0.00           C  
ATOM   1697  OG  SER A 109     143.191 128.919 135.598  1.00  0.00           O  
ATOM   1698  H   SER A 109     146.186 128.539 135.813  1.00  0.00         0 H  
ATOM   1699  HB2 SER A 109     143.484 129.945 133.882  1.00  0.00           H  
ATOM   1700  HB3 SER A 109     144.461 128.512 134.041  1.00  0.00           H  
ATOM   1701  HG  SER A 109     142.533 129.582 135.782  1.00  0.00           H  
ATOM   1702  HA  SER A 109     145.635 130.720 134.143  1.00  0.00           H  
ATOM   1703  N   VAL A 110     144.714 131.226 137.237  1.00  0.00         0 N  
ATOM   1704  CA  VAL A 110     144.581 132.318 138.177  1.00  0.00         0 C  
ATOM   1705  C   VAL A 110     145.644 133.397 138.016  1.00  0.00         0 C  
ATOM   1706  O   VAL A 110     145.328 134.585 137.997  1.00  0.00         0 O  
ATOM   1707  CB  VAL A 110     144.587 131.812 139.673  1.00  0.00         0 C  
ATOM   1708  CG1 VAL A 110     144.894 132.881 140.751  1.00  0.00           C  
ATOM   1709  CG2 VAL A 110     143.288 131.136 140.103  1.00  0.00           C  
ATOM   1710  H   VAL A 110     144.794 130.276 137.591  1.00  0.00         0 H  
ATOM   1711  HA  VAL A 110     143.615 132.789 137.994  1.00  0.00           H  
ATOM   1712  HB3 VAL A 110     145.369 131.062 139.769  1.00  0.00           H  
ATOM   1713 HG11 VAL A 110     144.751 132.490 141.760  1.00  0.00           H  
ATOM   1714 HG12 VAL A 110     145.933 133.201 140.710  1.00  0.00           H  
ATOM   1715 HG13 VAL A 110     144.257 133.760 140.648  1.00  0.00           H  
ATOM   1716 HG21 VAL A 110     143.327 130.809 141.143  1.00  0.00           H  
ATOM   1717 HG22 VAL A 110     142.439 131.811 140.007  1.00  0.00           H  
ATOM   1718 HG23 VAL A 110     143.124 130.242 139.523  1.00  0.00           H  
ATOM   1719  N   PHE A 111     146.903 132.982 137.908  1.00  0.00         0 N  
ATOM   1720  CA  PHE A 111     147.990 133.919 137.770  1.00  0.00         0 C  
ATOM   1721  C   PHE A 111     147.936 134.740 136.491  1.00  0.00         0 C  
ATOM   1722  O   PHE A 111     148.020 135.970 136.523  1.00  0.00         0 O  
ATOM   1723  CB  PHE A 111     149.372 133.218 137.838  1.00  0.00           C  
ATOM   1724  CG  PHE A 111     149.883 132.912 139.233  1.00  0.00           C  
ATOM   1725  CD1 PHE A 111     150.210 133.967 140.111  1.00  0.00           C  
ATOM   1726  CD2 PHE A 111     150.062 131.578 139.652  1.00  0.00           C  
ATOM   1727  CE1 PHE A 111     150.664 133.688 141.413  1.00  0.00           C  
ATOM   1728  CE2 PHE A 111     150.507 131.300 140.957  1.00  0.00           C  
ATOM   1729  CZ  PHE A 111     150.798 132.354 141.839  1.00  0.00           C  
ATOM   1730  H   PHE A 111     147.104 131.990 137.982  1.00  0.00         0 H  
ATOM   1731  HB2 PHE A 111     149.377 132.309 137.238  1.00  0.00           H  
ATOM   1732  HB3 PHE A 111     150.137 133.853 137.386  1.00  0.00           H  
ATOM   1733  HD1 PHE A 111     150.111 134.995 139.793  1.00  0.00           H  
ATOM   1734  HD2 PHE A 111     149.850 130.760 138.982  1.00  0.00           H  
ATOM   1735  HE1 PHE A 111     150.896 134.498 142.089  1.00  0.00           H  
ATOM   1736  HE2 PHE A 111     150.619 130.279 141.285  1.00  0.00           H  
ATOM   1737  HZ  PHE A 111     151.123 132.134 142.844  1.00  0.00           H  
ATOM   1738  HA  PHE A 111     147.934 134.638 138.586  1.00  0.00           H  
ATOM   1739  N   PHE A 112     147.722 134.055 135.372  1.00  0.00         0 N  
ATOM   1740  CA  PHE A 112     147.472 134.691 134.098  1.00  0.00         0 C  
ATOM   1741  C   PHE A 112     146.206 135.548 134.093  1.00  0.00         0 C  
ATOM   1742  O   PHE A 112     146.141 136.588 133.429  1.00  0.00         0 O  
ATOM   1743  CB  PHE A 112     147.452 133.632 132.972  1.00  0.00           C  
ATOM   1744  CG  PHE A 112     148.834 133.258 132.442  1.00  0.00           C  
ATOM   1745  CD1 PHE A 112     149.477 134.107 131.519  1.00  0.00           C  
ATOM   1746  CD2 PHE A 112     149.482 132.070 132.845  1.00  0.00           C  
ATOM   1747  CE1 PHE A 112     150.733 133.759 130.984  1.00  0.00           C  
ATOM   1748  CE2 PHE A 112     150.735 131.717 132.311  1.00  0.00           C  
ATOM   1749  CZ  PHE A 112     151.360 132.560 131.375  1.00  0.00           C  
ATOM   1750  H   PHE A 112     147.651 133.039 135.432  1.00  0.00         0 H  
ATOM   1751  HB2 PHE A 112     146.916 132.738 133.293  1.00  0.00           H  
ATOM   1752  HB3 PHE A 112     146.883 134.006 132.118  1.00  0.00           H  
ATOM   1753  HD1 PHE A 112     149.007 135.031 131.215  1.00  0.00           H  
ATOM   1754  HD2 PHE A 112     149.023 131.406 133.554  1.00  0.00           H  
ATOM   1755  HE1 PHE A 112     151.217 134.413 130.273  1.00  0.00           H  
ATOM   1756  HE2 PHE A 112     151.216 130.799 132.617  1.00  0.00           H  
ATOM   1757  HZ  PHE A 112     152.322 132.290 130.962  1.00  0.00           H  
ATOM   1758  HA  PHE A 112     148.296 135.380 133.899  1.00  0.00           H  
ATOM   1759  N   TRP A 113     145.229 135.158 134.910  1.00  0.00         0 N  
ATOM   1760  CA  TRP A 113     144.083 135.969 135.205  1.00  0.00         0 C  
ATOM   1761  C   TRP A 113     144.354 137.269 135.933  1.00  0.00         0 C  
ATOM   1762  O   TRP A 113     143.856 138.327 135.538  1.00  0.00         0 O  
ATOM   1763  CB  TRP A 113     142.919 135.190 135.850  1.00  0.00           C  
ATOM   1764  CG  TRP A 113     142.014 134.448 134.910  1.00  0.00           C  
ATOM   1765  CD1 TRP A 113     141.696 133.136 134.987  1.00  0.00           C  
ATOM   1766  CD2 TRP A 113     141.257 134.974 133.775  1.00  0.00           C  
ATOM   1767  NE1 TRP A 113     140.824 132.809 133.970  1.00  0.00           N  
ATOM   1768  CE2 TRP A 113     140.523 133.901 133.184  1.00  0.00           C  
ATOM   1769  CE3 TRP A 113     141.101 136.253 133.187  1.00  0.00           C  
ATOM   1770  CZ2 TRP A 113     139.685 134.088 132.072  1.00  0.00           C  
ATOM   1771  CZ3 TRP A 113     140.259 136.453 132.075  1.00  0.00           C  
ATOM   1772  CH2 TRP A 113     139.551 135.372 131.518  1.00  0.00           C  
ATOM   1773  H   TRP A 113     145.266 134.228 135.322  1.00  0.00         0 H  
ATOM   1774  HB2 TRP A 113     143.261 134.523 136.632  1.00  0.00           H  
ATOM   1775  HB3 TRP A 113     142.257 135.901 136.337  1.00  0.00           H  
ATOM   1776  HD1 TRP A 113     142.070 132.457 135.739  1.00  0.00           H  
ATOM   1777  HE1 TRP A 113     140.440 131.873 133.863  1.00  0.00           H  
ATOM   1778  HE3 TRP A 113     141.630 137.097 133.603  1.00  0.00           H  
ATOM   1779  HZ2 TRP A 113     139.124 133.264 131.661  1.00  0.00           H  
ATOM   1780  HZ3 TRP A 113     140.151 137.442 131.656  1.00  0.00           H  
ATOM   1781  HH2 TRP A 113     138.892 135.527 130.677  1.00  0.00           H  
ATOM   1782  HA  TRP A 113     143.710 136.295 134.233  1.00  0.00           H  
ATOM   1783  N   MET A 114     145.192 137.202 136.960  1.00  0.00         0 N  
ATOM   1784  CA  MET A 114     145.583 138.366 137.725  1.00  0.00         0 C  
ATOM   1785  C   MET A 114     146.359 139.404 136.926  1.00  0.00         0 C  
ATOM   1786  O   MET A 114     146.252 140.606 137.163  1.00  0.00         0 O  
ATOM   1787  CB  MET A 114     146.341 137.938 138.997  1.00  0.00           C  
ATOM   1788  CG  MET A 114     145.403 137.286 140.031  1.00  0.00           C  
ATOM   1789  SD  MET A 114     146.122 136.922 141.652  1.00  0.00           S  
ATOM   1790  CE  MET A 114     147.526 135.860 141.228  1.00  0.00           C  
ATOM   1791  H   MET A 114     145.516 136.281 137.250  1.00  0.00         0 H  
ATOM   1792  HB2 MET A 114     147.164 137.271 138.743  1.00  0.00           H  
ATOM   1793  HB3 MET A 114     146.787 138.816 139.466  1.00  0.00           H  
ATOM   1794  HG2 MET A 114     144.558 137.949 140.216  1.00  0.00           H  
ATOM   1795  HG3 MET A 114     144.972 136.367 139.643  1.00  0.00           H  
ATOM   1796  HE1 MET A 114     148.009 135.493 142.134  1.00  0.00           H  
ATOM   1797  HE2 MET A 114     147.194 135.001 140.653  1.00  0.00           H  
ATOM   1798  HE3 MET A 114     148.267 136.410 140.649  1.00  0.00           H  
ATOM   1799  HA  MET A 114     144.669 138.874 138.044  1.00  0.00           H  
ATOM   1800  N   LEU A 115     147.070 138.924 135.914  1.00  0.00         0 N  
ATOM   1801  CA  LEU A 115     147.782 139.746 134.967  1.00  0.00         0 C  
ATOM   1802  C   LEU A 115     146.885 140.512 134.026  1.00  0.00         0 C  
ATOM   1803  O   LEU A 115     147.169 141.658 133.691  1.00  0.00         0 O  
ATOM   1804  CB  LEU A 115     148.702 138.792 134.169  1.00  0.00           C  
ATOM   1805  CG  LEU A 115     149.761 139.455 133.268  1.00  0.00           C  
ATOM   1806  CD1 LEU A 115     150.866 140.137 134.086  1.00  0.00           C  
ATOM   1807  CD2 LEU A 115     150.356 138.424 132.297  1.00  0.00           C  
ATOM   1808  H   LEU A 115     147.133 137.916 135.826  1.00  0.00         0 H  
ATOM   1809  HB2 LEU A 115     149.214 138.123 134.861  1.00  0.00           H  
ATOM   1810  HB3 LEU A 115     148.085 138.144 133.548  1.00  0.00           H  
ATOM   1811  HG  LEU A 115     149.281 140.216 132.656  1.00  0.00           H  
ATOM   1812 HD11 LEU A 115     151.646 140.520 133.430  1.00  0.00           H  
ATOM   1813 HD12 LEU A 115     150.483 140.981 134.661  1.00  0.00           H  
ATOM   1814 HD13 LEU A 115     151.335 139.446 134.786  1.00  0.00           H  
ATOM   1815 HD21 LEU A 115     151.108 138.875 131.650  1.00  0.00           H  
ATOM   1816 HD22 LEU A 115     150.825 137.598 132.830  1.00  0.00           H  
ATOM   1817 HD23 LEU A 115     149.586 137.999 131.651  1.00  0.00           H  
ATOM   1818  HA  LEU A 115     148.391 140.460 135.522  1.00  0.00           H  
ATOM   1819  N   THR A 116     145.772 139.899 133.644  1.00  0.00         0 N  
ATOM   1820  CA  THR A 116     144.806 140.510 132.752  1.00  0.00         0 C  
ATOM   1821  C   THR A 116     144.145 141.701 133.425  1.00  0.00         0 C  
ATOM   1822  O   THR A 116     144.008 142.762 132.822  1.00  0.00         0 O  
ATOM   1823  CB  THR A 116     143.761 139.427 132.327  1.00  0.00         0 C  
ATOM   1824  OG1 THR A 116     144.383 138.352 131.627  1.00  0.00           O  
ATOM   1825  CG2 THR A 116     142.669 139.944 131.376  1.00  0.00           C  
ATOM   1826  H   THR A 116     145.584 138.972 134.002  1.00  0.00         0 H  
ATOM   1827  HA  THR A 116     145.324 140.870 131.860  1.00  0.00           H  
ATOM   1828  HB3 THR A 116     143.265 139.018 133.207  1.00  0.00           H  
ATOM   1829  HG1 THR A 116     144.974 137.882 132.208  1.00  0.00           H  
ATOM   1830 HG21 THR A 116     141.986 139.140 131.102  1.00  0.00           H  
ATOM   1831 HG22 THR A 116     142.066 140.729 131.832  1.00  0.00           H  
ATOM   1832 HG23 THR A 116     143.098 140.345 130.457  1.00  0.00           H  
ATOM   1833  N   LEU A 117     143.848 141.540 134.713  1.00  0.00         0 N  
ATOM   1834  CA  LEU A 117     143.348 142.596 135.557  1.00  0.00         0 C  
ATOM   1835  C   LEU A 117     144.357 143.718 135.759  1.00  0.00         0 C  
ATOM   1836  O   LEU A 117     143.996 144.891 135.771  1.00  0.00         0 O  
ATOM   1837  CB  LEU A 117     142.910 141.954 136.905  1.00  0.00           C  
ATOM   1838  CG  LEU A 117     141.932 142.783 137.781  1.00  0.00           C  
ATOM   1839  CD1 LEU A 117     140.939 141.875 138.532  1.00  0.00           C  
ATOM   1840  CD2 LEU A 117     142.660 143.676 138.799  1.00  0.00           C  
ATOM   1841  H   LEU A 117     144.040 140.640 135.137  1.00  0.00         0 H  
ATOM   1842  HB2 LEU A 117     142.413 141.012 136.666  1.00  0.00           H  
ATOM   1843  HB3 LEU A 117     143.781 141.662 137.496  1.00  0.00           H  
ATOM   1844  HG  LEU A 117     141.341 143.422 137.125  1.00  0.00           H  
ATOM   1845 HD11 LEU A 117     140.232 142.461 139.120  1.00  0.00           H  
ATOM   1846 HD12 LEU A 117     140.354 141.261 137.849  1.00  0.00           H  
ATOM   1847 HD13 LEU A 117     141.458 141.202 139.217  1.00  0.00           H  
ATOM   1848 HD21 LEU A 117     141.953 144.287 139.362  1.00  0.00           H  
ATOM   1849 HD22 LEU A 117     143.224 143.081 139.519  1.00  0.00           H  
ATOM   1850 HD23 LEU A 117     143.359 144.355 138.318  1.00  0.00           H  
ATOM   1851  HA  LEU A 117     142.468 143.016 135.066  1.00  0.00           H  
ATOM   1852  N   GLY A 118     145.634 143.366 135.840  1.00  0.00         0 N  
ATOM   1853  CA  GLY A 118     146.684 144.337 135.989  1.00  0.00         0 C  
ATOM   1854  C   GLY A 118     146.999 145.141 134.750  1.00  0.00         0 C  
ATOM   1855  O   GLY A 118     147.038 146.374 134.785  1.00  0.00         0 O  
ATOM   1856  H   GLY A 118     145.875 142.382 135.875  1.00  0.00         0 H  
ATOM   1857  HA3 GLY A 118     147.590 143.812 136.294  1.00  0.00           H  
ATOM   1858  HA2 GLY A 118     146.441 145.017 136.808  1.00  0.00           H  
ATOM   1859  N   LEU A 119     147.161 144.433 133.633  1.00  0.00         0 N  
ATOM   1860  CA  LEU A 119     147.379 145.027 132.330  1.00  0.00         0 C  
ATOM   1861  C   LEU A 119     146.220 145.899 131.879  1.00  0.00         0 C  
ATOM   1862  O   LEU A 119     146.424 146.927 131.239  1.00  0.00         0 O  
ATOM   1863  CB  LEU A 119     147.737 143.939 131.300  1.00  0.00         0 C  
ATOM   1864  CG  LEU A 119     149.092 143.231 131.564  1.00  0.00           C  
ATOM   1865  CD1 LEU A 119     149.289 142.075 130.572  1.00  0.00           C  
ATOM   1866  CD2 LEU A 119     150.299 144.185 131.518  1.00  0.00           C  
ATOM   1867  H   LEU A 119     147.117 143.415 133.690  1.00  0.00         0 H  
ATOM   1868  HA  LEU A 119     148.226 145.706 132.422  1.00  0.00           H  
ATOM   1869  HB2 LEU A 119     146.935 143.199 131.273  1.00  0.00           H  
ATOM   1870  HB3 LEU A 119     147.763 144.383 130.303  1.00  0.00           H  
ATOM   1871  HG  LEU A 119     149.078 142.795 132.562  1.00  0.00           H  
ATOM   1872 HD11 LEU A 119     150.212 141.531 130.777  1.00  0.00           H  
ATOM   1873 HD12 LEU A 119     148.468 141.358 130.633  1.00  0.00           H  
ATOM   1874 HD13 LEU A 119     149.338 142.436 129.544  1.00  0.00           H  
ATOM   1875 HD21 LEU A 119     151.235 143.634 131.605  1.00  0.00           H  
ATOM   1876 HD22 LEU A 119     150.332 144.745 130.583  1.00  0.00           H  
ATOM   1877 HD23 LEU A 119     150.286 144.901 132.340  1.00  0.00           H  
ATOM   1878  N   MET A 120     145.020 145.549 132.328  1.00  0.00         0 N  
ATOM   1879  CA  MET A 120     143.829 146.336 132.160  1.00  0.00         0 C  
ATOM   1880  C   MET A 120     143.848 147.690 132.839  1.00  0.00         0 C  
ATOM   1881  O   MET A 120     143.486 148.698 132.225  1.00  0.00         0 O  
ATOM   1882  CB  MET A 120     142.623 145.499 132.667  1.00  0.00         0 C  
ATOM   1883  CG  MET A 120     141.223 146.131 132.595  1.00  0.00           C  
ATOM   1884  SD  MET A 120     139.927 145.162 133.424  1.00  0.00           S  
ATOM   1885  CE  MET A 120     140.284 145.550 135.161  1.00  0.00           C  
ATOM   1886  H   MET A 120     144.934 144.663 132.813  1.00  0.00         0 H  
ATOM   1887  HA  MET A 120     143.693 146.507 131.090  1.00  0.00           H  
ATOM   1888  HB2 MET A 120     142.568 144.584 132.080  1.00  0.00           H  
ATOM   1889  HB3 MET A 120     142.805 145.188 133.688  1.00  0.00           H  
ATOM   1890  HG2 MET A 120     141.202 147.133 133.020  1.00  0.00           H  
ATOM   1891  HG3 MET A 120     140.945 146.217 131.548  1.00  0.00           H  
ATOM   1892  HE1 MET A 120     139.584 145.029 135.813  1.00  0.00           H  
ATOM   1893  HE2 MET A 120     141.293 145.244 135.434  1.00  0.00           H  
ATOM   1894  HE3 MET A 120     140.190 146.621 135.343  1.00  0.00           H  
ATOM   1895  N   LEU A 121     144.257 147.701 134.104  1.00  0.00         0 N  
ATOM   1896  CA  LEU A 121     144.343 148.917 134.884  1.00  0.00         0 C  
ATOM   1897  C   LEU A 121     145.451 149.823 134.387  1.00  0.00         0 C  
ATOM   1898  O   LEU A 121     145.281 151.035 134.340  1.00  0.00         0 O  
ATOM   1899  CB  LEU A 121     144.532 148.557 136.372  1.00  0.00         0 C  
ATOM   1900  CG  LEU A 121     143.307 147.848 137.000  1.00  0.00           C  
ATOM   1901  CD1 LEU A 121     143.669 147.241 138.361  1.00  0.00           C  
ATOM   1902  CD2 LEU A 121     142.078 148.765 137.128  1.00  0.00           C  
ATOM   1903  H   LEU A 121     144.527 146.827 134.543  1.00  0.00         0 H  
ATOM   1904  HA  LEU A 121     143.414 149.477 134.767  1.00  0.00           H  
ATOM   1905  HB2 LEU A 121     145.414 147.922 136.475  1.00  0.00           H  
ATOM   1906  HB3 LEU A 121     144.751 149.459 136.946  1.00  0.00           H  
ATOM   1907  HG  LEU A 121     143.005 147.027 136.356  1.00  0.00           H  
ATOM   1908 HD11 LEU A 121     142.820 146.703 138.782  1.00  0.00           H  
ATOM   1909 HD12 LEU A 121     144.493 146.532 138.272  1.00  0.00           H  
ATOM   1910 HD13 LEU A 121     143.964 148.009 139.077  1.00  0.00           H  
ATOM   1911 HD21 LEU A 121     141.251 148.243 137.611  1.00  0.00           H  
ATOM   1912 HD22 LEU A 121     142.300 149.651 137.723  1.00  0.00           H  
ATOM   1913 HD23 LEU A 121     141.713 149.096 136.157  1.00  0.00           H  
ATOM   1914  N   PHE A 122     146.532 149.215 133.908  1.00  0.00         0 N  
ATOM   1915  CA  PHE A 122     147.617 149.907 133.256  1.00  0.00         0 C  
ATOM   1916  C   PHE A 122     147.227 150.555 131.935  1.00  0.00         0 C  
ATOM   1917  O   PHE A 122     147.510 151.723 131.668  1.00  0.00         0 O  
ATOM   1918  CB  PHE A 122     148.760 148.893 133.057  1.00  0.00         0 C  
ATOM   1919  CG  PHE A 122     150.003 149.433 132.381  1.00  0.00           C  
ATOM   1920  CD1 PHE A 122     150.939 150.174 133.128  1.00  0.00           C  
ATOM   1921  CD2 PHE A 122     150.226 149.198 131.008  1.00  0.00           C  
ATOM   1922  CE1 PHE A 122     152.093 150.685 132.504  1.00  0.00           C  
ATOM   1923  CE2 PHE A 122     151.380 149.709 130.385  1.00  0.00           C  
ATOM   1924  CZ  PHE A 122     152.313 150.453 131.133  1.00  0.00           C  
ATOM   1925  H   PHE A 122     146.594 148.208 134.021  1.00  0.00         0 H  
ATOM   1926  HA  PHE A 122     147.968 150.696 133.924  1.00  0.00           H  
ATOM   1927  HB2 PHE A 122     149.063 148.510 134.030  1.00  0.00           H  
ATOM   1928  HB3 PHE A 122     148.411 148.026 132.498  1.00  0.00           H  
ATOM   1929  HD1 PHE A 122     150.775 150.344 134.182  1.00  0.00           H  
ATOM   1930  HD2 PHE A 122     149.516 148.627 130.427  1.00  0.00           H  
ATOM   1931  HE1 PHE A 122     152.812 151.254 133.074  1.00  0.00           H  
ATOM   1932  HE2 PHE A 122     151.554 149.527 129.334  1.00  0.00           H  
ATOM   1933  HZ  PHE A 122     153.201 150.842 130.656  1.00  0.00           H  
ATOM   1934  N   TYR A 123     146.514 149.791 131.122  1.00  0.00         0 N  
ATOM   1935  CA  TYR A 123     146.045 150.199 129.823  1.00  0.00         0 C  
ATOM   1936  C   TYR A 123     145.076 151.358 129.902  1.00  0.00         0 C  
ATOM   1937  O   TYR A 123     145.258 152.374 129.246  1.00  0.00         0 O  
ATOM   1938  CB  TYR A 123     145.390 148.945 129.213  1.00  0.00           C  
ATOM   1939  CG  TYR A 123     144.992 148.960 127.756  1.00  0.00           C  
ATOM   1940  CD1 TYR A 123     143.794 149.584 127.351  1.00  0.00           C  
ATOM   1941  CD2 TYR A 123     145.882 148.440 126.793  1.00  0.00           C  
ATOM   1942  CE1 TYR A 123     143.509 149.722 125.981  1.00  0.00           C  
ATOM   1943  CE2 TYR A 123     145.600 148.586 125.426  1.00  0.00           C  
ATOM   1944  CZ  TYR A 123     144.420 149.234 125.024  1.00  0.00           C  
ATOM   1945  OH  TYR A 123     144.173 149.385 123.701  1.00  0.00           O  
ATOM   1946  H   TYR A 123     146.355 148.823 131.390  1.00  0.00         0 H  
ATOM   1947  HB2 TYR A 123     146.080 148.107 129.317  1.00  0.00           H  
ATOM   1948  HB3 TYR A 123     144.509 148.670 129.792  1.00  0.00           H  
ATOM   1949  HD1 TYR A 123     143.110 149.995 128.080  1.00  0.00           H  
ATOM   1950  HD2 TYR A 123     146.805 147.967 127.090  1.00  0.00           H  
ATOM   1951  HE1 TYR A 123     142.609 150.233 125.670  1.00  0.00           H  
ATOM   1952  HE2 TYR A 123     146.296 148.222 124.685  1.00  0.00           H  
ATOM   1953  HH  TYR A 123     143.282 149.699 123.550  1.00  0.00           H  
ATOM   1954  HA  TYR A 123     146.909 150.456 129.220  1.00  0.00           H  
ATOM   1955  N   ARG A 124     144.111 151.277 130.809  1.00  0.00         0 N  
ATOM   1956  CA  ARG A 124     143.175 152.363 131.015  1.00  0.00         0 C  
ATOM   1957  C   ARG A 124     143.770 153.602 131.672  1.00  0.00         0 C  
ATOM   1958  O   ARG A 124     143.141 154.658 131.689  1.00  0.00         0 O  
ATOM   1959  CB  ARG A 124     141.990 151.812 131.836  1.00  0.00         0 C  
ATOM   1960  CG  ARG A 124     141.276 150.655 131.105  1.00  0.00           C  
ATOM   1961  CD  ARG A 124     140.087 150.072 131.884  1.00  0.00           C  
ATOM   1962  NE  ARG A 124     139.433 148.973 131.154  1.00  0.00           N  
ATOM   1963  CZ  ARG A 124     138.552 149.087 130.149  1.00  0.00           C  
ATOM   1964  NH1 ARG A 124     138.169 150.285 129.698  1.00  0.00           N  
ATOM   1965  NH2 ARG A 124     138.043 147.983 129.595  1.00  0.00           N1+
ATOM   1966  H   ARG A 124     144.037 150.441 131.382  1.00  0.00         0 H  
ATOM   1967  HA  ARG A 124     142.793 152.692 130.045  1.00  0.00           H  
ATOM   1968  HB2 ARG A 124     142.337 151.485 132.819  1.00  0.00           H  
ATOM   1969  HB3 ARG A 124     141.263 152.604 132.021  1.00  0.00           H  
ATOM   1970  HG2 ARG A 124     140.943 151.002 130.126  1.00  0.00           H  
ATOM   1971  HG3 ARG A 124     141.986 149.852 130.910  1.00  0.00           H  
ATOM   1972  HD2 ARG A 124     140.390 149.743 132.878  1.00  0.00           H  
ATOM   1973  HD3 ARG A 124     139.330 150.843 132.027  1.00  0.00           H  
ATOM   1974  HE  ARG A 124     139.722 148.039 131.442  1.00  0.00           H  
ATOM   1975 HH11 ARG A 124     137.515 150.382 128.925  1.00  0.00           H  
ATOM   1976 HH12 ARG A 124     138.544 151.123 130.116  1.00  0.00           H  
ATOM   1977 HH21 ARG A 124     137.432 148.042 128.793  1.00  0.00           H  
ATOM   1978 HH22 ARG A 124     138.310 147.071 129.941  1.00  0.00           H  
ATOM   1979  N   LEU A 125     144.993 153.475 132.170  1.00  0.00         0 N  
ATOM   1980  CA  LEU A 125     145.679 154.522 132.864  1.00  0.00         0 C  
ATOM   1981  C   LEU A 125     146.638 155.309 132.006  1.00  0.00         0 C  
ATOM   1982  O   LEU A 125     146.764 156.518 132.191  1.00  0.00         0 O  
ATOM   1983  CB  LEU A 125     146.434 153.855 134.045  1.00  0.00         0 C  
ATOM   1984  CG  LEU A 125     147.271 154.751 134.979  1.00  0.00           C  
ATOM   1985  CD1 LEU A 125     147.315 154.162 136.400  1.00  0.00           C  
ATOM   1986  CD2 LEU A 125     148.703 155.001 134.475  1.00  0.00           C  
ATOM   1987  H   LEU A 125     145.446 152.572 132.117  1.00  0.00         0 H  
ATOM   1988  HA  LEU A 125     144.964 155.228 133.290  1.00  0.00           H  
ATOM   1989  HB2 LEU A 125     145.654 153.412 134.663  1.00  0.00           H  
ATOM   1990  HB3 LEU A 125     147.051 153.023 133.714  1.00  0.00           H  
ATOM   1991  HG  LEU A 125     146.763 155.705 135.036  1.00  0.00           H  
ATOM   1992 HD11 LEU A 125     147.882 154.805 137.073  1.00  0.00           H  
ATOM   1993 HD12 LEU A 125     146.315 154.061 136.823  1.00  0.00           H  
ATOM   1994 HD13 LEU A 125     147.778 153.175 136.413  1.00  0.00           H  
ATOM   1995 HD21 LEU A 125     149.310 155.485 135.242  1.00  0.00           H  
ATOM   1996 HD22 LEU A 125     149.191 154.069 134.199  1.00  0.00           H  
ATOM   1997 HD23 LEU A 125     148.735 155.654 133.605  1.00  0.00           H  
ATOM   1998  N   VAL A 126     147.322 154.625 131.101  1.00  0.00         0 N  
ATOM   1999  CA  VAL A 126     148.251 155.243 130.179  1.00  0.00         0 C  
ATOM   2000  C   VAL A 126     147.555 155.511 128.862  1.00  0.00         0 C  
ATOM   2001  O   VAL A 126     147.844 156.516 128.215  1.00  0.00         0 O  
ATOM   2002  CB  VAL A 126     149.420 154.228 129.970  1.00  0.00         0 C  
ATOM   2003  CG1 VAL A 126     150.514 154.729 129.005  1.00  0.00           C  
ATOM   2004  CG2 VAL A 126     150.082 153.813 131.301  1.00  0.00           C  
ATOM   2005  H   VAL A 126     147.263 153.612 131.121  1.00  0.00         0 H  
ATOM   2006  HA  VAL A 126     148.649 156.182 130.571  1.00  0.00           H  
ATOM   2007  HB3 VAL A 126     149.013 153.316 129.533  1.00  0.00           H  
ATOM   2008 HG11 VAL A 126     151.329 154.009 128.926  1.00  0.00           H  
ATOM   2009 HG12 VAL A 126     150.134 154.878 127.994  1.00  0.00           H  
ATOM   2010 HG13 VAL A 126     150.939 155.674 129.344  1.00  0.00           H  
ATOM   2011 HG21 VAL A 126     150.900 153.113 131.132  1.00  0.00           H  
ATOM   2012 HG22 VAL A 126     150.488 154.676 131.829  1.00  0.00           H  
ATOM   2013 HG23 VAL A 126     149.385 153.313 131.971  1.00  0.00           H  
ATOM   2014  N   PHE A 127     146.622 154.631 128.483  1.00  0.00         0 N  
ATOM   2015  CA  PHE A 127     145.960 154.733 127.206  1.00  0.00         0 C  
ATOM   2016  C   PHE A 127     144.482 155.019 127.455  1.00  0.00         0 C  
ATOM   2017  O   PHE A 127     144.086 155.211 128.606  1.00  0.00         0 O  
ATOM   2018  CB  PHE A 127     146.161 153.447 126.394  1.00  0.00         0 C  
ATOM   2019  CG  PHE A 127     145.719 153.513 124.948  1.00  0.00           C  
ATOM   2020  CD1 PHE A 127     146.443 154.295 124.030  1.00  0.00           C  
ATOM   2021  CD2 PHE A 127     144.589 152.795 124.522  1.00  0.00           C  
ATOM   2022  CE1 PHE A 127     146.039 154.354 122.685  1.00  0.00           C  
ATOM   2023  CE2 PHE A 127     144.184 152.854 123.177  1.00  0.00           C  
ATOM   2024  CZ  PHE A 127     144.910 153.634 122.258  1.00  0.00           C  
ATOM   2025  H   PHE A 127     146.399 153.826 129.058  1.00  0.00         0 H  
ATOM   2026  HA  PHE A 127     146.436 155.512 126.611  1.00  0.00           H  
ATOM   2027  HB2 PHE A 127     145.595 152.635 126.851  1.00  0.00           H  
ATOM   2028  HB3 PHE A 127     147.220 153.187 126.379  1.00  0.00           H  
ATOM   2029  HD1 PHE A 127     147.309 154.850 124.359  1.00  0.00           H  
ATOM   2030  HD2 PHE A 127     144.031 152.198 125.228  1.00  0.00           H  
ATOM   2031  HE1 PHE A 127     146.596 154.952 121.980  1.00  0.00           H  
ATOM   2032  HE2 PHE A 127     143.317 152.301 122.849  1.00  0.00           H  
ATOM   2033  HZ  PHE A 127     144.599 153.680 121.225  1.00  0.00           H  
ATOM   2034  N   ILE A 128     143.716 155.038 126.368  1.00  0.00         0 N  
ATOM   2035  CA  ILE A 128     142.277 155.296 126.418  1.00  0.00         0 C  
ATOM   2036  C   ILE A 128     141.561 154.001 126.836  1.00  0.00         0 C  
ATOM   2037  O   ILE A 128     141.919 152.905 126.405  1.00  0.00         0 O  
ATOM   2038  CB  ILE A 128     141.755 155.908 125.087  1.00  0.00         0 C  
ATOM   2039  CG1 ILE A 128     142.617 157.109 124.647  1.00  0.00           C  
ATOM   2040  CG2 ILE A 128     140.270 156.295 125.201  1.00  0.00           C  
ATOM   2041  CD1 ILE A 128     142.392 157.689 123.242  1.00  0.00           C  
ATOM   2042  H   ILE A 128     144.123 154.869 125.460  1.00  0.00         0 H  
ATOM   2043  HA  ILE A 128     142.084 156.160 127.053  1.00  0.00           H  
ATOM   2044  HB3 ILE A 128     141.709 155.131 124.323  1.00  0.00           H  
ATOM   2045 HG12 ILE A 128     142.449 157.945 125.326  1.00  0.00           H  
ATOM   2046 HG13 ILE A 128     143.670 156.829 124.671  1.00  0.00           H  
ATOM   2047 HG21 ILE A 128     139.931 156.720 124.256  1.00  0.00           H  
ATOM   2048 HG22 ILE A 128     139.679 155.408 125.432  1.00  0.00           H  
ATOM   2049 HG23 ILE A 128     140.145 157.031 125.995  1.00  0.00           H  
ATOM   2050 HD11 ILE A 128     143.071 158.526 123.080  1.00  0.00           H  
ATOM   2051 HD12 ILE A 128     142.583 156.917 122.495  1.00  0.00           H  
ATOM   2052 HD13 ILE A 128     141.362 158.034 123.151  1.00  0.00           H  
ATOM   2053  N   LEU A 129     140.546 154.159 127.682  1.00  0.00         0 N  
ATOM   2054  CA  LEU A 129     139.742 153.066 128.197  1.00  0.00         0 C  
ATOM   2055  C   LEU A 129     139.406 152.156 127.019  1.00  0.00         0 C  
ATOM   2056  O   LEU A 129     138.858 152.626 126.021  1.00  0.00         0 O  
ATOM   2057  CB  LEU A 129     138.502 153.568 128.985  1.00  0.00         0 C  
ATOM   2058  CG  LEU A 129     138.561 153.835 130.509  1.00  0.00           C  
ATOM   2059  CD1 LEU A 129     139.595 154.899 130.870  1.00  0.00           C  
ATOM   2060  CD2 LEU A 129     137.183 154.224 131.045  1.00  0.00           C  
ATOM   2061  H   LEU A 129     140.296 155.083 128.004  1.00  0.00         0 H  
ATOM   2062  HA  LEU A 129     140.265 152.590 129.026  1.00  0.00           H  
ATOM   2063  HB2 LEU A 129     137.694 152.842 128.892  1.00  0.00           H  
ATOM   2064  HB3 LEU A 129     138.177 154.527 128.579  1.00  0.00           H  
ATOM   2065  HG  LEU A 129     138.758 152.900 131.034  1.00  0.00           H  
ATOM   2066 HD11 LEU A 129     139.599 155.051 131.949  1.00  0.00           H  
ATOM   2067 HD12 LEU A 129     140.582 154.572 130.545  1.00  0.00           H  
ATOM   2068 HD13 LEU A 129     139.342 155.835 130.373  1.00  0.00           H  
ATOM   2069 HD21 LEU A 129     137.248 154.407 132.117  1.00  0.00           H  
ATOM   2070 HD22 LEU A 129     136.840 155.129 130.543  1.00  0.00           H  
ATOM   2071 HD23 LEU A 129     136.478 153.415 130.856  1.00  0.00           H  
ATOM   2072  N   HIS A 130     139.746 150.879 127.171  1.00  0.00         0 N  
ATOM   2073  CA  HIS A 130     139.409 149.696 126.193  1.00  0.00         0 C  
ATOM   2074  C   HIS A 130     137.794 149.324 126.133  1.00  0.00         0 C  
ATOM   2075  O   HIS A 130     137.232 148.377 126.687  1.00  0.00         0 O  
ATOM   2076  CB  HIS A 130     140.180 148.446 126.656  1.00  0.00           C  
ATOM   2077  CG  HIS A 130     140.580 147.462 125.581  1.00  0.00           C  
ATOM   2078  ND1 HIS A 130     139.867 147.288 124.465  1.00  0.00           N  
ATOM   2079  CD2 HIS A 130     141.649 146.603 125.492  1.00  0.00           C  
ATOM   2080  CE1 HIS A 130     140.467 146.354 123.709  1.00  0.00           C  
ATOM   2081  NE2 HIS A 130     141.571 145.896 124.298  1.00  0.00           N  
ATOM   2082  H   HIS A 130     140.193 150.574 128.024  1.00  0.00         0 H  
ATOM   2083  HB2 HIS A 130     141.108 148.750 127.141  1.00  0.00           H  
ATOM   2084  HB3 HIS A 130     139.569 147.883 127.362  1.00  0.00           H  
ATOM   2085  HD2 HIS A 130     142.379 146.565 126.287  1.00  0.00           H  
ATOM   2086  HE1 HIS A 130     140.039 146.072 122.759  1.00  0.00           H  
ATOM   2087  HE2 HIS A 130     142.278 145.213 124.069  1.00  0.00           H  
ATOM   2088  HA  HIS A 130     139.736 149.975 125.191  1.00  0.00           H  
ATOM   2089  N   GLU A 131     137.146 150.236 125.414  1.00  0.00         0 N  
ATOM   2090  CA  GLU A 131     135.712 150.218 125.202  1.00  0.00         0 C  
ATOM   2091  C   GLU A 131     135.405 150.116 123.701  1.00  0.00         0 C  
ATOM   2092  O   GLU A 131     134.264 149.902 123.293  1.00  0.00         0 O  
ATOM   2093  CB  GLU A 131     135.053 151.449 125.846  1.00  0.00         0 C  
ATOM   2094  CG  GLU A 131     135.229 151.612 127.364  1.00  0.00           C  
ATOM   2095  CD  GLU A 131     134.384 152.693 128.030  1.00  0.00           C  
ATOM   2096  OE1 GLU A 131     133.139 152.597 127.944  1.00  0.00           O1-
ATOM   2097  OE2 GLU A 131     135.003 153.602 128.621  1.00  0.00           O  
ATOM   2098  H   GLU A 131     137.655 150.993 124.981  1.00  0.00         0 H  
ATOM   2099  HA  GLU A 131     135.269 149.405 125.778  1.00  0.00           H  
ATOM   2100  HB2 GLU A 131     135.464 152.355 125.402  1.00  0.00           H  
ATOM   2101  HB3 GLU A 131     133.977 151.416 125.676  1.00  0.00           H  
ATOM   2102  HG2 GLU A 131     136.266 151.864 127.585  1.00  0.00           H  
ATOM   2103  HG3 GLU A 131     134.969 150.678 127.863  1.00  0.00           H  
ATOM   2104  N   THR A 132     136.450 150.274 122.893  1.00  0.00         0 N  
ATOM   2105  CA  THR A 132     136.374 150.215 121.443  1.00  0.00         0 C  
ATOM   2106  C   THR A 132     135.733 148.874 121.071  1.00  0.00         0 C  
ATOM   2107  O   THR A 132     134.633 148.855 120.512  1.00  0.00         0 O  
ATOM   2108  CB  THR A 132     137.759 150.437 120.795  1.00  0.00         0 C  
ATOM   2109  OG1 THR A 132     138.711 149.570 121.421  1.00  0.00           O  
ATOM   2110  CG2 THR A 132     138.259 151.883 120.906  1.00  0.00           C  
ATOM   2111  H   THR A 132     137.366 150.448 123.280  1.00  0.00         0 H  
ATOM   2112  HA  THR A 132     135.841 151.090 121.071  1.00  0.00           H  
ATOM   2113  HB3 THR A 132     137.697 150.236 119.726  1.00  0.00           H  
ATOM   2114  HG1 THR A 132     138.741 148.734 120.950  1.00  0.00           H  
ATOM   2115 HG21 THR A 132     139.237 151.967 120.431  1.00  0.00           H  
ATOM   2116 HG22 THR A 132     137.555 152.550 120.409  1.00  0.00           H  
ATOM   2117 HG23 THR A 132     138.342 152.159 121.957  1.00  0.00           H  
ATOM   2118  N   SER A 133     136.437 147.792 121.390  1.00  0.00         0 N  
ATOM   2119  CA  SER A 133     136.013 146.428 121.127  1.00  0.00         0 C  
ATOM   2120  C   SER A 133     136.136 145.578 122.386  1.00  0.00         0 C  
ATOM   2121  O   SER A 133     137.177 144.966 122.642  1.00  0.00         0 O  
ATOM   2122  CB  SER A 133     136.878 145.917 119.967  1.00  0.00         0 C  
ATOM   2123  OG  SER A 133     138.261 146.170 120.242  1.00  0.00           O  
ATOM   2124  H   SER A 133     137.332 147.888 121.847  1.00  0.00         0 H  
ATOM   2125  HA  SER A 133     134.993 146.432 120.743  1.00  0.00           H  
ATOM   2126  HB2 SER A 133     136.726 144.845 119.845  1.00  0.00           H  
ATOM   2127  HB3 SER A 133     136.594 146.431 119.049  1.00  0.00           H  
ATOM   2128  HG  SER A 133     138.515 145.718 121.050  1.00  0.00           H  
ATOM   2129  N   ARG A 134     135.054 145.551 123.166  1.00  0.00         0 N  
ATOM   2130  CA  ARG A 134     135.019 144.796 124.397  1.00  0.00         0 C  
ATOM   2131  C   ARG A 134     134.865 143.311 124.165  1.00  0.00         0 C  
ATOM   2132  O   ARG A 134     135.407 142.516 124.920  1.00  0.00         0 O  
ATOM   2133  CB  ARG A 134     133.887 145.318 125.324  1.00  0.00         0 C  
ATOM   2134  CG  ARG A 134     132.442 144.849 125.031  1.00  0.00           C  
ATOM   2135  CD  ARG A 134     131.448 145.225 126.143  1.00  0.00           C  
ATOM   2136  NE  ARG A 134     130.061 145.207 125.663  1.00  0.00           N  
ATOM   2137  CZ  ARG A 134     128.968 145.303 126.436  1.00  0.00           C  
ATOM   2138  NH1 ARG A 134     129.063 145.428 127.766  1.00  0.00           N  
ATOM   2139  NH2 ARG A 134     127.761 145.264 125.864  1.00  0.00           N1+
ATOM   2140  H   ARG A 134     134.261 146.121 122.918  1.00  0.00         0 H  
ATOM   2141  HA  ARG A 134     135.958 144.964 124.926  1.00  0.00           H  
ATOM   2142  HB2 ARG A 134     134.135 145.008 126.341  1.00  0.00           H  
ATOM   2143  HB3 ARG A 134     133.914 146.408 125.344  1.00  0.00           H  
ATOM   2144  HG2 ARG A 134     132.109 145.244 124.070  1.00  0.00           H  
ATOM   2145  HG3 ARG A 134     132.406 143.764 124.934  1.00  0.00           H  
ATOM   2146  HD2 ARG A 134     131.518 144.491 126.947  1.00  0.00           H  
ATOM   2147  HD3 ARG A 134     131.688 146.193 126.584  1.00  0.00           H  
ATOM   2148  HE  ARG A 134     129.942 145.050 124.672  1.00  0.00           H  
ATOM   2149 HH11 ARG A 134     128.238 145.496 128.343  1.00  0.00           H  
ATOM   2150 HH12 ARG A 134     129.966 145.426 128.216  1.00  0.00           H  
ATOM   2151 HH21 ARG A 134     126.920 145.321 126.420  1.00  0.00           H  
ATOM   2152 HH22 ARG A 134     127.662 145.152 124.866  1.00  0.00           H  
ATOM   2153  N   SER A 135     134.169 142.945 123.096  1.00  0.00         0 N  
ATOM   2154  CA  SER A 135     134.063 141.578 122.644  1.00  0.00         0 C  
ATOM   2155  C   SER A 135     135.402 141.030 122.174  1.00  0.00         0 C  
ATOM   2156  O   SER A 135     135.743 139.882 122.456  1.00  0.00         0 O  
ATOM   2157  CB  SER A 135     132.971 141.508 121.545  1.00  0.00         0 C  
ATOM   2158  OG  SER A 135     133.104 142.475 120.504  1.00  0.00           O  
ATOM   2159  H   SER A 135     133.790 143.650 122.480  1.00  0.00         0 H  
ATOM   2160  HA  SER A 135     133.736 140.960 123.484  1.00  0.00           H  
ATOM   2161  HB2 SER A 135     132.959 140.513 121.097  1.00  0.00           H  
ATOM   2162  HB3 SER A 135     131.990 141.640 122.005  1.00  0.00           H  
ATOM   2163  HG  SER A 135     132.397 142.358 119.882  1.00  0.00           H  
ATOM   2164  N   THR A 136     136.196 141.899 121.545  1.00  0.00         0 N  
ATOM   2165  CA  THR A 136     137.543 141.563 121.147  1.00  0.00         0 C  
ATOM   2166  C   THR A 136     138.457 141.412 122.355  1.00  0.00         0 C  
ATOM   2167  O   THR A 136     139.209 140.444 122.466  1.00  0.00         0 O  
ATOM   2168  CB  THR A 136     138.127 142.617 120.161  1.00  0.00         0 C  
ATOM   2169  OG1 THR A 136     137.339 142.703 118.982  1.00  0.00           O  
ATOM   2170  CG2 THR A 136     139.546 142.289 119.662  1.00  0.00           C  
ATOM   2171  H   THR A 136     135.852 142.827 121.331  1.00  0.00         0 H  
ATOM   2172  HA  THR A 136     137.520 140.599 120.633  1.00  0.00           H  
ATOM   2173  HB3 THR A 136     138.157 143.596 120.638  1.00  0.00           H  
ATOM   2174  HG1 THR A 136     137.338 141.839 118.565  1.00  0.00           H  
ATOM   2175 HG21 THR A 136     139.883 143.021 118.928  1.00  0.00           H  
ATOM   2176 HG22 THR A 136     140.278 142.293 120.470  1.00  0.00           H  
ATOM   2177 HG23 THR A 136     139.582 141.307 119.188  1.00  0.00           H  
ATOM   2178  N   GLN A 137     138.344 142.359 123.281  1.00  0.00         0 N  
ATOM   2179  CA  GLN A 137     139.110 142.374 124.499  1.00  0.00         0 C  
ATOM   2180  C   GLN A 137     138.781 141.212 125.426  1.00  0.00         0 C  
ATOM   2181  O   GLN A 137     139.666 140.660 126.076  1.00  0.00         0 O  
ATOM   2182  CB  GLN A 137     138.841 143.725 125.202  1.00  0.00         0 C  
ATOM   2183  CG  GLN A 137     139.577 143.949 126.546  1.00  0.00           C  
ATOM   2184  CD  GLN A 137     139.108 145.181 127.330  1.00  0.00           C  
ATOM   2185  OE1 GLN A 137     139.727 145.571 128.313  1.00  0.00           O  
ATOM   2186  NE2 GLN A 137     138.020 145.829 126.928  1.00  0.00           N  
ATOM   2187  H   GLN A 137     137.721 143.140 123.102  1.00  0.00         0 H  
ATOM   2188  HA  GLN A 137     140.166 142.352 124.241  1.00  0.00           H  
ATOM   2189  HB2 GLN A 137     139.127 144.518 124.510  1.00  0.00           H  
ATOM   2190  HB3 GLN A 137     137.772 143.826 125.381  1.00  0.00           H  
ATOM   2191  HG2 GLN A 137     139.469 143.079 127.195  1.00  0.00           H  
ATOM   2192  HG3 GLN A 137     140.646 144.063 126.363  1.00  0.00           H  
ATOM   2193 HE21 GLN A 137     137.776 146.688 127.391  1.00  0.00           H  
ATOM   2194 HE22 GLN A 137     137.537 145.517 126.101  1.00  0.00           H  
ATOM   2195  N   LYS A 138     137.513 140.807 125.438  1.00  0.00         0 N  
ATOM   2196  CA  LYS A 138     137.079 139.646 126.168  1.00  0.00         0 C  
ATOM   2197  C   LYS A 138     137.611 138.358 125.561  1.00  0.00         0 C  
ATOM   2198  O   LYS A 138     138.030 137.455 126.280  1.00  0.00         0 O  
ATOM   2199  CB  LYS A 138     135.537 139.621 126.279  1.00  0.00         0 C  
ATOM   2200  CG  LYS A 138     135.017 138.737 127.431  1.00  0.00           C  
ATOM   2201  CD  LYS A 138     133.499 138.864 127.642  1.00  0.00           C  
ATOM   2202  CE  LYS A 138     133.020 138.193 128.941  1.00  0.00           C  
ATOM   2203  NZ  LYS A 138     131.558 138.275 129.082  1.00  0.00           N1+
ATOM   2204  H   LYS A 138     136.808 141.372 124.973  1.00  0.00         0 H  
ATOM   2205  HA  LYS A 138     137.485 139.731 127.177  1.00  0.00           H  
ATOM   2206  HB2 LYS A 138     135.190 140.631 126.490  1.00  0.00           H  
ATOM   2207  HB3 LYS A 138     135.083 139.331 125.330  1.00  0.00           H  
ATOM   2208  HG2 LYS A 138     135.278 137.693 127.253  1.00  0.00           H  
ATOM   2209  HG3 LYS A 138     135.527 139.026 128.351  1.00  0.00           H  
ATOM   2210  HD2 LYS A 138     133.220 139.919 127.674  1.00  0.00           H  
ATOM   2211  HD3 LYS A 138     132.976 138.435 126.786  1.00  0.00           H  
ATOM   2212  HE2 LYS A 138     133.315 137.144 128.969  1.00  0.00           H  
ATOM   2213  HE3 LYS A 138     133.472 138.678 129.804  1.00  0.00           H  
ATOM   2214  HZ1 LYS A 138     131.257 139.237 129.006  1.00  0.00           H  
ATOM   2215  HZ2 LYS A 138     131.118 137.737 128.350  1.00  0.00           H  
ATOM   2216  HZ3 LYS A 138     131.284 137.905 129.981  1.00  0.00           H  
ATOM   2217  N   ALA A 139     137.672 138.296 124.235  1.00  0.00         0 N  
ATOM   2218  CA  ALA A 139     138.218 137.149 123.557  1.00  0.00         0 C  
ATOM   2219  C   ALA A 139     139.702 136.968 123.786  1.00  0.00         0 C  
ATOM   2220  O   ALA A 139     140.136 135.894 124.203  1.00  0.00         0 O  
ATOM   2221  CB  ALA A 139     137.939 137.274 122.050  1.00  0.00         0 C  
ATOM   2222  H   ALA A 139     137.304 139.063 123.685  1.00  0.00         0 H  
ATOM   2223  HA  ALA A 139     137.708 136.254 123.921  1.00  0.00           H  
ATOM   2224  HB1 ALA A 139     138.310 136.400 121.512  1.00  0.00           H  
ATOM   2225  HB2 ALA A 139     136.868 137.341 121.855  1.00  0.00           H  
ATOM   2226  HB3 ALA A 139     138.409 138.151 121.608  1.00  0.00           H  
ATOM   2227  N   ILE A 140     140.467 138.038 123.572  1.00  0.00         0 N  
ATOM   2228  CA  ILE A 140     141.894 138.020 123.824  1.00  0.00         0 C  
ATOM   2229  C   ILE A 140     142.258 137.785 125.284  1.00  0.00         0 C  
ATOM   2230  O   ILE A 140     143.267 137.137 125.570  1.00  0.00         0 O  
ATOM   2231  CB  ILE A 140     142.612 139.242 123.187  1.00  0.00         0 C  
ATOM   2232  CG1 ILE A 140     142.305 140.592 123.858  1.00  0.00           C  
ATOM   2233  CG2 ILE A 140     142.329 139.312 121.672  1.00  0.00           C  
ATOM   2234  CD1 ILE A 140     142.815 141.819 123.091  1.00  0.00           C  
ATOM   2235  H   ILE A 140     140.037 138.897 123.238  1.00  0.00         0 H  
ATOM   2236  HA  ILE A 140     142.283 137.146 123.299  1.00  0.00           H  
ATOM   2237  HB3 ILE A 140     143.686 139.065 123.278  1.00  0.00           H  
ATOM   2238 HG12 ILE A 140     141.231 140.709 124.008  1.00  0.00           H  
ATOM   2239 HG13 ILE A 140     142.741 140.578 124.846  1.00  0.00           H  
ATOM   2240 HG21 ILE A 140     142.920 140.097 121.199  1.00  0.00           H  
ATOM   2241 HG22 ILE A 140     142.586 138.374 121.179  1.00  0.00           H  
ATOM   2242 HG23 ILE A 140     141.281 139.520 121.459  1.00  0.00           H  
ATOM   2243 HD11 ILE A 140     142.589 142.735 123.638  1.00  0.00           H  
ATOM   2244 HD12 ILE A 140     143.894 141.788 122.939  1.00  0.00           H  
ATOM   2245 HD13 ILE A 140     142.340 141.895 122.112  1.00  0.00           H  
ATOM   2246  N   ALA A 141     141.371 138.213 126.187  1.00  0.00         0 N  
ATOM   2247  CA  ALA A 141     141.424 137.851 127.579  1.00  0.00         0 C  
ATOM   2248  C   ALA A 141     141.363 136.366 127.823  1.00  0.00         0 C  
ATOM   2249  O   ALA A 141     142.297 135.815 128.387  1.00  0.00         0 O  
ATOM   2250  CB  ALA A 141     140.371 138.604 128.408  1.00  0.00         0 C  
ATOM   2251  H   ALA A 141     140.594 138.786 125.878  1.00  0.00         0 H  
ATOM   2252  HA  ALA A 141     142.398 138.185 127.946  1.00  0.00           H  
ATOM   2253  HB1 ALA A 141     140.447 138.334 129.461  1.00  0.00           H  
ATOM   2254  HB2 ALA A 141     140.523 139.681 128.345  1.00  0.00           H  
ATOM   2255  HB3 ALA A 141     139.353 138.388 128.101  1.00  0.00           H  
ATOM   2256  N   PHE A 142     140.312 135.708 127.347  1.00  0.00         0 N  
ATOM   2257  CA  PHE A 142     140.157 134.282 127.560  1.00  0.00         0 C  
ATOM   2258  C   PHE A 142     141.172 133.410 126.836  1.00  0.00         0 C  
ATOM   2259  O   PHE A 142     141.608 132.380 127.358  1.00  0.00         0 O  
ATOM   2260  CB  PHE A 142     138.714 133.854 127.221  1.00  0.00           C  
ATOM   2261  CG  PHE A 142     137.722 134.022 128.369  1.00  0.00           C  
ATOM   2262  CD1 PHE A 142     137.473 132.951 129.253  1.00  0.00           C  
ATOM   2263  CD2 PHE A 142     137.023 135.233 128.552  1.00  0.00           C  
ATOM   2264  CE1 PHE A 142     136.519 133.084 130.282  1.00  0.00           C  
ATOM   2265  CE2 PHE A 142     136.080 135.375 129.586  1.00  0.00           C  
ATOM   2266  CZ  PHE A 142     135.820 134.295 130.447  1.00  0.00           C  
ATOM   2267  H   PHE A 142     139.584 136.225 126.863  1.00  0.00         0 H  
ATOM   2268  HB2 PHE A 142     138.352 134.389 126.342  1.00  0.00           H  
ATOM   2269  HB3 PHE A 142     138.692 132.799 126.939  1.00  0.00           H  
ATOM   2270  HD1 PHE A 142     137.994 132.014 129.130  1.00  0.00           H  
ATOM   2271  HD2 PHE A 142     137.194 136.066 127.899  1.00  0.00           H  
ATOM   2272  HE1 PHE A 142     136.314 132.255 130.942  1.00  0.00           H  
ATOM   2273  HE2 PHE A 142     135.556 136.309 129.720  1.00  0.00           H  
ATOM   2274  HZ  PHE A 142     135.090 134.408 131.235  1.00  0.00           H  
ATOM   2275  HA  PHE A 142     140.311 134.082 128.624  1.00  0.00           H  
ATOM   2276  N   CYS A 143     141.593 133.859 125.659  1.00  0.00         0 N  
ATOM   2277  CA  CYS A 143     142.488 133.103 124.817  1.00  0.00         0 C  
ATOM   2278  C   CYS A 143     143.931 133.054 125.283  1.00  0.00         0 C  
ATOM   2279  O   CYS A 143     144.655 132.136 124.913  1.00  0.00         0 O  
ATOM   2280  CB  CYS A 143     142.470 133.717 123.401  1.00  0.00           C  
ATOM   2281  SG  CYS A 143     140.973 133.194 122.513  1.00  0.00           S  
ATOM   2282  H   CYS A 143     141.147 134.687 125.267  1.00  0.00         0 H  
ATOM   2283  HB2 CYS A 143     142.532 134.805 123.434  1.00  0.00           H  
ATOM   2284  HB3 CYS A 143     143.323 133.375 122.810  1.00  0.00           H  
ATOM   2285  HG  CYS A 143     141.229 133.889 121.398  1.00  0.00           H  
ATOM   2286  HA  CYS A 143     142.143 132.068 124.758  1.00  0.00           H  
ATOM   2287  N   LEU A 144     144.344 134.001 126.117  1.00  0.00         0 N  
ATOM   2288  CA  LEU A 144     145.580 133.872 126.866  1.00  0.00         0 C  
ATOM   2289  C   LEU A 144     145.296 133.480 128.296  1.00  0.00         0 C  
ATOM   2290  O   LEU A 144     146.117 132.819 128.921  1.00  0.00         0 O  
ATOM   2291  CB  LEU A 144     146.300 135.241 126.818  1.00  0.00           C  
ATOM   2292  CG  LEU A 144     147.819 135.182 127.117  1.00  0.00           C  
ATOM   2293  CD1 LEU A 144     148.611 136.062 126.137  1.00  0.00           C  
ATOM   2294  CD2 LEU A 144     148.149 135.570 128.566  1.00  0.00           C  
ATOM   2295  H   LEU A 144     143.730 134.781 126.318  1.00  0.00         0 H  
ATOM   2296  HB2 LEU A 144     146.172 135.638 125.810  1.00  0.00           H  
ATOM   2297  HB3 LEU A 144     145.805 135.971 127.462  1.00  0.00           H  
ATOM   2298  HG  LEU A 144     148.171 134.162 126.962  1.00  0.00           H  
ATOM   2299 HD11 LEU A 144     149.683 136.000 126.323  1.00  0.00           H  
ATOM   2300 HD12 LEU A 144     148.446 135.751 125.104  1.00  0.00           H  
ATOM   2301 HD13 LEU A 144     148.320 137.111 126.217  1.00  0.00           H  
ATOM   2302 HD21 LEU A 144     149.220 135.488 128.755  1.00  0.00           H  
ATOM   2303 HD22 LEU A 144     147.854 136.598 128.781  1.00  0.00           H  
ATOM   2304 HD23 LEU A 144     147.643 134.924 129.281  1.00  0.00           H  
ATOM   2305  HA  LEU A 144     146.238 133.119 126.429  1.00  0.00           H  
ATOM   2306  N   GLY A 145     144.107 133.842 128.764  1.00  0.00         0 N  
ATOM   2307  CA  GLY A 145     143.604 133.650 130.091  1.00  0.00         0 C  
ATOM   2308  C   GLY A 145     143.548 132.207 130.556  1.00  0.00         0 C  
ATOM   2309  O   GLY A 145     143.870 131.912 131.704  1.00  0.00         0 O  
ATOM   2310  H   GLY A 145     143.533 134.465 128.206  1.00  0.00         0 H  
ATOM   2311  HA3 GLY A 145     142.597 134.058 130.172  1.00  0.00           H  
ATOM   2312  HA2 GLY A 145     144.220 134.222 130.787  1.00  0.00           H  
ATOM   2313  N   TYR A 146     143.217 131.312 129.626  1.00  0.00         0 N  
ATOM   2314  CA  TYR A 146     143.373 129.881 129.804  1.00  0.00         0 C  
ATOM   2315  C   TYR A 146     144.226 129.228 128.736  1.00  0.00         0 C  
ATOM   2316  O   TYR A 146     144.705 128.110 128.931  1.00  0.00         0 O  
ATOM   2317  CB  TYR A 146     141.994 129.193 129.821  1.00  0.00           C  
ATOM   2318  CG  TYR A 146     141.091 129.531 130.992  1.00  0.00           C  
ATOM   2319  CD1 TYR A 146     141.396 129.066 132.288  1.00  0.00           C  
ATOM   2320  CD2 TYR A 146     139.912 130.271 130.776  1.00  0.00           C  
ATOM   2321  CE1 TYR A 146     140.534 129.355 133.365  1.00  0.00           C  
ATOM   2322  CE2 TYR A 146     139.039 130.536 131.846  1.00  0.00           C  
ATOM   2323  CZ  TYR A 146     139.355 130.088 133.141  1.00  0.00           C  
ATOM   2324  OH  TYR A 146     138.527 130.387 134.180  1.00  0.00           O  
ATOM   2325  H   TYR A 146     142.831 131.666 128.757  1.00  0.00         0 H  
ATOM   2326  HB2 TYR A 146     141.469 129.401 128.888  1.00  0.00           H  
ATOM   2327  HB3 TYR A 146     142.127 128.109 129.839  1.00  0.00           H  
ATOM   2328  HD1 TYR A 146     142.286 128.477 132.463  1.00  0.00           H  
ATOM   2329  HD2 TYR A 146     139.669 130.625 129.785  1.00  0.00           H  
ATOM   2330  HE1 TYR A 146     140.767 128.996 134.358  1.00  0.00           H  
ATOM   2331  HE2 TYR A 146     138.135 131.097 131.668  1.00  0.00           H  
ATOM   2332  HH  TYR A 146     137.630 130.495 133.902  1.00  0.00           H  
ATOM   2333  HA  TYR A 146     143.865 129.655 130.751  1.00  0.00           H  
ATOM   2334  N   GLY A 147     144.413 129.905 127.602  1.00  0.00         0 N  
ATOM   2335  CA  GLY A 147     145.026 129.287 126.448  1.00  0.00         0 C  
ATOM   2336  C   GLY A 147     146.502 128.984 126.629  1.00  0.00         0 C  
ATOM   2337  O   GLY A 147     146.950 127.856 126.424  1.00  0.00         0 O  
ATOM   2338  H   GLY A 147     144.009 130.823 127.502  1.00  0.00         0 H  
ATOM   2339  HA3 GLY A 147     144.894 129.885 125.555  1.00  0.00           H  
ATOM   2340  HA2 GLY A 147     144.510 128.349 126.235  1.00  0.00           H  
ATOM   2341  N   CYS A 148     147.238 129.988 127.098  1.00  0.00         0 N  
ATOM   2342  CA  CYS A 148     148.638 129.844 127.443  1.00  0.00         0 C  
ATOM   2343  C   CYS A 148     148.869 128.976 128.663  1.00  0.00         0 C  
ATOM   2344  O   CYS A 148     149.700 128.068 128.578  1.00  0.00         0 O  
ATOM   2345  CB  CYS A 148     149.271 131.252 127.574  1.00  0.00           C  
ATOM   2346  SG  CYS A 148     151.080 131.186 127.436  1.00  0.00           S  
ATOM   2347  H   CYS A 148     146.770 130.851 127.338  1.00  0.00         0 H  
ATOM   2348  HB2 CYS A 148     148.921 131.888 126.761  1.00  0.00           H  
ATOM   2349  HB3 CYS A 148     149.010 131.767 128.494  1.00  0.00           H  
ATOM   2350  HG  CYS A 148     151.277 132.505 127.544  1.00  0.00           H  
ATOM   2351  HA  CYS A 148     149.120 129.354 126.595  1.00  0.00           H  
ATOM   2352  N   PRO A 149     148.090 129.145 129.746  1.00  0.00         0 N  
ATOM   2353  CA  PRO A 149     147.964 128.130 130.752  1.00  0.00         0 C  
ATOM   2354  C   PRO A 149     147.921 126.661 130.374  1.00  0.00         0 C  
ATOM   2355  O   PRO A 149     148.711 125.862 130.885  1.00  0.00         0 O  
ATOM   2356  CB  PRO A 149     146.787 128.518 131.649  1.00  0.00         0 C  
ATOM   2357  CG  PRO A 149     146.790 130.021 131.568  1.00  0.00           C  
ATOM   2358  CD  PRO A 149     147.330 130.326 130.171  1.00  0.00           C  
ATOM   2359  HA  PRO A 149     148.868 128.244 131.356  1.00  0.00           H  
ATOM   2360  HB1 PRO A 149     145.844 128.138 131.262  1.00  0.00           H  
ATOM   2361  HB2 PRO A 149     146.895 128.150 132.672  1.00  0.00           H  
ATOM   2362  HG2 PRO A 149     145.817 130.459 131.757  1.00  0.00           H  
ATOM   2363  HG3 PRO A 149     147.466 130.408 132.325  1.00  0.00           H  
ATOM   2364  HD2 PRO A 149     146.498 130.494 129.500  1.00  0.00           H  
ATOM   2365  HD3 PRO A 149     147.935 131.229 130.217  1.00  0.00           H  
ATOM   2366  N   LEU A 150     147.014 126.310 129.465  1.00  0.00         0 N  
ATOM   2367  CA  LEU A 150     146.863 124.937 129.037  1.00  0.00         0 C  
ATOM   2368  C   LEU A 150     148.048 124.476 128.220  1.00  0.00         0 C  
ATOM   2369  O   LEU A 150     148.533 123.366 128.419  1.00  0.00         0 O  
ATOM   2370  CB  LEU A 150     145.551 124.809 128.237  1.00  0.00           C  
ATOM   2371  CG  LEU A 150     145.107 123.364 127.917  1.00  0.00           C  
ATOM   2372  CD1 LEU A 150     144.962 122.487 129.176  1.00  0.00           C  
ATOM   2373  CD2 LEU A 150     143.786 123.390 127.135  1.00  0.00           C  
ATOM   2374  H   LEU A 150     146.360 127.003 129.112  1.00  0.00         0 H  
ATOM   2375  HB2 LEU A 150     144.748 125.291 128.794  1.00  0.00           H  
ATOM   2376  HB3 LEU A 150     145.636 125.377 127.308  1.00  0.00           H  
ATOM   2377  HG  LEU A 150     145.856 122.900 127.273  1.00  0.00           H  
ATOM   2378 HD11 LEU A 150     144.536 121.514 128.930  1.00  0.00           H  
ATOM   2379 HD12 LEU A 150     145.922 122.292 129.654  1.00  0.00           H  
ATOM   2380 HD13 LEU A 150     144.310 122.953 129.916  1.00  0.00           H  
ATOM   2381 HD21 LEU A 150     143.472 122.385 126.852  1.00  0.00           H  
ATOM   2382 HD22 LEU A 150     142.984 123.833 127.727  1.00  0.00           H  
ATOM   2383 HD23 LEU A 150     143.880 123.973 126.218  1.00  0.00           H  
ATOM   2384  HA  LEU A 150     146.799 124.322 129.936  1.00  0.00           H  
ATOM   2385  N   ALA A 151     148.561 125.373 127.380  1.00  0.00         0 N  
ATOM   2386  CA  ALA A 151     149.735 125.146 126.576  1.00  0.00         0 C  
ATOM   2387  C   ALA A 151     150.973 124.759 127.361  1.00  0.00         0 C  
ATOM   2388  O   ALA A 151     151.646 123.787 127.033  1.00  0.00         0 O  
ATOM   2389  CB  ALA A 151     150.017 126.376 125.700  1.00  0.00         0 C  
ATOM   2390  H   ALA A 151     148.097 126.271 127.302  1.00  0.00         0 H  
ATOM   2391  HA  ALA A 151     149.500 124.328 125.895  1.00  0.00           H  
ATOM   2392  HB1 ALA A 151     150.822 126.169 124.995  1.00  0.00           H  
ATOM   2393  HB2 ALA A 151     149.140 126.656 125.116  1.00  0.00           H  
ATOM   2394  HB3 ALA A 151     150.321 127.243 126.285  1.00  0.00           H  
ATOM   2395  N   ILE A 152     151.214 125.489 128.444  1.00  0.00         0 N  
ATOM   2396  CA  ILE A 152     152.320 125.241 129.343  1.00  0.00         0 C  
ATOM   2397  C   ILE A 152     152.134 123.960 130.150  1.00  0.00         0 C  
ATOM   2398  O   ILE A 152     153.101 123.291 130.516  1.00  0.00         0 O  
ATOM   2399  CB  ILE A 152     152.478 126.498 130.264  1.00  0.00           C  
ATOM   2400  CG1 ILE A 152     152.862 127.746 129.424  1.00  0.00           C  
ATOM   2401  CG2 ILE A 152     153.508 126.314 131.405  1.00  0.00           C  
ATOM   2402  CD1 ILE A 152     152.657 129.090 130.140  1.00  0.00           C  
ATOM   2403  H   ILE A 152     150.610 126.284 128.631  1.00  0.00         0 H  
ATOM   2404  HB  ILE A 152     151.510 126.691 130.731  1.00  0.00           H  
ATOM   2405 HG12 ILE A 152     153.899 127.661 129.095  1.00  0.00           H  
ATOM   2406 HG13 ILE A 152     152.282 127.790 128.502  1.00  0.00           H  
ATOM   2407 HG21 ILE A 152     153.633 127.222 131.994  1.00  0.00           H  
ATOM   2408 HG22 ILE A 152     153.210 125.541 132.113  1.00  0.00           H  
ATOM   2409 HG23 ILE A 152     154.488 126.042 131.011  1.00  0.00           H  
ATOM   2410 HD11 ILE A 152     152.898 129.913 129.467  1.00  0.00           H  
ATOM   2411 HD12 ILE A 152     151.622 129.219 130.455  1.00  0.00           H  
ATOM   2412 HD13 ILE A 152     153.300 129.198 131.012  1.00  0.00           H  
ATOM   2413  HA  ILE A 152     153.232 125.151 128.757  1.00  0.00           H  
ATOM   2414  N   SER A 153     150.886 123.579 130.379  1.00  0.00         0 N  
ATOM   2415  CA  SER A 153     150.585 122.402 131.153  1.00  0.00         0 C  
ATOM   2416  C   SER A 153     150.744 121.142 130.330  1.00  0.00         0 C  
ATOM   2417  O   SER A 153     151.385 120.186 130.776  1.00  0.00         0 O  
ATOM   2418  CB  SER A 153     149.118 122.493 131.663  1.00  0.00           C  
ATOM   2419  OG  SER A 153     148.892 123.602 132.528  1.00  0.00           O  
ATOM   2420  H   SER A 153     150.126 124.153 130.040  1.00  0.00         0 H  
ATOM   2421  HB2 SER A 153     148.401 122.533 130.843  1.00  0.00           H  
ATOM   2422  HB3 SER A 153     148.876 121.594 132.232  1.00  0.00           H  
ATOM   2423  HG  SER A 153     148.973 124.410 132.024  1.00  0.00           H  
ATOM   2424  HA  SER A 153     151.243 122.339 132.024  1.00  0.00           H  
ATOM   2425  N   VAL A 154     150.210 121.160 129.106  1.00  0.00         0 N  
ATOM   2426  CA  VAL A 154     150.279 120.018 128.225  1.00  0.00         0 C  
ATOM   2427  C   VAL A 154     151.698 119.676 127.796  1.00  0.00         0 C  
ATOM   2428  O   VAL A 154     152.029 118.497 127.665  1.00  0.00         0 O  
ATOM   2429  CB  VAL A 154     149.320 120.156 127.013  1.00  0.00           C  
ATOM   2430  CG1 VAL A 154     147.845 120.214 127.457  1.00  0.00           C  
ATOM   2431  CG2 VAL A 154     149.662 121.299 126.045  1.00  0.00           C  
ATOM   2432  H   VAL A 154     149.702 121.985 128.789  1.00  0.00         0 H  
ATOM   2433  HB  VAL A 154     149.417 119.237 126.432  1.00  0.00           H  
ATOM   2434 HG11 VAL A 154     147.178 120.302 126.600  1.00  0.00           H  
ATOM   2435 HG12 VAL A 154     147.565 119.306 127.991  1.00  0.00           H  
ATOM   2436 HG13 VAL A 154     147.639 121.053 128.117  1.00  0.00           H  
ATOM   2437 HG21 VAL A 154     148.934 121.367 125.236  1.00  0.00           H  
ATOM   2438 HG22 VAL A 154     149.667 122.249 126.559  1.00  0.00           H  
ATOM   2439 HG23 VAL A 154     150.642 121.169 125.586  1.00  0.00           H  
ATOM   2440  HA  VAL A 154     149.932 119.155 128.799  1.00  0.00           H  
ATOM   2441  N   ILE A 155     152.554 120.695 127.666  1.00  0.00         0 N  
ATOM   2442  CA  ILE A 155     153.963 120.453 127.459  1.00  0.00         0 C  
ATOM   2443  C   ILE A 155     154.665 119.859 128.667  1.00  0.00         0 C  
ATOM   2444  O   ILE A 155     155.545 119.009 128.515  1.00  0.00         0 O  
ATOM   2445  CB  ILE A 155     154.710 121.696 126.901  1.00  0.00           C  
ATOM   2446  CG1 ILE A 155     154.762 122.884 127.877  1.00  0.00           C  
ATOM   2447  CG2 ILE A 155     154.151 122.080 125.514  1.00  0.00           C  
ATOM   2448  CD1 ILE A 155     155.473 124.141 127.358  1.00  0.00           C  
ATOM   2449  H   ILE A 155     152.217 121.649 127.732  1.00  0.00         0 H  
ATOM   2450  HB  ILE A 155     155.745 121.391 126.734  1.00  0.00           H  
ATOM   2451 HG12 ILE A 155     153.744 123.133 128.128  1.00  0.00           H  
ATOM   2452 HG13 ILE A 155     155.248 122.589 128.807  1.00  0.00           H  
ATOM   2453 HG21 ILE A 155     154.730 122.876 125.048  1.00  0.00           H  
ATOM   2454 HG22 ILE A 155     154.187 121.229 124.832  1.00  0.00           H  
ATOM   2455 HG23 ILE A 155     153.115 122.408 125.561  1.00  0.00           H  
ATOM   2456 HD11 ILE A 155     155.585 124.874 128.157  1.00  0.00           H  
ATOM   2457 HD12 ILE A 155     156.469 123.909 126.981  1.00  0.00           H  
ATOM   2458 HD13 ILE A 155     154.906 124.621 126.560  1.00  0.00           H  
ATOM   2459  HA  ILE A 155     154.046 119.689 126.682  1.00  0.00           H  
ATOM   2460  N   THR A 156     154.238 120.262 129.863  1.00  0.00         0 N  
ATOM   2461  CA  THR A 156     154.870 119.808 131.080  1.00  0.00         0 C  
ATOM   2462  C   THR A 156     154.643 118.318 131.310  1.00  0.00         0 C  
ATOM   2463  O   THR A 156     155.588 117.545 131.520  1.00  0.00         0 O  
ATOM   2464  CB  THR A 156     154.468 120.662 132.327  1.00  0.00           C  
ATOM   2465  OG1 THR A 156     154.829 122.028 132.170  1.00  0.00           O  
ATOM   2466  CG2 THR A 156     155.249 120.266 133.596  1.00  0.00           C  
ATOM   2467  H   THR A 156     153.480 120.927 129.930  1.00  0.00         0 H  
ATOM   2468  HB  THR A 156     153.396 120.589 132.519  1.00  0.00           H  
ATOM   2469  HG1 THR A 156     154.275 122.440 131.503  1.00  0.00           H  
ATOM   2470 HG21 THR A 156     154.904 120.828 134.465  1.00  0.00           H  
ATOM   2471 HG22 THR A 156     155.155 119.208 133.831  1.00  0.00           H  
ATOM   2472 HG23 THR A 156     156.316 120.465 133.482  1.00  0.00           H  
ATOM   2473  HA  THR A 156     155.947 119.939 130.951  1.00  0.00           H  
ATOM   2474  N   LEU A 157     153.388 117.916 131.134  1.00  0.00         0 N  
ATOM   2475  CA  LEU A 157     152.950 116.550 131.292  1.00  0.00         0 C  
ATOM   2476  C   LEU A 157     153.330 115.645 130.126  1.00  0.00         0 C  
ATOM   2477  O   LEU A 157     153.042 114.454 130.141  1.00  0.00         0 O  
ATOM   2478  CB  LEU A 157     151.401 116.570 131.445  1.00  0.00         0 C  
ATOM   2479  CG  LEU A 157     150.818 115.774 132.647  1.00  0.00           C  
ATOM   2480  CD1 LEU A 157     151.177 114.288 132.578  1.00  0.00           C  
ATOM   2481  CD2 LEU A 157     151.257 116.364 133.994  1.00  0.00           C  
ATOM   2482  H   LEU A 157     152.685 118.617 130.918  1.00  0.00         0 H  
ATOM   2483  HA  LEU A 157     153.399 116.144 132.201  1.00  0.00           H  
ATOM   2484  HB2 LEU A 157     151.057 117.602 131.534  1.00  0.00           H  
ATOM   2485  HB3 LEU A 157     150.955 116.203 130.518  1.00  0.00           H  
ATOM   2486  HG  LEU A 157     149.733 115.831 132.651  1.00  0.00           H  
ATOM   2487 HD11 LEU A 157     150.760 113.733 133.419  1.00  0.00           H  
ATOM   2488 HD12 LEU A 157     150.790 113.834 131.667  1.00  0.00           H  
ATOM   2489 HD13 LEU A 157     152.258 114.145 132.596  1.00  0.00           H  
ATOM   2490 HD21 LEU A 157     150.797 115.828 134.824  1.00  0.00           H  
ATOM   2491 HD22 LEU A 157     152.335 116.310 134.131  1.00  0.00           H  
ATOM   2492 HD23 LEU A 157     150.963 117.410 134.082  1.00  0.00           H  
ATOM   2493  N   GLY A 158     153.990 116.187 129.114  1.00  0.00         0 N  
ATOM   2494  CA  GLY A 158     154.421 115.396 127.997  1.00  0.00         0 C  
ATOM   2495  C   GLY A 158     155.892 115.052 127.985  1.00  0.00         0 C  
ATOM   2496  O   GLY A 158     156.294 114.119 127.294  1.00  0.00         0 O  
ATOM   2497  H   GLY A 158     154.153 117.185 129.105  1.00  0.00         0 H  
ATOM   2498  HA3 GLY A 158     154.222 115.983 127.100  1.00  0.00           H  
ATOM   2499  HA2 GLY A 158     153.842 114.479 127.865  1.00  0.00           H  
ATOM   2500  N   ALA A 159     156.692 115.814 128.726  1.00  0.00         0 N  
ATOM   2501  CA  ALA A 159     158.137 115.739 128.643  1.00  0.00         0 C  
ATOM   2502  C   ALA A 159     158.773 115.201 129.905  1.00  0.00         0 C  
ATOM   2503  O   ALA A 159     159.790 114.510 129.847  1.00  0.00         0 O  
ATOM   2504  CB  ALA A 159     158.657 117.161 128.378  1.00  0.00         0 C  
ATOM   2505  H   ALA A 159     156.271 116.585 129.229  1.00  0.00         0 H  
ATOM   2506  HA  ALA A 159     158.466 115.103 127.818  1.00  0.00           H  
ATOM   2507  HB1 ALA A 159     159.745 117.178 128.307  1.00  0.00           H  
ATOM   2508  HB2 ALA A 159     158.268 117.543 127.433  1.00  0.00           H  
ATOM   2509  HB3 ALA A 159     158.361 117.861 129.160  1.00  0.00           H  
ATOM   2510  N   THR A 160     158.148 115.478 131.044  1.00  0.00         0 N  
ATOM   2511  CA  THR A 160     158.608 114.968 132.321  1.00  0.00         0 C  
ATOM   2512  C   THR A 160     157.658 113.838 132.734  1.00  0.00         0 C  
ATOM   2513  O   THR A 160     157.942 113.119 133.695  1.00  0.00         0 O  
ATOM   2514  CB  THR A 160     158.720 116.094 133.373  1.00  0.00         0 C  
ATOM   2515  OG1 THR A 160     157.432 116.692 133.556  1.00  0.00           O  
ATOM   2516  CG2 THR A 160     159.723 117.189 132.990  1.00  0.00           C  
ATOM   2517  H   THR A 160     157.333 116.076 131.035  1.00  0.00         0 H  
ATOM   2518  HA  THR A 160     159.654 114.672 132.239  1.00  0.00           H  
ATOM   2519  HB3 THR A 160     159.090 115.680 134.311  1.00  0.00           H  
ATOM   2520  HG1 THR A 160     157.127 117.057 132.722  1.00  0.00           H  
ATOM   2521 HG21 THR A 160     159.751 117.947 133.773  1.00  0.00           H  
ATOM   2522 HG22 THR A 160     160.714 116.750 132.874  1.00  0.00           H  
ATOM   2523 HG23 THR A 160     159.418 117.649 132.050  1.00  0.00           H  
ATOM   2524  N   GLN A 161     156.560 113.719 131.993  1.00  0.00         0 N  
ATOM   2525  CA  GLN A 161     155.549 112.700 132.243  1.00  0.00         0 C  
ATOM   2526  C   GLN A 161     154.964 112.234 130.902  1.00  0.00         0 C  
ATOM   2527  O   GLN A 161     154.562 113.043 130.065  1.00  0.00         0 O  
ATOM   2528  CB  GLN A 161     154.482 113.200 133.242  1.00  0.00           C  
ATOM   2529  CG  GLN A 161     154.828 113.164 134.740  1.00  0.00           C  
ATOM   2530  CD  GLN A 161     154.912 111.770 135.343  1.00  0.00           C  
ATOM   2531  OE1 GLN A 161     154.235 110.846 134.905  1.00  0.00           O  
ATOM   2532  NE2 GLN A 161     155.743 111.602 136.367  1.00  0.00           N  
ATOM   2533  H   GLN A 161     156.400 114.350 131.221  1.00  0.00         0 H  
ATOM   2534  HB2 GLN A 161     154.245 114.242 133.029  1.00  0.00           H  
ATOM   2535  HB3 GLN A 161     153.581 112.595 133.144  1.00  0.00           H  
ATOM   2536  HG2 GLN A 161     155.798 113.635 134.901  1.00  0.00           H  
ATOM   2537  HG3 GLN A 161     154.065 113.703 135.302  1.00  0.00           H  
ATOM   2538 HE22 GLN A 161     155.833 110.695 136.801  1.00  0.00           H  
ATOM   2539 HE21 GLN A 161     156.284 112.383 136.711  1.00  0.00           H  
ATOM   2540  HA  GLN A 161     155.977 111.904 132.852  1.00  0.00           H  
ATOM   2541  N   PRO A 162     154.915 110.916 130.696  1.00  0.00         0 N  
ATOM   2542  CA  PRO A 162     154.385 110.351 129.472  1.00  0.00         0 C  
ATOM   2543  C   PRO A 162     152.866 110.447 129.465  1.00  0.00         0 C  
ATOM   2544  O   PRO A 162     152.249 110.467 128.403  1.00  0.00         0 O  
ATOM   2545  CB  PRO A 162     154.858 108.897 129.485  1.00  0.00         0 C  
ATOM   2546  CG  PRO A 162     154.702 108.457 130.941  1.00  0.00           C  
ATOM   2547  CD  PRO A 162     155.392 109.557 131.749  1.00  0.00           C  
ATOM   2548  HA  PRO A 162     154.781 110.899 128.617  1.00  0.00           H  
ATOM   2549  HB1 PRO A 162     154.248 108.287 128.818  1.00  0.00           H  
ATOM   2550  HB2 PRO A 162     155.896 108.827 129.158  1.00  0.00           H  
ATOM   2551  HG2 PRO A 162     153.649 108.370 131.206  1.00  0.00           H  
ATOM   2552  HG3 PRO A 162     155.176 107.489 131.104  1.00  0.00           H  
ATOM   2553  HD2 PRO A 162     154.929 109.662 132.730  1.00  0.00           H  
ATOM   2554  HD3 PRO A 162     156.447 109.325 131.893  1.00  0.00           H  
ATOM   2555  N   ARG A 163     152.293 110.504 130.664  1.00  0.00         0 N  
ATOM   2556  CA  ARG A 163     150.850 110.598 130.846  1.00  0.00         0 C  
ATOM   2557  C   ARG A 163     150.545 111.020 132.293  1.00  0.00         0 C  
ATOM   2558  O   ARG A 163     151.440 111.137 133.130  1.00  0.00         0 O  
ATOM   2559  CB  ARG A 163     150.162 109.283 130.410  1.00  0.00         0 C  
ATOM   2560  CG  ARG A 163     150.350 108.006 131.259  1.00  0.00           C  
ATOM   2561  CD  ARG A 163     149.663 106.714 130.815  1.00  0.00           C  
ATOM   2562  NE  ARG A 163     150.397 106.033 129.744  1.00  0.00           N  
ATOM   2563  CZ  ARG A 163     149.927 104.989 129.038  1.00  0.00           C  
ATOM   2564  NH1 ARG A 163     148.697 104.491 129.292  1.00  0.00           N  
ATOM   2565  NH2 ARG A 163     150.715 104.452 128.085  1.00  0.00           N1+
ATOM   2566  H   ARG A 163     152.863 110.484 131.498  1.00  0.00         0 H  
ATOM   2567  HA  ARG A 163     150.429 111.252 130.081  1.00  0.00           H  
ATOM   2568  HB2 ARG A 163     149.082 109.429 130.383  1.00  0.00           H  
ATOM   2569  HB3 ARG A 163     150.514 108.999 129.418  1.00  0.00           H  
ATOM   2570  HG2 ARG A 163     149.976 108.181 132.268  1.00  0.00           H  
ATOM   2571  HG3 ARG A 163     151.409 107.751 131.304  1.00  0.00           H  
ATOM   2572  HD2 ARG A 163     148.663 106.942 130.446  1.00  0.00           H  
ATOM   2573  HD3 ARG A 163     149.591 106.031 131.661  1.00  0.00           H  
ATOM   2574  HE  ARG A 163     151.317 106.402 129.549  1.00  0.00           H  
ATOM   2575 HH11 ARG A 163     148.349 103.707 128.759  1.00  0.00           H  
ATOM   2576 HH12 ARG A 163     148.126 104.903 130.016  1.00  0.00           H  
ATOM   2577 HH21 ARG A 163     150.386 103.667 127.541  1.00  0.00           H  
ATOM   2578 HH22 ARG A 163     151.634 104.834 127.915  1.00  0.00           H  
ATOM   2579  N   GLU A 164     149.262 111.244 132.564  1.00  0.00         0 N  
ATOM   2580  CA  GLU A 164     148.778 111.649 133.869  1.00  0.00         0 C  
ATOM   2581  C   GLU A 164     147.987 110.503 134.514  1.00  0.00         0 C  
ATOM   2582  O   GLU A 164     147.714 110.508 135.715  1.00  0.00         0 O  
ATOM   2583  CB  GLU A 164     147.946 112.938 133.761  1.00  0.00         0 C  
ATOM   2584  CG  GLU A 164     146.437 112.770 133.524  1.00  0.00           C  
ATOM   2585  CD  GLU A 164     146.024 112.252 132.149  1.00  0.00           C  
ATOM   2586  OE1 GLU A 164     146.930 112.005 131.322  1.00  0.00           O1-
ATOM   2587  OE2 GLU A 164     144.799 112.108 131.952  1.00  0.00           O  
ATOM   2588  H   GLU A 164     148.567 111.133 131.840  1.00  0.00         0 H  
ATOM   2589  HA  GLU A 164     149.616 111.980 134.481  1.00  0.00           H  
ATOM   2590  HB2 GLU A 164     148.038 113.508 134.686  1.00  0.00           H  
ATOM   2591  HB3 GLU A 164     148.311 113.538 132.928  1.00  0.00           H  
ATOM   2592  HG2 GLU A 164     145.940 113.732 133.644  1.00  0.00           H  
ATOM   2593  HG3 GLU A 164     146.032 112.060 134.246  1.00  0.00           H  
ATOM   2594  N   VAL A 165     147.628 109.524 133.688  1.00  0.00         0 N  
ATOM   2595  CA  VAL A 165     146.869 108.352 134.130  1.00  0.00         0 C  
ATOM   2596  C   VAL A 165     147.804 107.412 134.908  1.00  0.00         0 C  
ATOM   2597  O   VAL A 165     148.986 107.283 134.594  1.00  0.00         0 O  
ATOM   2598  CB  VAL A 165     146.143 107.683 132.935  1.00  0.00         0 C  
ATOM   2599  CG1 VAL A 165     145.173 106.628 133.468  1.00  0.00           C  
ATOM   2600  CG2 VAL A 165     145.358 108.697 132.091  1.00  0.00           C  
ATOM   2601  H   VAL A 165     147.878 109.571 132.711  1.00  0.00         0 H  
ATOM   2602  HA  VAL A 165     145.984 108.677 134.676  1.00  0.00           H  
ATOM   2603  HB3 VAL A 165     146.877 107.222 132.275  1.00  0.00           H  
ATOM   2604 HG11 VAL A 165     144.657 106.152 132.634  1.00  0.00           H  
ATOM   2605 HG12 VAL A 165     145.727 105.875 134.029  1.00  0.00           H  
ATOM   2606 HG13 VAL A 165     144.442 107.103 134.123  1.00  0.00           H  
ATOM   2607 HG21 VAL A 165     144.867 108.181 131.266  1.00  0.00           H  
ATOM   2608 HG22 VAL A 165     144.607 109.184 132.712  1.00  0.00           H  
ATOM   2609 HG23 VAL A 165     146.042 109.447 131.693  1.00  0.00           H  
ATOM   2610  N   TYR A 166     147.244 106.763 135.925  1.00  0.00         0 N  
ATOM   2611  CA  TYR A 166     147.979 105.831 136.772  1.00  0.00         0 C  
ATOM   2612  C   TYR A 166     147.684 104.388 136.332  1.00  0.00         0 C  
ATOM   2613  O   TYR A 166     146.532 103.963 136.260  1.00  0.00         0 O  
ATOM   2614  CB  TYR A 166     147.645 106.114 138.248  1.00  0.00           C  
ATOM   2615  CG  TYR A 166     146.268 106.672 138.554  1.00  0.00           C  
ATOM   2616  CD1 TYR A 166     146.009 108.042 138.372  1.00  0.00           C  
ATOM   2617  CD2 TYR A 166     145.253 105.828 139.039  1.00  0.00           C  
ATOM   2618  CE1 TYR A 166     144.735 108.564 138.658  1.00  0.00           C  
ATOM   2619  CE2 TYR A 166     143.979 106.348 139.323  1.00  0.00           C  
ATOM   2620  CZ  TYR A 166     143.718 107.717 139.130  1.00  0.00           C  
ATOM   2621  OH  TYR A 166     142.481 108.225 139.403  1.00  0.00           O  
ATOM   2622  H   TYR A 166     146.267 106.906 136.139  1.00  0.00         0 H  
ATOM   2623  HB2 TYR A 166     147.717 105.189 138.821  1.00  0.00           H  
ATOM   2624  HB3 TYR A 166     148.349 106.844 138.647  1.00  0.00           H  
ATOM   2625  HD1 TYR A 166     146.790 108.696 138.012  1.00  0.00           H  
ATOM   2626  HD2 TYR A 166     145.452 104.778 139.194  1.00  0.00           H  
ATOM   2627  HE1 TYR A 166     144.538 109.616 138.514  1.00  0.00           H  
ATOM   2628  HE2 TYR A 166     143.199 105.697 139.690  1.00  0.00           H  
ATOM   2629  HH  TYR A 166     141.907 107.522 139.714  1.00  0.00           H  
ATOM   2630  HA  TYR A 166     149.038 106.086 136.759  1.00  0.00           H  
ATOM   2631  N   THR A 167     148.752 103.650 136.042  1.00  0.00         0 N  
ATOM   2632  CA  THR A 167     148.692 102.265 135.608  1.00  0.00         0 C  
ATOM   2633  C   THR A 167     149.357 101.413 136.695  1.00  0.00         0 C  
ATOM   2634  O   THR A 167     148.776 100.419 137.136  1.00  0.00         0 O  
ATOM   2635  CB  THR A 167     149.323 102.082 134.209  1.00  0.00         0 C  
ATOM   2636  OG1 THR A 167     150.695 102.488 134.260  1.00  0.00           O  
ATOM   2637  CG2 THR A 167     148.611 102.882 133.111  1.00  0.00           C  
ATOM   2638  H   THR A 167     149.677 104.049 136.117  1.00  0.00         0 H  
ATOM   2639  HA  THR A 167     147.658 101.996 135.392  1.00  0.00           H  
ATOM   2640  HB3 THR A 167     149.239 101.039 133.905  1.00  0.00           H  
ATOM   2641  HG1 THR A 167     151.094 102.377 133.394  1.00  0.00           H  
ATOM   2642 HG21 THR A 167     149.106 102.707 132.155  1.00  0.00           H  
ATOM   2643 HG22 THR A 167     147.571 102.562 133.044  1.00  0.00           H  
ATOM   2644 HG23 THR A 167     148.650 103.944 133.351  1.00  0.00           H  
ATOM   2645  N   ARG A 168     150.556 101.830 137.091  1.00  0.00         0 N  
ATOM   2646  CA  ARG A 168     151.333 101.142 138.115  1.00  0.00         0 C  
ATOM   2647  C   ARG A 168     151.807 102.160 139.166  1.00  0.00         0 C  
ATOM   2648  O   ARG A 168     151.723 101.925 140.371  1.00  0.00         0 O  
ATOM   2649  CB  ARG A 168     152.473 100.319 137.470  1.00  0.00         0 C  
ATOM   2650  CG  ARG A 168     152.129  99.199 136.462  1.00  0.00           C  
ATOM   2651  CD  ARG A 168     151.254  98.033 136.922  1.00  0.00           C  
ATOM   2652  NE  ARG A 168     151.020  97.057 135.852  1.00  0.00           N  
ATOM   2653  CZ  ARG A 168     149.900  96.990 135.109  1.00  0.00           C  
ATOM   2654  NH1 ARG A 168     148.888  97.859 135.320  1.00  0.00           N  
ATOM   2655  NH2 ARG A 168     149.815  96.033 134.163  1.00  0.00           N1+
ATOM   2656  H   ARG A 168     150.965 102.657 136.680  1.00  0.00         0 H  
ATOM   2657  HA  ARG A 168     150.752 100.310 138.515  1.00  0.00           H  
ATOM   2658  HB2 ARG A 168     153.041  99.811 138.249  1.00  0.00           H  
ATOM   2659  HB3 ARG A 168     153.133 100.985 136.914  1.00  0.00           H  
ATOM   2660  HG2 ARG A 168     153.048  98.729 136.112  1.00  0.00           H  
ATOM   2661  HG3 ARG A 168     151.593  99.625 135.613  1.00  0.00           H  
ATOM   2662  HD2 ARG A 168     150.286  98.411 137.250  1.00  0.00           H  
ATOM   2663  HD3 ARG A 168     151.741  97.516 137.749  1.00  0.00           H  
ATOM   2664  HE  ARG A 168     151.773  96.404 135.690  1.00  0.00           H  
ATOM   2665 HH11 ARG A 168     148.050  97.804 134.759  1.00  0.00           H  
ATOM   2666 HH12 ARG A 168     148.969  98.563 136.039  1.00  0.00           H  
ATOM   2667 HH21 ARG A 168     148.985  95.961 133.591  1.00  0.00           H  
ATOM   2668 HH22 ARG A 168     150.580  95.388 134.026  1.00  0.00           H  
ATOM   2669  N   LYS A 169     152.307 103.299 138.696  1.00  0.00         0 N  
ATOM   2670  CA  LYS A 169     152.875 104.328 139.657  1.00  0.00         0 C  
ATOM   2671  C   LYS A 169     153.592 105.685 139.656  1.00  0.00         0 C  
ATOM   2672  O   LYS A 169     154.446 106.051 140.463  1.00  0.00         0 O  
ATOM   2673  CB  LYS A 169     153.859 103.472 140.461  1.00  0.00         0 C  
ATOM   2674  CG  LYS A 169     154.798 102.641 139.582  1.00  0.00           C  
ATOM   2675  CD  LYS A 169     156.074 102.164 140.288  1.00  0.00           C  
ATOM   2676  CE  LYS A 169     157.271 103.119 140.191  1.00  0.00           C  
ATOM   2677  NZ  LYS A 169     158.469 102.613 140.885  1.00  0.00           N1+
ATOM   2678  H   LYS A 169     152.359 103.455 137.699  1.00  0.00         0 H  
ATOM   2679  HA  LYS A 169     152.002 104.550 140.270  1.00  0.00           H  
ATOM   2680  HB2 LYS A 169     154.479 104.118 141.083  1.00  0.00           H  
ATOM   2681  HB3 LYS A 169     153.306 102.780 141.095  1.00  0.00           H  
ATOM   2682  HG2 LYS A 169     155.114 103.234 138.724  1.00  0.00           H  
ATOM   2683  HG3 LYS A 169     154.276 101.749 139.234  1.00  0.00           H  
ATOM   2684  HD2 LYS A 169     155.872 102.027 141.350  1.00  0.00           H  
ATOM   2685  HD3 LYS A 169     156.397 101.217 139.855  1.00  0.00           H  
ATOM   2686  HE2 LYS A 169     157.534 103.267 139.144  1.00  0.00           H  
ATOM   2687  HE3 LYS A 169     157.009 104.077 140.638  1.00  0.00           H  
ATOM   2688  HZ1 LYS A 169     158.747 101.731 140.479  1.00  0.00           H  
ATOM   2689  HZ2 LYS A 169     159.221 103.280 140.788  1.00  0.00           H  
ATOM   2690  HZ3 LYS A 169     158.260 102.482 141.865  1.00  0.00           H  
ATOM   2691  N   ASN A 170     153.156 106.439 138.651  1.00  0.00         0 N  
ATOM   2692  CA  ASN A 170     153.655 107.790 138.407  1.00  0.00         0 C  
ATOM   2693  C   ASN A 170     153.714 108.552 139.738  1.00  0.00         0 C  
ATOM   2694  O   ASN A 170     152.695 108.816 140.370  1.00  0.00         0 O  
ATOM   2695  CB  ASN A 170     152.818 108.495 137.321  1.00  0.00         0 C  
ATOM   2696  CG  ASN A 170     152.588 107.720 136.024  1.00  0.00           C  
ATOM   2697  OD1 ASN A 170     152.357 106.517 136.023  1.00  0.00           O  
ATOM   2698  ND2 ASN A 170     152.605 108.422 134.892  1.00  0.00           N  
ATOM   2699  H   ASN A 170     152.453 106.083 138.020  1.00  0.00         0 H  
ATOM   2700  HA  ASN A 170     154.603 107.737 137.872  1.00  0.00           H  
ATOM   2701  HB2 ASN A 170     151.826 108.717 137.714  1.00  0.00           H  
ATOM   2702  HB3 ASN A 170     153.309 109.423 137.029  1.00  0.00           H  
ATOM   2703 HD21 ASN A 170     152.458 107.958 134.008  1.00  0.00           H  
ATOM   2704 HD22 ASN A 170     152.765 109.419 134.919  1.00  0.00           H  
ATOM   2705  N   VAL A 171     154.933 108.895 140.142  1.00  0.00         0 N  
ATOM   2706  CA  VAL A 171     155.179 109.625 141.387  1.00  0.00         0 C  
ATOM   2707  C   VAL A 171     154.554 111.026 141.281  1.00  0.00         0 C  
ATOM   2708  O   VAL A 171     154.617 111.676 140.238  1.00  0.00         0 O  
ATOM   2709  CB  VAL A 171     156.690 109.626 141.737  1.00  0.00           C  
ATOM   2710  CG1 VAL A 171     157.463 110.300 140.602  1.00  0.00           C  
ATOM   2711  CG2 VAL A 171     156.982 110.369 143.047  1.00  0.00           C  
ATOM   2712  H   VAL A 171     155.738 108.652 139.583  1.00  0.00         0 H  
ATOM   2713  HB  VAL A 171     157.033 108.600 141.870  1.00  0.00           H  
ATOM   2714 HG11 VAL A 171     158.527 110.305 140.840  1.00  0.00           H  
ATOM   2715 HG12 VAL A 171     157.302 109.751 139.675  1.00  0.00           H  
ATOM   2716 HG13 VAL A 171     157.114 111.326 140.482  1.00  0.00           H  
ATOM   2717 HG21 VAL A 171     158.053 110.343 143.249  1.00  0.00           H  
ATOM   2718 HG22 VAL A 171     156.655 111.406 142.959  1.00  0.00           H  
ATOM   2719 HG23 VAL A 171     156.447 109.889 143.866  1.00  0.00           H  
ATOM   2720  HA  VAL A 171     154.834 109.030 142.232  1.00  0.00           H  
ATOM   2721  N   CYS A 172     153.955 111.463 142.385  1.00  0.00         0 N  
ATOM   2722  CA  CYS A 172     153.307 112.772 142.468  1.00  0.00         0 C  
ATOM   2723  C   CYS A 172     153.696 113.471 143.781  1.00  0.00         0 C  
ATOM   2724  O   CYS A 172     153.498 114.673 143.947  1.00  0.00         0 O  
ATOM   2725  CB  CYS A 172     151.784 112.625 142.299  1.00  0.00           C  
ATOM   2726  SG  CYS A 172     150.913 112.369 143.873  1.00  0.00           S  
ATOM   2727  H   CYS A 172     153.936 110.884 143.212  1.00  0.00         0 H  
ATOM   2728  HB2 CYS A 172     151.380 113.528 141.841  1.00  0.00           H  
ATOM   2729  HB3 CYS A 172     151.570 111.768 141.660  1.00  0.00           H  
ATOM   2730  HA  CYS A 172     153.550 113.356 141.581  1.00  0.00           H  
ATOM   2731  N   TRP A 173     154.253 112.700 144.711  1.00  0.00         0 N  
ATOM   2732  CA  TRP A 173     154.679 113.204 146.009  1.00  0.00         0 C  
ATOM   2733  C   TRP A 173     155.699 112.237 146.632  1.00  0.00         0 C  
ATOM   2734  O   TRP A 173     155.433 111.044 146.785  1.00  0.00         0 O  
ATOM   2735  CB  TRP A 173     153.438 113.431 146.887  1.00  0.00           C  
ATOM   2736  CG  TRP A 173     153.666 113.952 148.273  1.00  0.00           C  
ATOM   2737  CD1 TRP A 173     153.307 113.320 149.414  1.00  0.00           C  
ATOM   2738  CD2 TRP A 173     154.299 115.203 148.680  1.00  0.00           C  
ATOM   2739  NE1 TRP A 173     153.669 114.099 150.496  1.00  0.00           N  
ATOM   2740  CE2 TRP A 173     154.282 115.270 150.102  1.00  0.00           C  
ATOM   2741  CE3 TRP A 173     154.889 116.284 147.996  1.00  0.00           C  
ATOM   2742  CZ2 TRP A 173     154.815 116.358 150.809  1.00  0.00           C  
ATOM   2743  CZ3 TRP A 173     155.425 117.383 148.691  1.00  0.00           C  
ATOM   2744  CH2 TRP A 173     155.389 117.423 150.096  1.00  0.00           C  
ATOM   2745  H   TRP A 173     154.397 111.716 144.532  1.00  0.00         0 H  
ATOM   2746  HB2 TRP A 173     152.906 112.488 147.015  1.00  0.00           H  
ATOM   2747  HB3 TRP A 173     152.781 114.157 146.408  1.00  0.00           H  
ATOM   2748  HD1 TRP A 173     152.818 112.358 149.367  1.00  0.00           H  
ATOM   2749  HE1 TRP A 173     153.475 113.780 151.435  1.00  0.00           H  
ATOM   2750  HE3 TRP A 173     154.937 116.279 146.917  1.00  0.00           H  
ATOM   2751  HZ2 TRP A 173     154.780 116.370 151.889  1.00  0.00           H  
ATOM   2752  HZ3 TRP A 173     155.869 118.203 148.146  1.00  0.00           H  
ATOM   2753  HH2 TRP A 173     155.800 118.269 150.627  1.00  0.00           H  
ATOM   2754  HA  TRP A 173     155.065 114.217 145.897  1.00  0.00           H  
ATOM   2755  N   LEU A 174     156.861 112.782 146.983  1.00  0.00         0 N  
ATOM   2756  CA  LEU A 174     157.954 112.043 147.586  1.00  0.00         0 C  
ATOM   2757  C   LEU A 174     158.790 113.041 148.384  1.00  0.00         0 C  
ATOM   2758  O   LEU A 174     158.778 114.233 148.073  1.00  0.00         0 O  
ATOM   2759  CB  LEU A 174     158.765 111.231 146.539  1.00  0.00           C  
ATOM   2760  CG  LEU A 174     159.830 110.192 146.967  1.00  0.00           C  
ATOM   2761  CD1 LEU A 174     159.236 109.072 147.818  1.00  0.00           C  
ATOM   2762  CD2 LEU A 174     160.542 109.613 145.744  1.00  0.00           C  
ATOM   2763  H   LEU A 174     157.022 113.768 146.833  1.00  0.00         0 H  
ATOM   2764  HB2 LEU A 174     159.329 111.916 145.905  1.00  0.00           H  
ATOM   2765  HB3 LEU A 174     158.082 110.646 145.924  1.00  0.00           H  
ATOM   2766  HG  LEU A 174     160.642 110.696 147.490  1.00  0.00           H  
ATOM   2767 HD11 LEU A 174     160.021 108.368 148.093  1.00  0.00           H  
ATOM   2768 HD12 LEU A 174     158.796 109.496 148.721  1.00  0.00           H  
ATOM   2769 HD13 LEU A 174     158.465 108.552 147.249  1.00  0.00           H  
ATOM   2770 HD21 LEU A 174     161.286 108.885 146.068  1.00  0.00           H  
ATOM   2771 HD22 LEU A 174     159.815 109.125 145.096  1.00  0.00           H  
ATOM   2772 HD23 LEU A 174     161.035 110.416 145.196  1.00  0.00           H  
ATOM   2773  HA  LEU A 174     157.556 111.203 148.154  1.00  0.00           H  
ATOM   2774  N   ASN A 175     159.489 112.521 149.388  1.00  0.00         0 N  
ATOM   2775  CA  ASN A 175     160.342 113.329 150.256  1.00  0.00         0 C  
ATOM   2776  C   ASN A 175     161.782 113.282 149.728  1.00  0.00         0 C  
ATOM   2777  O   ASN A 175     162.135 112.441 148.906  1.00  0.00         0 O  
ATOM   2778  CB  ASN A 175     160.202 112.890 151.726  1.00  0.00           C  
ATOM   2779  CG  ASN A 175     160.175 114.002 152.774  1.00  0.00           C  
ATOM   2780  OD1 ASN A 175     159.222 114.765 152.880  1.00  0.00           O  
ATOM   2781  ND2 ASN A 175     161.217 114.077 153.599  1.00  0.00           N  
ATOM   2782  H   ASN A 175     159.442 111.530 149.577  1.00  0.00         0 H  
ATOM   2783  HB2 ASN A 175     159.269 112.339 151.854  1.00  0.00           H  
ATOM   2784  HB3 ASN A 175     161.041 112.249 151.996  1.00  0.00           H  
ATOM   2785 HD22 ASN A 175     161.247 114.794 154.310  1.00  0.00           H  
ATOM   2786 HD21 ASN A 175     161.977 113.417 153.515  1.00  0.00           H  
ATOM   2787  HA  ASN A 175     159.924 114.332 150.345  1.00  0.00           H  
ATOM   2788  N   TRP A 176     162.613 114.200 150.213  1.00  0.00         0 N  
ATOM   2789  CA  TRP A 176     164.013 114.294 149.818  1.00  0.00         0 C  
ATOM   2790  C   TRP A 176     164.113 114.415 148.289  1.00  0.00         0 C  
ATOM   2791  O   TRP A 176     164.990 113.822 147.660  1.00  0.00         0 O  
ATOM   2792  CB  TRP A 176     164.772 113.085 150.385  1.00  0.00           C  
ATOM   2793  CG  TRP A 176     164.419 112.644 151.773  1.00  0.00           C  
ATOM   2794  CD1 TRP A 176     163.941 111.424 152.107  1.00  0.00           C  
ATOM   2795  CD2 TRP A 176     164.509 113.403 153.017  1.00  0.00           C  
ATOM   2796  NE1 TRP A 176     163.724 111.380 153.471  1.00  0.00           N  
ATOM   2797  CE2 TRP A 176     164.055 112.572 154.081  1.00  0.00           C  
ATOM   2798  CE3 TRP A 176     164.931 114.703 153.357  1.00  0.00           C  
ATOM   2799  CZ2 TRP A 176     164.013 113.013 155.412  1.00  0.00           C  
ATOM   2800  CZ3 TRP A 176     164.893 115.160 154.687  1.00  0.00           C  
ATOM   2801  CH2 TRP A 176     164.434 114.318 155.715  1.00  0.00           C  
ATOM   2802  H   TRP A 176     162.283 114.874 150.889  1.00  0.00         0 H  
ATOM   2803  HB2 TRP A 176     164.598 112.215 149.751  1.00  0.00           H  
ATOM   2804  HB3 TRP A 176     165.839 113.305 150.413  1.00  0.00           H  
ATOM   2805  HD1 TRP A 176     163.791 110.675 151.344  1.00  0.00           H  
ATOM   2806  HE1 TRP A 176     163.364 110.539 153.899  1.00  0.00           H  
ATOM   2807  HE3 TRP A 176     165.293 115.372 152.590  1.00  0.00           H  
ATOM   2808  HZ2 TRP A 176     163.661 112.350 156.189  1.00  0.00           H  
ATOM   2809  HZ3 TRP A 176     165.217 116.162 154.924  1.00  0.00           H  
ATOM   2810  HH2 TRP A 176     164.404 114.672 156.735  1.00  0.00           H  
ATOM   2811  HA  TRP A 176     164.484 115.124 150.343  1.00  0.00           H  
ATOM   2812  N   GLU A 177     163.197 115.192 147.716  1.00  0.00         0 N  
ATOM   2813  CA  GLU A 177     163.128 115.430 146.288  1.00  0.00         0 C  
ATOM   2814  C   GLU A 177     163.765 116.785 145.950  1.00  0.00         0 C  
ATOM   2815  O   GLU A 177     163.828 117.689 146.783  1.00  0.00         0 O  
ATOM   2816  CB  GLU A 177     161.676 115.332 145.793  1.00  0.00         0 C  
ATOM   2817  CG  GLU A 177     161.441 115.562 144.291  1.00  0.00           C  
ATOM   2818  CD  GLU A 177     162.155 114.604 143.342  1.00  0.00           C  
ATOM   2819  OE1 GLU A 177     162.208 113.395 143.663  1.00  0.00           O1-
ATOM   2820  OE2 GLU A 177     162.634 115.102 142.302  1.00  0.00           O  
ATOM   2821  H   GLU A 177     162.501 115.654 148.284  1.00  0.00         0 H  
ATOM   2822  HA  GLU A 177     163.596 114.600 145.758  1.00  0.00           H  
ATOM   2823  HB2 GLU A 177     161.285 114.336 146.004  1.00  0.00           H  
ATOM   2824  HB3 GLU A 177     161.066 116.077 146.304  1.00  0.00           H  
ATOM   2825  HG2 GLU A 177     160.378 115.466 144.070  1.00  0.00           H  
ATOM   2826  HG3 GLU A 177     161.779 116.561 144.019  1.00  0.00           H  
ATOM   2827  N   ASP A 178     164.231 116.900 144.710  1.00  0.00         0 N  
ATOM   2828  CA  ASP A 178     164.872 118.090 144.172  1.00  0.00         0 C  
ATOM   2829  C   ASP A 178     163.856 119.241 144.123  1.00  0.00         0 C  
ATOM   2830  O   ASP A 178     164.110 120.353 144.586  1.00  0.00         0 O  
ATOM   2831  CB  ASP A 178     165.497 117.743 142.807  1.00  0.00           C  
ATOM   2832  CG  ASP A 178     166.719 116.821 142.841  1.00  0.00           C  
ATOM   2833  OD1 ASP A 178     166.505 115.593 142.968  1.00  0.00           O1-
ATOM   2834  OD2 ASP A 178     167.841 117.365 142.782  1.00  0.00           O  
ATOM   2835  H   ASP A 178     164.152 116.126 144.067  1.00  0.00         0 H  
ATOM   2836  HB2 ASP A 178     164.757 117.240 142.185  1.00  0.00           H  
ATOM   2837  HB3 ASP A 178     165.824 118.658 142.314  1.00  0.00           H  
ATOM   2838  HA  ASP A 178     165.765 118.317 144.755  1.00  0.00           H  
ATOM   2839  N   THR A 179     162.692 118.950 143.548  1.00  0.00         0 N  
ATOM   2840  CA  THR A 179     161.598 119.895 143.400  1.00  0.00         0 C  
ATOM   2841  C   THR A 179     162.150 121.126 142.672  1.00  0.00         0 C  
ATOM   2842  O   THR A 179     161.945 122.252 143.132  1.00  0.00         0 O  
ATOM   2843  CB  THR A 179     160.948 120.225 144.762  1.00  0.00         0 C  
ATOM   2844  OG1 THR A 179     160.437 119.019 145.340  1.00  0.00           O  
ATOM   2845  CG2 THR A 179     159.808 121.246 144.662  1.00  0.00           C  
ATOM   2846  H   THR A 179     162.528 118.024 143.182  1.00  0.00         0 H  
ATOM   2847  HA  THR A 179     160.763 119.408 142.897  1.00  0.00           H  
ATOM   2848  HB3 THR A 179     161.688 120.684 145.418  1.00  0.00           H  
ATOM   2849  HG1 THR A 179     160.743 118.943 146.247  1.00  0.00           H  
ATOM   2850 HG21 THR A 179     159.396 121.431 145.654  1.00  0.00           H  
ATOM   2851 HG22 THR A 179     160.190 122.178 144.248  1.00  0.00           H  
ATOM   2852 HG23 THR A 179     159.025 120.854 144.012  1.00  0.00           H  
ATOM   2853  N   LYS A 180     162.836 120.891 141.557  1.00  0.00         0 N  
ATOM   2854  CA  LYS A 180     163.423 121.951 140.752  1.00  0.00         0 C  
ATOM   2855  C   LYS A 180     162.921 121.832 139.307  1.00  0.00         0 C  
ATOM   2856  O   LYS A 180     163.531 122.360 138.376  1.00  0.00         0 O  
ATOM   2857  CB  LYS A 180     164.948 121.871 140.870  1.00  0.00         0 C  
ATOM   2858  CG  LYS A 180     165.547 120.649 140.168  1.00  0.00           C  
ATOM   2859  CD  LYS A 180     167.032 120.408 140.468  1.00  0.00           C  
ATOM   2860  CE  LYS A 180     167.650 119.187 139.774  1.00  0.00           C  
ATOM   2861  NZ  LYS A 180     168.888 118.721 140.423  1.00  0.00           N1+
ATOM   2862  H   LYS A 180     162.967 119.943 141.236  1.00  0.00         0 H  
ATOM   2863  HA  LYS A 180     163.193 122.918 141.200  1.00  0.00           H  
ATOM   2864  HB2 LYS A 180     165.229 121.816 141.922  1.00  0.00           H  
ATOM   2865  HB3 LYS A 180     165.394 122.758 140.421  1.00  0.00           H  
ATOM   2866  HG2 LYS A 180     165.011 119.752 140.479  1.00  0.00           H  
ATOM   2867  HG3 LYS A 180     165.457 120.768 139.089  1.00  0.00           H  
ATOM   2868  HD2 LYS A 180     167.612 121.273 140.148  1.00  0.00           H  
ATOM   2869  HD3 LYS A 180     167.167 120.256 141.539  1.00  0.00           H  
ATOM   2870  HE2 LYS A 180     167.893 119.440 138.742  1.00  0.00           H  
ATOM   2871  HE3 LYS A 180     166.939 118.361 139.788  1.00  0.00           H  
ATOM   2872  HZ1 LYS A 180     169.248 117.919 139.925  1.00  0.00           H  
ATOM   2873  HZ2 LYS A 180     169.575 119.461 140.410  1.00  0.00           H  
ATOM   2874  HZ3 LYS A 180     168.691 118.462 141.379  1.00  0.00           H  
ATOM   2875  N   ALA A 181     161.803 121.128 139.150  1.00  0.00         0 N  
ATOM   2876  CA  ALA A 181     161.181 120.911 137.842  1.00  0.00         0 C  
ATOM   2877  C   ALA A 181     159.869 121.708 137.771  1.00  0.00         0 C  
ATOM   2878  O   ALA A 181     159.117 121.615 136.801  1.00  0.00         0 O  
ATOM   2879  CB  ALA A 181     161.024 119.396 137.552  1.00  0.00         0 C  
ATOM   2880  H   ALA A 181     161.348 120.717 139.952  1.00  0.00         0 H  
ATOM   2881  HA  ALA A 181     161.900 121.137 137.055  1.00  0.00           H  
ATOM   2882  HB1 ALA A 181     160.559 119.259 136.575  1.00  0.00           H  
ATOM   2883  HB2 ALA A 181     162.005 118.921 137.557  1.00  0.00           H  
ATOM   2884  HB3 ALA A 181     160.396 118.942 138.319  1.00  0.00           H  
ATOM   2885  N   LEU A 182     159.618 122.488 138.818  1.00  0.00         0 N  
ATOM   2886  CA  LEU A 182     158.436 123.320 138.946  1.00  0.00         0 C  
ATOM   2887  C   LEU A 182     158.839 124.740 138.571  1.00  0.00         0 C  
ATOM   2888  O   LEU A 182     158.166 125.705 138.946  1.00  0.00         0 O  
ATOM   2889  CB  LEU A 182     157.778 123.197 140.347  1.00  0.00           C  
ATOM   2890  CG  LEU A 182     158.605 123.342 141.648  1.00  0.00           C  
ATOM   2891  CD1 LEU A 182     159.281 124.707 141.754  1.00  0.00           C  
ATOM   2892  CD2 LEU A 182     157.733 123.080 142.876  1.00  0.00           C  
ATOM   2893  H   LEU A 182     160.272 122.526 139.587  1.00  0.00         0 H  
ATOM   2894  HB2 LEU A 182     157.010 123.962 140.457  1.00  0.00           H  
ATOM   2895  HB3 LEU A 182     157.325 122.211 140.451  1.00  0.00           H  
ATOM   2896  HG  LEU A 182     159.336 122.535 141.706  1.00  0.00           H  
ATOM   2897 HD11 LEU A 182     159.849 124.760 142.683  1.00  0.00           H  
ATOM   2898 HD12 LEU A 182     159.954 124.846 140.908  1.00  0.00           H  
ATOM   2899 HD13 LEU A 182     158.523 125.490 141.747  1.00  0.00           H  
ATOM   2900 HD21 LEU A 182     158.335 123.187 143.779  1.00  0.00           H  
ATOM   2901 HD22 LEU A 182     156.913 123.797 142.900  1.00  0.00           H  
ATOM   2902 HD23 LEU A 182     157.330 122.068 142.827  1.00  0.00           H  
ATOM   2903  HA  LEU A 182     157.624 122.891 138.359  1.00  0.00           H  
ATOM   2904  N   LEU A 183     159.894 124.862 137.758  1.00  0.00         0 N  
ATOM   2905  CA  LEU A 183     160.219 126.112 137.109  1.00  0.00         0 C  
ATOM   2906  C   LEU A 183     159.087 126.650 136.262  1.00  0.00         0 C  
ATOM   2907  O   LEU A 183     158.802 127.843 136.293  1.00  0.00         0 O  
ATOM   2908  CB  LEU A 183     161.475 126.032 136.225  1.00  0.00           C  
ATOM   2909  CG  LEU A 183     162.769 125.640 136.947  1.00  0.00           C  
ATOM   2910  CD1 LEU A 183     163.928 125.603 135.940  1.00  0.00           C  
ATOM   2911  CD2 LEU A 183     163.128 126.560 138.128  1.00  0.00           C  
ATOM   2912  H   LEU A 183     160.369 124.021 137.476  1.00  0.00         0 H  
ATOM   2913  HB2 LEU A 183     161.292 125.344 135.398  1.00  0.00           H  
ATOM   2914  HB3 LEU A 183     161.646 127.005 135.759  1.00  0.00           H  
ATOM   2915  HG  LEU A 183     162.603 124.643 137.340  1.00  0.00           H  
ATOM   2916 HD11 LEU A 183     164.834 125.192 136.384  1.00  0.00           H  
ATOM   2917 HD12 LEU A 183     163.682 124.996 135.070  1.00  0.00           H  
ATOM   2918 HD13 LEU A 183     164.166 126.603 135.575  1.00  0.00           H  
ATOM   2919 HD21 LEU A 183     164.114 126.315 138.525  1.00  0.00           H  
ATOM   2920 HD22 LEU A 183     163.146 127.608 137.830  1.00  0.00           H  
ATOM   2921 HD23 LEU A 183     162.429 126.452 138.957  1.00  0.00           H  
ATOM   2922  HA  LEU A 183     160.373 126.857 137.890  1.00  0.00           H  
ATOM   2923  N   ALA A 184     158.363 125.755 135.599  1.00  0.00         0 N  
ATOM   2924  CA  ALA A 184     157.234 126.092 134.777  1.00  0.00         0 C  
ATOM   2925  C   ALA A 184     155.947 126.360 135.570  1.00  0.00         0 C  
ATOM   2926  O   ALA A 184     154.829 126.011 135.185  1.00  0.00         0 O  
ATOM   2927  CB  ALA A 184     156.983 124.937 133.787  1.00  0.00         0 C  
ATOM   2928  H   ALA A 184     158.518 124.765 135.769  1.00  0.00         0 H  
ATOM   2929  HA  ALA A 184     157.461 126.990 134.199  1.00  0.00           H  
ATOM   2930  HB1 ALA A 184     156.235 125.214 133.043  1.00  0.00           H  
ATOM   2931  HB2 ALA A 184     157.890 124.672 133.244  1.00  0.00           H  
ATOM   2932  HB3 ALA A 184     156.615 124.038 134.282  1.00  0.00           H  
ATOM   2933  N   PHE A 185     156.134 127.023 136.696  1.00  0.00         0 N  
ATOM   2934  CA  PHE A 185     155.137 127.553 137.573  1.00  0.00         0 C  
ATOM   2935  C   PHE A 185     155.759 128.714 138.278  1.00  0.00         0 C  
ATOM   2936  O   PHE A 185     155.331 129.837 138.060  1.00  0.00         0 O  
ATOM   2937  CB  PHE A 185     154.609 126.442 138.513  1.00  0.00           C  
ATOM   2938  CG  PHE A 185     153.540 126.880 139.497  1.00  0.00           C  
ATOM   2939  CD1 PHE A 185     152.420 127.599 139.039  1.00  0.00           C  
ATOM   2940  CD2 PHE A 185     153.658 126.575 140.868  1.00  0.00           C  
ATOM   2941  CE1 PHE A 185     151.422 128.008 139.938  1.00  0.00           C  
ATOM   2942  CE2 PHE A 185     152.653 126.978 141.769  1.00  0.00           C  
ATOM   2943  CZ  PHE A 185     151.532 127.690 141.306  1.00  0.00           C  
ATOM   2944  H   PHE A 185     157.093 127.290 136.887  1.00  0.00         0 H  
ATOM   2945  HB2 PHE A 185     154.195 125.624 137.925  1.00  0.00           H  
ATOM   2946  HB3 PHE A 185     155.438 125.999 139.067  1.00  0.00           H  
ATOM   2947  HD1 PHE A 185     152.321 127.838 137.993  1.00  0.00           H  
ATOM   2948  HD2 PHE A 185     154.512 126.023 141.237  1.00  0.00           H  
ATOM   2949  HE1 PHE A 185     150.579 128.569 139.564  1.00  0.00           H  
ATOM   2950  HE2 PHE A 185     152.740 126.735 142.818  1.00  0.00           H  
ATOM   2951  HZ  PHE A 185     150.764 127.991 142.003  1.00  0.00           H  
ATOM   2952  HA  PHE A 185     154.314 127.933 136.969  1.00  0.00           H  
ATOM   2953  N   ALA A 186     156.843 128.453 139.013  1.00  0.00         0 N  
ATOM   2954  CA  ALA A 186     157.577 129.452 139.762  1.00  0.00         0 C  
ATOM   2955  C   ALA A 186     158.047 130.635 138.933  1.00  0.00         0 C  
ATOM   2956  O   ALA A 186     157.932 131.784 139.357  1.00  0.00         0 O  
ATOM   2957  CB  ALA A 186     158.759 128.771 140.468  1.00  0.00         0 C  
ATOM   2958  H   ALA A 186     157.149 127.488 139.097  1.00  0.00         0 H  
ATOM   2959  HA  ALA A 186     156.906 129.838 140.532  1.00  0.00           H  
ATOM   2960  HB1 ALA A 186     159.316 129.486 141.075  1.00  0.00           H  
ATOM   2961  HB2 ALA A 186     158.416 127.979 141.135  1.00  0.00           H  
ATOM   2962  HB3 ALA A 186     159.455 128.327 139.755  1.00  0.00           H  
ATOM   2963  N   ILE A 187     158.521 130.340 137.722  1.00  0.00         0 N  
ATOM   2964  CA  ILE A 187     158.883 131.338 136.747  1.00  0.00         0 C  
ATOM   2965  C   ILE A 187     157.767 132.262 136.332  1.00  0.00         0 C  
ATOM   2966  O   ILE A 187     157.819 133.434 136.709  1.00  0.00         0 O  
ATOM   2967  CB  ILE A 187     159.712 130.734 135.566  1.00  0.00         0 C  
ATOM   2968  CG1 ILE A 187     161.021 130.048 136.036  1.00  0.00           C  
ATOM   2969  CG2 ILE A 187     159.997 131.725 134.415  1.00  0.00           C  
ATOM   2970  CD1 ILE A 187     162.148 130.999 136.464  1.00  0.00           C  
ATOM   2971  H   ILE A 187     158.558 129.369 137.432  1.00  0.00         0 H  
ATOM   2972  HA  ILE A 187     159.582 131.994 137.269  1.00  0.00           H  
ATOM   2973  HB3 ILE A 187     159.130 129.939 135.113  1.00  0.00           H  
ATOM   2974 HG12 ILE A 187     160.818 129.363 136.859  1.00  0.00           H  
ATOM   2975 HG13 ILE A 187     161.394 129.419 135.227  1.00  0.00           H  
ATOM   2976 HG21 ILE A 187     160.654 131.278 133.668  1.00  0.00           H  
ATOM   2977 HG22 ILE A 187     159.087 132.018 133.891  1.00  0.00           H  
ATOM   2978 HG23 ILE A 187     160.475 132.636 134.777  1.00  0.00           H  
ATOM   2979 HD11 ILE A 187     163.019 130.433 136.794  1.00  0.00           H  
ATOM   2980 HD12 ILE A 187     162.475 131.634 135.641  1.00  0.00           H  
ATOM   2981 HD13 ILE A 187     161.848 131.643 137.290  1.00  0.00           H  
ATOM   2982  N   PRO A 188     156.742 131.772 135.618  1.00  0.00         0 N  
ATOM   2983  CA  PRO A 188     155.657 132.649 135.257  1.00  0.00         0 C  
ATOM   2984  C   PRO A 188     154.861 133.191 136.427  1.00  0.00         0 C  
ATOM   2985  O   PRO A 188     154.371 134.312 136.351  1.00  0.00         0 O  
ATOM   2986  CB  PRO A 188     154.769 131.829 134.303  1.00  0.00         0 C  
ATOM   2987  CG  PRO A 188     155.078 130.377 134.624  1.00  0.00           C  
ATOM   2988  CD  PRO A 188     156.520 130.409 135.124  1.00  0.00           C  
ATOM   2989  HA  PRO A 188     156.036 133.468 134.658  1.00  0.00           H  
ATOM   2990  HB1 PRO A 188     153.704 132.057 134.389  1.00  0.00           H  
ATOM   2991  HB2 PRO A 188     155.054 132.039 133.271  1.00  0.00           H  
ATOM   2992  HG2 PRO A 188     154.426 130.046 135.433  1.00  0.00           H  
ATOM   2993  HG3 PRO A 188     154.927 129.703 133.779  1.00  0.00           H  
ATOM   2994  HD2 PRO A 188     156.725 129.634 135.855  1.00  0.00           H  
ATOM   2995  HD3 PRO A 188     157.172 130.240 134.268  1.00  0.00           H  
ATOM   2996  N   ALA A 189     154.808 132.434 137.524  1.00  0.00         0 N  
ATOM   2997  CA  ALA A 189     154.248 132.881 138.766  1.00  0.00         0 C  
ATOM   2998  C   ALA A 189     154.813 134.204 139.268  1.00  0.00         0 C  
ATOM   2999  O   ALA A 189     154.080 135.175 139.466  1.00  0.00         0 O  
ATOM   3000  CB  ALA A 189     154.287 131.829 139.880  1.00  0.00         0 C  
ATOM   3001  H   ALA A 189     155.181 131.487 137.518  1.00  0.00         0 H  
ATOM   3002  HA  ALA A 189     153.190 133.069 138.565  1.00  0.00           H  
ATOM   3003  HB1 ALA A 189     153.851 132.238 140.791  1.00  0.00           H  
ATOM   3004  HB2 ALA A 189     153.695 130.950 139.624  1.00  0.00           H  
ATOM   3005  HB3 ALA A 189     155.302 131.517 140.118  1.00  0.00           H  
ATOM   3006  N   LEU A 190     156.135 134.255 139.416  1.00  0.00         0 N  
ATOM   3007  CA  LEU A 190     156.794 135.461 139.865  1.00  0.00         0 C  
ATOM   3008  C   LEU A 190     156.945 136.482 138.781  1.00  0.00         0 C  
ATOM   3009  O   LEU A 190     156.820 137.661 139.084  1.00  0.00         0 O  
ATOM   3010  CB  LEU A 190     158.182 135.108 140.459  1.00  0.00           C  
ATOM   3011  CG  LEU A 190     158.192 134.735 141.967  1.00  0.00           C  
ATOM   3012  CD1 LEU A 190     157.868 135.933 142.877  1.00  0.00           C  
ATOM   3013  CD2 LEU A 190     157.322 133.521 142.330  1.00  0.00           C  
ATOM   3014  H   LEU A 190     156.691 133.424 139.238  1.00  0.00         0 H  
ATOM   3015  HB2 LEU A 190     158.640 134.306 139.877  1.00  0.00           H  
ATOM   3016  HB3 LEU A 190     158.863 135.954 140.339  1.00  0.00           H  
ATOM   3017  HG  LEU A 190     159.218 134.448 142.196  1.00  0.00           H  
ATOM   3018 HD11 LEU A 190     158.010 135.673 143.926  1.00  0.00           H  
ATOM   3019 HD12 LEU A 190     158.517 136.782 142.662  1.00  0.00           H  
ATOM   3020 HD13 LEU A 190     156.835 136.264 142.768  1.00  0.00           H  
ATOM   3021 HD21 LEU A 190     157.447 133.252 143.380  1.00  0.00           H  
ATOM   3022 HD22 LEU A 190     156.261 133.716 142.172  1.00  0.00           H  
ATOM   3023 HD23 LEU A 190     157.593 132.645 141.744  1.00  0.00           H  
ATOM   3024  HA  LEU A 190     156.192 135.924 140.648  1.00  0.00           H  
ATOM   3025  N   ILE A 191     157.125 136.049 137.533  1.00  0.00         0 N  
ATOM   3026  CA  ILE A 191     157.052 136.918 136.378  1.00  0.00         0 C  
ATOM   3027  C   ILE A 191     155.788 137.778 136.328  1.00  0.00         0 C  
ATOM   3028  O   ILE A 191     155.841 138.967 136.015  1.00  0.00         0 O  
ATOM   3029  CB  ILE A 191     157.373 136.158 135.068  1.00  0.00         0 C  
ATOM   3030  CG1 ILE A 191     158.865 135.752 134.977  1.00  0.00           C  
ATOM   3031  CG2 ILE A 191     156.901 136.828 133.759  1.00  0.00           C  
ATOM   3032  CD1 ILE A 191     159.820 136.879 134.553  1.00  0.00           C  
ATOM   3033  H   ILE A 191     157.235 135.050 137.372  1.00  0.00         0 H  
ATOM   3034  HA  ILE A 191     157.853 137.645 136.514  1.00  0.00           H  
ATOM   3035  HB3 ILE A 191     156.799 135.250 135.138  1.00  0.00           H  
ATOM   3036 HG12 ILE A 191     159.210 135.363 135.935  1.00  0.00           H  
ATOM   3037 HG13 ILE A 191     158.966 134.926 134.273  1.00  0.00           H  
ATOM   3038 HG21 ILE A 191     157.221 136.254 132.888  1.00  0.00           H  
ATOM   3039 HG22 ILE A 191     155.814 136.895 133.705  1.00  0.00           H  
ATOM   3040 HG23 ILE A 191     157.296 137.840 133.656  1.00  0.00           H  
ATOM   3041 HD11 ILE A 191     160.854 136.534 134.577  1.00  0.00           H  
ATOM   3042 HD12 ILE A 191     159.620 137.215 133.535  1.00  0.00           H  
ATOM   3043 HD13 ILE A 191     159.748 137.745 135.211  1.00  0.00           H  
ATOM   3044  N   ILE A 192     154.668 137.189 136.724  1.00  0.00         0 N  
ATOM   3045  CA  ILE A 192     153.416 137.885 136.813  1.00  0.00         0 C  
ATOM   3046  C   ILE A 192     153.333 138.847 137.967  1.00  0.00         0 C  
ATOM   3047  O   ILE A 192     152.953 139.997 137.766  1.00  0.00         0 O  
ATOM   3048  CB  ILE A 192     152.260 136.816 136.876  1.00  0.00           C  
ATOM   3049  CG1 ILE A 192     151.856 136.178 135.511  1.00  0.00           C  
ATOM   3050  CG2 ILE A 192     150.952 137.266 137.580  1.00  0.00           C  
ATOM   3051  CD1 ILE A 192     152.824 136.287 134.320  1.00  0.00           C  
ATOM   3052  H   ILE A 192     154.672 136.190 136.907  1.00  0.00         0 H  
ATOM   3053  HB  ILE A 192     152.629 135.997 137.494  1.00  0.00           H  
ATOM   3054 HG12 ILE A 192     151.640 135.122 135.680  1.00  0.00           H  
ATOM   3055 HG13 ILE A 192     150.909 136.603 135.178  1.00  0.00           H  
ATOM   3056 HG21 ILE A 192     150.228 136.455 137.588  1.00  0.00           H  
ATOM   3057 HG22 ILE A 192     151.099 137.532 138.626  1.00  0.00           H  
ATOM   3058 HG23 ILE A 192     150.497 138.120 137.075  1.00  0.00           H  
ATOM   3059 HD11 ILE A 192     152.422 135.749 133.461  1.00  0.00           H  
ATOM   3060 HD12 ILE A 192     152.971 137.321 134.009  1.00  0.00           H  
ATOM   3061 HD13 ILE A 192     153.799 135.858 134.530  1.00  0.00           H  
ATOM   3062  HA  ILE A 192     153.276 138.489 135.915  1.00  0.00           H  
ATOM   3063  N   VAL A 193     153.686 138.386 139.165  1.00  0.00         0 N  
ATOM   3064  CA  VAL A 193     153.688 139.227 140.345  1.00  0.00         0 C  
ATOM   3065  C   VAL A 193     154.633 140.409 140.168  1.00  0.00         0 C  
ATOM   3066  O   VAL A 193     154.300 141.528 140.538  1.00  0.00         0 O  
ATOM   3067  CB  VAL A 193     154.035 138.360 141.588  1.00  0.00           C  
ATOM   3068  CG1 VAL A 193     154.230 139.182 142.877  1.00  0.00           C  
ATOM   3069  CG2 VAL A 193     152.964 137.280 141.842  1.00  0.00           C  
ATOM   3070  H   VAL A 193     153.966 137.415 139.249  1.00  0.00         0 H  
ATOM   3071  HB  VAL A 193     154.977 137.847 141.389  1.00  0.00           H  
ATOM   3072 HG11 VAL A 193     154.314 138.536 143.751  1.00  0.00           H  
ATOM   3073 HG12 VAL A 193     155.134 139.790 142.841  1.00  0.00           H  
ATOM   3074 HG13 VAL A 193     153.388 139.854 143.041  1.00  0.00           H  
ATOM   3075 HG21 VAL A 193     153.305 136.574 142.599  1.00  0.00           H  
ATOM   3076 HG22 VAL A 193     152.030 137.721 142.192  1.00  0.00           H  
ATOM   3077 HG23 VAL A 193     152.729 136.699 140.952  1.00  0.00           H  
ATOM   3078  HA  VAL A 193     152.680 139.612 140.486  1.00  0.00           H  
ATOM   3079  N   VAL A 194     155.758 140.159 139.505  1.00  0.00         0 N  
ATOM   3080  CA  VAL A 194     156.650 141.149 138.973  1.00  0.00         0 C  
ATOM   3081  C   VAL A 194     156.012 142.253 138.144  1.00  0.00         0 C  
ATOM   3082  O   VAL A 194     156.160 143.437 138.454  1.00  0.00         0 O  
ATOM   3083  CB  VAL A 194     157.898 140.479 138.322  1.00  0.00         0 C  
ATOM   3084  CG1 VAL A 194     158.704 141.360 137.345  1.00  0.00           C  
ATOM   3085  CG2 VAL A 194     158.850 139.929 139.402  1.00  0.00           C  
ATOM   3086  H   VAL A 194     155.968 139.189 139.272  1.00  0.00         0 H  
ATOM   3087  HA  VAL A 194     157.023 141.681 139.851  1.00  0.00           H  
ATOM   3088  HB3 VAL A 194     157.553 139.639 137.729  1.00  0.00           H  
ATOM   3089 HG11 VAL A 194     159.588 140.834 136.984  1.00  0.00           H  
ATOM   3090 HG12 VAL A 194     158.121 141.627 136.462  1.00  0.00           H  
ATOM   3091 HG13 VAL A 194     159.039 142.283 137.820  1.00  0.00           H  
ATOM   3092 HG21 VAL A 194     159.609 139.281 138.962  1.00  0.00           H  
ATOM   3093 HG22 VAL A 194     159.365 140.737 139.922  1.00  0.00           H  
ATOM   3094 HG23 VAL A 194     158.327 139.347 140.160  1.00  0.00           H  
ATOM   3095  N   VAL A 195     155.283 141.858 137.105  1.00  0.00         0 N  
ATOM   3096  CA  VAL A 195     154.552 142.799 136.285  1.00  0.00         0 C  
ATOM   3097  C   VAL A 195     153.447 143.500 137.070  1.00  0.00         0 C  
ATOM   3098  O   VAL A 195     153.260 144.717 136.977  1.00  0.00         0 O  
ATOM   3099  CB  VAL A 195     154.001 142.079 135.019  1.00  0.00           C  
ATOM   3100  CG1 VAL A 195     153.040 142.949 134.177  1.00  0.00           C  
ATOM   3101  CG2 VAL A 195     155.151 141.601 134.111  1.00  0.00           C  
ATOM   3102  H   VAL A 195     155.212 140.869 136.895  1.00  0.00         0 H  
ATOM   3103  HB  VAL A 195     153.444 141.197 135.340  1.00  0.00           H  
ATOM   3104 HG11 VAL A 195     152.808 142.478 133.222  1.00  0.00           H  
ATOM   3105 HG12 VAL A 195     152.090 143.119 134.685  1.00  0.00           H  
ATOM   3106 HG13 VAL A 195     153.478 143.923 133.956  1.00  0.00           H  
ATOM   3107 HG21 VAL A 195     154.780 140.970 133.303  1.00  0.00           H  
ATOM   3108 HG22 VAL A 195     155.671 142.446 133.660  1.00  0.00           H  
ATOM   3109 HG23 VAL A 195     155.900 141.025 134.650  1.00  0.00           H  
ATOM   3110  HA  VAL A 195     155.245 143.578 135.957  1.00  0.00           H  
ATOM   3111  N   ASN A 196     152.759 142.720 137.896  1.00  0.00         0 N  
ATOM   3112  CA  ASN A 196     151.707 143.202 138.754  1.00  0.00         0 C  
ATOM   3113  C   ASN A 196     152.151 144.243 139.778  1.00  0.00         0 C  
ATOM   3114  O   ASN A 196     151.396 145.142 140.159  1.00  0.00         0 O  
ATOM   3115  CB  ASN A 196     150.933 142.065 139.462  1.00  0.00           C  
ATOM   3116  CG  ASN A 196     149.995 141.259 138.556  1.00  0.00           C  
ATOM   3117  OD1 ASN A 196     149.879 141.506 137.360  1.00  0.00           O  
ATOM   3118  ND2 ASN A 196     149.280 140.291 139.114  1.00  0.00           N  
ATOM   3119  H   ASN A 196     152.938 141.715 137.874  1.00  0.00         0 H  
ATOM   3120  HB2 ASN A 196     151.624 141.398 139.967  1.00  0.00           H  
ATOM   3121  HB3 ASN A 196     150.307 142.492 140.244  1.00  0.00           H  
ATOM   3122 HD22 ASN A 196     148.651 139.779 138.520  1.00  0.00           H  
ATOM   3123 HD21 ASN A 196     149.284 140.130 140.122  1.00  0.00           H  
ATOM   3124  HA  ASN A 196     150.996 143.727 138.112  1.00  0.00           H  
ATOM   3125  N   ILE A 197     153.411 144.148 140.184  1.00  0.00         0 N  
ATOM   3126  CA  ILE A 197     154.049 145.090 141.057  1.00  0.00         0 C  
ATOM   3127  C   ILE A 197     154.261 146.454 140.441  1.00  0.00         0 C  
ATOM   3128  O   ILE A 197     153.883 147.468 141.032  1.00  0.00         0 O  
ATOM   3129  CB  ILE A 197     155.360 144.466 141.645  1.00  0.00         0 C  
ATOM   3130  CG1 ILE A 197     155.062 143.541 142.851  1.00  0.00           C  
ATOM   3131  CG2 ILE A 197     156.502 145.449 141.995  1.00  0.00           C  
ATOM   3132  CD1 ILE A 197     154.681 144.262 144.156  1.00  0.00           C  
ATOM   3133  H   ILE A 197     153.934 143.321 139.911  1.00  0.00         0 H  
ATOM   3134  HA  ILE A 197     153.364 145.264 141.888  1.00  0.00           H  
ATOM   3135  HB3 ILE A 197     155.783 143.820 140.879  1.00  0.00           H  
ATOM   3136 HG12 ILE A 197     154.265 142.847 142.598  1.00  0.00           H  
ATOM   3137 HG13 ILE A 197     155.936 142.917 143.041  1.00  0.00           H  
ATOM   3138 HG21 ILE A 197     157.331 144.928 142.477  1.00  0.00           H  
ATOM   3139 HG22 ILE A 197     156.915 145.923 141.104  1.00  0.00           H  
ATOM   3140 HG23 ILE A 197     156.170 146.238 142.670  1.00  0.00           H  
ATOM   3141 HD11 ILE A 197     154.466 143.536 144.941  1.00  0.00           H  
ATOM   3142 HD12 ILE A 197     155.490 144.896 144.519  1.00  0.00           H  
ATOM   3143 HD13 ILE A 197     153.793 144.883 144.042  1.00  0.00           H  
ATOM   3144  N   THR A 198     154.833 146.485 139.243  1.00  0.00         0 N  
ATOM   3145  CA  THR A 198     155.063 147.729 138.535  1.00  0.00         0 C  
ATOM   3146  C   THR A 198     153.775 148.471 138.209  1.00  0.00         0 C  
ATOM   3147  O   THR A 198     153.716 149.695 138.291  1.00  0.00         0 O  
ATOM   3148  CB  THR A 198     155.953 147.466 137.287  1.00  0.00         0 C  
ATOM   3149  OG1 THR A 198     155.460 146.497 136.370  1.00  0.00           O  
ATOM   3150  CG2 THR A 198     157.363 147.001 137.679  1.00  0.00           C  
ATOM   3151  H   THR A 198     155.106 145.618 138.789  1.00  0.00         0 H  
ATOM   3152  HA  THR A 198     155.624 148.391 139.196  1.00  0.00           H  
ATOM   3153  HB3 THR A 198     156.047 148.407 136.739  1.00  0.00           H  
ATOM   3154  HG1 THR A 198     154.512 146.528 136.323  1.00  0.00           H  
ATOM   3155 HG21 THR A 198     158.003 146.909 136.801  1.00  0.00           H  
ATOM   3156 HG22 THR A 198     157.839 147.709 138.357  1.00  0.00           H  
ATOM   3157 HG23 THR A 198     157.345 146.029 138.173  1.00  0.00           H  
ATOM   3158  N   ILE A 199     152.715 147.703 137.973  1.00  0.00         0 N  
ATOM   3159  CA  ILE A 199     151.368 148.196 137.848  1.00  0.00         0 C  
ATOM   3160  C   ILE A 199     150.855 148.938 139.070  1.00  0.00         0 C  
ATOM   3161  O   ILE A 199     150.214 149.979 138.947  1.00  0.00         0 O  
ATOM   3162  CB  ILE A 199     150.442 147.011 137.396  1.00  0.00         0 C  
ATOM   3163  CG1 ILE A 199     150.586 146.551 135.911  1.00  0.00           C  
ATOM   3164  CG2 ILE A 199     148.936 147.197 137.699  1.00  0.00           C  
ATOM   3165  CD1 ILE A 199     151.789 147.036 135.085  1.00  0.00           C  
ATOM   3166  H   ILE A 199     152.847 146.697 137.945  1.00  0.00         0 H  
ATOM   3167  HA  ILE A 199     151.361 148.942 137.052  1.00  0.00           H  
ATOM   3168  HB3 ILE A 199     150.737 146.152 137.993  1.00  0.00           H  
ATOM   3169 HG12 ILE A 199     150.573 145.460 135.887  1.00  0.00           H  
ATOM   3170 HG13 ILE A 199     149.693 146.842 135.361  1.00  0.00           H  
ATOM   3171 HG21 ILE A 199     148.363 146.340 137.349  1.00  0.00           H  
ATOM   3172 HG22 ILE A 199     148.733 147.280 138.767  1.00  0.00           H  
ATOM   3173 HG23 ILE A 199     148.535 148.085 137.207  1.00  0.00           H  
ATOM   3174 HD11 ILE A 199     151.724 146.654 134.065  1.00  0.00           H  
ATOM   3175 HD12 ILE A 199     151.828 148.122 135.011  1.00  0.00           H  
ATOM   3176 HD13 ILE A 199     152.737 146.690 135.488  1.00  0.00           H  
ATOM   3177  N   THR A 200     151.174 148.419 140.247  1.00  0.00         0 N  
ATOM   3178  CA  THR A 200     150.694 148.977 141.493  1.00  0.00         0 C  
ATOM   3179  C   THR A 200     151.346 150.324 141.779  1.00  0.00         0 C  
ATOM   3180  O   THR A 200     150.699 151.274 142.219  1.00  0.00         0 O  
ATOM   3181  CB  THR A 200     150.976 147.958 142.643  1.00  0.00         0 C  
ATOM   3182  OG1 THR A 200     150.361 146.698 142.397  1.00  0.00           O  
ATOM   3183  CG2 THR A 200     150.414 148.396 144.007  1.00  0.00           C  
ATOM   3184  H   THR A 200     151.748 147.588 140.280  1.00  0.00         0 H  
ATOM   3185  HA  THR A 200     149.615 149.132 141.420  1.00  0.00           H  
ATOM   3186  HB3 THR A 200     152.049 147.798 142.754  1.00  0.00           H  
ATOM   3187  HG1 THR A 200     150.730 146.291 141.617  1.00  0.00           H  
ATOM   3188 HG21 THR A 200     150.606 147.640 144.770  1.00  0.00           H  
ATOM   3189 HG22 THR A 200     150.867 149.323 144.356  1.00  0.00           H  
ATOM   3190 HG23 THR A 200     149.336 148.551 143.960  1.00  0.00           H  
ATOM   3191  N   ILE A 201     152.626 150.415 141.433  1.00  0.00         0 N  
ATOM   3192  CA  ILE A 201     153.400 151.627 141.519  1.00  0.00         0 C  
ATOM   3193  C   ILE A 201     152.888 152.691 140.564  1.00  0.00         0 C  
ATOM   3194  O   ILE A 201     152.748 153.853 140.939  1.00  0.00         0 O  
ATOM   3195  CB  ILE A 201     154.898 151.260 141.302  1.00  0.00         0 C  
ATOM   3196  CG1 ILE A 201     155.388 150.266 142.392  1.00  0.00           C  
ATOM   3197  CG2 ILE A 201     155.816 152.501 141.267  1.00  0.00           C  
ATOM   3198  CD1 ILE A 201     156.695 149.535 142.057  1.00  0.00           C  
ATOM   3199  H   ILE A 201     153.073 149.589 141.053  1.00  0.00         0 H  
ATOM   3200  HA  ILE A 201     153.295 152.026 142.530  1.00  0.00           H  
ATOM   3201  HB3 ILE A 201     154.986 150.768 140.333  1.00  0.00           H  
ATOM   3202 HG12 ILE A 201     155.499 150.792 143.342  1.00  0.00           H  
ATOM   3203 HG13 ILE A 201     154.645 149.492 142.585  1.00  0.00           H  
ATOM   3204 HG21 ILE A 201     156.863 152.227 141.142  1.00  0.00           H  
ATOM   3205 HG22 ILE A 201     155.576 153.168 140.439  1.00  0.00           H  
ATOM   3206 HG23 ILE A 201     155.735 153.079 142.189  1.00  0.00           H  
ATOM   3207 HD11 ILE A 201     156.951 148.831 142.849  1.00  0.00           H  
ATOM   3208 HD12 ILE A 201     156.608 148.963 141.135  1.00  0.00           H  
ATOM   3209 HD13 ILE A 201     157.535 150.221 141.952  1.00  0.00           H  
ATOM   3210  N   VAL A 202     152.536 152.262 139.358  1.00  0.00         0 N  
ATOM   3211  CA  VAL A 202     151.936 153.101 138.352  1.00  0.00         0 C  
ATOM   3212  C   VAL A 202     150.573 153.685 138.726  1.00  0.00         0 C  
ATOM   3213  O   VAL A 202     150.201 154.768 138.273  1.00  0.00         0 O  
ATOM   3214  CB  VAL A 202     151.936 152.316 137.006  1.00  0.00         0 C  
ATOM   3215  CG1 VAL A 202     151.040 152.911 135.909  1.00  0.00           C  
ATOM   3216  CG2 VAL A 202     153.367 152.186 136.448  1.00  0.00           C  
ATOM   3217  H   VAL A 202     152.708 151.292 139.117  1.00  0.00         0 H  
ATOM   3218  HA  VAL A 202     152.589 153.966 138.223  1.00  0.00           H  
ATOM   3219  HB3 VAL A 202     151.565 151.311 137.196  1.00  0.00           H  
ATOM   3220 HG11 VAL A 202     151.204 152.437 134.945  1.00  0.00           H  
ATOM   3221 HG12 VAL A 202     149.985 152.790 136.153  1.00  0.00           H  
ATOM   3222 HG13 VAL A 202     151.241 153.975 135.778  1.00  0.00           H  
ATOM   3223 HG21 VAL A 202     153.417 151.427 135.668  1.00  0.00           H  
ATOM   3224 HG22 VAL A 202     153.710 153.129 136.021  1.00  0.00           H  
ATOM   3225 HG23 VAL A 202     154.092 151.910 137.213  1.00  0.00           H  
ATOM   3226  N   VAL A 203     149.840 152.992 139.588  1.00  0.00         0 N  
ATOM   3227  CA  VAL A 203     148.629 153.534 140.148  1.00  0.00         0 C  
ATOM   3228  C   VAL A 203     148.912 154.580 141.203  1.00  0.00         0 C  
ATOM   3229  O   VAL A 203     148.319 155.657 141.194  1.00  0.00         0 O  
ATOM   3230  CB  VAL A 203     147.758 152.357 140.690  1.00  0.00           C  
ATOM   3231  CG1 VAL A 203     146.566 152.786 141.574  1.00  0.00           C  
ATOM   3232  CG2 VAL A 203     147.226 151.492 139.527  1.00  0.00           C  
ATOM   3233  H   VAL A 203     150.158 152.077 139.878  1.00  0.00         0 H  
ATOM   3234  HB  VAL A 203     148.384 151.717 141.310  1.00  0.00           H  
ATOM   3235 HG11 VAL A 203     145.951 151.928 141.848  1.00  0.00           H  
ATOM   3236 HG12 VAL A 203     146.890 153.247 142.508  1.00  0.00           H  
ATOM   3237 HG13 VAL A 203     145.924 153.499 141.055  1.00  0.00           H  
ATOM   3238 HG21 VAL A 203     146.725 150.597 139.895  1.00  0.00           H  
ATOM   3239 HG22 VAL A 203     146.510 152.047 138.920  1.00  0.00           H  
ATOM   3240 HG23 VAL A 203     148.019 151.165 138.857  1.00  0.00           H  
ATOM   3241  HA  VAL A 203     148.052 154.029 139.364  1.00  0.00           H  
ATOM   3242  N   ILE A 204     149.848 154.271 142.089  1.00  0.00         0 N  
ATOM   3243  CA  ILE A 204     150.292 155.150 143.143  1.00  0.00         0 C  
ATOM   3244  C   ILE A 204     150.826 156.477 142.635  1.00  0.00         0 C  
ATOM   3245  O   ILE A 204     150.505 157.521 143.202  1.00  0.00         0 O  
ATOM   3246  CB  ILE A 204     151.284 154.341 144.036  1.00  0.00         0 C  
ATOM   3247  CG1 ILE A 204     150.522 153.251 144.835  1.00  0.00           C  
ATOM   3248  CG2 ILE A 204     152.169 155.188 144.975  1.00  0.00           C  
ATOM   3249  CD1 ILE A 204     151.410 152.112 145.355  1.00  0.00           C  
ATOM   3250  H   ILE A 204     150.293 153.363 142.010  1.00  0.00         0 H  
ATOM   3251  HA  ILE A 204     149.416 155.392 143.748  1.00  0.00           H  
ATOM   3252  HB3 ILE A 204     151.976 153.830 143.370  1.00  0.00           H  
ATOM   3253 HG12 ILE A 204     149.987 153.706 145.668  1.00  0.00           H  
ATOM   3254 HG13 ILE A 204     149.751 152.799 144.211  1.00  0.00           H  
ATOM   3255 HG21 ILE A 204     152.846 154.566 145.558  1.00  0.00           H  
ATOM   3256 HG22 ILE A 204     152.803 155.878 144.420  1.00  0.00           H  
ATOM   3257 HG23 ILE A 204     151.575 155.767 145.677  1.00  0.00           H  
ATOM   3258 HD11 ILE A 204     150.802 151.329 145.808  1.00  0.00           H  
ATOM   3259 HD12 ILE A 204     151.982 151.654 144.548  1.00  0.00           H  
ATOM   3260 HD13 ILE A 204     152.111 152.454 146.115  1.00  0.00           H  
ATOM   3261  N   THR A 205     151.560 156.446 141.525  1.00  0.00         0 N  
ATOM   3262  CA  THR A 205     151.959 157.652 140.839  1.00  0.00         0 C  
ATOM   3263  C   THR A 205     150.813 158.530 140.374  1.00  0.00         0 C  
ATOM   3264  O   THR A 205     150.882 159.750 140.525  1.00  0.00         0 O  
ATOM   3265  CB  THR A 205     153.008 157.380 139.725  1.00  0.00           C  
ATOM   3266  OG1 THR A 205     152.557 156.501 138.715  1.00  0.00           O  
ATOM   3267  CG2 THR A 205     154.357 156.881 140.262  1.00  0.00           C  
ATOM   3268  H   THR A 205     151.810 155.555 141.101  1.00  0.00         0 H  
ATOM   3269  HB  THR A 205     153.199 158.331 139.224  1.00  0.00           H  
ATOM   3270  HG1 THR A 205     151.711 156.796 138.408  1.00  0.00           H  
ATOM   3271 HG21 THR A 205     155.078 156.743 139.456  1.00  0.00           H  
ATOM   3272 HG22 THR A 205     154.786 157.599 140.961  1.00  0.00           H  
ATOM   3273 HG23 THR A 205     154.269 155.934 140.789  1.00  0.00           H  
ATOM   3274  HA  THR A 205     152.479 158.255 141.588  1.00  0.00           H  
ATOM   3275  N   LYS A 206     149.742 157.912 139.883  1.00  0.00         0 N  
ATOM   3276  CA  LYS A 206     148.570 158.640 139.467  1.00  0.00         0 C  
ATOM   3277  C   LYS A 206     147.740 159.178 140.620  1.00  0.00         0 C  
ATOM   3278  O   LYS A 206     147.120 160.234 140.495  1.00  0.00         0 O  
ATOM   3279  CB  LYS A 206     147.709 157.760 138.537  1.00  0.00         0 C  
ATOM   3280  CG  LYS A 206     146.568 158.552 137.857  1.00  0.00           C  
ATOM   3281  CD  LYS A 206     146.031 157.854 136.604  1.00  0.00           C  
ATOM   3282  CE  LYS A 206     144.746 158.480 136.042  1.00  0.00           C  
ATOM   3283  NZ  LYS A 206     144.281 157.765 134.840  1.00  0.00           N1+
ATOM   3284  H   LYS A 206     149.765 156.904 139.783  1.00  0.00         0 H  
ATOM   3285  HA  LYS A 206     148.915 159.482 138.868  1.00  0.00           H  
ATOM   3286  HB2 LYS A 206     148.361 157.353 137.762  1.00  0.00           H  
ATOM   3287  HB3 LYS A 206     147.308 156.896 139.069  1.00  0.00           H  
ATOM   3288  HG2 LYS A 206     145.761 158.727 138.570  1.00  0.00           H  
ATOM   3289  HG3 LYS A 206     146.931 159.538 137.564  1.00  0.00           H  
ATOM   3290  HD2 LYS A 206     146.803 157.910 135.835  1.00  0.00           H  
ATOM   3291  HD3 LYS A 206     145.864 156.798 136.824  1.00  0.00           H  
ATOM   3292  HE2 LYS A 206     143.953 158.460 136.790  1.00  0.00           H  
ATOM   3293  HE3 LYS A 206     144.916 159.524 135.779  1.00  0.00           H  
ATOM   3294  HZ1 LYS A 206     144.086 156.797 135.059  1.00  0.00           H  
ATOM   3295  HZ2 LYS A 206     143.440 158.202 134.492  1.00  0.00           H  
ATOM   3296  HZ3 LYS A 206     144.994 157.805 134.127  1.00  0.00           H  
ATOM   3297  N   ILE A 207     147.766 158.478 141.748  1.00  0.00         0 N  
ATOM   3298  CA  ILE A 207     147.096 158.927 142.944  1.00  0.00         0 C  
ATOM   3299  C   ILE A 207     147.807 160.100 143.600  1.00  0.00         0 C  
ATOM   3300  O   ILE A 207     147.178 161.068 144.023  1.00  0.00         0 O  
ATOM   3301  CB  ILE A 207     146.898 157.726 143.927  1.00  0.00         0 C  
ATOM   3302  CG1 ILE A 207     145.848 156.708 143.405  1.00  0.00           C  
ATOM   3303  CG2 ILE A 207     146.537 158.145 145.371  1.00  0.00           C  
ATOM   3304  CD1 ILE A 207     145.767 155.385 144.187  1.00  0.00           C  
ATOM   3305  H   ILE A 207     148.250 157.585 141.750  1.00  0.00         0 H  
ATOM   3306  HA  ILE A 207     146.106 159.295 142.668  1.00  0.00           H  
ATOM   3307  HB3 ILE A 207     147.848 157.195 143.986  1.00  0.00           H  
ATOM   3308 HG12 ILE A 207     144.853 157.145 143.416  1.00  0.00           H  
ATOM   3309 HG13 ILE A 207     146.051 156.482 142.358  1.00  0.00           H  
ATOM   3310 HG21 ILE A 207     146.248 157.287 145.975  1.00  0.00           H  
ATOM   3311 HG22 ILE A 207     147.369 158.632 145.878  1.00  0.00           H  
ATOM   3312 HG23 ILE A 207     145.699 158.844 145.387  1.00  0.00           H  
ATOM   3313 HD11 ILE A 207     144.949 154.768 143.814  1.00  0.00           H  
ATOM   3314 HD12 ILE A 207     146.681 154.798 144.095  1.00  0.00           H  
ATOM   3315 HD13 ILE A 207     145.581 155.552 145.248  1.00  0.00           H  
ATOM   3316  N   LEU A 208     149.129 160.030 143.630  1.00  0.00         0 N  
ATOM   3317  CA  LEU A 208     149.969 161.048 144.208  1.00  0.00         0 C  
ATOM   3318  C   LEU A 208     150.195 162.111 143.136  1.00  0.00         0 C  
ATOM   3319  O   LEU A 208     149.608 162.024 142.056  1.00  0.00         0 O  
ATOM   3320  CB  LEU A 208     151.277 160.463 144.807  1.00  0.00         0 C  
ATOM   3321  CG  LEU A 208     151.257 159.255 145.776  1.00  0.00           C  
ATOM   3322  CD1 LEU A 208     152.610 158.553 145.852  1.00  0.00           C  
ATOM   3323  CD2 LEU A 208     150.799 159.687 147.169  1.00  0.00           C  
ATOM   3324  H   LEU A 208     149.583 159.199 143.259  1.00  0.00         0 H  
ATOM   3325  HA  LEU A 208     149.523 161.404 145.137  1.00  0.00           H  
ATOM   3326  HB2 LEU A 208     151.925 160.121 144.000  1.00  0.00           H  
ATOM   3327  HB3 LEU A 208     151.790 161.233 145.383  1.00  0.00           H  
ATOM   3328  HG  LEU A 208     150.470 158.563 145.478  1.00  0.00           H  
ATOM   3329 HD11 LEU A 208     152.546 157.713 146.544  1.00  0.00           H  
ATOM   3330 HD12 LEU A 208     152.886 158.187 144.863  1.00  0.00           H  
ATOM   3331 HD13 LEU A 208     153.366 159.255 146.204  1.00  0.00           H  
ATOM   3332 HD21 LEU A 208     150.793 158.823 147.834  1.00  0.00           H  
ATOM   3333 HD22 LEU A 208     151.484 160.440 147.560  1.00  0.00           H  
ATOM   3334 HD23 LEU A 208     149.795 160.106 147.109  1.00  0.00           H  
ATOM   3335  N   ARG A 209     151.040 163.084 143.467  1.00  0.00         0 N  
ATOM   3336  CA  ARG A 209     151.373 164.180 142.566  1.00  0.00         0 C  
ATOM   3337  C   ARG A 209     152.003 163.612 141.283  1.00  0.00         0 C  
ATOM   3338  O   ARG A 209     152.575 162.522 141.277  1.00  0.00         0 O  
ATOM   3339  CB  ARG A 209     152.248 165.231 143.290  1.00  0.00           C  
ATOM   3340  CG  ARG A 209     151.624 166.112 144.396  1.00  0.00           C  
ATOM   3341  CD  ARG A 209     150.445 167.019 144.042  1.00  0.00           C  
ATOM   3342  NE  ARG A 209     149.175 166.288 143.996  1.00  0.00           N  
ATOM   3343  CZ  ARG A 209     148.445 165.951 145.075  1.00  0.00           C  
ATOM   3344  NH1 ARG A 209     148.867 166.286 146.314  1.00  0.00           N  
ATOM   3345  NH2 ARG A 209     147.298 165.268 144.887  1.00  0.00           N1+
ATOM   3346  H   ARG A 209     151.482 163.082 144.375  1.00  0.00         0 H  
ATOM   3347  HB2 ARG A 209     152.633 165.946 142.564  1.00  0.00           H  
ATOM   3348  HB3 ARG A 209     153.081 164.732 143.785  1.00  0.00           H  
ATOM   3349  HG2 ARG A 209     152.380 166.789 144.792  1.00  0.00           H  
ATOM   3350  HG3 ARG A 209     151.249 165.477 145.199  1.00  0.00           H  
ATOM   3351  HD2 ARG A 209     150.612 167.467 143.062  1.00  0.00           H  
ATOM   3352  HD3 ARG A 209     150.354 167.806 144.790  1.00  0.00           H  
ATOM   3353  HE  ARG A 209     148.855 166.035 143.071  1.00  0.00           H  
ATOM   3354 HH12 ARG A 209     148.315 166.030 147.121  1.00  0.00           H  
ATOM   3355 HH11 ARG A 209     149.733 166.790 146.434  1.00  0.00           H  
ATOM   3356 HH22 ARG A 209     146.732 165.003 145.680  1.00  0.00           H  
ATOM   3357 HH21 ARG A 209     147.005 165.022 143.952  1.00  0.00           H  
ATOM   3358  HA  ARG A 209     150.491 164.800 142.406  1.00  0.00           H  
ATOM   3359  N   PRO A 210     151.896 164.360 140.183  1.00  0.00         0 N  
ATOM   3360  CA  PRO A 210     151.223 165.643 140.192  1.00  0.00         0 C  
ATOM   3361  C   PRO A 210     149.745 165.461 139.875  1.00  0.00         0 C  
ATOM   3362  O   PRO A 210     148.960 166.396 140.012  1.00  0.00         0 O  
ATOM   3363  CB  PRO A 210     151.934 166.457 139.110  1.00  0.00         0 C  
ATOM   3364  CG  PRO A 210     152.401 165.415 138.092  1.00  0.00           C  
ATOM   3365  CD  PRO A 210     152.883 164.239 138.942  1.00  0.00           C  
ATOM   3366  HA  PRO A 210     151.324 166.100 141.176  1.00  0.00           H  
ATOM   3367  HB1 PRO A 210     151.252 167.176 138.658  1.00  0.00           H  
ATOM   3368  HB2 PRO A 210     152.777 167.005 139.532  1.00  0.00           H  
ATOM   3369  HG2 PRO A 210     151.580 165.122 137.438  1.00  0.00           H  
ATOM   3370  HG3 PRO A 210     153.204 165.814 137.473  1.00  0.00           H  
ATOM   3371  HD2 PRO A 210     152.742 163.298 138.412  1.00  0.00           H  
ATOM   3372  HD3 PRO A 210     153.943 164.343 139.177  1.00  0.00           H  
ATOM   3373  N   SER A 211     149.393 164.249 139.455  1.00  0.00         0 N  
ATOM   3374  CA  SER A 211     148.038 163.864 139.100  1.00  0.00         0 C  
ATOM   3375  C   SER A 211     147.122 163.918 140.334  1.00  0.00         0 C  
ATOM   3376  O   SER A 211     147.564 163.709 141.462  1.00  0.00         0 O  
ATOM   3377  CB  SER A 211     148.131 162.465 138.478  1.00  0.00           C  
ATOM   3378  OG  SER A 211     146.825 162.012 138.100  1.00  0.00           O  
ATOM   3379  H   SER A 211     150.089 163.524 139.364  1.00  0.00         0 H  
ATOM   3380  HB2 SER A 211     148.768 162.501 137.595  1.00  0.00           H  
ATOM   3381  HB3 SER A 211     148.555 161.771 139.204  1.00  0.00           H  
ATOM   3382  HG  SER A 211     146.425 161.540 138.833  1.00  0.00           H  
ATOM   3383  HA  SER A 211     147.674 164.509 138.301  1.00  0.00           H  
ATOM   3384  N   ILE A 212     145.848 164.203 140.083  1.00  0.00         0 N  
ATOM   3385  CA  ILE A 212     144.835 164.296 141.134  1.00  0.00         0 C  
ATOM   3386  C   ILE A 212     143.741 163.253 140.855  1.00  0.00         0 C  
ATOM   3387  O   ILE A 212     142.805 163.497 140.094  1.00  0.00         0 O  
ATOM   3388  CB  ILE A 212     144.301 165.748 141.293  1.00  0.00         0 C  
ATOM   3389  CG1 ILE A 212     145.460 166.760 141.413  1.00  0.00           C  
ATOM   3390  CG2 ILE A 212     143.337 165.856 142.487  1.00  0.00           C  
ATOM   3391  CD1 ILE A 212     145.110 168.248 141.576  1.00  0.00           C  
ATOM   3392  H   ILE A 212     145.544 164.365 139.133  1.00  0.00         0 H  
ATOM   3393  HA  ILE A 212     145.315 164.217 142.110  1.00  0.00           H  
ATOM   3394  HB3 ILE A 212     143.632 165.982 140.465  1.00  0.00           H  
ATOM   3395 HG12 ILE A 212     146.077 166.714 140.516  1.00  0.00           H  
ATOM   3396 HG13 ILE A 212     146.067 166.517 142.285  1.00  0.00           H  
ATOM   3397 HG21 ILE A 212     142.979 166.881 142.575  1.00  0.00           H  
ATOM   3398 HG22 ILE A 212     142.490 165.188 142.332  1.00  0.00           H  
ATOM   3399 HG23 ILE A 212     143.858 165.574 143.402  1.00  0.00           H  
ATOM   3400 HD11 ILE A 212     146.027 168.832 141.647  1.00  0.00           H  
ATOM   3401 HD12 ILE A 212     144.532 168.582 140.715  1.00  0.00           H  
ATOM   3402 HD13 ILE A 212     144.521 168.385 142.483  1.00  0.00           H  
ATOM   3403  N   GLY A 213     143.886 162.092 141.489  1.00  0.00         0 N  
ATOM   3404  CA  GLY A 213     142.949 160.987 141.347  1.00  0.00         0 C  
ATOM   3405  C   GLY A 213     142.137 160.758 142.622  1.00  0.00         0 C  
ATOM   3406  O   GLY A 213     141.180 159.988 142.604  1.00  0.00         0 O  
ATOM   3407  H   GLY A 213     144.676 161.947 142.102  1.00  0.00         0 H  
ATOM   3408  HA3 GLY A 213     143.497 160.072 141.123  1.00  0.00           H  
ATOM   3409  HA2 GLY A 213     142.254 161.202 140.535  1.00  0.00           H  
ATOM   3410  N   ASP A 214     142.549 161.437 143.688  1.00  0.00         0 N  
ATOM   3411  CA  ASP A 214     141.930 161.374 145.002  1.00  0.00         0 C  
ATOM   3412  C   ASP A 214     141.018 162.595 145.198  1.00  0.00         0 C  
ATOM   3413  O   ASP A 214     141.202 163.648 144.586  1.00  0.00         0 O  
ATOM   3414  CB  ASP A 214     143.035 161.237 146.066  1.00  0.00         0 C  
ATOM   3415  CG  ASP A 214     143.756 162.529 146.458  1.00  0.00           C  
ATOM   3416  OD1 ASP A 214     143.175 163.284 147.272  1.00  0.00           O1-
ATOM   3417  OD2 ASP A 214     144.853 162.756 145.907  1.00  0.00           O  
ATOM   3418  H   ASP A 214     143.348 162.052 143.618  1.00  0.00         0 H  
ATOM   3419  HA  ASP A 214     141.415 160.420 145.116  1.00  0.00           H  
ATOM   3420  HB2 ASP A 214     143.808 160.559 145.703  1.00  0.00           H  
ATOM   3421  HB3 ASP A 214     142.607 160.839 146.986  1.00  0.00           H  
ATOM   3422  N   LYS A 215     140.021 162.451 146.065  1.00  0.00         0 N  
ATOM   3423  CA  LYS A 215     139.071 163.512 146.362  1.00  0.00         0 C  
ATOM   3424  C   LYS A 215     139.466 164.196 147.678  1.00  0.00         0 C  
ATOM   3425  O   LYS A 215     140.125 163.602 148.531  1.00  0.00         0 O  
ATOM   3426  CB  LYS A 215     137.661 162.917 146.391  1.00  0.00         0 C  
ATOM   3427  CG  LYS A 215     137.486 161.821 147.446  1.00  0.00           C  
ATOM   3428  CD  LYS A 215     136.082 161.206 147.498  1.00  0.00           C  
ATOM   3429  CE  LYS A 215     135.888 160.105 148.549  1.00  0.00           C  
ATOM   3430  NZ  LYS A 215     134.523 159.549 148.557  1.00  0.00           N1+
ATOM   3431  H   LYS A 215     139.898 161.574 146.552  1.00  0.00         0 H  
ATOM   3432  HA  LYS A 215     139.027 164.206 145.523  1.00  0.00           H  
ATOM   3433  HB2 LYS A 215     137.431 162.477 145.420  1.00  0.00           H  
ATOM   3434  HB3 LYS A 215     136.939 163.703 146.612  1.00  0.00           H  
ATOM   3435  HG2 LYS A 215     137.689 162.232 148.435  1.00  0.00           H  
ATOM   3436  HG3 LYS A 215     138.182 161.006 147.243  1.00  0.00           H  
ATOM   3437  HD2 LYS A 215     135.353 161.983 147.725  1.00  0.00           H  
ATOM   3438  HD3 LYS A 215     135.846 160.757 146.533  1.00  0.00           H  
ATOM   3439  HE2 LYS A 215     136.577 159.285 148.349  1.00  0.00           H  
ATOM   3440  HE3 LYS A 215     136.085 160.511 149.542  1.00  0.00           H  
ATOM   3441  HZ1 LYS A 215     133.861 160.285 148.757  1.00  0.00           H  
ATOM   3442  HZ2 LYS A 215     134.318 159.149 147.653  1.00  0.00           H  
ATOM   3443  HZ3 LYS A 215     134.455 158.833 149.265  1.00  0.00           H  
ATOM   3444  N   PRO A 216     139.059 165.457 147.841  1.00  0.00         0 N  
ATOM   3445  CA  PRO A 216     139.465 166.177 149.028  1.00  0.00         0 C  
ATOM   3446  C   PRO A 216     138.520 165.719 150.043  1.00  0.00         0 C  
ATOM   3447  O   PRO A 216     137.438 165.263 149.678  1.00  0.00         0 O  
ATOM   3448  CB  PRO A 216     139.351 167.687 148.818  1.00  0.00         0 C  
ATOM   3449  CG  PRO A 216     139.846 167.912 147.389  1.00  0.00           C  
ATOM   3450  CD  PRO A 216     139.485 166.623 146.651  1.00  0.00           C  
ATOM   3451  HA  PRO A 216     140.488 165.924 149.307  1.00  0.00           H  
ATOM   3452  HB1 PRO A 216     138.319 168.016 148.937  1.00  0.00           H  
ATOM   3453  HB2 PRO A 216     139.966 168.224 149.540  1.00  0.00           H  
ATOM   3454  HG2 PRO A 216     139.354 168.776 146.942  1.00  0.00           H  
ATOM   3455  HG3 PRO A 216     140.921 168.089 147.377  1.00  0.00           H  
ATOM   3456  HD2 PRO A 216     139.290 166.823 145.597  1.00  0.00           H  
ATOM   3457  HD3 PRO A 216     140.299 165.901 146.716  1.00  0.00           H  
ATOM   3458  N   CYS A 217     138.877 165.884 151.313  1.00  0.00         0 N  
ATOM   3459  CA  CYS A 217     138.003 165.533 152.433  1.00  0.00         0 C  
ATOM   3460  C   CYS A 217     138.108 166.596 153.537  1.00  0.00         0 C  
ATOM   3461  O   CYS A 217     137.768 166.352 154.693  1.00  0.00         0 O  
ATOM   3462  CB  CYS A 217     138.324 164.114 152.937  1.00  0.00         0 C  
ATOM   3463  SG  CYS A 217     136.969 163.375 153.895  1.00  0.00           S  
ATOM   3464  H   CYS A 217     139.784 166.265 151.537  1.00  0.00         0 H  
ATOM   3465  HA  CYS A 217     136.985 165.389 152.069  1.00  0.00           H  
ATOM   3466  HB2 CYS A 217     138.520 163.462 152.086  1.00  0.00           H  
ATOM   3467  HB3 CYS A 217     139.204 164.147 153.580  1.00  0.00           H  
ATOM   3468  HG  CYS A 217     136.945 164.314 154.851  1.00  0.00           H  
ATOM   3469  N   LYS A 218     138.585 167.782 153.168  1.00  0.00         0 N  
ATOM   3470  CA  LYS A 218     138.746 168.892 154.094  1.00  0.00         0 C  
ATOM   3471  C   LYS A 218     139.889 168.581 155.069  1.00  0.00         0 C  
ATOM   3472  O   LYS A 218     140.150 169.338 156.005  1.00  0.00         0 O  
ATOM   3473  CB  LYS A 218     137.408 169.147 154.794  1.00  0.00         0 C  
ATOM   3474  CG  LYS A 218     137.201 170.612 155.192  1.00  0.00           C  
ATOM   3475  CD  LYS A 218     135.868 170.896 155.896  1.00  0.00           C  
ATOM   3476  CE  LYS A 218     135.740 172.295 156.515  1.00  0.00           C  
ATOM   3477  NZ  LYS A 218     134.443 172.516 157.177  1.00  0.00           N1+
ATOM   3478  H   LYS A 218     138.852 167.941 152.207  1.00  0.00         0 H  
ATOM   3479  HA  LYS A 218     138.908 169.813 153.533  1.00  0.00           H  
ATOM   3480  HB2 LYS A 218     137.354 168.549 155.704  1.00  0.00           H  
ATOM   3481  HB3 LYS A 218     136.590 168.870 154.129  1.00  0.00           H  
ATOM   3482  HG2 LYS A 218     137.992 170.918 155.876  1.00  0.00           H  
ATOM   3483  HG3 LYS A 218     137.229 171.238 154.301  1.00  0.00           H  
ATOM   3484  HD2 LYS A 218     135.051 170.798 155.181  1.00  0.00           H  
ATOM   3485  HD3 LYS A 218     135.726 170.184 156.709  1.00  0.00           H  
ATOM   3486  HE2 LYS A 218     136.521 172.435 157.262  1.00  0.00           H  
ATOM   3487  HE3 LYS A 218     135.846 173.049 155.735  1.00  0.00           H  
ATOM   3488  HZ1 LYS A 218     133.698 172.410 156.504  1.00  0.00           H  
ATOM   3489  HZ2 LYS A 218     134.324 171.841 157.919  1.00  0.00           H  
ATOM   3490  HZ3 LYS A 218     134.417 173.449 157.564  1.00  0.00           H  
ATOM   3491  N   GLN A 219     140.555 167.456 154.826  1.00  0.00         0 N  
ATOM   3492  CA  GLN A 219     141.669 167.007 155.650  1.00  0.00         0 C  
ATOM   3493  C   GLN A 219     142.988 167.369 154.951  1.00  0.00         0 C  
ATOM   3494  O   GLN A 219     142.998 167.865 153.824  1.00  0.00         0 O  
ATOM   3495  CB  GLN A 219     141.544 165.508 155.995  1.00  0.00         0 C  
ATOM   3496  CG  GLN A 219     141.223 165.130 157.451  1.00  0.00           C  
ATOM   3497  CD  GLN A 219     142.415 165.159 158.396  1.00  0.00           C  
ATOM   3498  OE1 GLN A 219     143.429 165.791 158.121  1.00  0.00           O  
ATOM   3499  NE2 GLN A 219     142.310 164.464 159.525  1.00  0.00           N  
ATOM   3500  H   GLN A 219     140.295 166.875 154.042  1.00  0.00         0 H  
ATOM   3501  HA  GLN A 219     141.563 167.412 156.656  1.00  0.00           H  
ATOM   3502  HB2 GLN A 219     142.484 165.003 155.771  1.00  0.00           H  
ATOM   3503  HB3 GLN A 219     140.744 165.064 155.404  1.00  0.00           H  
ATOM   3504  HG2 GLN A 219     140.486 165.825 157.854  1.00  0.00           H  
ATOM   3505  HG3 GLN A 219     140.822 164.117 157.484  1.00  0.00           H  
ATOM   3506 HE21 GLN A 219     143.076 164.453 160.184  1.00  0.00           H  
ATOM   3507 HE22 GLN A 219     141.465 163.948 159.724  1.00  0.00           H  
ATOM   3508  N   GLU A 220     144.092 167.107 155.645  1.00  0.00         0 N  
ATOM   3509  CA  GLU A 220     145.429 167.378 155.155  1.00  0.00         0 C  
ATOM   3510  C   GLU A 220     145.967 166.156 154.396  1.00  0.00         0 C  
ATOM   3511  O   GLU A 220     146.459 166.264 153.273  1.00  0.00         0 O  
ATOM   3512  CB  GLU A 220     146.355 167.796 156.309  1.00  0.00         0 C  
ATOM   3513  CG  GLU A 220     145.840 168.906 157.240  1.00  0.00           C  
ATOM   3514  CD  GLU A 220     145.538 170.250 156.585  1.00  0.00           C  
ATOM   3515  OE1 GLU A 220     146.326 170.660 155.702  1.00  0.00           O1-
ATOM   3516  OE2 GLU A 220     144.514 170.846 156.978  1.00  0.00           O  
ATOM   3517  H   GLU A 220     144.024 166.698 156.566  1.00  0.00         0 H  
ATOM   3518  HA  GLU A 220     145.417 168.281 154.545  1.00  0.00           H  
ATOM   3519  HB2 GLU A 220     146.546 166.937 156.952  1.00  0.00           H  
ATOM   3520  HB3 GLU A 220     147.297 168.164 155.905  1.00  0.00           H  
ATOM   3521  HG2 GLU A 220     144.910 168.585 157.709  1.00  0.00           H  
ATOM   3522  HG3 GLU A 220     146.584 169.109 158.010  1.00  0.00           H  
ATOM   3523  N   LYS A 221     145.869 164.986 155.021  1.00  0.00         0 N  
ATOM   3524  CA  LYS A 221     146.332 163.737 154.437  1.00  0.00         0 C  
ATOM   3525  C   LYS A 221     145.140 162.925 153.974  1.00  0.00         0 C  
ATOM   3526  O   LYS A 221     145.141 161.702 154.069  1.00  0.00         0 O  
ATOM   3527  CB  LYS A 221     147.198 163.004 155.466  1.00  0.00           C  
ATOM   3528  CG  LYS A 221     146.450 162.670 156.760  1.00  0.00           C  
ATOM   3529  CD  LYS A 221     147.343 162.157 157.896  1.00  0.00           C  
ATOM   3530  CE  LYS A 221     146.661 162.045 159.266  1.00  0.00           C  
ATOM   3531  NZ  LYS A 221     147.563 161.548 160.320  1.00  0.00           N1+
ATOM   3532  H   LYS A 221     145.458 164.939 155.942  1.00  0.00         0 H  
ATOM   3533  HB2 LYS A 221     148.052 163.626 155.732  1.00  0.00           H  
ATOM   3534  HB3 LYS A 221     147.552 162.065 155.040  1.00  0.00           H  
ATOM   3535  HG2 LYS A 221     145.948 163.564 157.131  1.00  0.00           H  
ATOM   3536  HG3 LYS A 221     145.710 161.894 156.563  1.00  0.00           H  
ATOM   3537  HD2 LYS A 221     147.709 161.160 157.650  1.00  0.00           H  
ATOM   3538  HD3 LYS A 221     148.190 162.831 158.026  1.00  0.00           H  
ATOM   3539  HE2 LYS A 221     146.302 163.026 159.575  1.00  0.00           H  
ATOM   3540  HE3 LYS A 221     145.820 161.355 159.198  1.00  0.00           H  
ATOM   3541  HZ1 LYS A 221     147.061 161.495 161.195  1.00  0.00           H  
ATOM   3542  HZ2 LYS A 221     147.900 160.629 160.070  1.00  0.00           H  
ATOM   3543  HZ3 LYS A 221     148.346 162.178 160.419  1.00  0.00           H  
ATOM   3544  HA  LYS A 221     147.036 163.950 153.632  1.00  0.00           H  
ATOM   3545  N   SER A 222     144.149 163.602 153.394  1.00  0.00         0 N  
ATOM   3546  CA  SER A 222     142.922 163.002 152.961  1.00  0.00         0 C  
ATOM   3547  C   SER A 222     143.116 161.974 151.846  1.00  0.00         0 C  
ATOM   3548  O   SER A 222     142.339 161.027 151.713  1.00  0.00         0 O  
ATOM   3549  CB  SER A 222     141.980 164.115 152.546  1.00  0.00         0 C  
ATOM   3550  OG  SER A 222     142.497 164.896 151.497  1.00  0.00           O  
ATOM   3551  H   SER A 222     144.232 164.610 153.360  1.00  0.00         0 H  
ATOM   3552  HA  SER A 222     142.490 162.488 153.820  1.00  0.00           H  
ATOM   3553  HB2 SER A 222     141.085 163.626 152.182  1.00  0.00           H  
ATOM   3554  HB3 SER A 222     141.716 164.748 153.395  1.00  0.00           H  
ATOM   3555  HG  SER A 222     142.501 164.375 150.702  1.00  0.00           H  
ATOM   3556  N   SER A 223     144.198 162.156 151.091  1.00  0.00         0 N  
ATOM   3557  CA  SER A 223     144.617 161.276 150.046  1.00  0.00         0 C  
ATOM   3558  C   SER A 223     145.279 160.002 150.543  1.00  0.00         0 C  
ATOM   3559  O   SER A 223     145.217 158.958 149.890  1.00  0.00         0 O  
ATOM   3560  CB  SER A 223     145.590 162.073 149.156  1.00  0.00           C  
ATOM   3561  OG  SER A 223     146.700 162.506 149.902  1.00  0.00           O  
ATOM   3562  H   SER A 223     144.776 162.955 151.300  1.00  0.00         0 H  
ATOM   3563  HB2 SER A 223     145.970 161.447 148.346  1.00  0.00           H  
ATOM   3564  HB3 SER A 223     145.101 162.932 148.693  1.00  0.00           H  
ATOM   3565  HG  SER A 223     147.284 162.994 149.334  1.00  0.00           H  
ATOM   3566  HA  SER A 223     143.745 161.003 149.449  1.00  0.00           H  
ATOM   3567  N   LEU A 224     145.854 160.065 151.742  1.00  0.00         0 N  
ATOM   3568  CA  LEU A 224     146.567 158.951 152.312  1.00  0.00         0 C  
ATOM   3569  C   LEU A 224     145.633 157.802 152.682  1.00  0.00         0 C  
ATOM   3570  O   LEU A 224     145.990 156.626 152.611  1.00  0.00         0 O  
ATOM   3571  CB  LEU A 224     147.323 159.432 153.572  1.00  0.00         0 C  
ATOM   3572  CG  LEU A 224     148.338 158.445 154.193  1.00  0.00           C  
ATOM   3573  CD1 LEU A 224     149.463 158.053 153.221  1.00  0.00           C  
ATOM   3574  CD2 LEU A 224     148.922 159.039 155.483  1.00  0.00           C  
ATOM   3575  H   LEU A 224     145.724 160.886 152.320  1.00  0.00         0 H  
ATOM   3576  HA  LEU A 224     147.289 158.606 151.573  1.00  0.00           H  
ATOM   3577  HB2 LEU A 224     147.839 160.365 153.342  1.00  0.00           H  
ATOM   3578  HB3 LEU A 224     146.600 159.673 154.351  1.00  0.00           H  
ATOM   3579  HG  LEU A 224     147.815 157.532 154.481  1.00  0.00           H  
ATOM   3580 HD11 LEU A 224     150.201 157.418 153.713  1.00  0.00           H  
ATOM   3581 HD12 LEU A 224     149.084 157.487 152.371  1.00  0.00           H  
ATOM   3582 HD13 LEU A 224     149.985 158.929 152.837  1.00  0.00           H  
ATOM   3583 HD21 LEU A 224     149.600 158.337 155.971  1.00  0.00           H  
ATOM   3584 HD22 LEU A 224     149.481 159.954 155.284  1.00  0.00           H  
ATOM   3585 HD23 LEU A 224     148.136 159.281 156.200  1.00  0.00           H  
ATOM   3586  N   PHE A 225     144.400 158.156 153.020  1.00  0.00         0 N  
ATOM   3587  CA  PHE A 225     143.366 157.203 153.333  1.00  0.00         0 C  
ATOM   3588  C   PHE A 225     142.825 156.526 152.092  1.00  0.00         0 C  
ATOM   3589  O   PHE A 225     142.537 155.331 152.120  1.00  0.00         0 O  
ATOM   3590  CB  PHE A 225     142.233 157.950 154.064  1.00  0.00         0 C  
ATOM   3591  CG  PHE A 225     142.670 158.615 155.363  1.00  0.00           C  
ATOM   3592  CD1 PHE A 225     143.394 157.891 156.337  1.00  0.00           C  
ATOM   3593  CD2 PHE A 225     142.389 159.980 155.583  1.00  0.00           C  
ATOM   3594  CE1 PHE A 225     143.859 158.532 157.500  1.00  0.00           C  
ATOM   3595  CE2 PHE A 225     142.850 160.620 156.750  1.00  0.00           C  
ATOM   3596  CZ  PHE A 225     143.591 159.899 157.705  1.00  0.00           C  
ATOM   3597  H   PHE A 225     144.195 159.141 153.123  1.00  0.00         0 H  
ATOM   3598  HA  PHE A 225     143.770 156.429 153.989  1.00  0.00           H  
ATOM   3599  HB2 PHE A 225     141.799 158.706 153.406  1.00  0.00           H  
ATOM   3600  HB3 PHE A 225     141.424 157.255 154.294  1.00  0.00           H  
ATOM   3601  HD1 PHE A 225     143.618 156.843 156.196  1.00  0.00           H  
ATOM   3602  HD2 PHE A 225     141.827 160.544 154.853  1.00  0.00           H  
ATOM   3603  HE1 PHE A 225     144.425 157.976 158.234  1.00  0.00           H  
ATOM   3604  HE2 PHE A 225     142.641 161.668 156.910  1.00  0.00           H  
ATOM   3605  HZ  PHE A 225     143.949 160.391 158.598  1.00  0.00           H  
ATOM   3606  N   GLN A 226     142.787 157.267 150.984  1.00  0.00         0 N  
ATOM   3607  CA  GLN A 226     142.382 156.732 149.706  1.00  0.00         0 C  
ATOM   3608  C   GLN A 226     143.429 155.771 149.177  1.00  0.00         0 C  
ATOM   3609  O   GLN A 226     143.091 154.674 148.732  1.00  0.00         0 O  
ATOM   3610  CB  GLN A 226     142.174 157.870 148.677  1.00  0.00         0 C  
ATOM   3611  CG  GLN A 226     141.286 159.047 149.135  1.00  0.00           C  
ATOM   3612  CD  GLN A 226     140.055 158.647 149.948  1.00  0.00           C  
ATOM   3613  OE1 GLN A 226     139.295 157.771 149.550  1.00  0.00           O  
ATOM   3614  NE2 GLN A 226     139.863 159.265 151.106  1.00  0.00           N  
ATOM   3615  H   GLN A 226     143.132 158.215 151.023  1.00  0.00         0 H  
ATOM   3616  HA  GLN A 226     141.453 156.171 149.830  1.00  0.00           H  
ATOM   3617  HB2 GLN A 226     143.131 158.276 148.348  1.00  0.00           H  
ATOM   3618  HB3 GLN A 226     141.723 157.436 147.783  1.00  0.00           H  
ATOM   3619  HG2 GLN A 226     141.893 159.730 149.720  1.00  0.00           H  
ATOM   3620  HG3 GLN A 226     140.954 159.617 148.266  1.00  0.00           H  
ATOM   3621 HE21 GLN A 226     139.058 159.027 151.666  1.00  0.00           H  
ATOM   3622 HE22 GLN A 226     140.527 159.957 151.428  1.00  0.00           H  
ATOM   3623  N   ILE A 227     144.705 156.162 149.281  1.00  0.00         0 N  
ATOM   3624  CA  ILE A 227     145.784 155.323 148.816  1.00  0.00         0 C  
ATOM   3625  C   ILE A 227     145.941 154.044 149.618  1.00  0.00         0 C  
ATOM   3626  O   ILE A 227     146.138 152.973 149.047  1.00  0.00         0 O  
ATOM   3627  CB  ILE A 227     147.106 156.121 148.611  1.00  0.00         0 C  
ATOM   3628  CG1 ILE A 227     147.949 155.480 147.484  1.00  0.00           C  
ATOM   3629  CG2 ILE A 227     147.971 156.305 149.869  1.00  0.00           C  
ATOM   3630  CD1 ILE A 227     149.266 156.210 147.223  1.00  0.00           C  
ATOM   3631  H   ILE A 227     144.916 157.100 149.615  1.00  0.00         0 H  
ATOM   3632  HA  ILE A 227     145.469 155.000 147.821  1.00  0.00           H  
ATOM   3633  HB3 ILE A 227     146.826 157.118 148.266  1.00  0.00           H  
ATOM   3634 HG12 ILE A 227     148.146 154.431 147.704  1.00  0.00           H  
ATOM   3635 HG13 ILE A 227     147.384 155.480 146.552  1.00  0.00           H  
ATOM   3636 HG21 ILE A 227     148.766 157.033 149.709  1.00  0.00           H  
ATOM   3637 HG22 ILE A 227     147.375 156.670 150.692  1.00  0.00           H  
ATOM   3638 HG23 ILE A 227     148.438 155.372 150.188  1.00  0.00           H  
ATOM   3639 HD11 ILE A 227     149.686 155.916 146.265  1.00  0.00           H  
ATOM   3640 HD12 ILE A 227     149.111 157.287 147.193  1.00  0.00           H  
ATOM   3641 HD13 ILE A 227     150.007 156.000 147.995  1.00  0.00           H  
ATOM   3642  N   SER A 228     145.730 154.147 150.927  1.00  0.00         0 N  
ATOM   3643  CA  SER A 228     145.742 153.004 151.811  1.00  0.00         0 C  
ATOM   3644  C   SER A 228     144.639 152.006 151.486  1.00  0.00         0 C  
ATOM   3645  O   SER A 228     144.868 150.795 151.460  1.00  0.00         0 O  
ATOM   3646  CB  SER A 228     145.594 153.476 153.279  1.00  0.00         0 C  
ATOM   3647  OG  SER A 228     146.721 154.210 153.739  1.00  0.00           O  
ATOM   3648  H   SER A 228     145.592 155.067 151.328  1.00  0.00         0 H  
ATOM   3649  HA  SER A 228     146.698 152.486 151.702  1.00  0.00           H  
ATOM   3650  HB2 SER A 228     144.692 154.074 153.413  1.00  0.00           H  
ATOM   3651  HB3 SER A 228     145.486 152.607 153.932  1.00  0.00           H  
ATOM   3652  HG  SER A 228     146.675 155.083 153.348  1.00  0.00           H  
ATOM   3653  N   LYS A 229     143.456 152.540 151.172  1.00  0.00         0 N  
ATOM   3654  CA  LYS A 229     142.317 151.738 150.805  1.00  0.00         0 C  
ATOM   3655  C   LYS A 229     142.498 151.051 149.465  1.00  0.00         0 C  
ATOM   3656  O   LYS A 229     142.216 149.865 149.339  1.00  0.00         0 O  
ATOM   3657  CB  LYS A 229     141.034 152.603 150.836  1.00  0.00         0 C  
ATOM   3658  CG  LYS A 229     139.761 151.802 151.173  1.00  0.00           C  
ATOM   3659  CD  LYS A 229     138.519 152.699 151.317  1.00  0.00           C  
ATOM   3660  CE  LYS A 229     137.332 151.992 151.995  1.00  0.00           C  
ATOM   3661  NZ  LYS A 229     136.135 152.849 152.008  1.00  0.00           N1+
ATOM   3662  H   LYS A 229     143.340 153.546 151.201  1.00  0.00         0 H  
ATOM   3663  HA  LYS A 229     142.220 150.958 151.564  1.00  0.00           H  
ATOM   3664  HB2 LYS A 229     141.136 153.353 151.618  1.00  0.00           H  
ATOM   3665  HB3 LYS A 229     140.909 153.157 149.904  1.00  0.00           H  
ATOM   3666  HG2 LYS A 229     139.586 151.036 150.415  1.00  0.00           H  
ATOM   3667  HG3 LYS A 229     139.924 151.269 152.112  1.00  0.00           H  
ATOM   3668  HD2 LYS A 229     138.773 153.582 151.905  1.00  0.00           H  
ATOM   3669  HD3 LYS A 229     138.226 153.064 150.332  1.00  0.00           H  
ATOM   3670  HE2 LYS A 229     137.085 151.060 151.490  1.00  0.00           H  
ATOM   3671  HE3 LYS A 229     137.585 151.735 153.024  1.00  0.00           H  
ATOM   3672  HZ1 LYS A 229     136.333 153.704 152.506  1.00  0.00           H  
ATOM   3673  HZ2 LYS A 229     135.865 153.067 151.060  1.00  0.00           H  
ATOM   3674  HZ3 LYS A 229     135.377 152.364 152.465  1.00  0.00           H  
ATOM   3675  N   SER A 230     143.060 151.778 148.505  1.00  0.00         0 N  
ATOM   3676  CA  SER A 230     143.355 151.281 147.191  1.00  0.00         0 C  
ATOM   3677  C   SER A 230     144.358 150.128 147.186  1.00  0.00         0 C  
ATOM   3678  O   SER A 230     144.197 149.122 146.490  1.00  0.00         0 O  
ATOM   3679  CB  SER A 230     143.888 152.484 146.384  1.00  0.00           C  
ATOM   3680  OG  SER A 230     143.962 152.190 145.011  1.00  0.00           O  
ATOM   3681  H   SER A 230     143.252 152.756 148.697  1.00  0.00         0 H  
ATOM   3682  HB2 SER A 230     143.223 153.341 146.492  1.00  0.00           H  
ATOM   3683  HB3 SER A 230     144.872 152.795 146.734  1.00  0.00           H  
ATOM   3684  HG  SER A 230     144.240 152.969 144.548  1.00  0.00           H  
ATOM   3685  HA  SER A 230     142.420 150.991 146.720  1.00  0.00           H  
ATOM   3686  N   ILE A 231     145.377 150.253 148.032  1.00  0.00         0 N  
ATOM   3687  CA  ILE A 231     146.406 149.252 148.152  1.00  0.00         0 C  
ATOM   3688  C   ILE A 231     145.914 147.987 148.819  1.00  0.00         0 C  
ATOM   3689  O   ILE A 231     146.245 146.893 148.363  1.00  0.00         0 O  
ATOM   3690  CB  ILE A 231     147.644 149.891 148.859  1.00  0.00         0 C  
ATOM   3691  CG1 ILE A 231     148.308 150.944 147.931  1.00  0.00           C  
ATOM   3692  CG2 ILE A 231     148.706 148.862 149.315  1.00  0.00           C  
ATOM   3693  CD1 ILE A 231     149.282 151.898 148.640  1.00  0.00           C  
ATOM   3694  H   ILE A 231     145.476 151.112 148.564  1.00  0.00         0 H  
ATOM   3695  HA  ILE A 231     146.722 148.964 147.146  1.00  0.00           H  
ATOM   3696  HB3 ILE A 231     147.287 150.402 149.756  1.00  0.00           H  
ATOM   3697 HG12 ILE A 231     148.827 150.437 147.116  1.00  0.00           H  
ATOM   3698 HG13 ILE A 231     147.550 151.556 147.443  1.00  0.00           H  
ATOM   3699 HG21 ILE A 231     149.565 149.345 149.778  1.00  0.00           H  
ATOM   3700 HG22 ILE A 231     148.317 148.171 150.063  1.00  0.00           H  
ATOM   3701 HG23 ILE A 231     149.073 148.271 148.475  1.00  0.00           H  
ATOM   3702 HD11 ILE A 231     149.659 152.649 147.945  1.00  0.00           H  
ATOM   3703 HD12 ILE A 231     148.795 152.424 149.461  1.00  0.00           H  
ATOM   3704 HD13 ILE A 231     150.150 151.376 149.041  1.00  0.00           H  
ATOM   3705  N   GLY A 232     145.057 148.126 149.827  1.00  0.00         0 N  
ATOM   3706  CA  GLY A 232     144.404 146.990 150.437  1.00  0.00         0 C  
ATOM   3707  C   GLY A 232     143.474 146.234 149.510  1.00  0.00         0 C  
ATOM   3708  O   GLY A 232     143.257 145.041 149.720  1.00  0.00         0 O  
ATOM   3709  H   GLY A 232     144.819 149.057 150.151  1.00  0.00         0 H  
ATOM   3710  HA3 GLY A 232     143.823 147.342 151.289  1.00  0.00           H  
ATOM   3711  HA2 GLY A 232     145.154 146.303 150.833  1.00  0.00           H  
ATOM   3712  N   VAL A 233     142.983 146.912 148.468  1.00  0.00         0 N  
ATOM   3713  CA  VAL A 233     142.019 146.325 147.571  1.00  0.00         0 C  
ATOM   3714  C   VAL A 233     142.650 145.702 146.346  1.00  0.00         0 C  
ATOM   3715  O   VAL A 233     142.233 144.622 145.931  1.00  0.00         0 O  
ATOM   3716  CB  VAL A 233     140.805 147.237 147.310  1.00  0.00           C  
ATOM   3717  CG1 VAL A 233     140.169 147.666 148.649  1.00  0.00           C  
ATOM   3718  CG2 VAL A 233     141.087 148.435 146.412  1.00  0.00           C  
ATOM   3719  H   VAL A 233     143.177 147.900 148.377  1.00  0.00         0 H  
ATOM   3720  HB  VAL A 233     140.058 146.641 146.780  1.00  0.00           H  
ATOM   3721 HG11 VAL A 233     139.686 148.634 148.566  1.00  0.00           H  
ATOM   3722 HG12 VAL A 233     139.434 146.933 148.970  1.00  0.00           H  
ATOM   3723 HG13 VAL A 233     140.871 147.761 149.473  1.00  0.00           H  
ATOM   3724 HG21 VAL A 233     140.187 149.014 146.220  1.00  0.00           H  
ATOM   3725 HG22 VAL A 233     141.773 149.076 146.933  1.00  0.00           H  
ATOM   3726 HG23 VAL A 233     141.517 148.158 145.451  1.00  0.00           H  
ATOM   3727  HA  VAL A 233     141.560 145.470 148.074  1.00  0.00           H  
ATOM   3728  N   LEU A 234     143.725 146.298 145.833  1.00  0.00         0 N  
ATOM   3729  CA  LEU A 234     144.435 145.702 144.721  1.00  0.00         0 C  
ATOM   3730  C   LEU A 234     145.484 144.708 145.124  1.00  0.00         0 C  
ATOM   3731  O   LEU A 234     145.846 143.875 144.306  1.00  0.00         0 O  
ATOM   3732  CB  LEU A 234     144.974 146.806 143.791  1.00  0.00         0 C  
ATOM   3733  CG  LEU A 234     143.847 147.403 142.908  1.00  0.00           C  
ATOM   3734  CD1 LEU A 234     144.252 148.759 142.315  1.00  0.00           C  
ATOM   3735  CD2 LEU A 234     143.394 146.443 141.787  1.00  0.00           C  
ATOM   3736  H   LEU A 234     143.996 147.217 146.175  1.00  0.00         0 H  
ATOM   3737  HA  LEU A 234     143.744 145.106 144.128  1.00  0.00           H  
ATOM   3738  HB2 LEU A 234     145.445 147.588 144.388  1.00  0.00           H  
ATOM   3739  HB3 LEU A 234     145.758 146.416 143.141  1.00  0.00           H  
ATOM   3740  HG  LEU A 234     142.981 147.594 143.544  1.00  0.00           H  
ATOM   3741 HD11 LEU A 234     143.435 149.187 141.731  1.00  0.00           H  
ATOM   3742 HD12 LEU A 234     144.491 149.476 143.102  1.00  0.00           H  
ATOM   3743 HD13 LEU A 234     145.119 148.671 141.661  1.00  0.00           H  
ATOM   3744 HD21 LEU A 234     142.605 146.897 141.187  1.00  0.00           H  
ATOM   3745 HD22 LEU A 234     144.217 146.192 141.118  1.00  0.00           H  
ATOM   3746 HD23 LEU A 234     142.983 145.509 142.167  1.00  0.00           H  
ATOM   3747  N   THR A 235     145.905 144.701 146.383  1.00  0.00         0 N  
ATOM   3748  CA  THR A 235     146.793 143.676 146.885  1.00  0.00         0 C  
ATOM   3749  C   THR A 235     146.421 142.228 146.608  1.00  0.00         0 C  
ATOM   3750  O   THR A 235     147.207 141.519 145.970  1.00  0.00         0 O  
ATOM   3751  CB  THR A 235     147.204 143.929 148.372  1.00  0.00           C  
ATOM   3752  OG1 THR A 235     148.128 144.999 148.442  1.00  0.00           O  
ATOM   3753  CG2 THR A 235     147.930 142.763 149.075  1.00  0.00           C  
ATOM   3754  H   THR A 235     145.591 145.429 147.015  1.00  0.00         0 H  
ATOM   3755  HB  THR A 235     146.333 144.207 148.967  1.00  0.00           H  
ATOM   3756  HG1 THR A 235     147.621 145.804 148.322  1.00  0.00           H  
ATOM   3757 HG21 THR A 235     148.266 143.054 150.071  1.00  0.00           H  
ATOM   3758 HG22 THR A 235     147.281 141.896 149.210  1.00  0.00           H  
ATOM   3759 HG23 THR A 235     148.807 142.442 148.512  1.00  0.00           H  
ATOM   3760  HA  THR A 235     147.709 143.811 146.306  1.00  0.00           H  
ATOM   3761  N   PRO A 236     145.251 141.772 147.081  1.00  0.00         0 N  
ATOM   3762  CA  PRO A 236     144.905 140.392 146.865  1.00  0.00         0 C  
ATOM   3763  C   PRO A 236     144.340 140.098 145.493  1.00  0.00         0 C  
ATOM   3764  O   PRO A 236     144.533 139.000 144.984  1.00  0.00         0 O  
ATOM   3765  CB  PRO A 236     143.855 140.105 147.950  1.00  0.00         0 C  
ATOM   3766  CG  PRO A 236     143.139 141.432 148.154  1.00  0.00           C  
ATOM   3767  CD  PRO A 236     144.255 142.452 147.922  1.00  0.00           C  
ATOM   3768  HA  PRO A 236     145.761 139.732 147.027  1.00  0.00           H  
ATOM   3769  HB1 PRO A 236     143.186 139.291 147.692  1.00  0.00           H  
ATOM   3770  HB2 PRO A 236     144.360 139.817 148.874  1.00  0.00           H  
ATOM   3771  HG2 PRO A 236     142.353 141.556 147.407  1.00  0.00           H  
ATOM   3772  HG3 PRO A 236     142.673 141.529 149.135  1.00  0.00           H  
ATOM   3773  HD2 PRO A 236     143.867 143.363 147.473  1.00  0.00           H  
ATOM   3774  HD3 PRO A 236     144.695 142.712 148.884  1.00  0.00           H  
ATOM   3775  N   LEU A 237     143.704 141.095 144.876  1.00  0.00         0 N  
ATOM   3776  CA  LEU A 237     143.234 140.976 143.516  1.00  0.00         0 C  
ATOM   3777  C   LEU A 237     144.367 140.917 142.500  1.00  0.00         0 C  
ATOM   3778  O   LEU A 237     144.200 140.345 141.424  1.00  0.00         0 O  
ATOM   3779  CB  LEU A 237     142.332 142.181 143.164  1.00  0.00           C  
ATOM   3780  CG  LEU A 237     141.032 142.309 143.989  1.00  0.00           C  
ATOM   3781  CD1 LEU A 237     140.266 143.577 143.577  1.00  0.00           C  
ATOM   3782  CD2 LEU A 237     140.128 141.074 143.857  1.00  0.00           C  
ATOM   3783  H   LEU A 237     143.553 141.969 145.358  1.00  0.00         0 H  
ATOM   3784  HB2 LEU A 237     142.911 143.100 143.263  1.00  0.00           H  
ATOM   3785  HB3 LEU A 237     142.062 142.123 142.107  1.00  0.00           H  
ATOM   3786  HG  LEU A 237     141.293 142.412 145.042  1.00  0.00           H  
ATOM   3787 HD11 LEU A 237     139.383 143.724 144.201  1.00  0.00           H  
ATOM   3788 HD12 LEU A 237     140.885 144.468 143.683  1.00  0.00           H  
ATOM   3789 HD13 LEU A 237     139.940 143.528 142.538  1.00  0.00           H  
ATOM   3790 HD21 LEU A 237     139.171 141.226 144.359  1.00  0.00           H  
ATOM   3791 HD22 LEU A 237     139.928 140.841 142.814  1.00  0.00           H  
ATOM   3792 HD23 LEU A 237     140.585 140.194 144.301  1.00  0.00           H  
ATOM   3793  HA  LEU A 237     142.669 140.048 143.409  1.00  0.00           H  
ATOM   3794  N   LEU A 238     145.515 141.491 142.863  1.00  0.00         0 N  
ATOM   3795  CA  LEU A 238     146.717 141.379 142.085  1.00  0.00         0 C  
ATOM   3796  C   LEU A 238     147.688 140.305 142.544  1.00  0.00         0 C  
ATOM   3797  O   LEU A 238     148.684 140.043 141.862  1.00  0.00         0 O  
ATOM   3798  CB  LEU A 238     147.484 142.723 142.014  1.00  0.00           C  
ATOM   3799  CG  LEU A 238     146.773 143.888 141.283  1.00  0.00           C  
ATOM   3800  CD1 LEU A 238     147.632 145.158 141.384  1.00  0.00           C  
ATOM   3801  CD2 LEU A 238     146.460 143.580 139.808  1.00  0.00           C  
ATOM   3802  H   LEU A 238     145.554 142.068 143.696  1.00  0.00         0 H  
ATOM   3803  HB2 LEU A 238     147.768 143.031 143.019  1.00  0.00           H  
ATOM   3804  HB3 LEU A 238     148.432 142.565 141.503  1.00  0.00           H  
ATOM   3805  HG  LEU A 238     145.825 144.089 141.780  1.00  0.00           H  
ATOM   3806 HD11 LEU A 238     147.126 146.023 140.953  1.00  0.00           H  
ATOM   3807 HD12 LEU A 238     147.858 145.399 142.424  1.00  0.00           H  
ATOM   3808 HD13 LEU A 238     148.584 145.038 140.866  1.00  0.00           H  
ATOM   3809 HD21 LEU A 238     146.020 144.448 139.315  1.00  0.00           H  
ATOM   3810 HD22 LEU A 238     147.360 143.306 139.255  1.00  0.00           H  
ATOM   3811 HD23 LEU A 238     145.745 142.764 139.707  1.00  0.00           H  
ATOM   3812  HA  LEU A 238     146.478 141.098 141.058  1.00  0.00           H  
ATOM   3813  N   GLY A 239     147.395 139.668 143.669  1.00  0.00         0 N  
ATOM   3814  CA  GLY A 239     148.124 138.515 144.127  1.00  0.00         0 C  
ATOM   3815  C   GLY A 239     149.537 138.769 144.604  1.00  0.00         0 C  
ATOM   3816  O   GLY A 239     150.408 137.907 144.498  1.00  0.00         0 O  
ATOM   3817  H   GLY A 239     146.520 139.886 144.125  1.00  0.00         0 H  
ATOM   3818  HA3 GLY A 239     148.174 137.773 143.332  1.00  0.00           H  
ATOM   3819  HA2 GLY A 239     147.563 138.051 144.939  1.00  0.00           H  
ATOM   3820  N   LEU A 240     149.787 139.966 145.123  1.00  0.00         0 N  
ATOM   3821  CA  LEU A 240     151.138 140.398 145.438  1.00  0.00         0 C  
ATOM   3822  C   LEU A 240     151.757 139.672 146.625  1.00  0.00         0 C  
ATOM   3823  O   LEU A 240     152.977 139.593 146.770  1.00  0.00         0 O  
ATOM   3824  CB  LEU A 240     151.119 141.920 145.723  1.00  0.00           C  
ATOM   3825  CG  LEU A 240     150.437 142.806 144.649  1.00  0.00           C  
ATOM   3826  CD1 LEU A 240     150.453 144.282 145.073  1.00  0.00           C  
ATOM   3827  CD2 LEU A 240     151.057 142.650 143.251  1.00  0.00           C  
ATOM   3828  H   LEU A 240     149.020 140.626 145.183  1.00  0.00         0 H  
ATOM   3829  HB2 LEU A 240     150.620 142.095 146.678  1.00  0.00           H  
ATOM   3830  HB3 LEU A 240     152.146 142.262 145.864  1.00  0.00           H  
ATOM   3831  HG  LEU A 240     149.389 142.517 144.581  1.00  0.00           H  
ATOM   3832 HD11 LEU A 240     149.883 144.898 144.377  1.00  0.00           H  
ATOM   3833 HD12 LEU A 240     150.014 144.420 146.062  1.00  0.00           H  
ATOM   3834 HD13 LEU A 240     151.469 144.677 145.107  1.00  0.00           H  
ATOM   3835 HD21 LEU A 240     150.597 143.340 142.543  1.00  0.00           H  
ATOM   3836 HD22 LEU A 240     152.123 142.865 143.268  1.00  0.00           H  
ATOM   3837 HD23 LEU A 240     150.921 141.643 142.856  1.00  0.00           H  
ATOM   3838  HA  LEU A 240     151.773 140.210 144.573  1.00  0.00           H  
ATOM   3839  N   THR A 241     150.882 139.067 147.416  1.00  0.00         0 N  
ATOM   3840  CA  THR A 241     151.153 138.106 148.454  1.00  0.00         0 C  
ATOM   3841  C   THR A 241     152.025 136.932 148.050  1.00  0.00         0 C  
ATOM   3842  O   THR A 241     152.879 136.484 148.813  1.00  0.00         0 O  
ATOM   3843  CB  THR A 241     149.797 137.655 149.075  1.00  0.00           C  
ATOM   3844  OG1 THR A 241     148.909 137.130 148.094  1.00  0.00           O  
ATOM   3845  CG2 THR A 241     149.052 138.786 149.801  1.00  0.00           C  
ATOM   3846  H   THR A 241     149.912 139.119 147.137  1.00  0.00         0 H  
ATOM   3847  HB  THR A 241     150.000 136.862 149.799  1.00  0.00           H  
ATOM   3848  HG1 THR A 241     148.237 136.624 148.532  1.00  0.00           H  
ATOM   3849 HG21 THR A 241     148.149 138.418 150.289  1.00  0.00           H  
ATOM   3850 HG22 THR A 241     149.679 139.233 150.574  1.00  0.00           H  
ATOM   3851 HG23 THR A 241     148.756 139.582 149.117  1.00  0.00           H  
ATOM   3852  HA  THR A 241     151.716 138.632 149.228  1.00  0.00           H  
ATOM   3853  N   TRP A 242     151.856 136.484 146.807  1.00  0.00         0 N  
ATOM   3854  CA  TRP A 242     152.642 135.408 146.252  1.00  0.00         0 C  
ATOM   3855  C   TRP A 242     154.113 135.726 146.039  1.00  0.00         0 C  
ATOM   3856  O   TRP A 242     154.922 134.834 145.787  1.00  0.00         0 O  
ATOM   3857  CB  TRP A 242     152.029 134.950 144.906  1.00  0.00           C  
ATOM   3858  CG  TRP A 242     150.706 134.243 144.977  1.00  0.00           C  
ATOM   3859  CD1 TRP A 242     149.504 134.785 144.685  1.00  0.00           C  
ATOM   3860  CD2 TRP A 242     150.426 132.858 145.353  1.00  0.00           C  
ATOM   3861  NE1 TRP A 242     148.505 133.860 144.885  1.00  0.00           N  
ATOM   3862  CE2 TRP A 242     149.017 132.633 145.247  1.00  0.00           C  
ATOM   3863  CE3 TRP A 242     151.218 131.771 145.792  1.00  0.00           C  
ATOM   3864  CZ2 TRP A 242     148.433 131.384 145.518  1.00  0.00           C  
ATOM   3865  CZ3 TRP A 242     150.641 130.521 146.091  1.00  0.00           C  
ATOM   3866  CH2 TRP A 242     149.254 130.325 145.941  1.00  0.00           C  
ATOM   3867  H   TRP A 242     151.182 136.948 146.204  1.00  0.00         0 H  
ATOM   3868  HB2 TRP A 242     151.923 135.806 144.242  1.00  0.00           H  
ATOM   3869  HB3 TRP A 242     152.707 134.266 144.393  1.00  0.00           H  
ATOM   3870  HD1 TRP A 242     149.343 135.797 144.356  1.00  0.00           H  
ATOM   3871  HE1 TRP A 242     147.520 134.127 144.780  1.00  0.00           H  
ATOM   3872  HE3 TRP A 242     152.283 131.908 145.905  1.00  0.00           H  
ATOM   3873  HZ2 TRP A 242     147.370 131.229 145.405  1.00  0.00           H  
ATOM   3874  HZ3 TRP A 242     151.265 129.708 146.434  1.00  0.00           H  
ATOM   3875  HH2 TRP A 242     148.814 129.362 146.155  1.00  0.00           H  
ATOM   3876  HA  TRP A 242     152.600 134.566 146.945  1.00  0.00           H  
ATOM   3877  N   GLY A 243     154.471 136.996 146.192  1.00  0.00         0 N  
ATOM   3878  CA  GLY A 243     155.812 137.469 146.019  1.00  0.00         0 C  
ATOM   3879  C   GLY A 243     156.834 136.983 147.019  1.00  0.00         0 C  
ATOM   3880  O   GLY A 243     158.019 136.886 146.699  1.00  0.00         0 O  
ATOM   3881  H   GLY A 243     153.761 137.678 146.437  1.00  0.00         0 H  
ATOM   3882  HA3 GLY A 243     155.793 138.558 146.064  1.00  0.00           H  
ATOM   3883  HA2 GLY A 243     156.154 137.214 145.015  1.00  0.00           H  
ATOM   3884  N   PHE A 244     156.360 136.559 148.191  1.00  0.00         0 N  
ATOM   3885  CA  PHE A 244     157.191 135.893 149.175  1.00  0.00         0 C  
ATOM   3886  C   PHE A 244     157.639 134.496 148.764  1.00  0.00         0 C  
ATOM   3887  O   PHE A 244     158.492 133.885 149.408  1.00  0.00         0 O  
ATOM   3888  CB  PHE A 244     156.441 135.805 150.524  1.00  0.00           C  
ATOM   3889  CG  PHE A 244     156.048 137.151 151.108  1.00  0.00           C  
ATOM   3890  CD1 PHE A 244     157.035 138.128 151.359  1.00  0.00           C  
ATOM   3891  CD2 PHE A 244     154.693 137.442 151.373  1.00  0.00           C  
ATOM   3892  CE1 PHE A 244     156.667 139.398 151.843  1.00  0.00           C  
ATOM   3893  CE2 PHE A 244     154.328 138.713 151.857  1.00  0.00           C  
ATOM   3894  CZ  PHE A 244     155.313 139.692 152.088  1.00  0.00           C  
ATOM   3895  H   PHE A 244     155.370 136.657 148.384  1.00  0.00         0 H  
ATOM   3896  HB2 PHE A 244     155.552 135.186 150.417  1.00  0.00           H  
ATOM   3897  HB3 PHE A 244     157.065 135.301 151.264  1.00  0.00           H  
ATOM   3898  HD1 PHE A 244     158.078 137.921 151.163  1.00  0.00           H  
ATOM   3899  HD2 PHE A 244     153.925 136.703 151.191  1.00  0.00           H  
ATOM   3900  HE1 PHE A 244     157.424 140.150 152.015  1.00  0.00           H  
ATOM   3901  HE2 PHE A 244     153.290 138.945 152.040  1.00  0.00           H  
ATOM   3902  HZ  PHE A 244     155.030 140.670 152.450  1.00  0.00           H  
ATOM   3903  HA  PHE A 244     158.102 136.478 149.316  1.00  0.00           H  
ATOM   3904  N   GLY A 245     157.117 134.023 147.638  1.00  0.00         0 N  
ATOM   3905  CA  GLY A 245     157.470 132.772 147.046  1.00  0.00         0 C  
ATOM   3906  C   GLY A 245     158.877 132.665 146.500  1.00  0.00         0 C  
ATOM   3907  O   GLY A 245     159.428 131.572 146.401  1.00  0.00         0 O  
ATOM   3908  H   GLY A 245     156.421 134.576 147.149  1.00  0.00         0 H  
ATOM   3909  HA3 GLY A 245     156.786 132.601 146.215  1.00  0.00           H  
ATOM   3910  HA2 GLY A 245     157.265 131.974 147.758  1.00  0.00           H  
ATOM   3911  N   LEU A 246     159.512 133.802 146.222  1.00  0.00         0 N  
ATOM   3912  CA  LEU A 246     160.909 133.801 145.834  1.00  0.00         0 C  
ATOM   3913  C   LEU A 246     161.823 133.597 147.043  1.00  0.00         0 C  
ATOM   3914  O   LEU A 246     162.925 133.056 146.966  1.00  0.00         0 O  
ATOM   3915  CB  LEU A 246     161.212 135.168 145.183  1.00  0.00         0 C  
ATOM   3916  CG  LEU A 246     162.502 135.213 144.335  1.00  0.00           C  
ATOM   3917  CD1 LEU A 246     162.375 134.415 143.026  1.00  0.00           C  
ATOM   3918  CD2 LEU A 246     162.882 136.667 144.023  1.00  0.00           C  
ATOM   3919  H   LEU A 246     159.023 134.682 146.334  1.00  0.00         0 H  
ATOM   3920  HA  LEU A 246     161.031 133.023 145.089  1.00  0.00           H  
ATOM   3921  HB2 LEU A 246     160.380 135.463 144.541  1.00  0.00           H  
ATOM   3922  HB3 LEU A 246     161.256 135.935 145.960  1.00  0.00           H  
ATOM   3923  HG  LEU A 246     163.320 134.780 144.911  1.00  0.00           H  
ATOM   3924 HD11 LEU A 246     163.307 134.448 142.460  1.00  0.00           H  
ATOM   3925 HD12 LEU A 246     162.151 133.363 143.198  1.00  0.00           H  
ATOM   3926 HD13 LEU A 246     161.591 134.821 142.387  1.00  0.00           H  
ATOM   3927 HD21 LEU A 246     163.794 136.718 143.426  1.00  0.00           H  
ATOM   3928 HD22 LEU A 246     162.095 137.173 143.463  1.00  0.00           H  
ATOM   3929 HD23 LEU A 246     163.057 137.236 144.936  1.00  0.00           H  
ATOM   3930  N   THR A 247     161.325 133.995 148.200  1.00  0.00         0 N  
ATOM   3931  CA  THR A 247     162.047 133.976 149.443  1.00  0.00         0 C  
ATOM   3932  C   THR A 247     161.824 132.649 150.185  1.00  0.00         0 C  
ATOM   3933  O   THR A 247     162.373 132.457 151.266  1.00  0.00         0 O  
ATOM   3934  CB  THR A 247     161.475 135.137 150.328  1.00  0.00         0 C  
ATOM   3935  OG1 THR A 247     161.242 136.327 149.578  1.00  0.00           O  
ATOM   3936  CG2 THR A 247     162.397 135.560 151.483  1.00  0.00           C  
ATOM   3937  H   THR A 247     160.407 134.423 148.230  1.00  0.00         0 H  
ATOM   3938  HA  THR A 247     163.116 134.126 149.277  1.00  0.00           H  
ATOM   3939  HB3 THR A 247     160.513 134.840 150.752  1.00  0.00           H  
ATOM   3940  HG1 THR A 247     162.071 136.640 149.243  1.00  0.00           H  
ATOM   3941 HG21 THR A 247     161.972 136.400 152.033  1.00  0.00           H  
ATOM   3942 HG22 THR A 247     162.542 134.760 152.208  1.00  0.00           H  
ATOM   3943 HG23 THR A 247     163.382 135.861 151.126  1.00  0.00           H  
ATOM   3944  N   THR A 248     161.090 131.705 149.591  1.00  0.00         0 N  
ATOM   3945  CA  THR A 248     161.214 130.315 149.947  1.00  0.00         0 C  
ATOM   3946  C   THR A 248     162.120 129.583 148.973  1.00  0.00         0 C  
ATOM   3947  O   THR A 248     162.658 128.540 149.337  1.00  0.00         0 O  
ATOM   3948  CB  THR A 248     159.790 129.696 150.084  1.00  0.00           C  
ATOM   3949  OG1 THR A 248     159.849 128.406 150.638  1.00  0.00           O  
ATOM   3950  CG2 THR A 248     158.957 129.569 148.807  1.00  0.00           C  
ATOM   3951  H   THR A 248     160.577 131.939 148.754  1.00  0.00         0 H  
ATOM   3952  HB  THR A 248     159.227 130.302 150.798  1.00  0.00           H  
ATOM   3953  HG1 THR A 248     159.263 128.379 151.387  1.00  0.00           H  
ATOM   3954 HG21 THR A 248     158.015 129.050 148.990  1.00  0.00           H  
ATOM   3955 HG22 THR A 248     158.700 130.558 148.460  1.00  0.00           H  
ATOM   3956 HG23 THR A 248     159.479 129.041 148.009  1.00  0.00           H  
ATOM   3957  HA  THR A 248     161.682 130.202 150.927  1.00  0.00           H  
ATOM   3958  N   VAL A 249     162.378 130.139 147.781  1.00  0.00         0 N  
ATOM   3959  CA  VAL A 249     163.309 129.472 146.906  1.00  0.00         0 C  
ATOM   3960  C   VAL A 249     164.764 129.784 147.170  1.00  0.00         0 C  
ATOM   3961  O   VAL A 249     165.612 128.912 146.987  1.00  0.00         0 O  
ATOM   3962  CB  VAL A 249     162.997 129.610 145.387  1.00  0.00           C  
ATOM   3963  CG1 VAL A 249     161.597 129.088 145.043  1.00  0.00           C  
ATOM   3964  CG2 VAL A 249     163.279 130.957 144.710  1.00  0.00           C  
ATOM   3965  H   VAL A 249     161.940 130.994 147.475  1.00  0.00         0 H  
ATOM   3966  HB  VAL A 249     163.684 128.919 144.893  1.00  0.00           H  
ATOM   3967 HG11 VAL A 249     161.396 129.142 143.973  1.00  0.00           H  
ATOM   3968 HG12 VAL A 249     161.522 128.041 145.332  1.00  0.00           H  
ATOM   3969 HG13 VAL A 249     160.809 129.631 145.559  1.00  0.00           H  
ATOM   3970 HG21 VAL A 249     163.225 130.863 143.625  1.00  0.00           H  
ATOM   3971 HG22 VAL A 249     162.534 131.675 144.995  1.00  0.00           H  
ATOM   3972 HG23 VAL A 249     164.261 131.367 144.947  1.00  0.00           H  
ATOM   3973  HA  VAL A 249     163.229 128.392 147.060  1.00  0.00           H  
ATOM   3974  N   PHE A 250     165.052 131.010 147.600  1.00  0.00         0 N  
ATOM   3975  CA  PHE A 250     166.390 131.381 148.005  1.00  0.00         0 C  
ATOM   3976  C   PHE A 250     166.917 130.555 149.167  1.00  0.00         0 C  
ATOM   3977  O   PHE A 250     167.874 129.804 148.971  1.00  0.00         0 O  
ATOM   3978  CB  PHE A 250     166.487 132.910 148.232  1.00  0.00         0 C  
ATOM   3979  CG  PHE A 250     166.750 133.747 146.995  1.00  0.00           C  
ATOM   3980  CD1 PHE A 250     167.969 133.607 146.298  1.00  0.00           C  
ATOM   3981  CD2 PHE A 250     165.811 134.711 146.573  1.00  0.00           C  
ATOM   3982  CE1 PHE A 250     168.247 134.425 145.186  1.00  0.00           C  
ATOM   3983  CE2 PHE A 250     166.096 135.536 145.469  1.00  0.00           C  
ATOM   3984  CZ  PHE A 250     167.311 135.392 144.773  1.00  0.00           C  
ATOM   3985  H   PHE A 250     164.315 131.706 147.590  1.00  0.00         0 H  
ATOM   3986  HA  PHE A 250     167.048 131.142 147.167  1.00  0.00           H  
ATOM   3987  HB2 PHE A 250     165.580 133.289 148.701  1.00  0.00           H  
ATOM   3988  HB3 PHE A 250     167.303 133.133 148.923  1.00  0.00           H  
ATOM   3989  HD1 PHE A 250     168.704 132.883 146.620  1.00  0.00           H  
ATOM   3990  HD2 PHE A 250     164.877 134.840 147.102  1.00  0.00           H  
ATOM   3991  HE1 PHE A 250     169.184 134.320 144.659  1.00  0.00           H  
ATOM   3992  HE2 PHE A 250     165.387 136.289 145.160  1.00  0.00           H  
ATOM   3993  HZ  PHE A 250     167.530 136.030 143.928  1.00  0.00           H  
ATOM   3994  N   PRO A 251     166.296 130.642 150.352  1.00  0.00         0 N  
ATOM   3995  CA  PRO A 251     166.630 129.725 151.403  1.00  0.00         0 C  
ATOM   3996  C   PRO A 251     165.927 128.376 151.342  1.00  0.00         0 C  
ATOM   3997  O   PRO A 251     166.550 127.338 151.136  1.00  0.00         0 O  
ATOM   3998  CB  PRO A 251     166.249 130.482 152.696  1.00  0.00         0 C  
ATOM   3999  CG  PRO A 251     165.090 131.384 152.296  1.00  0.00           C  
ATOM   4000  CD  PRO A 251     165.395 131.696 150.830  1.00  0.00           C  
ATOM   4001  HA  PRO A 251     167.705 129.531 151.439  1.00  0.00           H  
ATOM   4002  HB1 PRO A 251     166.011 129.834 153.541  1.00  0.00           H  
ATOM   4003  HB2 PRO A 251     167.092 131.097 153.012  1.00  0.00           H  
ATOM   4004  HG2 PRO A 251     164.135 130.870 152.395  1.00  0.00           H  
ATOM   4005  HG3 PRO A 251     165.030 132.284 152.910  1.00  0.00           H  
ATOM   4006  HD2 PRO A 251     164.501 131.747 150.215  1.00  0.00           H  
ATOM   4007  HD3 PRO A 251     165.904 132.658 150.800  1.00  0.00           H  
ATOM   4008  N   GLY A 252     164.634 128.400 151.643  1.00  0.00         0 N  
ATOM   4009  CA  GLY A 252     163.812 127.233 151.846  1.00  0.00         0 C  
ATOM   4010  C   GLY A 252     163.775 126.695 153.258  1.00  0.00         0 C  
ATOM   4011  O   GLY A 252     162.913 125.891 153.602  1.00  0.00         0 O  
ATOM   4012  H   GLY A 252     164.195 129.302 151.748  1.00  0.00         0 H  
ATOM   4013  HA3 GLY A 252     164.110 126.429 151.170  1.00  0.00           H  
ATOM   4014  HA2 GLY A 252     162.786 127.478 151.575  1.00  0.00           H  
ATOM   4015  N   THR A 253     164.682 127.171 154.093  1.00  0.00         0 N  
ATOM   4016  CA  THR A 253     164.901 126.673 155.431  1.00  0.00         0 C  
ATOM   4017  C   THR A 253     164.188 127.485 156.512  1.00  0.00         0 C  
ATOM   4018  O   THR A 253     164.124 127.073 157.669  1.00  0.00         0 O  
ATOM   4019  CB  THR A 253     166.443 126.732 155.656  1.00  0.00         0 C  
ATOM   4020  OG1 THR A 253     167.026 128.008 155.382  1.00  0.00           O  
ATOM   4021  CG2 THR A 253     167.183 125.718 154.767  1.00  0.00           C  
ATOM   4022  H   THR A 253     165.413 127.767 153.728  1.00  0.00         0 H  
ATOM   4023  HA  THR A 253     164.591 125.633 155.515  1.00  0.00           H  
ATOM   4024  HB3 THR A 253     166.658 126.480 156.697  1.00  0.00           H  
ATOM   4025  HG1 THR A 253     166.666 128.679 155.959  1.00  0.00           H  
ATOM   4026 HG21 THR A 253     168.247 125.693 155.000  1.00  0.00           H  
ATOM   4027 HG22 THR A 253     166.793 124.710 154.911  1.00  0.00           H  
ATOM   4028 HG23 THR A 253     167.087 125.958 153.707  1.00  0.00           H  
ATOM   4029  N   ASN A 254     163.712 128.671 156.144  1.00  0.00         0 N  
ATOM   4030  CA  ASN A 254     163.348 129.705 157.086  1.00  0.00         0 C  
ATOM   4031  C   ASN A 254     161.858 129.691 157.318  1.00  0.00         0 C  
ATOM   4032  O   ASN A 254     161.081 130.147 156.479  1.00  0.00         0 O  
ATOM   4033  CB  ASN A 254     163.712 131.090 156.495  1.00  0.00         0 C  
ATOM   4034  CG  ASN A 254     165.196 131.435 156.625  1.00  0.00           C  
ATOM   4035  OD1 ASN A 254     166.056 130.729 156.107  1.00  0.00           O  
ATOM   4036  ND2 ASN A 254     165.519 132.504 157.343  1.00  0.00           N  
ATOM   4037  H   ASN A 254     163.735 128.902 155.164  1.00  0.00         0 H  
ATOM   4038  HA  ASN A 254     163.873 129.582 158.037  1.00  0.00           H  
ATOM   4039  HB2 ASN A 254     163.432 131.142 155.441  1.00  0.00           H  
ATOM   4040  HB3 ASN A 254     163.141 131.871 157.000  1.00  0.00           H  
ATOM   4041 HD21 ASN A 254     166.492 132.750 157.444  1.00  0.00           H  
ATOM   4042 HD22 ASN A 254     164.814 133.074 157.784  1.00  0.00           H  
ATOM   4043  N   LEU A 255     161.486 129.239 158.514  1.00  0.00         0 N  
ATOM   4044  CA  LEU A 255     160.113 129.071 158.953  1.00  0.00         0 C  
ATOM   4045  C   LEU A 255     159.237 130.319 158.893  1.00  0.00         0 C  
ATOM   4046  O   LEU A 255     158.011 130.245 158.849  1.00  0.00         0 O  
ATOM   4047  CB  LEU A 255     160.106 128.443 160.366  1.00  0.00           C  
ATOM   4048  CG  LEU A 255     160.585 129.321 161.548  1.00  0.00           C  
ATOM   4049  CD1 LEU A 255     159.437 130.113 162.207  1.00  0.00           C  
ATOM   4050  CD2 LEU A 255     161.262 128.446 162.612  1.00  0.00           C  
ATOM   4051  H   LEU A 255     162.207 128.856 159.109  1.00  0.00         0 H  
ATOM   4052  HB2 LEU A 255     159.102 128.100 160.592  1.00  0.00           H  
ATOM   4053  HB3 LEU A 255     160.705 127.532 160.323  1.00  0.00           H  
ATOM   4054  HG  LEU A 255     161.334 130.029 161.191  1.00  0.00           H  
ATOM   4055 HD11 LEU A 255     159.796 130.677 163.069  1.00  0.00           H  
ATOM   4056 HD12 LEU A 255     158.980 130.837 161.536  1.00  0.00           H  
ATOM   4057 HD13 LEU A 255     158.646 129.450 162.558  1.00  0.00           H  
ATOM   4058 HD21 LEU A 255     161.614 129.045 163.453  1.00  0.00           H  
ATOM   4059 HD22 LEU A 255     160.574 127.696 163.006  1.00  0.00           H  
ATOM   4060 HD23 LEU A 255     162.127 127.920 162.205  1.00  0.00           H  
ATOM   4061  HA  LEU A 255     159.691 128.387 158.227  1.00  0.00           H  
ATOM   4062  N   VAL A 256     159.899 131.469 158.901  1.00  0.00         0 N  
ATOM   4063  CA  VAL A 256     159.300 132.771 158.947  1.00  0.00         0 C  
ATOM   4064  C   VAL A 256     158.552 133.102 157.672  1.00  0.00         0 C  
ATOM   4065  O   VAL A 256     157.343 133.333 157.684  1.00  0.00         0 O  
ATOM   4066  CB  VAL A 256     160.425 133.814 159.224  1.00  0.00         0 C  
ATOM   4067  CG1 VAL A 256     159.903 135.263 159.305  1.00  0.00           C  
ATOM   4068  CG2 VAL A 256     161.219 133.480 160.504  1.00  0.00           C  
ATOM   4069  H   VAL A 256     160.902 131.406 158.919  1.00  0.00         0 H  
ATOM   4070  HA  VAL A 256     158.583 132.793 159.771  1.00  0.00           H  
ATOM   4071  HB3 VAL A 256     161.140 133.788 158.400  1.00  0.00           H  
ATOM   4072 HG11 VAL A 256     160.707 135.959 159.543  1.00  0.00           H  
ATOM   4073 HG12 VAL A 256     159.473 135.600 158.360  1.00  0.00           H  
ATOM   4074 HG13 VAL A 256     159.136 135.367 160.074  1.00  0.00           H  
ATOM   4075 HG21 VAL A 256     161.981 134.235 160.702  1.00  0.00           H  
ATOM   4076 HG22 VAL A 256     160.563 133.441 161.375  1.00  0.00           H  
ATOM   4077 HG23 VAL A 256     161.737 132.524 160.438  1.00  0.00           H  
ATOM   4078  N   PHE A 257     159.293 133.057 156.565  1.00  0.00         0 N  
ATOM   4079  CA  PHE A 257     158.774 133.278 155.231  1.00  0.00         0 C  
ATOM   4080  C   PHE A 257     157.742 132.223 154.853  1.00  0.00         0 C  
ATOM   4081  O   PHE A 257     156.833 132.485 154.070  1.00  0.00         0 O  
ATOM   4082  CB  PHE A 257     159.943 133.353 154.234  1.00  0.00         0 C  
ATOM   4083  CG  PHE A 257     160.883 134.491 154.601  1.00  0.00           C  
ATOM   4084  CD1 PHE A 257     160.450 135.829 154.480  1.00  0.00           C  
ATOM   4085  CD2 PHE A 257     162.149 134.218 155.155  1.00  0.00           C  
ATOM   4086  CE1 PHE A 257     161.257 136.880 154.954  1.00  0.00           C  
ATOM   4087  CE2 PHE A 257     162.959 135.269 155.627  1.00  0.00           C  
ATOM   4088  CZ  PHE A 257     162.507 136.600 155.536  1.00  0.00           C  
ATOM   4089  H   PHE A 257     160.265 132.802 156.647  1.00  0.00         0 H  
ATOM   4090  HA  PHE A 257     158.278 134.245 155.223  1.00  0.00           H  
ATOM   4091  HB2 PHE A 257     160.486 132.406 154.200  1.00  0.00           H  
ATOM   4092  HB3 PHE A 257     159.567 133.524 153.224  1.00  0.00           H  
ATOM   4093  HD1 PHE A 257     159.486 136.054 154.048  1.00  0.00           H  
ATOM   4094  HD2 PHE A 257     162.492 133.201 155.235  1.00  0.00           H  
ATOM   4095  HE1 PHE A 257     160.912 137.902 154.879  1.00  0.00           H  
ATOM   4096  HE2 PHE A 257     163.922 135.057 156.068  1.00  0.00           H  
ATOM   4097  HZ  PHE A 257     163.121 137.407 155.910  1.00  0.00           H  
ATOM   4098  N   HIS A 258     157.848 131.067 155.506  1.00  0.00         0 N  
ATOM   4099  CA  HIS A 258     156.944 129.964 155.368  1.00  0.00         0 C  
ATOM   4100  C   HIS A 258     155.544 130.198 155.892  1.00  0.00         0 C  
ATOM   4101  O   HIS A 258     154.571 130.054 155.146  1.00  0.00         0 O  
ATOM   4102  CB  HIS A 258     157.594 128.666 155.839  1.00  0.00           C  
ATOM   4103  CG  HIS A 258     158.807 128.220 155.043  1.00  0.00           C  
ATOM   4104  ND1 HIS A 258     159.362 128.961 153.987  1.00  0.00           N  
ATOM   4105  CD2 HIS A 258     159.572 127.087 155.220  1.00  0.00           C  
ATOM   4106  CE1 HIS A 258     160.443 128.294 153.621  1.00  0.00           C  
ATOM   4107  NE2 HIS A 258     160.590 127.157 154.290  1.00  0.00           N  
ATOM   4108  H   HIS A 258     158.669 130.922 156.075  1.00  0.00         0 H  
ATOM   4109  HB2 HIS A 258     157.911 128.824 156.857  1.00  0.00           H  
ATOM   4110  HB3 HIS A 258     156.871 127.850 155.835  1.00  0.00           H  
ATOM   4111  HD2 HIS A 258     159.493 126.273 155.921  1.00  0.00           H  
ATOM   4112  HE1 HIS A 258     161.117 128.626 152.846  1.00  0.00           H  
ATOM   4113  HE2 HIS A 258     161.348 126.486 154.133  1.00  0.00           H  
ATOM   4114  HA  HIS A 258     156.800 129.829 154.293  1.00  0.00           H  
ATOM   4115  N   ILE A 259     155.430 130.620 157.148  1.00  0.00         0 N  
ATOM   4116  CA  ILE A 259     154.123 130.811 157.750  1.00  0.00         0 C  
ATOM   4117  C   ILE A 259     153.433 132.041 157.204  1.00  0.00         0 C  
ATOM   4118  O   ILE A 259     152.218 132.022 157.059  1.00  0.00         0 O  
ATOM   4119  CB  ILE A 259     154.250 130.935 159.300  1.00  0.00         0 C  
ATOM   4120  CG1 ILE A 259     154.894 129.684 159.933  1.00  0.00           C  
ATOM   4121  CG2 ILE A 259     152.897 131.204 160.007  1.00  0.00           C  
ATOM   4122  CD1 ILE A 259     155.567 129.976 161.285  1.00  0.00           C  
ATOM   4123  H   ILE A 259     156.263 130.753 157.712  1.00  0.00         0 H  
ATOM   4124  HA  ILE A 259     153.492 129.947 157.526  1.00  0.00           H  
ATOM   4125  HB3 ILE A 259     154.906 131.785 159.503  1.00  0.00           H  
ATOM   4126 HG12 ILE A 259     154.152 128.892 160.043  1.00  0.00           H  
ATOM   4127 HG13 ILE A 259     155.641 129.282 159.256  1.00  0.00           H  
ATOM   4128 HG21 ILE A 259     152.996 131.207 161.091  1.00  0.00           H  
ATOM   4129 HG22 ILE A 259     152.475 132.173 159.742  1.00  0.00           H  
ATOM   4130 HG23 ILE A 259     152.158 130.443 159.749  1.00  0.00           H  
ATOM   4131 HD11 ILE A 259     155.991 129.079 161.731  1.00  0.00           H  
ATOM   4132 HD12 ILE A 259     156.378 130.696 161.168  1.00  0.00           H  
ATOM   4133 HD13 ILE A 259     154.865 130.382 162.012  1.00  0.00           H  
ATOM   4134  N   ILE A 260     154.182 133.101 156.894  1.00  0.00         0 N  
ATOM   4135  CA  ILE A 260     153.548 134.289 156.364  1.00  0.00         0 C  
ATOM   4136  C   ILE A 260     153.006 134.081 154.958  1.00  0.00         0 C  
ATOM   4137  O   ILE A 260     151.947 134.600 154.617  1.00  0.00         0 O  
ATOM   4138  CB  ILE A 260     154.498 135.518 156.427  1.00  0.00           C  
ATOM   4139  CG1 ILE A 260     155.694 135.447 155.453  1.00  0.00           C  
ATOM   4140  CG2 ILE A 260     154.921 135.799 157.884  1.00  0.00           C  
ATOM   4141  CD1 ILE A 260     156.702 136.597 155.573  1.00  0.00           C  
ATOM   4142  H   ILE A 260     155.182 133.085 157.052  1.00  0.00         0 H  
ATOM   4143  HB  ILE A 260     153.905 136.381 156.115  1.00  0.00           H  
ATOM   4144 HG12 ILE A 260     156.196 134.498 155.602  1.00  0.00           H  
ATOM   4145 HG13 ILE A 260     155.336 135.442 154.422  1.00  0.00           H  
ATOM   4146 HG21 ILE A 260     155.435 136.755 157.979  1.00  0.00           H  
ATOM   4147 HG22 ILE A 260     154.052 135.843 158.541  1.00  0.00           H  
ATOM   4148 HG23 ILE A 260     155.584 135.030 158.277  1.00  0.00           H  
ATOM   4149 HD11 ILE A 260     157.399 136.584 154.737  1.00  0.00           H  
ATOM   4150 HD12 ILE A 260     156.202 137.566 155.562  1.00  0.00           H  
ATOM   4151 HD13 ILE A 260     157.287 136.521 156.490  1.00  0.00           H  
ATOM   4152  HA  ILE A 260     152.709 134.535 157.012  1.00  0.00           H  
ATOM   4153  N   PHE A 261     153.702 133.262 154.174  1.00  0.00         0 N  
ATOM   4154  CA  PHE A 261     153.260 132.879 152.860  1.00  0.00         0 C  
ATOM   4155  C   PHE A 261     151.957 132.093 152.930  1.00  0.00         0 C  
ATOM   4156  O   PHE A 261     150.899 132.549 152.491  1.00  0.00         0 O  
ATOM   4157  CB  PHE A 261     154.393 132.091 152.155  1.00  0.00           C  
ATOM   4158  CG  PHE A 261     154.203 131.663 150.703  1.00  0.00           C  
ATOM   4159  CD1 PHE A 261     154.080 132.629 149.681  1.00  0.00           C  
ATOM   4160  CD2 PHE A 261     154.252 130.294 150.355  1.00  0.00           C  
ATOM   4161  CE1 PHE A 261     154.071 132.235 148.329  1.00  0.00           C  
ATOM   4162  CE2 PHE A 261     154.219 129.899 149.002  1.00  0.00           C  
ATOM   4163  CZ  PHE A 261     154.147 130.872 147.987  1.00  0.00           C  
ATOM   4164  H   PHE A 261     154.550 132.842 154.532  1.00  0.00         0 H  
ATOM   4165  HB2 PHE A 261     155.281 132.721 152.141  1.00  0.00           H  
ATOM   4166  HB3 PHE A 261     154.666 131.216 152.745  1.00  0.00           H  
ATOM   4167  HD1 PHE A 261     154.012 133.679 149.924  1.00  0.00           H  
ATOM   4168  HD2 PHE A 261     154.344 129.539 151.124  1.00  0.00           H  
ATOM   4169  HE1 PHE A 261     154.023 132.978 147.549  1.00  0.00           H  
ATOM   4170  HE2 PHE A 261     154.269 128.852 148.740  1.00  0.00           H  
ATOM   4171  HZ  PHE A 261     154.150 130.575 146.948  1.00  0.00           H  
ATOM   4172  HA  PHE A 261     153.066 133.786 152.283  1.00  0.00           H  
ATOM   4173  N   ALA A 262     151.997 130.973 153.640  1.00  0.00         0 N  
ATOM   4174  CA  ALA A 262     150.837 130.148 153.867  1.00  0.00         0 C  
ATOM   4175  C   ALA A 262     150.105 130.542 155.166  1.00  0.00         0 C  
ATOM   4176  O   ALA A 262     149.702 129.706 155.973  1.00  0.00         0 O  
ATOM   4177  CB  ALA A 262     151.339 128.696 153.981  1.00  0.00         0 C  
ATOM   4178  H   ALA A 262     152.865 130.703 154.094  1.00  0.00         0 H  
ATOM   4179  HA  ALA A 262     150.132 130.205 153.035  1.00  0.00           H  
ATOM   4180  HB1 ALA A 262     150.506 128.004 154.100  1.00  0.00           H  
ATOM   4181  HB2 ALA A 262     151.882 128.392 153.086  1.00  0.00           H  
ATOM   4182  HB3 ALA A 262     152.002 128.561 154.837  1.00  0.00           H  
ATOM   4183  N   ILE A 263     149.837 131.839 155.292  1.00  0.00         0 N  
ATOM   4184  CA  ILE A 263     148.741 132.414 156.063  1.00  0.00         0 C  
ATOM   4185  C   ILE A 263     148.088 133.432 155.149  1.00  0.00         0 C  
ATOM   4186  O   ILE A 263     146.872 133.438 154.986  1.00  0.00         0 O  
ATOM   4187  CB  ILE A 263     149.160 132.881 157.483  1.00  0.00         0 C  
ATOM   4188  CG1 ILE A 263     147.953 132.943 158.444  1.00  0.00           C  
ATOM   4189  CG2 ILE A 263     149.915 134.221 157.494  1.00  0.00           C  
ATOM   4190  CD1 ILE A 263     148.359 133.106 159.917  1.00  0.00           C  
ATOM   4191  H   ILE A 263     150.262 132.424 154.586  1.00  0.00         0 H  
ATOM   4192  HA  ILE A 263     148.007 131.629 156.231  1.00  0.00           H  
ATOM   4193  HB3 ILE A 263     149.827 132.112 157.875  1.00  0.00           H  
ATOM   4194 HG12 ILE A 263     147.279 133.751 158.155  1.00  0.00           H  
ATOM   4195 HG13 ILE A 263     147.368 132.028 158.355  1.00  0.00           H  
ATOM   4196 HG21 ILE A 263     150.473 134.359 158.420  1.00  0.00           H  
ATOM   4197 HG22 ILE A 263     150.625 134.251 156.679  1.00  0.00           H  
ATOM   4198 HG23 ILE A 263     149.244 135.071 157.370  1.00  0.00           H  
ATOM   4199 HD11 ILE A 263     147.489 133.029 160.570  1.00  0.00           H  
ATOM   4200 HD12 ILE A 263     149.070 132.338 160.222  1.00  0.00           H  
ATOM   4201 HD13 ILE A 263     148.820 134.076 160.102  1.00  0.00           H  
ATOM   4202  N   LEU A 264     148.908 134.214 154.443  1.00  0.00         0 N  
ATOM   4203  CA  LEU A 264     148.422 135.202 153.518  1.00  0.00         0 C  
ATOM   4204  C   LEU A 264     147.764 134.626 152.283  1.00  0.00         0 C  
ATOM   4205  O   LEU A 264     146.643 134.996 151.933  1.00  0.00         0 O  
ATOM   4206  CB  LEU A 264     149.569 136.143 153.089  1.00  0.00           C  
ATOM   4207  CG  LEU A 264     150.106 137.059 154.213  1.00  0.00           C  
ATOM   4208  CD1 LEU A 264     151.406 137.743 153.768  1.00  0.00           C  
ATOM   4209  CD2 LEU A 264     149.077 138.109 154.663  1.00  0.00           C  
ATOM   4210  H   LEU A 264     149.910 134.189 154.611  1.00  0.00         0 H  
ATOM   4211  HB2 LEU A 264     150.387 135.545 152.679  1.00  0.00           H  
ATOM   4212  HB3 LEU A 264     149.237 136.776 152.264  1.00  0.00           H  
ATOM   4213  HG  LEU A 264     150.342 136.451 155.086  1.00  0.00           H  
ATOM   4214 HD11 LEU A 264     151.843 138.328 154.578  1.00  0.00           H  
ATOM   4215 HD12 LEU A 264     152.155 137.013 153.457  1.00  0.00           H  
ATOM   4216 HD13 LEU A 264     151.226 138.414 152.928  1.00  0.00           H  
ATOM   4217 HD21 LEU A 264     149.507 138.776 155.412  1.00  0.00           H  
ATOM   4218 HD22 LEU A 264     148.739 138.725 153.829  1.00  0.00           H  
ATOM   4219 HD23 LEU A 264     148.200 137.653 155.122  1.00  0.00           H  
ATOM   4220  HA  LEU A 264     147.660 135.786 154.031  1.00  0.00           H  
ATOM   4221  N   ASN A 265     148.453 133.693 151.638  1.00  0.00         0 N  
ATOM   4222  CA  ASN A 265     147.993 133.105 150.393  1.00  0.00         0 C  
ATOM   4223  C   ASN A 265     146.909 132.077 150.632  1.00  0.00         0 C  
ATOM   4224  O   ASN A 265     146.106 131.841 149.728  1.00  0.00         0 O  
ATOM   4225  CB  ASN A 265     149.187 132.520 149.609  1.00  0.00           C  
ATOM   4226  CG  ASN A 265     150.122 133.648 149.164  1.00  0.00           C  
ATOM   4227  OD1 ASN A 265     151.015 134.071 149.887  1.00  0.00           O  
ATOM   4228  ND2 ASN A 265     149.878 134.223 147.998  1.00  0.00           N  
ATOM   4229  H   ASN A 265     149.388 133.443 151.965  1.00  0.00         0 H  
ATOM   4230  HB2 ASN A 265     149.744 131.795 150.206  1.00  0.00           H  
ATOM   4231  HB3 ASN A 265     148.836 131.992 148.720  1.00  0.00           H  
ATOM   4232 HD22 ASN A 265     150.457 134.999 147.714  1.00  0.00           H  
ATOM   4233 HD21 ASN A 265     149.208 133.855 147.336  1.00  0.00           H  
ATOM   4234  HA  ASN A 265     147.553 133.891 149.776  1.00  0.00           H  
ATOM   4235  N   VAL A 266     146.815 131.582 151.874  1.00  0.00         0 N  
ATOM   4236  CA  VAL A 266     145.699 130.770 152.298  1.00  0.00         0 C  
ATOM   4237  C   VAL A 266     144.442 131.523 152.679  1.00  0.00         0 C  
ATOM   4238  O   VAL A 266     143.344 130.995 152.511  1.00  0.00         0 O  
ATOM   4239  CB  VAL A 266     146.084 129.630 153.273  1.00  0.00         0 C  
ATOM   4240  CG1 VAL A 266     146.993 128.592 152.590  1.00  0.00           C  
ATOM   4241  CG2 VAL A 266     146.736 130.114 154.552  1.00  0.00           C  
ATOM   4242  H   VAL A 266     147.498 131.868 152.557  1.00  0.00         0 H  
ATOM   4243  HA  VAL A 266     145.366 130.221 151.413  1.00  0.00           H  
ATOM   4244  HB3 VAL A 266     145.170 129.102 153.553  1.00  0.00           H  
ATOM   4245 HG11 VAL A 266     147.198 127.750 153.252  1.00  0.00           H  
ATOM   4246 HG12 VAL A 266     146.530 128.185 151.690  1.00  0.00           H  
ATOM   4247 HG13 VAL A 266     147.952 129.020 152.301  1.00  0.00           H  
ATOM   4248 HG21 VAL A 266     147.095 129.295 155.174  1.00  0.00           H  
ATOM   4249 HG22 VAL A 266     147.585 130.727 154.282  1.00  0.00           H  
ATOM   4250 HG23 VAL A 266     146.055 130.701 155.154  1.00  0.00           H  
ATOM   4251  N   PHE A 267     144.583 132.781 153.076  1.00  0.00         0 N  
ATOM   4252  CA  PHE A 267     143.441 133.615 153.373  1.00  0.00         0 C  
ATOM   4253  C   PHE A 267     143.060 134.591 152.285  1.00  0.00         0 C  
ATOM   4254  O   PHE A 267     142.158 135.411 152.446  1.00  0.00         0 O  
ATOM   4255  CB  PHE A 267     143.708 134.403 154.685  1.00  0.00           C  
ATOM   4256  CG  PHE A 267     143.324 133.674 155.967  1.00  0.00           C  
ATOM   4257  CD1 PHE A 267     144.081 132.582 156.433  1.00  0.00           C  
ATOM   4258  CD2 PHE A 267     142.203 134.095 156.712  1.00  0.00           C  
ATOM   4259  CE1 PHE A 267     143.727 131.909 157.618  1.00  0.00           C  
ATOM   4260  CE2 PHE A 267     141.841 133.427 157.898  1.00  0.00           C  
ATOM   4261  CZ  PHE A 267     142.600 132.330 158.350  1.00  0.00           C  
ATOM   4262  H   PHE A 267     145.508 133.157 153.248  1.00  0.00         0 H  
ATOM   4263  HB2 PHE A 267     144.746 134.727 154.743  1.00  0.00           H  
ATOM   4264  HB3 PHE A 267     143.144 135.337 154.700  1.00  0.00           H  
ATOM   4265  HD1 PHE A 267     144.942 132.266 155.879  1.00  0.00           H  
ATOM   4266  HD2 PHE A 267     141.625 134.942 156.378  1.00  0.00           H  
ATOM   4267  HE1 PHE A 267     144.314 131.069 157.961  1.00  0.00           H  
ATOM   4268  HE2 PHE A 267     140.986 133.763 158.467  1.00  0.00           H  
ATOM   4269  HZ  PHE A 267     142.323 131.817 159.260  1.00  0.00           H  
ATOM   4270  HA  PHE A 267     142.540 133.022 153.547  1.00  0.00           H  
ATOM   4271  N   GLN A 268     143.695 134.444 151.136  1.00  0.00         0 N  
ATOM   4272  CA  GLN A 268     143.479 135.210 149.937  1.00  0.00         0 C  
ATOM   4273  C   GLN A 268     142.023 135.291 149.506  1.00  0.00         0 C  
ATOM   4274  O   GLN A 268     141.519 136.362 149.188  1.00  0.00         0 O  
ATOM   4275  CB  GLN A 268     144.401 134.549 148.895  1.00  0.00           C  
ATOM   4276  CG  GLN A 268     144.622 135.263 147.549  1.00  0.00           C  
ATOM   4277  CD  GLN A 268     145.602 134.505 146.639  1.00  0.00           C  
ATOM   4278  OE1 GLN A 268     145.933 134.962 145.553  1.00  0.00           O  
ATOM   4279  NE2 GLN A 268     146.104 133.339 147.045  1.00  0.00           N  
ATOM   4280  H   GLN A 268     144.451 133.775 151.140  1.00  0.00         0 H  
ATOM   4281  HB2 GLN A 268     145.381 134.445 149.357  1.00  0.00           H  
ATOM   4282  HB3 GLN A 268     144.037 133.537 148.704  1.00  0.00           H  
ATOM   4283  HG2 GLN A 268     143.682 135.374 147.017  1.00  0.00           H  
ATOM   4284  HG3 GLN A 268     145.010 136.273 147.713  1.00  0.00           H  
ATOM   4285 HE22 GLN A 268     146.735 132.850 146.430  1.00  0.00           H  
ATOM   4286 HE21 GLN A 268     145.832 132.913 147.925  1.00  0.00           H  
ATOM   4287  HA  GLN A 268     143.832 136.224 150.127  1.00  0.00           H  
ATOM   4288  N   GLY A 269     141.322 134.168 149.642  1.00  0.00         0 N  
ATOM   4289  CA  GLY A 269     139.903 134.085 149.391  1.00  0.00         0 C  
ATOM   4290  C   GLY A 269     139.013 134.858 150.340  1.00  0.00         0 C  
ATOM   4291  O   GLY A 269     137.934 135.292 149.942  1.00  0.00         0 O  
ATOM   4292  H   GLY A 269     141.811 133.347 149.965  1.00  0.00         0 H  
ATOM   4293  HA3 GLY A 269     139.613 133.038 149.450  1.00  0.00           H  
ATOM   4294  HA2 GLY A 269     139.696 134.406 148.368  1.00  0.00           H  
ATOM   4295  N   LEU A 270     139.488 135.076 151.568  1.00  0.00         0 N  
ATOM   4296  CA  LEU A 270     138.822 135.949 152.507  1.00  0.00         0 C  
ATOM   4297  C   LEU A 270     139.068 137.391 152.133  1.00  0.00         0 C  
ATOM   4298  O   LEU A 270     138.129 138.182 152.024  1.00  0.00         0 O  
ATOM   4299  CB  LEU A 270     139.305 135.677 153.954  1.00  0.00         0 C  
ATOM   4300  CG  LEU A 270     138.513 136.425 155.055  1.00  0.00           C  
ATOM   4301  CD1 LEU A 270     137.042 135.983 155.128  1.00  0.00           C  
ATOM   4302  CD2 LEU A 270     139.185 136.247 156.422  1.00  0.00           C  
ATOM   4303  H   LEU A 270     140.445 134.817 151.775  1.00  0.00         0 H  
ATOM   4304  HA  LEU A 270     137.750 135.755 152.451  1.00  0.00           H  
ATOM   4305  HB2 LEU A 270     139.251 134.605 154.151  1.00  0.00           H  
ATOM   4306  HB3 LEU A 270     140.356 135.942 154.055  1.00  0.00           H  
ATOM   4307  HG  LEU A 270     138.525 137.495 154.842  1.00  0.00           H  
ATOM   4308 HD11 LEU A 270     136.524 136.471 155.954  1.00  0.00           H  
ATOM   4309 HD12 LEU A 270     136.492 136.235 154.222  1.00  0.00           H  
ATOM   4310 HD13 LEU A 270     136.958 134.906 155.278  1.00  0.00           H  
ATOM   4311 HD21 LEU A 270     138.616 136.742 157.211  1.00  0.00           H  
ATOM   4312 HD22 LEU A 270     139.268 135.193 156.690  1.00  0.00           H  
ATOM   4313 HD23 LEU A 270     140.184 136.683 156.429  1.00  0.00           H  
ATOM   4314  N   PHE A 271     140.340 137.696 151.877  1.00  0.00         0 N  
ATOM   4315  CA  PHE A 271     140.815 139.000 151.474  1.00  0.00         0 C  
ATOM   4316  C   PHE A 271     140.117 139.576 150.247  1.00  0.00         0 C  
ATOM   4317  O   PHE A 271     139.829 140.771 150.176  1.00  0.00         0 O  
ATOM   4318  CB  PHE A 271     142.350 139.007 151.388  1.00  0.00           C  
ATOM   4319  CG  PHE A 271     143.077 138.606 152.673  1.00  0.00           C  
ATOM   4320  CD1 PHE A 271     142.499 138.804 153.953  1.00  0.00           C  
ATOM   4321  CD2 PHE A 271     144.357 138.019 152.587  1.00  0.00           C  
ATOM   4322  CE1 PHE A 271     143.178 138.399 155.117  1.00  0.00           C  
ATOM   4323  CE2 PHE A 271     145.041 137.627 153.753  1.00  0.00           C  
ATOM   4324  CZ  PHE A 271     144.453 137.812 155.019  1.00  0.00           C  
ATOM   4325  H   PHE A 271     141.036 136.968 152.010  1.00  0.00         0 H  
ATOM   4326  HB2 PHE A 271     142.672 138.353 150.577  1.00  0.00           H  
ATOM   4327  HB3 PHE A 271     142.691 140.007 151.120  1.00  0.00           H  
ATOM   4328  HD1 PHE A 271     141.527 139.254 154.076  1.00  0.00           H  
ATOM   4329  HD2 PHE A 271     144.825 137.859 151.627  1.00  0.00           H  
ATOM   4330  HE1 PHE A 271     142.721 138.543 156.085  1.00  0.00           H  
ATOM   4331  HE2 PHE A 271     146.017 137.178 153.673  1.00  0.00           H  
ATOM   4332  HZ  PHE A 271     144.974 137.502 155.913  1.00  0.00           H  
ATOM   4333  HA  PHE A 271     140.526 139.693 152.264  1.00  0.00           H  
ATOM   4334  N   ILE A 272     139.740 138.681 149.344  1.00  0.00         0 N  
ATOM   4335  CA  ILE A 272     139.030 138.988 148.133  1.00  0.00         0 C  
ATOM   4336  C   ILE A 272     137.524 139.166 148.270  1.00  0.00         0 C  
ATOM   4337  O   ILE A 272     136.883 139.670 147.352  1.00  0.00         0 O  
ATOM   4338  CB  ILE A 272     139.352 137.826 147.110  1.00  0.00           C  
ATOM   4339  CG1 ILE A 272     140.815 137.934 146.614  1.00  0.00           C  
ATOM   4340  CG2 ILE A 272     138.417 137.693 145.878  1.00  0.00           C  
ATOM   4341  CD1 ILE A 272     141.347 136.704 145.860  1.00  0.00           C  
ATOM   4342  H   ILE A 272     140.074 137.729 149.460  1.00  0.00         0 H  
ATOM   4343  HB  ILE A 272     139.253 136.884 147.652  1.00  0.00           H  
ATOM   4344 HG12 ILE A 272     140.935 138.819 145.992  1.00  0.00           H  
ATOM   4345 HG13 ILE A 272     141.465 138.097 147.465  1.00  0.00           H  
ATOM   4346 HG21 ILE A 272     138.715 136.882 145.217  1.00  0.00           H  
ATOM   4347 HG22 ILE A 272     137.392 137.458 146.163  1.00  0.00           H  
ATOM   4348 HG23 ILE A 272     138.401 138.611 145.288  1.00  0.00           H  
ATOM   4349 HD11 ILE A 272     142.408 136.825 145.640  1.00  0.00           H  
ATOM   4350 HD12 ILE A 272     141.231 135.796 146.452  1.00  0.00           H  
ATOM   4351 HD13 ILE A 272     140.850 136.549 144.904  1.00  0.00           H  
ATOM   4352  HA  ILE A 272     139.410 139.925 147.719  1.00  0.00           H  
ATOM   4353  N   LEU A 273     136.933 138.808 149.397  1.00  0.00         0 N  
ATOM   4354  CA  LEU A 273     135.572 139.220 149.661  1.00  0.00         0 C  
ATOM   4355  C   LEU A 273     135.660 140.493 150.448  1.00  0.00         0 C  
ATOM   4356  O   LEU A 273     135.246 141.542 149.955  1.00  0.00         0 O  
ATOM   4357  CB  LEU A 273     134.882 138.072 150.440  1.00  0.00           C  
ATOM   4358  CG  LEU A 273     133.371 138.235 150.720  1.00  0.00           C  
ATOM   4359  CD1 LEU A 273     132.550 138.555 149.457  1.00  0.00           C  
ATOM   4360  CD2 LEU A 273     132.830 136.959 151.381  1.00  0.00           C  
ATOM   4361  H   LEU A 273     137.491 138.401 150.140  1.00  0.00         0 H  
ATOM   4362  HB2 LEU A 273     135.015 137.156 149.859  1.00  0.00           H  
ATOM   4363  HB3 LEU A 273     135.400 137.880 151.381  1.00  0.00           H  
ATOM   4364  HG  LEU A 273     133.237 139.053 151.428  1.00  0.00           H  
ATOM   4365 HD11 LEU A 273     131.479 138.538 149.664  1.00  0.00           H  
ATOM   4366 HD12 LEU A 273     132.777 139.546 149.065  1.00  0.00           H  
ATOM   4367 HD13 LEU A 273     132.742 137.830 148.666  1.00  0.00           H  
ATOM   4368 HD21 LEU A 273     131.772 137.056 151.629  1.00  0.00           H  
ATOM   4369 HD22 LEU A 273     132.935 136.100 150.718  1.00  0.00           H  
ATOM   4370 HD23 LEU A 273     133.364 136.729 152.303  1.00  0.00           H  
ATOM   4371  HA  LEU A 273     135.004 139.398 148.746  1.00  0.00           H  
ATOM   4372  N   LEU A 274     136.325 140.385 151.597  1.00  0.00         0 N  
ATOM   4373  CA  LEU A 274     136.526 141.375 152.627  1.00  0.00         0 C  
ATOM   4374  C   LEU A 274     136.978 142.739 152.132  1.00  0.00         0 C  
ATOM   4375  O   LEU A 274     136.505 143.766 152.613  1.00  0.00         0 O  
ATOM   4376  CB  LEU A 274     137.493 140.773 153.670  1.00  0.00         0 C  
ATOM   4377  CG  LEU A 274     137.599 141.524 155.010  1.00  0.00           C  
ATOM   4378  CD1 LEU A 274     136.272 141.508 155.789  1.00  0.00           C  
ATOM   4379  CD2 LEU A 274     138.727 140.922 155.862  1.00  0.00           C  
ATOM   4380  H   LEU A 274     136.744 139.479 151.788  1.00  0.00         0 H  
ATOM   4381  HA  LEU A 274     135.559 141.497 153.110  1.00  0.00           H  
ATOM   4382  HB2 LEU A 274     137.193 139.747 153.892  1.00  0.00           H  
ATOM   4383  HB3 LEU A 274     138.486 140.703 153.223  1.00  0.00           H  
ATOM   4384  HG  LEU A 274     137.864 142.564 154.816  1.00  0.00           H  
ATOM   4385 HD11 LEU A 274     136.386 141.978 156.767  1.00  0.00           H  
ATOM   4386 HD12 LEU A 274     135.487 142.058 155.270  1.00  0.00           H  
ATOM   4387 HD13 LEU A 274     135.917 140.490 155.954  1.00  0.00           H  
ATOM   4388 HD21 LEU A 274     138.837 141.462 156.803  1.00  0.00           H  
ATOM   4389 HD22 LEU A 274     138.535 139.875 156.101  1.00  0.00           H  
ATOM   4390 HD23 LEU A 274     139.685 140.976 155.345  1.00  0.00           H  
ATOM   4391  N   PHE A 275     137.831 142.739 151.114  1.00  0.00         0 N  
ATOM   4392  CA  PHE A 275     138.251 143.945 150.444  1.00  0.00         0 C  
ATOM   4393  C   PHE A 275     138.240 143.776 148.940  1.00  0.00         0 C  
ATOM   4394  O   PHE A 275     138.947 144.494 148.240  1.00  0.00         0 O  
ATOM   4395  CB  PHE A 275     139.677 144.343 150.920  1.00  0.00           C  
ATOM   4396  CG  PHE A 275     139.967 144.270 152.409  1.00  0.00           C  
ATOM   4397  CD1 PHE A 275     139.277 145.099 153.317  1.00  0.00           C  
ATOM   4398  CD2 PHE A 275     140.938 143.363 152.888  1.00  0.00           C  
ATOM   4399  CE1 PHE A 275     139.544 145.010 154.696  1.00  0.00           C  
ATOM   4400  CE2 PHE A 275     141.211 143.282 154.266  1.00  0.00           C  
ATOM   4401  CZ  PHE A 275     140.512 144.104 155.171  1.00  0.00           C  
ATOM   4402  H   PHE A 275     138.272 141.873 150.821  1.00  0.00         0 H  
ATOM   4403  HB2 PHE A 275     140.414 143.721 150.406  1.00  0.00           H  
ATOM   4404  HB3 PHE A 275     139.899 145.359 150.596  1.00  0.00           H  
ATOM   4405  HD1 PHE A 275     138.522 145.786 152.962  1.00  0.00           H  
ATOM   4406  HD2 PHE A 275     141.479 142.729 152.200  1.00  0.00           H  
ATOM   4407  HE1 PHE A 275     139.001 145.635 155.392  1.00  0.00           H  
ATOM   4408  HE2 PHE A 275     141.958 142.591 154.629  1.00  0.00           H  
ATOM   4409  HZ  PHE A 275     140.717 144.038 156.230  1.00  0.00           H  
ATOM   4410  HA  PHE A 275     137.558 144.749 150.662  1.00  0.00           H  
ATOM   4411  N   GLY A 276     137.442 142.838 148.439  1.00  0.00         0 N  
ATOM   4412  CA  GLY A 276     137.246 142.690 147.014  1.00  0.00         0 C  
ATOM   4413  C   GLY A 276     135.843 142.992 146.536  1.00  0.00         0 C  
ATOM   4414  O   GLY A 276     135.630 143.307 145.368  1.00  0.00         0 O  
ATOM   4415  H   GLY A 276     136.920 142.248 149.072  1.00  0.00         0 H  
ATOM   4416  HA3 GLY A 276     137.587 141.732 146.648  1.00  0.00           H  
ATOM   4417  HA2 GLY A 276     137.879 143.376 146.448  1.00  0.00           H  
ATOM   4418  N   CYS A 277     134.899 142.966 147.467  1.00  0.00         0 N  
ATOM   4419  CA  CYS A 277     133.535 143.404 147.277  1.00  0.00         0 C  
ATOM   4420  C   CYS A 277     133.033 144.091 148.530  1.00  0.00         0 C  
ATOM   4421  O   CYS A 277     132.216 145.002 148.457  1.00  0.00         0 O  
ATOM   4422  CB  CYS A 277     132.671 142.204 146.826  1.00  0.00         0 C  
ATOM   4423  SG  CYS A 277     131.040 142.726 146.216  1.00  0.00           S  
ATOM   4424  H   CYS A 277     135.165 142.622 148.379  1.00  0.00         0 H  
ATOM   4425  HA  CYS A 277     133.512 144.150 146.480  1.00  0.00           H  
ATOM   4426  HB2 CYS A 277     133.163 141.657 146.021  1.00  0.00           H  
ATOM   4427  HB3 CYS A 277     132.534 141.500 147.647  1.00  0.00           H  
ATOM   4428  HG  CYS A 277     130.744 143.517 147.256  1.00  0.00           H  
ATOM   4429  N   LEU A 278     133.546 143.680 149.690  1.00  0.00         0 N  
ATOM   4430  CA  LEU A 278     133.109 144.217 150.952  1.00  0.00         0 C  
ATOM   4431  C   LEU A 278     133.639 145.606 151.264  1.00  0.00         0 C  
ATOM   4432  O   LEU A 278     133.015 146.331 152.037  1.00  0.00         0 O  
ATOM   4433  CB  LEU A 278     133.518 143.288 152.125  1.00  0.00         0 C  
ATOM   4434  CG  LEU A 278     132.418 142.479 152.830  1.00  0.00           C  
ATOM   4435  CD1 LEU A 278     131.607 143.352 153.797  1.00  0.00           C  
ATOM   4436  CD2 LEU A 278     131.533 141.678 151.865  1.00  0.00           C  
ATOM   4437  H   LEU A 278     134.166 142.875 149.726  1.00  0.00         0 H  
ATOM   4438  HA  LEU A 278     132.021 144.308 150.942  1.00  0.00           H  
ATOM   4439  HB2 LEU A 278     134.246 142.581 151.778  1.00  0.00           H  
ATOM   4440  HB3 LEU A 278     134.036 143.844 152.910  1.00  0.00           H  
ATOM   4441  HG  LEU A 278     132.938 141.747 153.451  1.00  0.00           H  
ATOM   4442 HD11 LEU A 278     130.892 142.755 154.365  1.00  0.00           H  
ATOM   4443 HD12 LEU A 278     132.259 143.843 154.521  1.00  0.00           H  
ATOM   4444 HD13 LEU A 278     131.054 144.132 153.273  1.00  0.00           H  
ATOM   4445 HD21 LEU A 278     130.917 140.963 152.413  1.00  0.00           H  
ATOM   4446 HD22 LEU A 278     130.860 142.323 151.301  1.00  0.00           H  
ATOM   4447 HD23 LEU A 278     132.134 141.116 151.151  1.00  0.00           H  
ATOM   4448  N   TRP A 279     134.753 145.996 150.642  1.00  0.00         0 N  
ATOM   4449  CA  TRP A 279     135.189 147.375 150.728  1.00  0.00         0 C  
ATOM   4450  C   TRP A 279     134.337 148.290 149.811  1.00  0.00         0 C  
ATOM   4451  O   TRP A 279     134.373 149.511 149.961  1.00  0.00         0 O  
ATOM   4452  CB  TRP A 279     136.654 147.540 150.247  1.00  0.00         0 C  
ATOM   4453  CG  TRP A 279     136.894 147.655 148.762  1.00  0.00           C  
ATOM   4454  CD1 TRP A 279     136.769 146.667 147.849  1.00  0.00           C  
ATOM   4455  CD2 TRP A 279     137.205 148.861 147.998  1.00  0.00           C  
ATOM   4456  NE1 TRP A 279     137.025 147.166 146.590  1.00  0.00           N  
ATOM   4457  CE3 TRP A 279     137.428 150.217 148.335  1.00  0.00           C  
ATOM   4458  CE2 TRP A 279     137.288 148.518 146.617  1.00  0.00           C  
ATOM   4459  CZ3 TRP A 279     137.741 151.177 147.354  1.00  0.00           C  
ATOM   4460  CZ2 TRP A 279     137.576 149.469 145.623  1.00  0.00           C  
ATOM   4461  CH2 TRP A 279     137.815 150.805 145.998  1.00  0.00           C  
ATOM   4462  H   TRP A 279     135.216 145.360 150.016  1.00  0.00         0 H  
ATOM   4463  HA  TRP A 279     135.117 147.727 151.759  1.00  0.00           H  
ATOM   4464  HB2 TRP A 279     137.026 148.473 150.673  1.00  0.00           H  
ATOM   4465  HB3 TRP A 279     137.308 146.793 150.681  1.00  0.00           H  
ATOM   4466  HD1 TRP A 279     136.482 145.654 148.073  1.00  0.00           H  
ATOM   4467  HE1 TRP A 279     136.915 146.616 145.748  1.00  0.00           H  
ATOM   4468  HE3 TRP A 279     137.362 150.515 149.366  1.00  0.00           H  
ATOM   4469  HZ3 TRP A 279     137.919 152.203 147.643  1.00  0.00           H  
ATOM   4470  HZ2 TRP A 279     137.627 149.176 144.585  1.00  0.00           H  
ATOM   4471  HH2 TRP A 279     138.052 151.544 145.247  1.00  0.00           H  
ATOM   4472  N   ASP A 280     133.722 147.682 148.786  1.00  0.00         0 N  
ATOM   4473  CA  ASP A 280     133.457 148.268 147.480  1.00  0.00         0 C  
ATOM   4474  C   ASP A 280     132.061 148.907 147.482  1.00  0.00           C  
ATOM   4475  O   ASP A 280     131.067 148.154 147.582  1.00  0.00           O  
ATOM   4476  CB  ASP A 280     133.541 147.134 146.410  1.00  0.00         0 C  
ATOM   4477  OXT ASP A 280     131.998 150.153 147.434  1.00  0.00           O1-
ATOM   4478  CG  ASP A 280     134.107 147.543 145.045  1.00  0.00           C  
ATOM   4479  OD1 ASP A 280     133.934 148.717 144.651  1.00  0.00           O1-
ATOM   4480  OD2 ASP A 280     134.711 146.662 144.393  1.00  0.00           O  
ATOM   4481  H   ASP A 280     133.573 146.687 148.851  1.00  0.00         0 H  
ATOM   4482  HA  ASP A 280     134.213 149.032 147.279  1.00  0.00           H  
ATOM   4483  HB2 ASP A 280     134.205 146.352 146.774  1.00  0.00           H  
ATOM   4484  HB3 ASP A 280     132.581 146.645 146.244  1.00  0.00           H  
TER    4485      ASP A 280
CONECT    5   12
CONECT  129  133
CONECT  166  170
CONECT  192  196
CONECT  273  279
CONECT  342  348
CONECT  435  440
CONECT  623  628
CONECT  664  669
CONECT  680  685
CONECT  769  774
CONECT  947  952
CONECT  972  978
CONECT 1149 1154
CONECT 1242 1247
CONECT 1278 1284
CONECT 1385 1391
CONECT 1456 1461
CONECT 1490 1495
CONECT 1526 1531
CONECT 1580 1586
CONECT 1707 1712
CONECT 1823 1828
CONECT 2002 2007
CONECT 2038 2044
CONECT 2108 2113
CONECT 2168 2173
CONECT 2231 2237
CONECT 2356 2360
CONECT 2514 2519
CONECT 2545 2549
CONECT 2598 2603
CONECT 2635 2640
CONECT 2843 2848
CONECT 2967 2973
CONECT 2986 2990
CONECT 3029 3035
CONECT 3083 3088
CONECT 3129 3135
CONECT 3148 3153
CONECT 3162 3168
CONECT 3181 3186
CONECT 3195 3201
CONECT 3214 3219
CONECT 3246 3252
CONECT 3301 3307
CONECT 3363 3367
CONECT 3388 3394
CONECT 3448 3452
CONECT 3627 3633
CONECT 3690 3696
CONECT 3765 3769
CONECT 3934 3939
CONECT 3998 4002
CONECT 4019 4024
CONECT 4066 4071
CONECT 4119 4125
CONECT 4187 4193
CONECT 4239 4244
CONECT 2726 1481
CONECT 1481 2726
CONECT   12    5
CONECT  133  129
CONECT  170  166
CONECT  196  192
CONECT  279  273
CONECT  348  342
CONECT  440  435
CONECT  628  623
CONECT  669  664
CONECT  685  680
CONECT  774  769
CONECT  952  947
CONECT  978  972
CONECT 1154 1149
CONECT 1247 1242
CONECT 1284 1278
CONECT 1391 1385
CONECT 1461 1456
CONECT 1495 1490
CONECT 1531 1526
CONECT 1586 1580
CONECT 1712 1707
CONECT 1828 1823
CONECT 2007 2002
CONECT 2044 2038
CONECT 2113 2108
CONECT 2173 2168
CONECT 2237 2231
CONECT 2360 2356
CONECT 2519 2514
CONECT 2549 2545
CONECT 2603 2598
CONECT 2640 2635
CONECT 2848 2843
CONECT 2973 2967
CONECT 2990 2986
CONECT 3035 3029
CONECT 3088 3083
CONECT 3135 3129
CONECT 3153 3148
CONECT 3168 3162
CONECT 3186 3181
CONECT 3201 3195
CONECT 3219 3214
CONECT 3252 3246
CONECT 3307 3301
CONECT 3367 3363
CONECT 3394 3388
CONECT 3452 3448
CONECT 3633 3627
CONECT 3696 3690
CONECT 3769 3765
CONECT 3939 3934
CONECT 4002 3998
CONECT 4024 4019
CONECT 4071 4066
CONECT 4125 4119
CONECT 4193 4187
CONECT 4244 4239
END   
