# Supplementary figures and images for: Regulation of pulmonary surfactant by the adhesion GPCR GPR116/ADGRF5 requires a tethered agonist-mediated activation mechanism
Source: eLife journal article supplement (doi:10.7554/elife.69061), 2022-09-08

Figure 2 – figure supplement 1

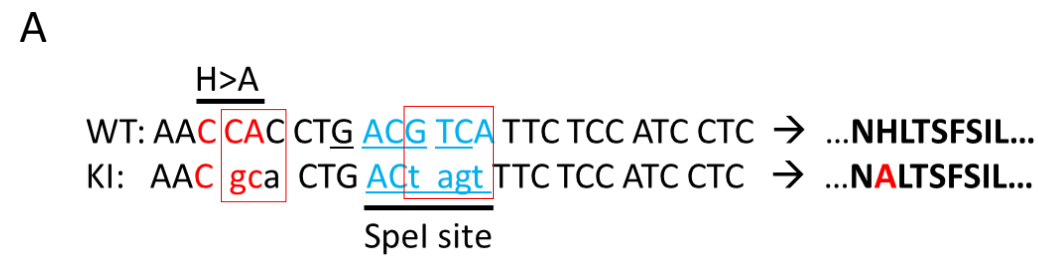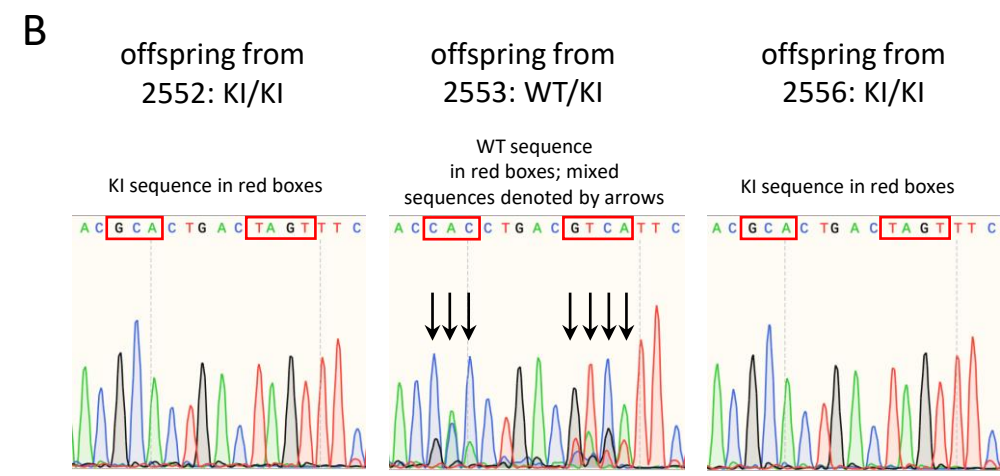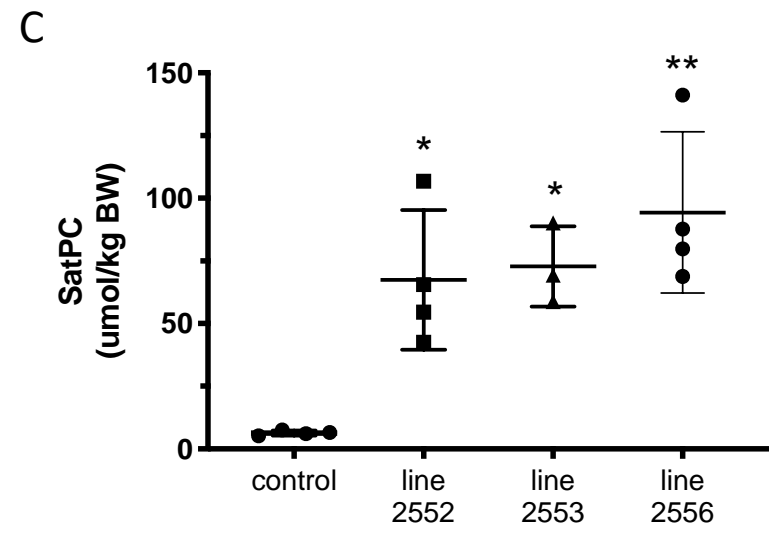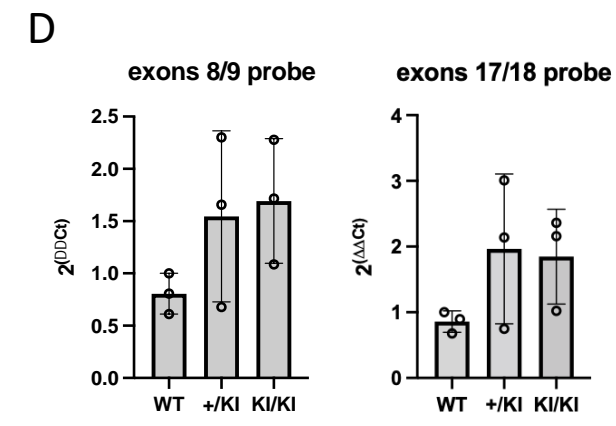

Supplement: supp [file elife-69061-supp-v1.zip › elife_poa_e69061_Figure_2_figure_supplement_1.pdf]

Figure 3 - supplement figure 1

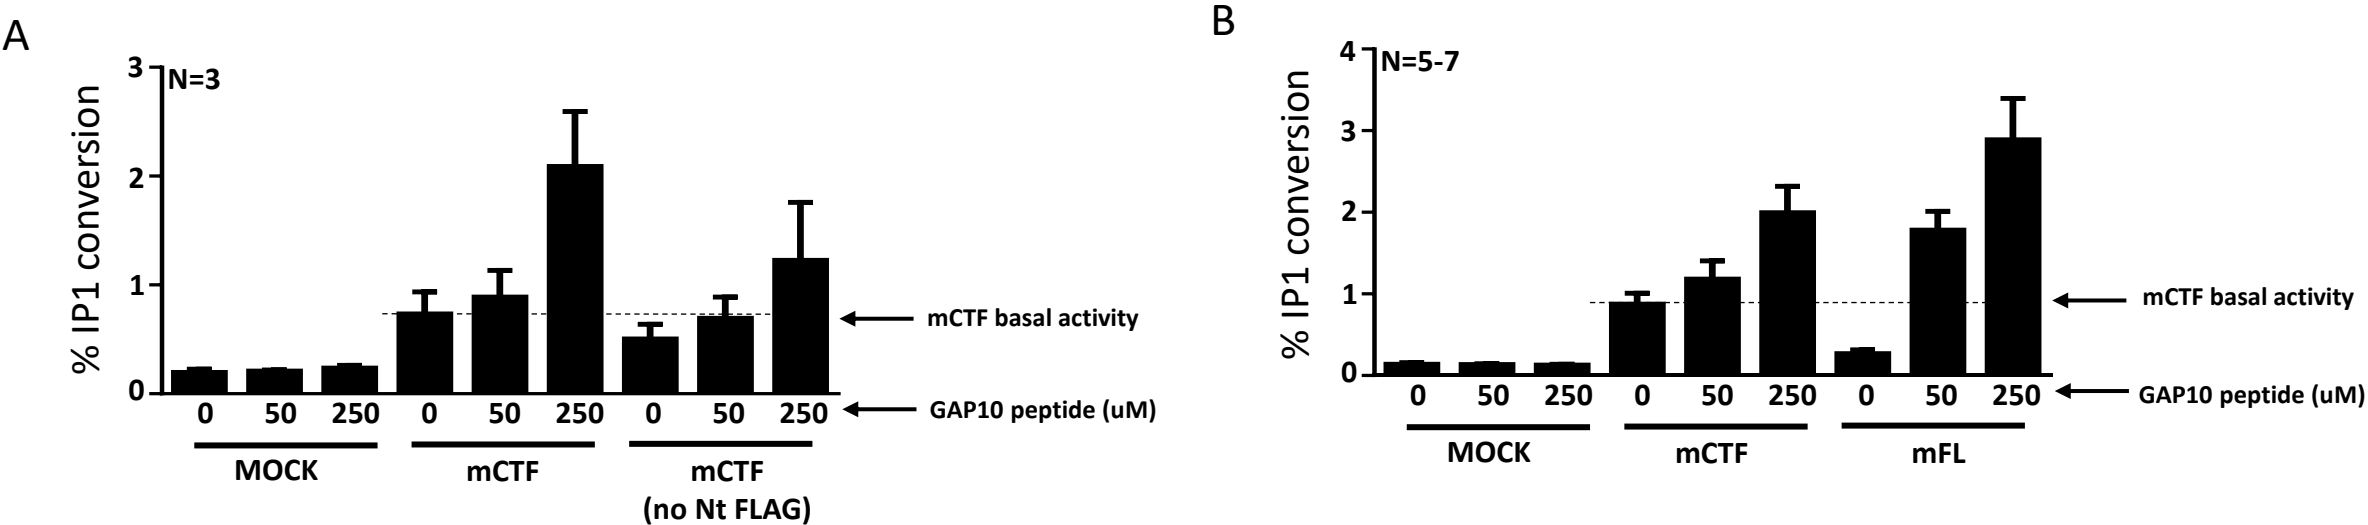

Supplement: supp [file elife-69061-supp-v1.zip › elife_poa_e69061_Figure_3_figure_supplement_1.pdf]

Figure 3 - supplement figure 2

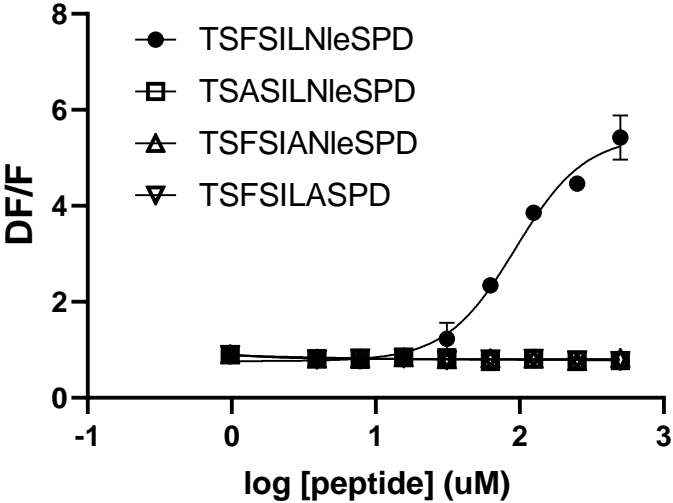

Supplement: supp [file elife-69061-supp-v1.zip › elife_poa_e69061_Figure_3_figure_supplement_2.pdf]

Figure 4 - supplement figure 1

A

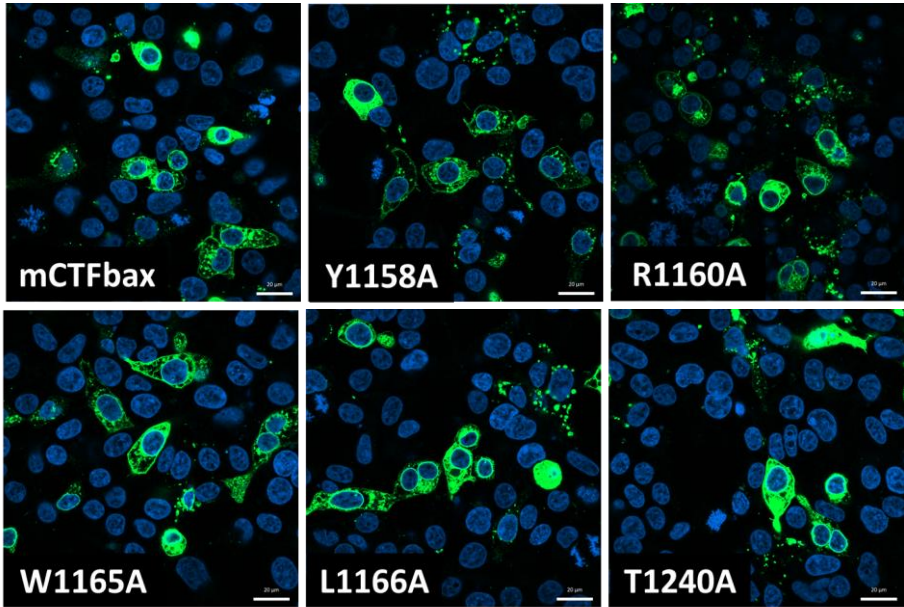

B

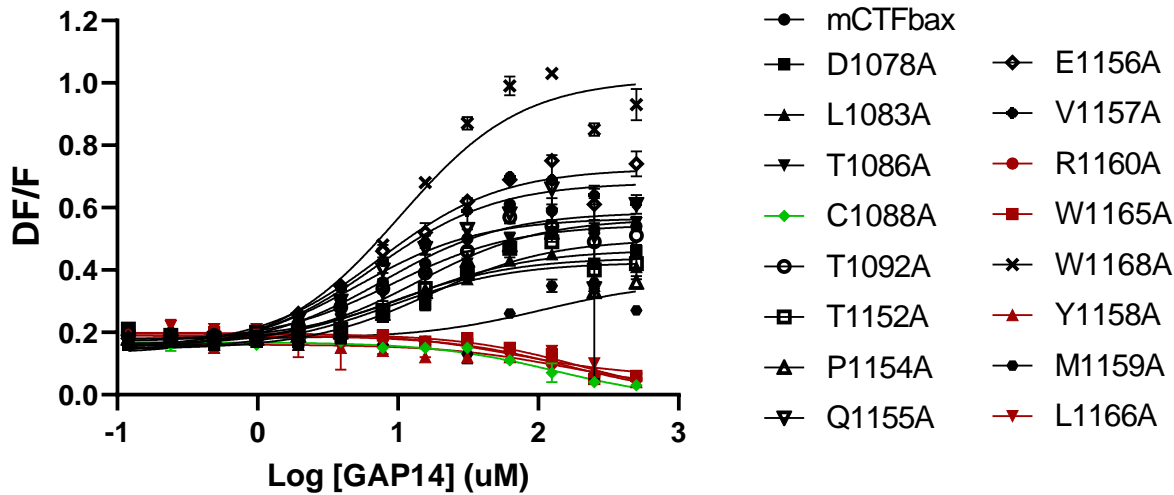

Supplement: supp [file elife-69061-supp-v1.zip › elife_poa_e69061_Figure_4_figure_supplement_1.pdf]

Figure 4 - supplement figure 3

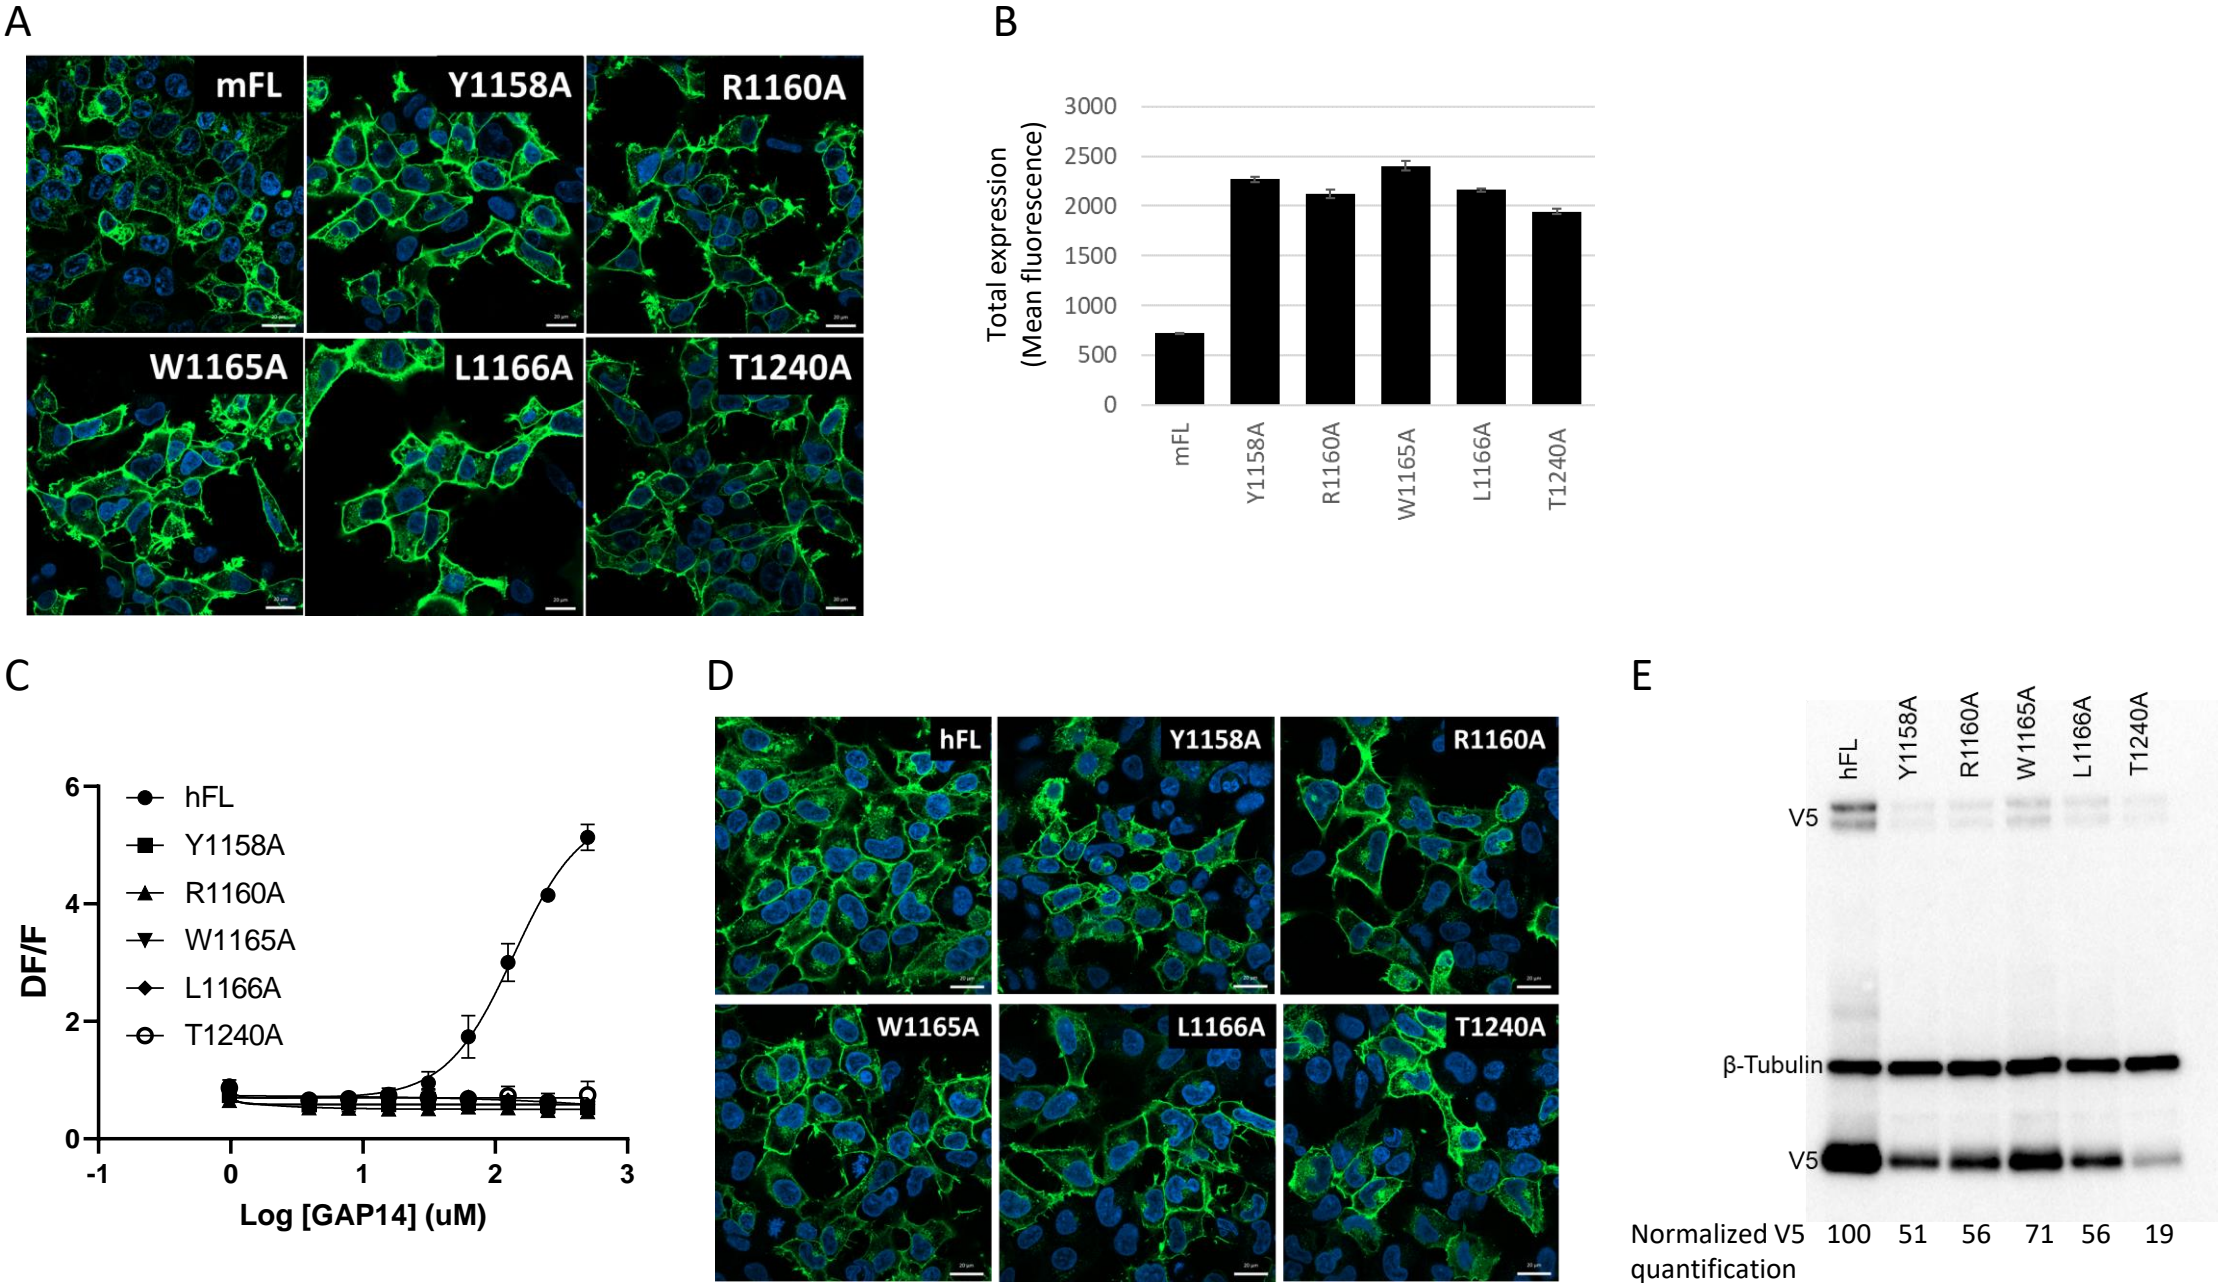

Supplement: supp [file elife-69061-supp-v1.zip › elife_poa_e69061_Figure_4_figure_supplement_3.pdf]

Figure 4 - supplement figure 4

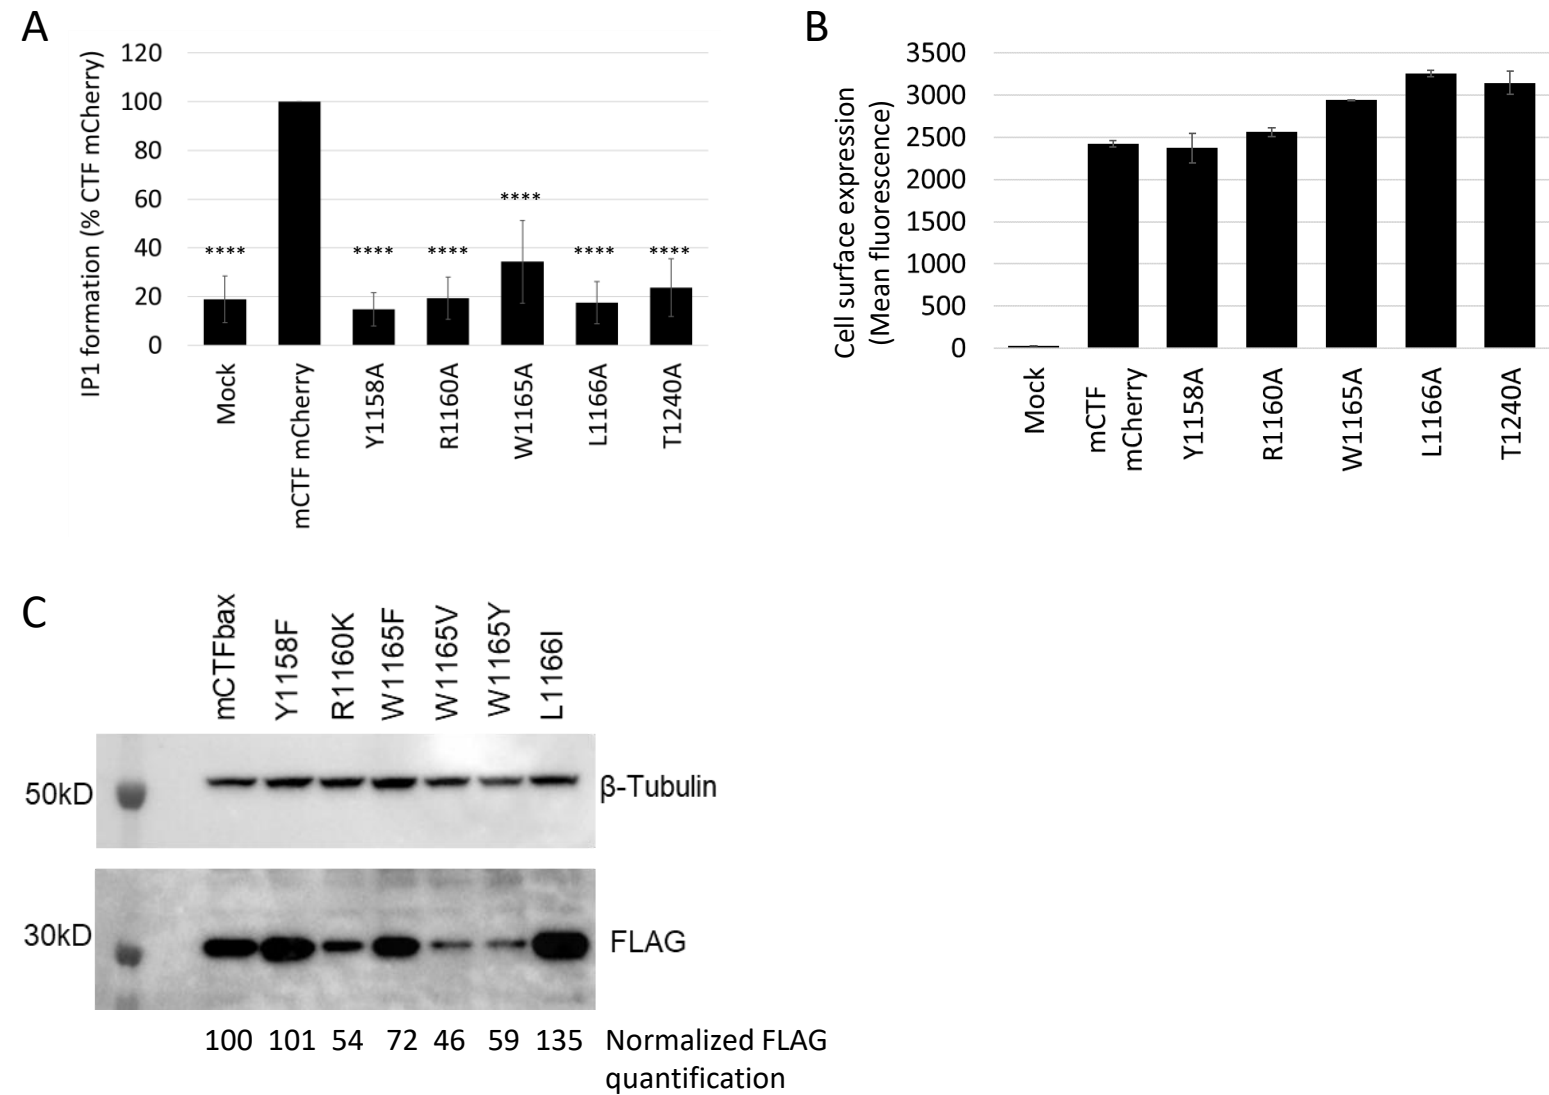

Supplement: supp [file elife-69061-supp-v1.zip › elife_poa_e69061_Figure_4_figure_supplement_4.pdf]

Figure 5 – supplement figure 1

A

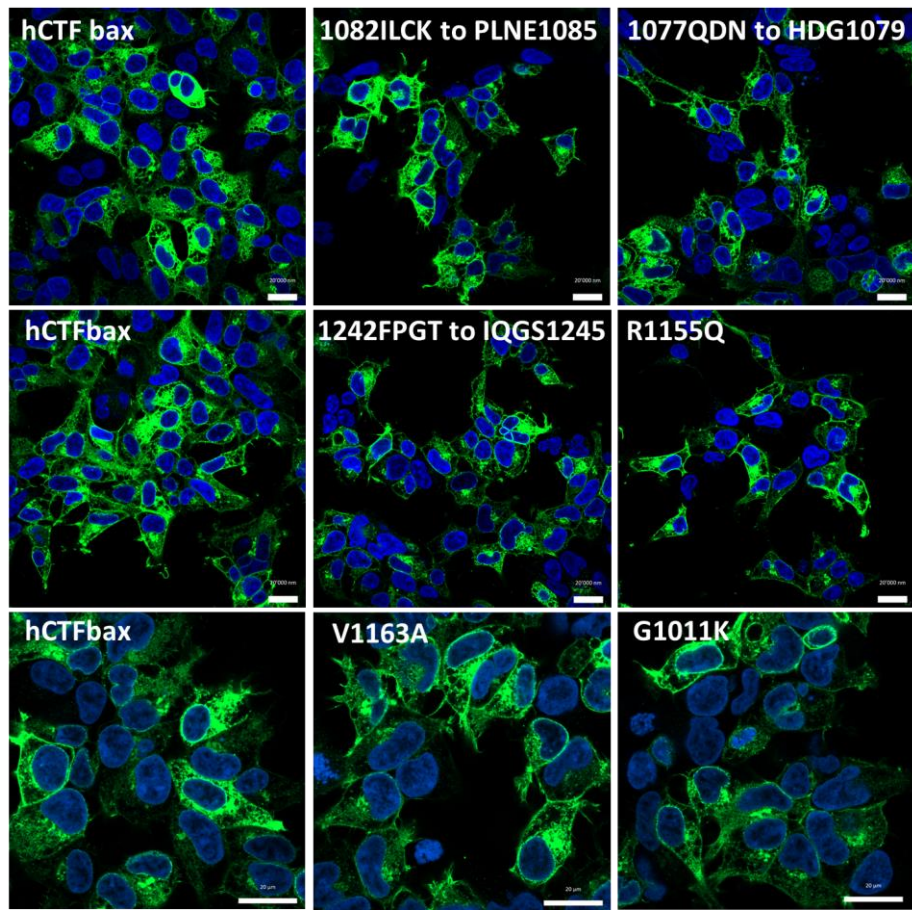

B

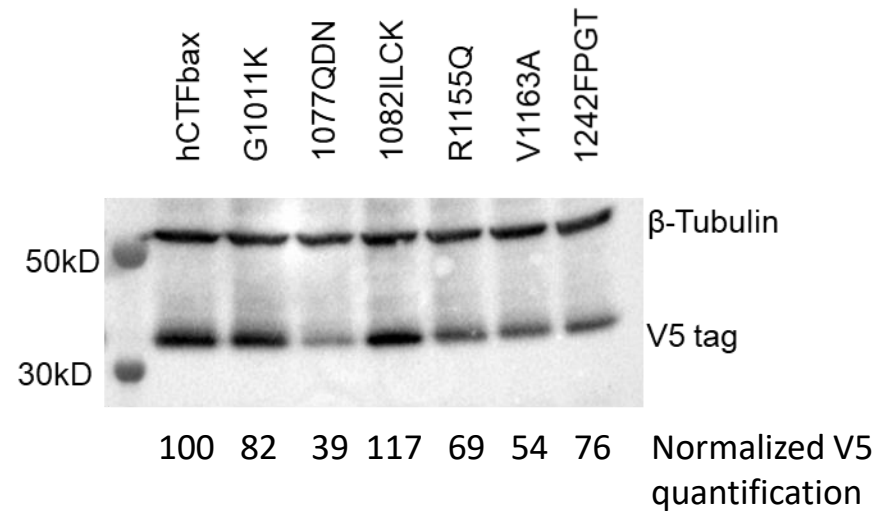

Supplement: supp [file elife-69061-supp-v1.zip › elife_poa_e69061_Figure_5_figure_supplement_1.pdf]

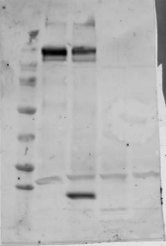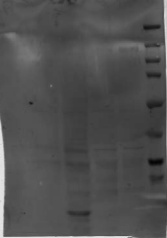

Supplement: supp [file elife-69061-supp-v1.zip › elife_poa_e69061_Figure_1_source_data_2.pdf]

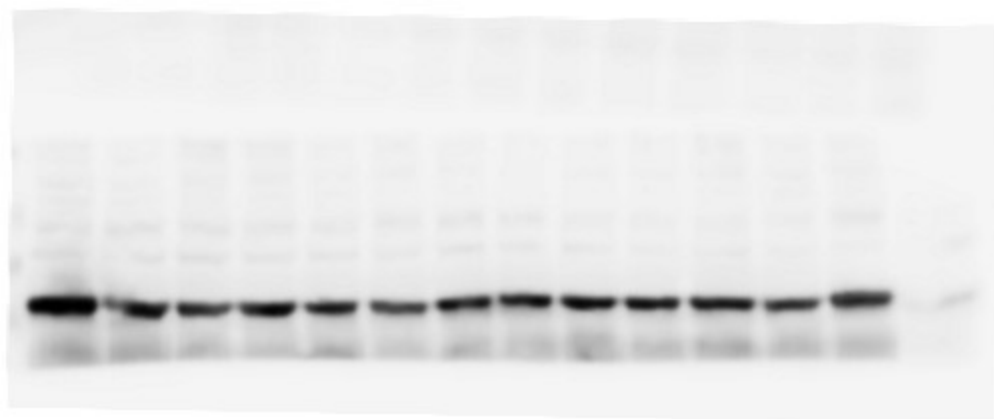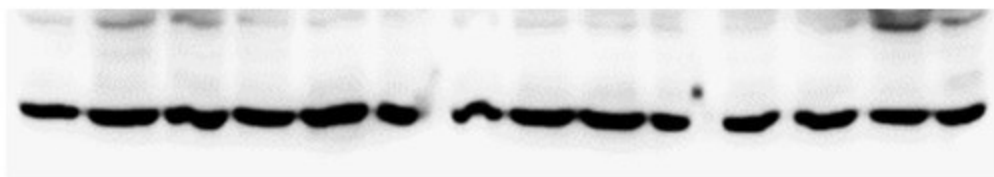

Supplement: supp [file elife-69061-supp-v1.zip › elife_poa_e69061_Figure_3_source_data_1.pdf]

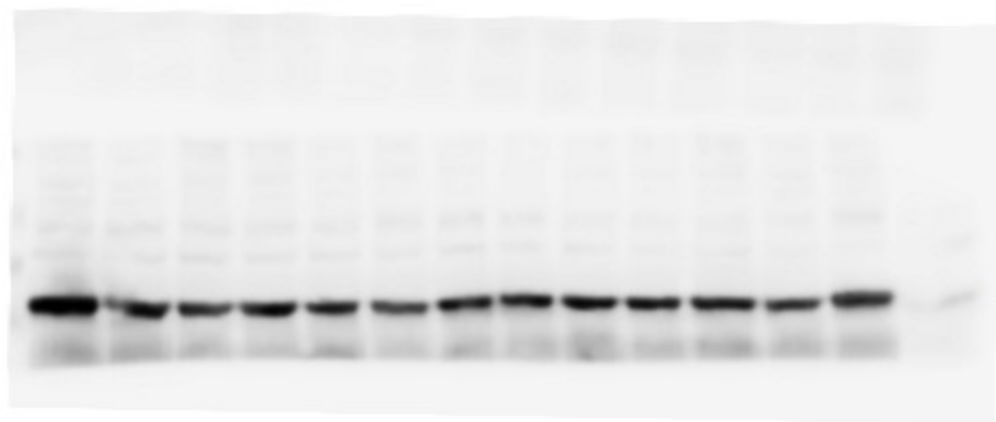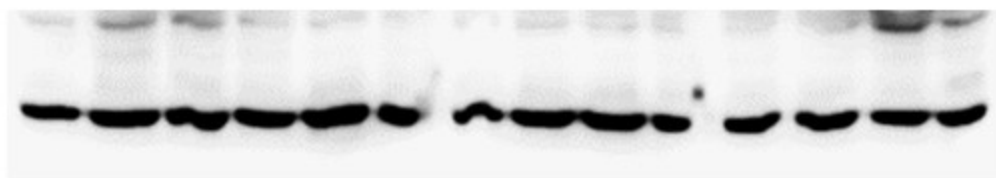

Supplement: supp [file elife-69061-supp-v1.zip › elife_poa_e69061_Figure_3_source_data_2.pdf]

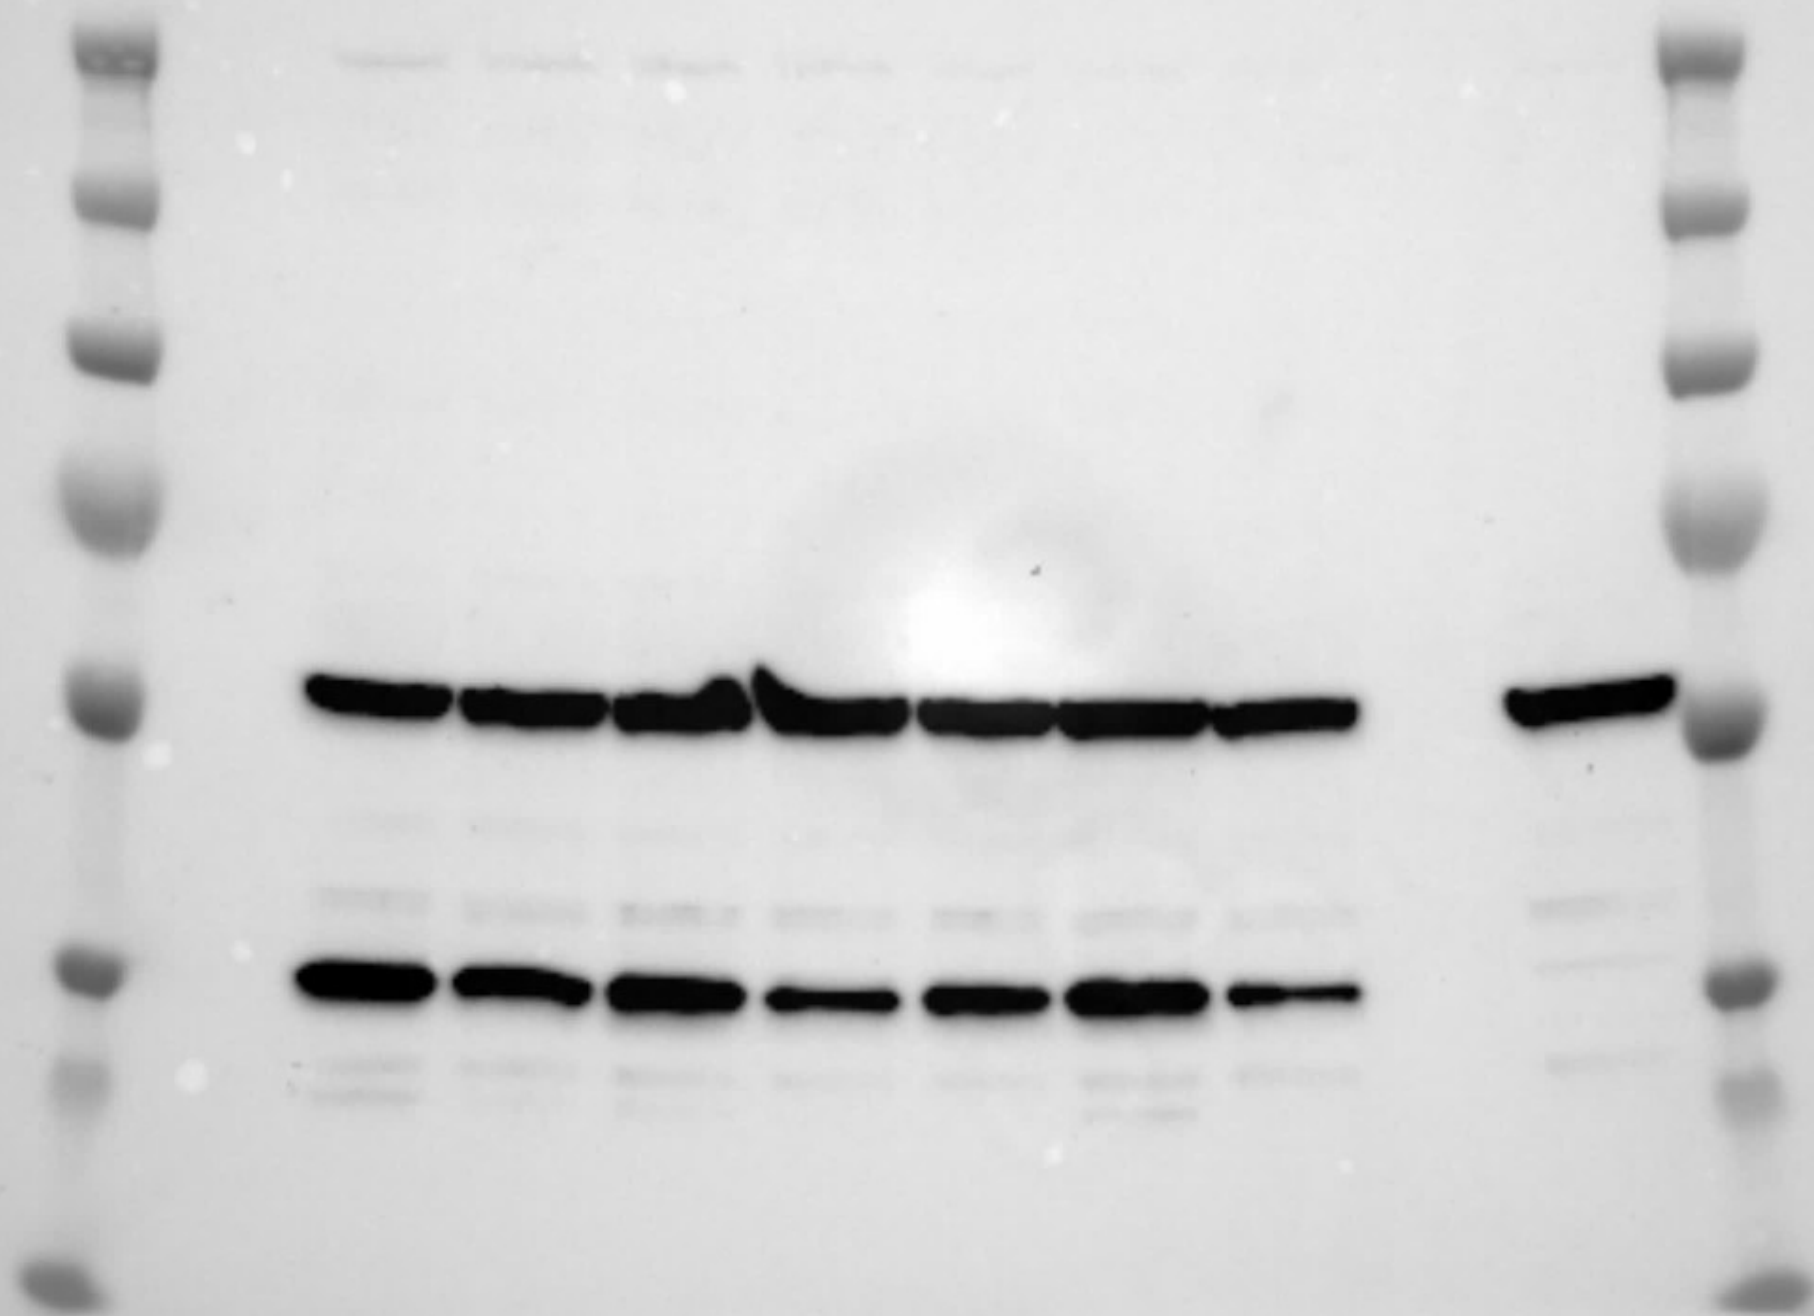

Supplement: supp [file elife-69061-supp-v1.zip › elife_poa_e69061_Figure_4_source_data_1.pdf]

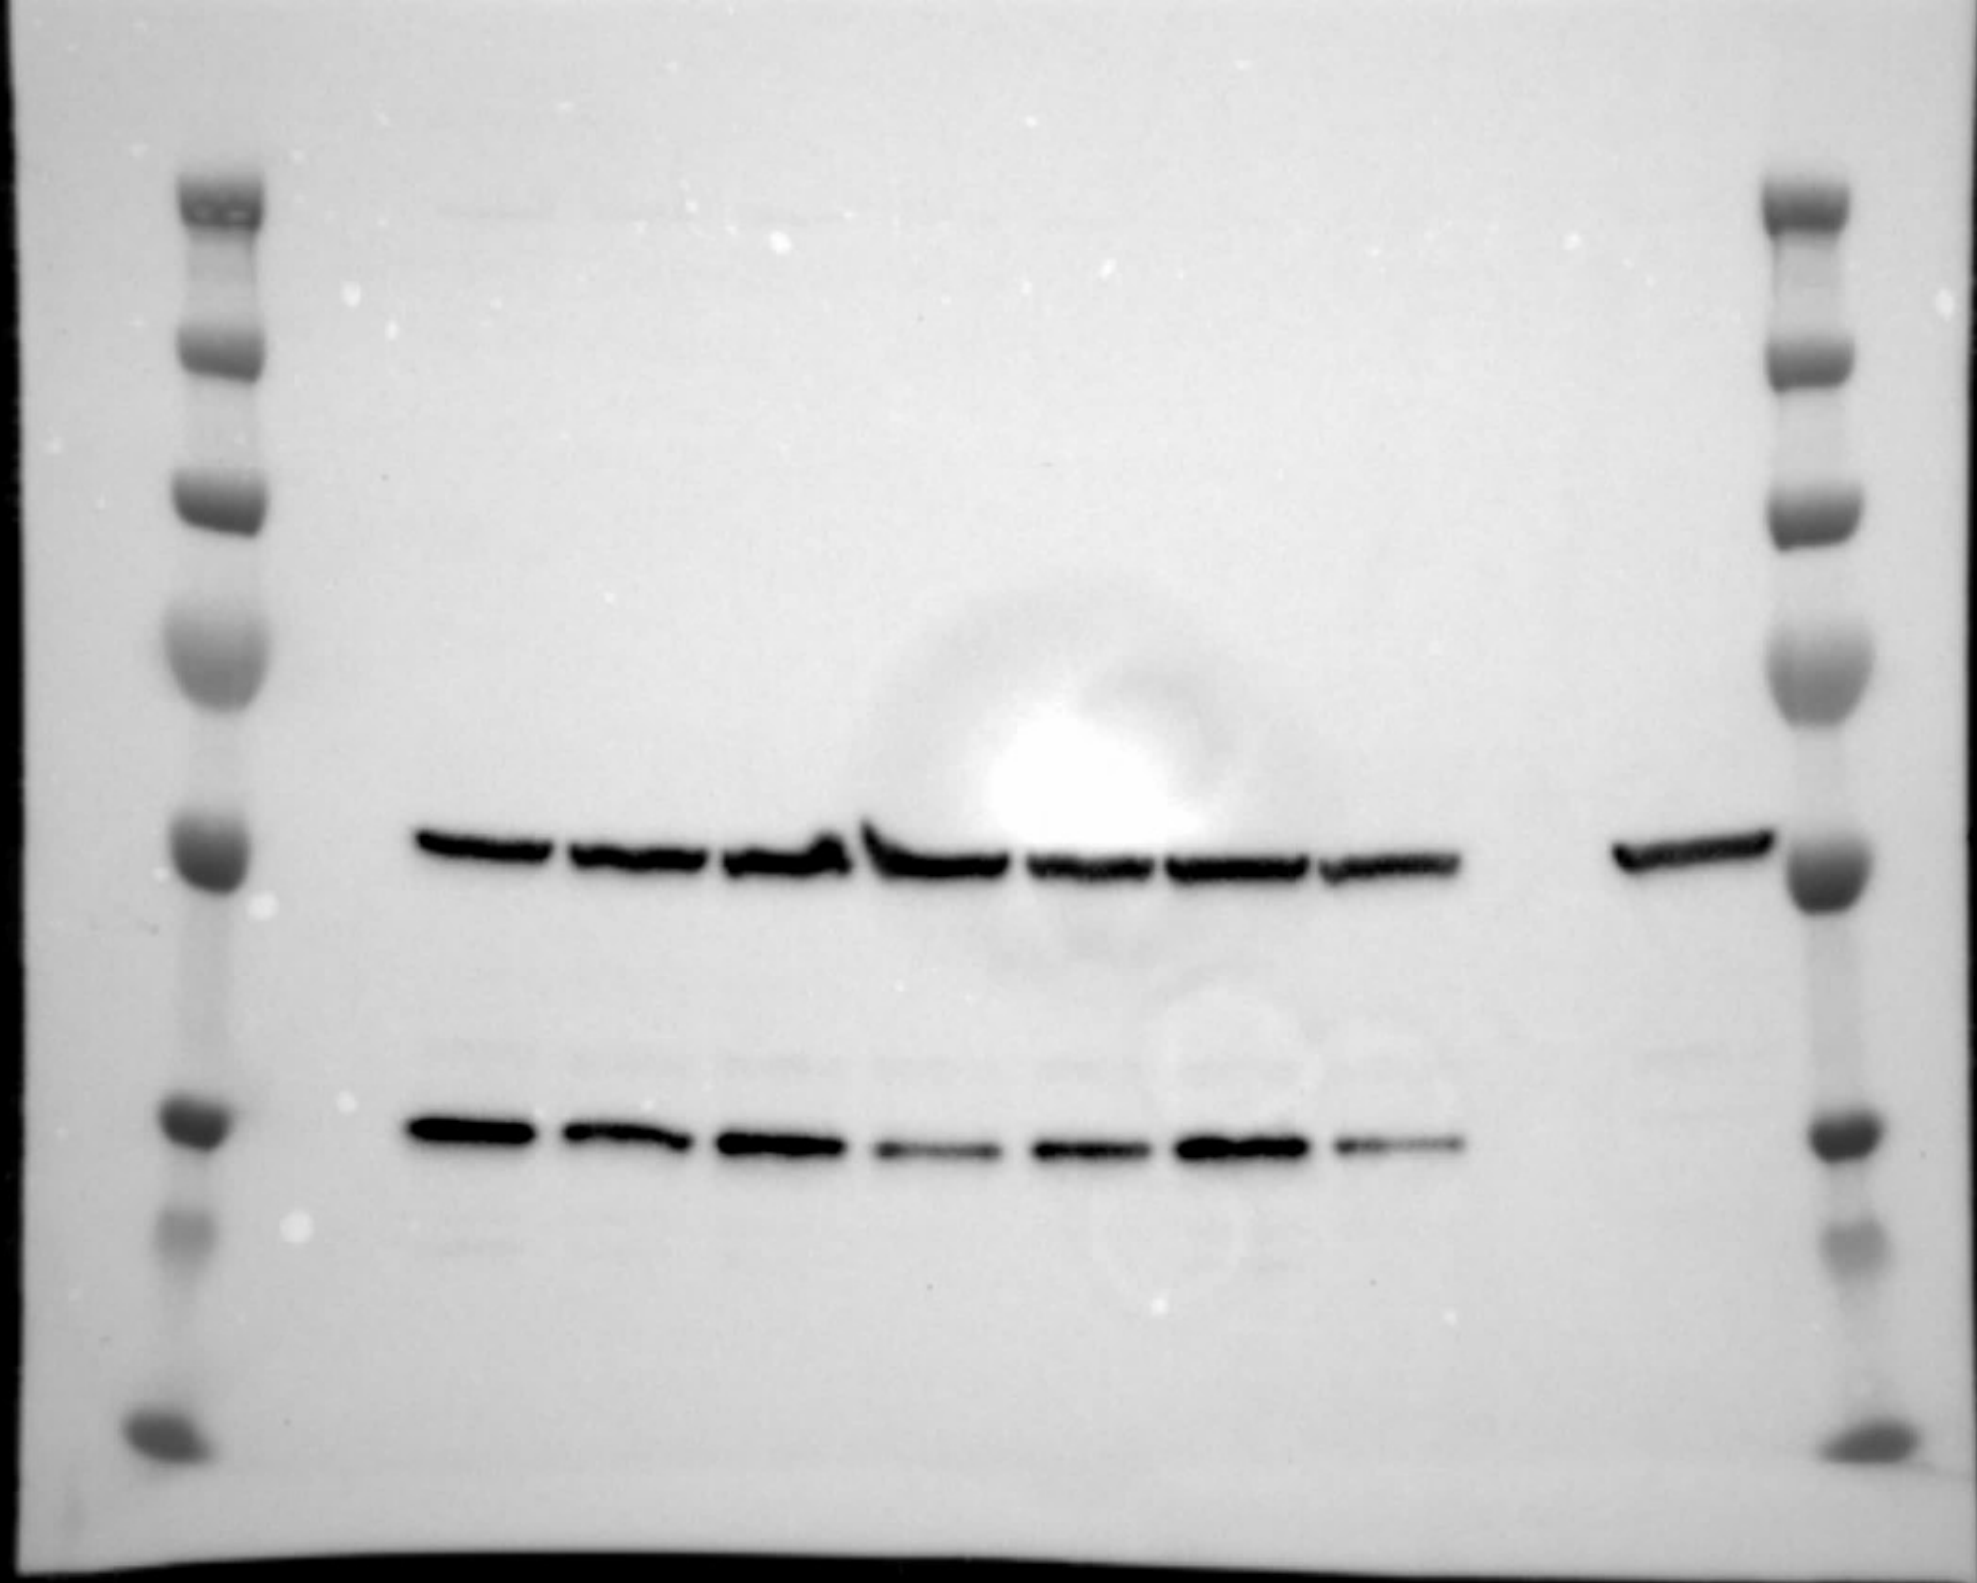

Supplement: supp [file elife-69061-supp-v1.zip › elife_poa_e69061_Figure_4_source_data_2.pdf]

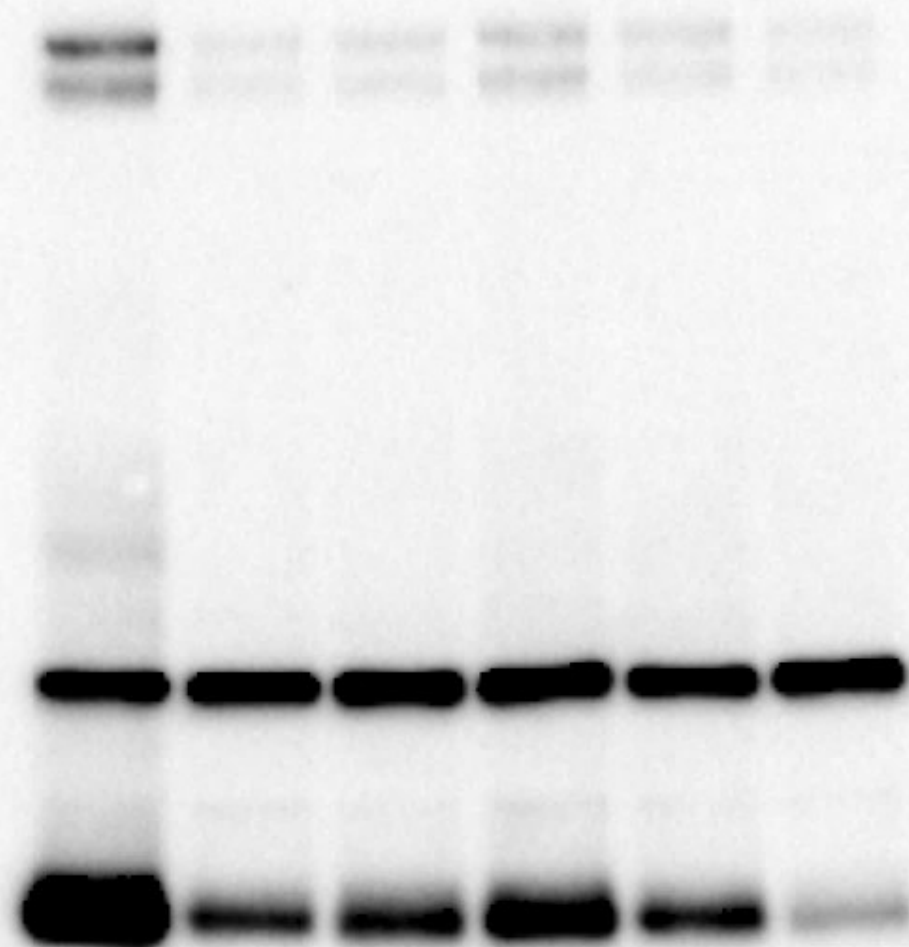

Supplement: supp [file elife-69061-supp-v1.zip › elife_poa_e69061_Figure_4_source_data_5.pdf]

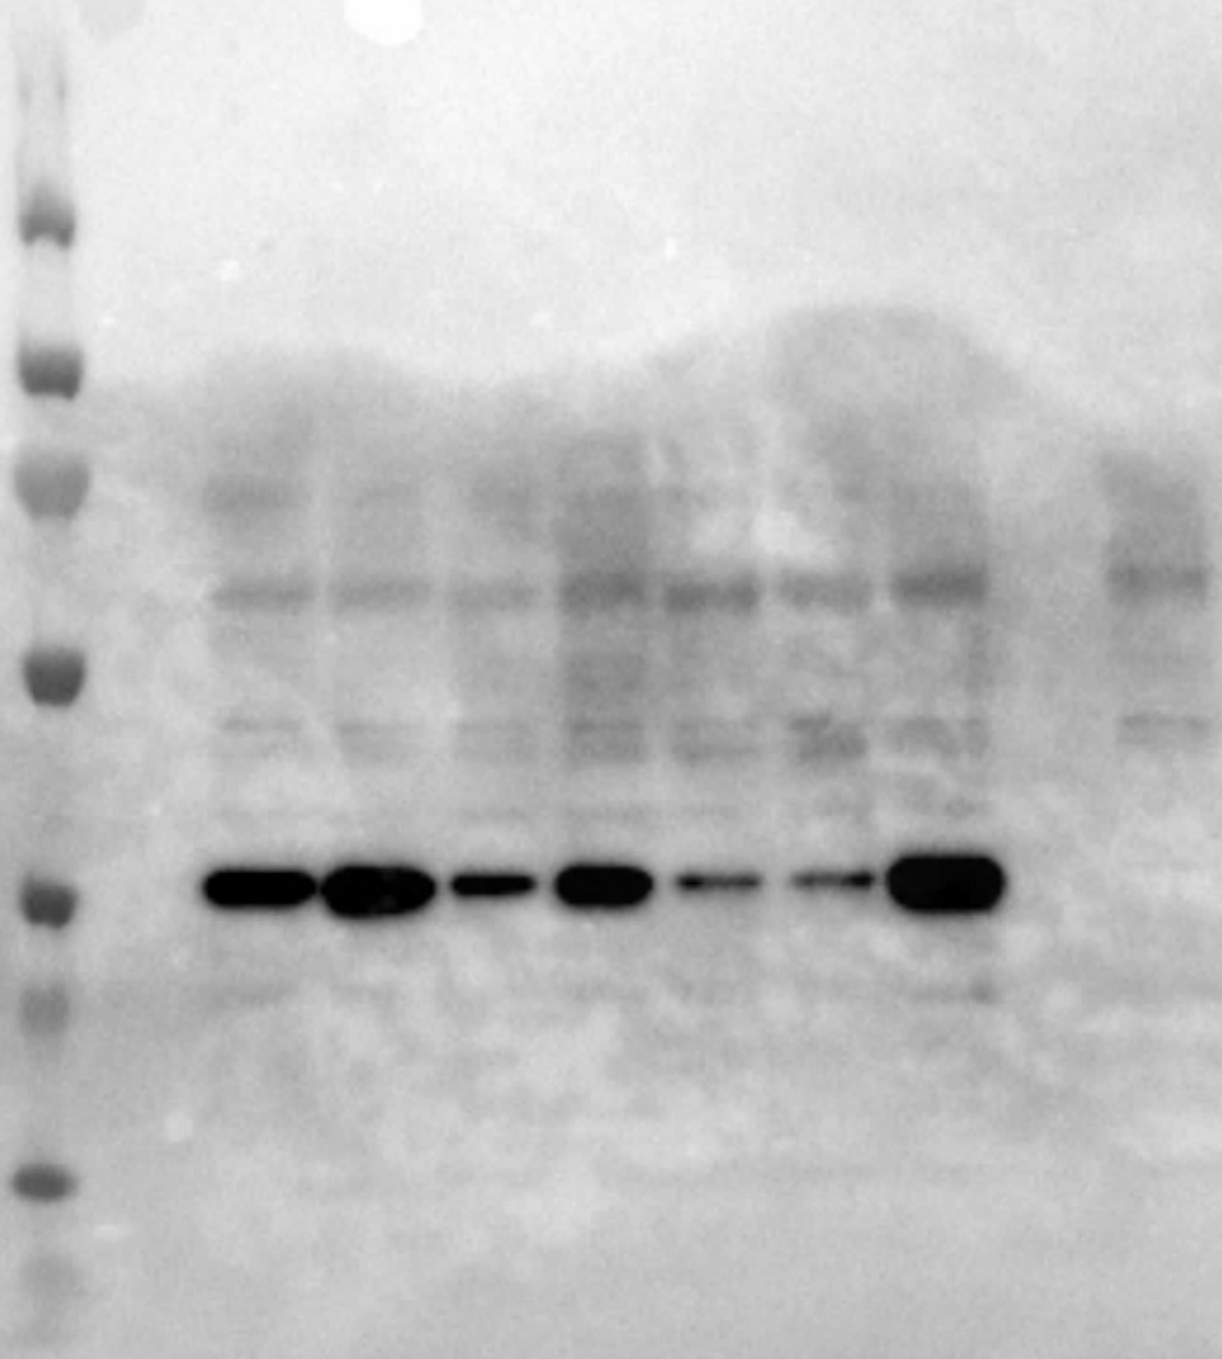

Supplement: supp [file elife-69061-supp-v1.zip › elife_poa_e69061_Figure_4_source_data_7.pdf]

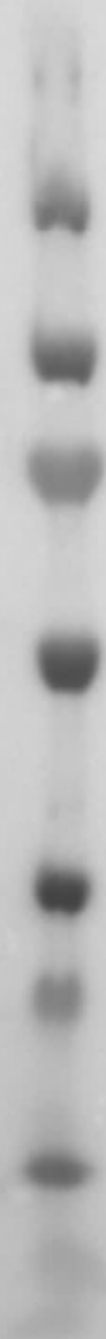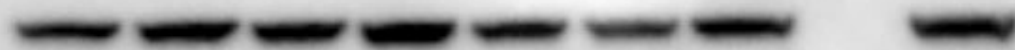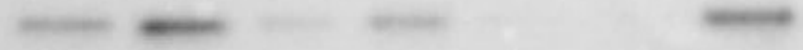

Supplement: supp [file elife-69061-supp-v1.zip › elife_poa_e69061_Figure_4_source_data_8.pdf]

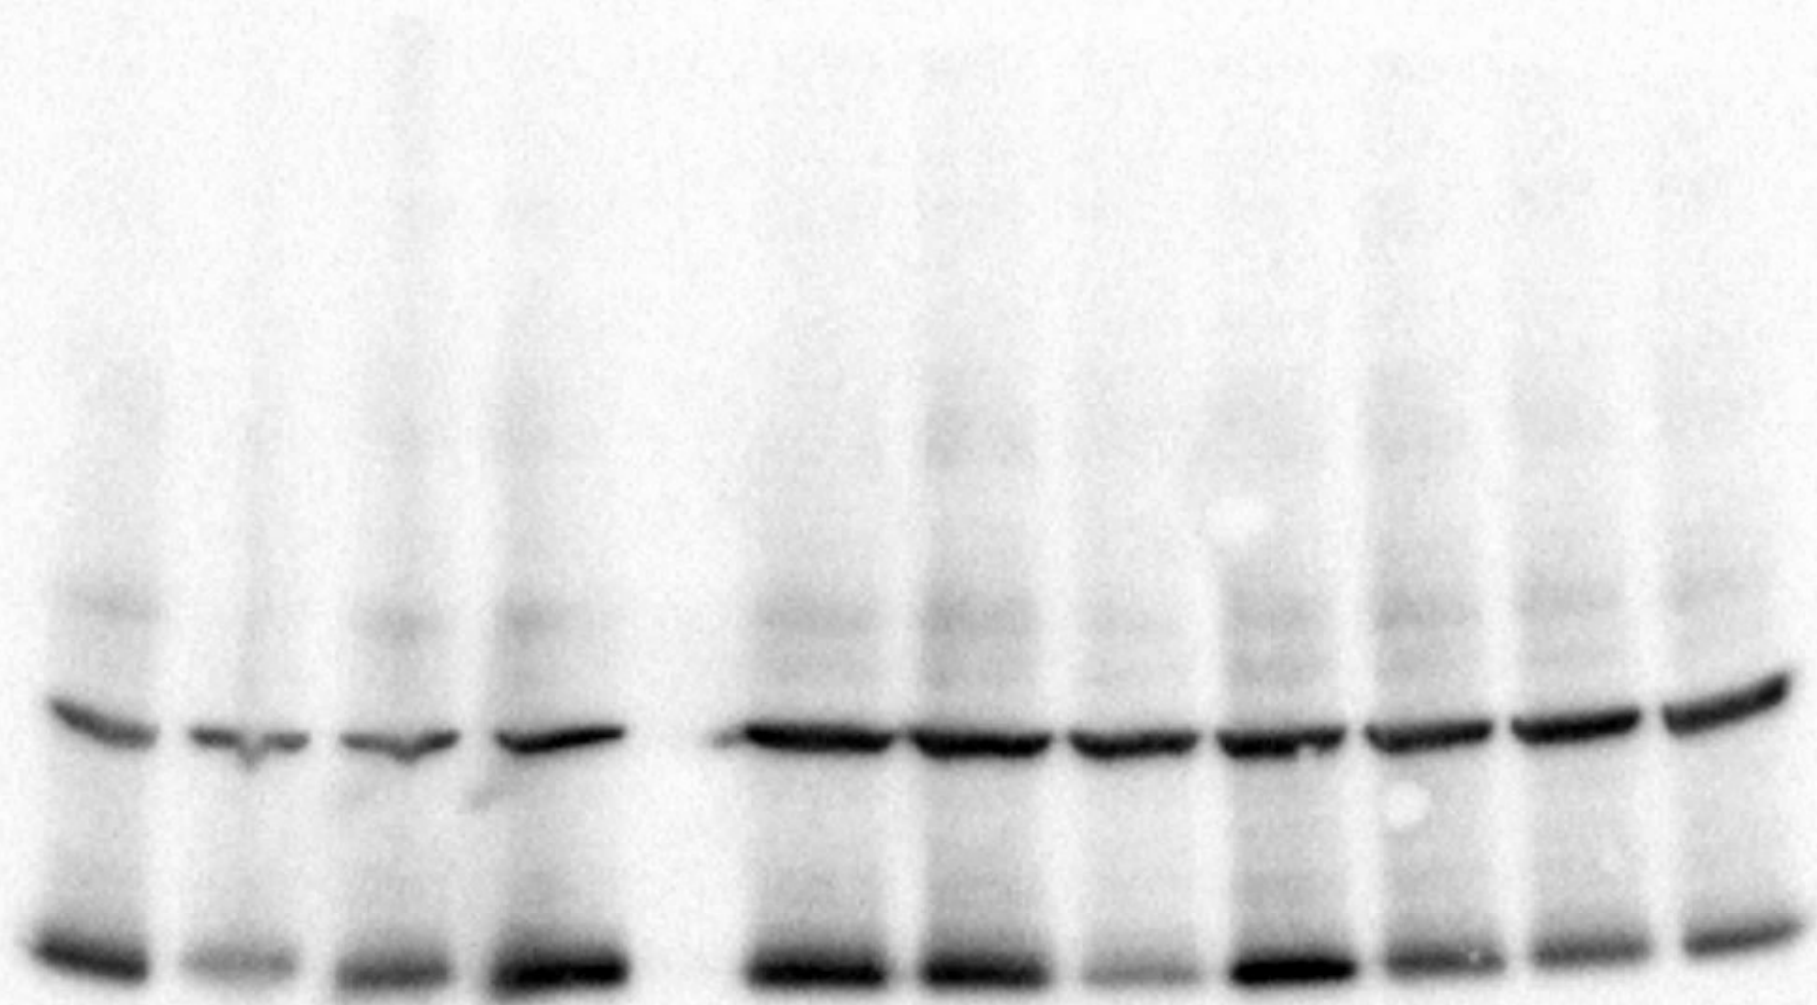

100kDa 100kDa 100kDa 100kDa 100kDa 100kDa 100kDa 100kDa 100kDa 100kDa

Supplement: supp [file elife-69061-supp-v1.zip › elife_poa_e69061_Figure_5_source_data_1.pdf]

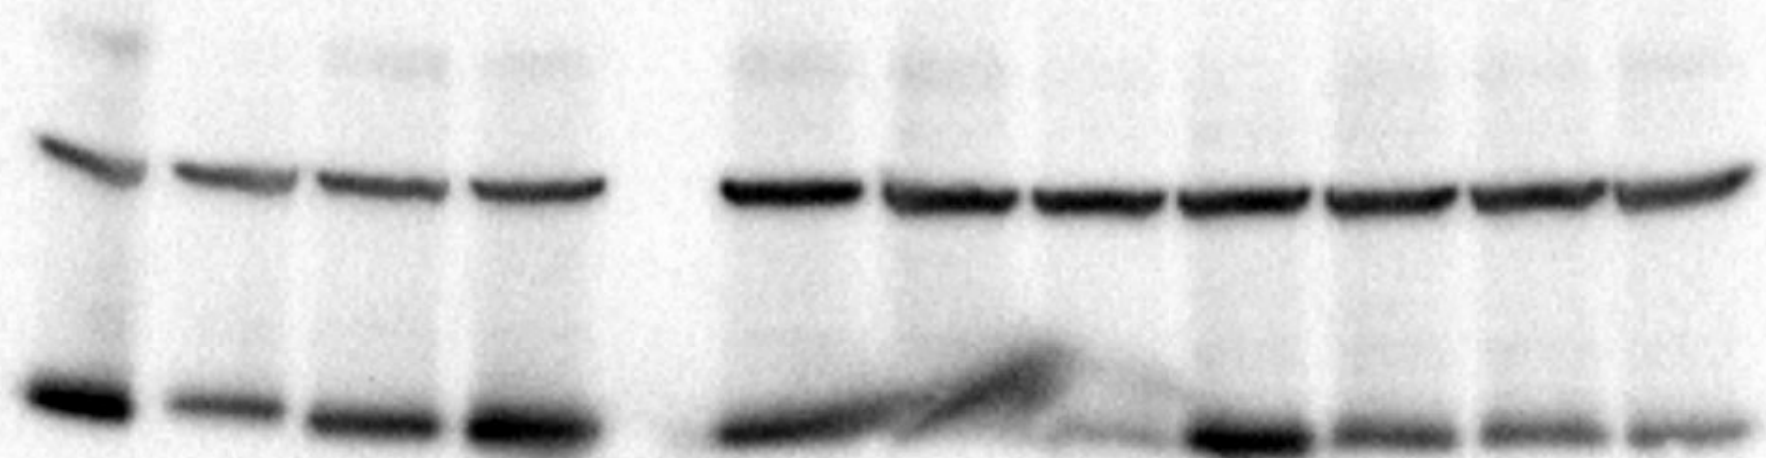

Supplement: supp [file elife-69061-supp-v1.zip › elife_poa_e69061_Figure_6_source_data_1.pdf]
